# Supplementary material
Source: PubMed Central journal article supplement (PMC3923315)
Supplement: NIHMS544578-supplement-Supplementary_Data_2.pdf [file NIHMS544578-supplement-Supplementary_Data_2.pdf]

Genes Altered by combination treatment in hBT70 and/or hBT112

[COMPARE\_CRITERIA\_V2]

\$NUM\_OPTION\_LINE=5

\$ARRAY\_LIST\_FILE=

\$COMPARE\_ON\_GENE\_LIST=

\$COMPARE\_ON\_USE\_LIST=1

\$AVERAGE\_USING\_STANDARD\_ERROR=Yes

\$OMIT\_AFFY\_CONTROL\_GENE=Yes

\$NUM\_CRITERION=6

\$Parenthesis Combine

|          | Baseline | Experiment | E/B> |
|----------|----------|------------|------|
| \$No and | 1,2      | 3,4        | 1.5  |
| \$No or  | 1,2      | 5,6        | 1.5  |
| \$No or  | 1,2      | 7,8        | 1.5  |
| \$No or  | 9,10     | 11,12      | 1.5  |
| \$No or  | 9,10     | 13,14      | 1.5  |
| \$No or  | 9,10     | 15,16      | 1.5  |

[COMPARE\_RESULT]

| probe set       | gene                                            | Accession | EntrezGene | Description           |
|-----------------|-------------------------------------------------|-----------|------------|-----------------------|
| 61 203508_at    | tumor necrosis factor receptor superfamily, me  | NM_001066 | 7133       | gb:NM_001066.1 /DB    |
| 114 205483_s_at | ISG15 ubiquitin-like modifier                   | NM_005101 | 9636       | gb:NM_005101.1 /DB    |
| 138 206382_s_at | brain-derived neurotrophic factor               | NM_001709 | 627        | gb:NM_001709.1 /DEI   |
| 199 209496_at   | retinoic acid receptor responder (tazarotene in | BC000069  | 5919       | gb:BC000069.1 /DB_>   |
| 207 210036_s_at | potassium voltage-gated channel, subfamily H    | AB044806  | 3757       | gb:AB044806.1 /DEF=   |
| 393 222150_s_at | hypothetical protein LOC54103                   | AK026747  | 54103      | Consensus includes gt |
| 1 200678_x_at   | granulin                                        | NM_002087 | 2896       | gb:NM_002087.1 /DB    |
| 3 201008_s_at   | thioredoxin interacting protein                 | NM_006472 | 10628      | Consensus includes gt |
| 4 201009_s_at   | thioredoxin interacting protein                 | NM_006472 | 10628      | Consensus includes gt |
| 5 201010_s_at   | thioredoxin interacting protein                 | NM_006472 | 10628      | gb:NM_006472.1 /DB    |
| 8 201125_s_at   | integrin, beta 5                                | NM_002213 | 3693       | gb:NM_002213.1 /DB    |
| 9 201200_at     | cellular repressor of E1A-stimulated genes 1    | NM_003851 | 8804       | gb:NM_003851.1 /DB    |
| 10 201261_x_at  | biglycan                                        | BC002416  | 633        | gb:BC002416.1 /DB_>   |
| 12 201286_at    | syndecan 1                                      | Z48199    | 6382       | gb:Z48199 /DB_XREF    |
| 13 201287_s_at  | syndecan 1                                      | NM_002997 | 6382       | gb:NM_002997.1 /DB    |
| 17 201408_at    | protein phosphatase 1, catalytic subunit, beta  | W67887    | 5500       | Consensus includes gt |
| 19 201506_at    | transforming growth factor, beta-induced, 68k   | NM_000358 | 7045       | gb:NM_000358.1 /DB    |
| 21 201693_s_at  | early growth response 1                         | NM_001964 | 1958       | Consensus includes gt |

|    |             |                                                   |           |        |                       |
|----|-------------|---------------------------------------------------|-----------|--------|-----------------------|
| 23 | 201744_s_at | lumican                                           | NM_002345 | 4060   | gb:NM_002345.1 /DB    |
| 24 | 201787_at   | fibulin 1                                         | NM_001996 | 2192   | gb:NM_001996.1 /DB    |
| 25 | 201882_x_at | UDP-Gal:betaGlcNAc beta 1,4- galactosyltransf     | AI492393  | 2683   | Consensus includes gt |
| 26 | 201893_x_at | decorin                                           | AF138300  | 1634   | gb:AF138300.1 /DB_X   |
| 28 | 202270_at   | guanylate binding protein 1, interferon-inducib   | NM_002053 | 2633   | gb:NM_002053.1 /DB    |
| 29 | 202274_at   | actin, gamma 2, smooth muscle, enteric            | NM_001615 | 72     | gb:NM_001615.2 /DB    |
| 32 | 202351_at   | integrin, alpha V (vitronectin receptor, alpha p  | AI093579  | 3685   | gb:AI093579 /DB_XRF   |
| 34 | 202465_at   | procollagen C-endopeptidase enhancer              | NM_002593 | 5118   | gb:NM_002593.2 /DB    |
| 35 | 202497_x_at | solute carrier family 2 (facilitated glucose tran | AI631159  | 6515   | Consensus includes gt |
| 37 | 202575_at   | cellular retinoic acid binding protein 2          | NM_001878 | 1382   | gb:NM_001878.2 /DB    |
| 39 | 202659_at   | proteasome (prosome, macropain) subunit, be       | NM_002801 | 5699   | gb:NM_002801.1 /DB    |
| 40 | 202708_s_at | histone 2, H2be                                   | NM_003528 | 8349   | gb:NM_003528.1 /DEI   |
| 43 | 202788_at   | mitogen-activated protein kinase-activated prc    | NM_004635 | 7867   | gb:NM_004635.1 /DB    |
| 44 | 202834_at   | angiotensinogen (serpin peptidase inhibitor, cl   | NM_000029 | 183    | gb:NM_000029.1 /DB    |
| 47 | 202949_s_at | four and a half LIM domains 2                     | NM_001450 | 2274   | gb:NM_001450.1 /DB    |
| 48 | 203017_s_at | synovial sarcoma, X breakpoint 2 interacting p    | R52678    | 117178 | gb:R52678 /DB_XREF    |
| 49 | 203059_s_at | 3'-phosphoadenosine 5'-phosphosulfate synth       | NM_004670 | 9060   | gb:NM_004670.1 /DEI   |
| 51 | 203153_at   | interferon-induced protein with tetratricopeptic  | NM_001548 | 3434   | gb:NM_001548.1 /DB    |
| 52 | 203186_s_at | S100 calcium binding protein A4 (calcium prot     | NM_002961 | 6275   | gb:NM_002961.2 /DEI   |
| 59 | 203485_at   | reticulon 1                                       | NM_021136 | 6252   | gb:NM_021136.1 /DB    |
| 60 | 203504_s_at | ATP-binding cassette, sub-family A (ABC1), m      | AF285167  | 19     | gb:NM_005502.1 /DEI   |
| 63 | 203650_at   | protein C receptor, endothelial (EPCR)            | NM_006404 | 10544  | gb:NM_006404.1 /DB    |
| 65 | 203770_s_at | steroid sulfatase (microsomal), arylsulfatase C   | NM_000351 | 412    | gb:J04964.1 /DEF=Hu   |
| 68 | 203918_at   | protocadherin 1 (cadherin-like 1)                 | NM_002587 | 5097   | gb:NM_002587.1 /DB    |
| 69 | 204017_at   | KDEL (Lys-Asp-Glu-Leu) endoplasmic reticulun      | NM_006855 | 11015  | gb:NM_006855.2 /DB    |
| 70 | 204041_at   | monoamine oxidase B                               | NM_000898 | 4129   | gb:NM_000898.1 /DEI   |
| 71 | 204058_at   | Malic enzyme 1, NADP(+)-dependent, cytosolic      | AL049699  | 4199   | gb:AL049699 /DB_XRF   |
| 75 | 204222_s_at | GLI pathogenesis-related 1 (glioma)               | U16307    | 11010  | gb:NM_006851.1 /DEI   |
| 76 | 204268_at   | S100 calcium binding protein A2                   | NM_005978 | 6273   | gb:NM_005978.2 /DB    |
| 80 | 204498_s_at | adenylate cyclase 9                               | NM_001116 | 115    | gb:NM_001116.1 /DB    |
| 81 | 204540_at   | eukaryotic translation elongation factor 1 alph   | NM_001958 | 1917   | gb:NM_001958.1 /DEI   |
| 82 | 204548_at   | steroidogenic acute regulator                     | NM_000349 | 6770   | gb:NM_000349.1 /DB    |
| 85 | 204592_at   | discs, large homolog 4 (Drosophila)               | NM_001365 | 1742   | gb:NM_001365.1 /DB    |
| 86 | 204595_s_at | stanniocalcin 1                                   | AI300520  | 6781   | gb:AI300520 /DB_XRF   |
| 87 | 204597_x_at | stanniocalcin 1                                   | NM_003155 | 6781   | gb:NM_003155.1 /DEI   |
| 89 | 204639_at   | adenosine deaminase                               | NM_000022 | 100    | gb:NM_000022.1 /DB    |

|     |             |                                                        |           |                  |                        |
|-----|-------------|--------------------------------------------------------|-----------|------------------|------------------------|
| 90  | 204698_at   | interferon stimulated exonuclease gene 20kDa           | NM_002201 | 3669             | gb:NM_002201.2 /DEI    |
| 91  | 204724_s_at | collagen, type IX, alpha 3                             | NM_001853 | 1299             | gb:NM_001853.1 /DEI    |
| 92  | 204730_at   | regulating synaptic membrane exocytosis 3              | NM_014747 | 9783             | gb:NM_014747.1 /DB     |
| 94  | 204749_at   | nucleosome assembly protein 1-like 3                   | NM_004538 | 4675             | gb:NM_004538.1 /DEI    |
| 95  | 204777_s_at | mal, T-cell differentiation protein                    | NM_002371 | 4118             | gb:NM_002371.2 /DEI    |
| 99  | 205150_s_at | KIAA0644 gene product                                  | AV724192  | 9865             | gb:AV724192 /DB_XR     |
| 100 | 205151_s_at | KIAA0644 gene product                                  | AV724192  | 9865             | gb:NM_014817.1 /DEI    |
| 102 | 205222_at   | enoyl-Coenzyme A, hydratase/3-hydroxyacyl C            | NM_001966 | 1962             | gb:NM_001966.1 /DB     |
| 103 | 205226_at   | platelet-derived growth factor receptor-like           | NM_006207 | 5157             | gb:NM_006207.1 /DEI    |
| 106 | 205262_at   | potassium voltage-gated channel, subfamily H           | NM_000238 | 3757             | gb:NM_000238.1 /DB     |
| 112 | 205440_s_at | neuropeptide Y receptor Y1                             | NM_000909 | 4886             | gb:NM_000909.1 /DB     |
| 113 | 205475_at   | scrapie responsive protein 1                           | NM_007281 | 11341            | gb:NM_007281.1 /DEI    |
| 118 | 205579_at   | histamine receptor H1                                  | NM_000861 | 3269             | gb:NM_000861.2 /DEI    |
| 120 | 205673_s_at | ankyrin repeat and SOCS box-containing 9               | NM_024087 | 140462           | gb:NM_024087.1 /DEI    |
| 121 | 205738_s_at | fatty acid binding protein 3, muscle and heart         | NM_004102 | 2170             | gb:NM_004102.2 /DEI    |
| 122 | 205744_at   | double C2-like domains, alpha                          | NM_003586 | 8448             | gb:NM_003586.1 /DB     |
| 124 | 205774_at   | coagulation factor XII (Hageman factor)                | NM_000505 | 2161             | gb:NM_000505.2 /DB     |
| 125 | 205805_s_at | receptor tyrosine kinase-like orphan receptor 1        | NM_005012 | 4919             | gb:NM_005012.1 /DB     |
| 128 | 206074_s_at | high mobility group AT-hook 1                          | NM_002131 | 3159             | gb:NM_002131.1 /DEI    |
| 131 | 206100_at   | carboxypeptidase M                                     | NM_001874 | 1368             | gb:NM_001874.1 /DB     |
| 134 | 206167_s_at | Rho GTPase activating protein 6                        | NM_001174 | 395              | gb:NM_001174.2 /DEI    |
| 136 | 206283_s_at | T-cell acute lymphocytic leukemia 1                    | NM_003189 | 6886             | gb:NM_003189.1 /DB     |
| 139 | 206432_at   | hyaluronan synthase 2                                  | NM_005328 | 3037             | gb:NM_005328.1 /DB     |
| 141 | 206633_at   | cholinergic receptor, nicotinic, alpha 1 (muscle       | NM_000079 | 1134             | gb:NM_000079.1 /DB     |
| 142 | 206653_at   | CDNA: FLJ21837 fis, clone HEP01664                     | BF062139  |                  | gb:BF062139 /DB_XR     |
| 143 | 206655_s_at | glycoprotein Ib (platelet), beta polypeptide ///       | NM_000407 | 2812 ///         | 541:gb:NM_000407.3 /DB |
| 145 | 206747_at   | gb:NM_014696.1 /DB_XREF=gi:7662165 /GEN                | NM_014696 |                  | gb:NM_014696.1 /DB     |
| 149 | 207046_at   | histone 2, H4 ///<br>histone H4/o ///<br>similar to ge | NM_003548 | 554313 ///<br>6: | gb:NM_003548.1 /DEI    |
| 152 | 207264_at   | KDEL (Lys-Asp-Glu-Leu) endoplasmic reticulun           | NM_016657 | 11015            | gb:NM_016657.1 /DB     |
| 153 | 207265_s_at | KDEL (Lys-Asp-Glu-Leu) endoplasmic reticulun           | NM_016657 | 11015            | gb:NM_016657.1 /DEI    |
| 159 | 207329_at   | matrix metalloproteinase 8 (neutrophil collagen        | NM_002424 | 4317             | gb:NM_002424.1 /DB     |
| 165 | 207954_at   | GATA binding protein 2                                 | NM_002050 | 2624             | gb:NM_002050.1 /DB     |
| 169 | 208176_at   | double homeobox, 1                                     | NM_012146 | 26584            | gb:NM_012146.1 /DB     |
| 170 | 208190_s_at | lipolysis stimulated lipoprotein receptor              | NM_015925 | 51599            | gb:NM_015925.1 /DB     |
| 171 | 208396_s_at | phosphodiesterase 1A, calmodulin-dependent             | NM_005019 | 5136             | gb:NM_005019.1 /DEI    |
| 172 | 208399_s_at | endothelin 3                                           | NM_000114 | 1908             | gb:NM_000114.1 /DB     |

|     |             |                                                |           |           |                        |
|-----|-------------|------------------------------------------------|-----------|-----------|------------------------|
| 173 | 208407_s_at | catenin (cadherin-associated protein), delta 1 | NM_001331 | 1500      | gb:NM_001331.1 /DB_    |
| 176 | 208690_s_at | PDZ and LIM domain 1 (elfin)                   | BC000915  | 9124      | gb:BC000915.1 /DB_>    |
| 177 | 208712_at   | cyclin D1                                      | M73554    | 595       | gb:M73554.1 /DB_XRI    |
| 178 | 208886_at   | H1 histone family, member 0                    | BC000145  | 3005      | gb:BC000145.1 /DB_>    |
| 180 | 208998_at   | uncoupling protein 2 (mitochondrial, proton ca | U94592    | 7351      | gb:U94592.1 /DB_XRI    |
| 181 | 209019_s_at | PTEN induced putative kinase 1                 | BF432478  | 65018     | gb:AF316873.1 /DEF=    |
| 182 | 209034_at   | proline-rich nuclear receptor coactivator 1    | AF279899  | 10957     | gb:AF279899.1 /DB_>    |
| 183 | 209048_s_at | protein kinase C binding protein 1             | AB032951  | 23613     | gb:AB032951.1 /DB_>    |
| 186 | 209083_at   | coronin, actin binding protein, 1A             | U34690    | 11151     | gb:U34690.1 /DB_XRI    |
| 187 | 209101_at   | connective tissue growth factor                | M92934    | 1490      | gb:M92934.1 /DEF=H     |
| 188 | 209163_at   | cytochrome b-561                               | AL514271  | 1534      | gb:AL514271 /DB_XRI    |
| 189 | 209164_s_at | cytochrome b-561                               | BC002976  | 1534      | gb:BC002976.1 /DB_>    |
| 190 | 209189_at   | v-fos FBJ murine osteosarcoma viral oncogene   | BC004490  | 2353      | gb:BC004490.1 /DB_>    |
| 191 | 209201_x_at | chemokine (C-X-C motif) receptor 4             | L01639    | 7852      | gb:L01639.1 /DB_XRE    |
| 192 | 209230_s_at | p8 protein (candidate of metastasis 1)         | AF135266  | 26471     | gb:AF135266.1 /DEF=    |
| 196 | 209335_at   | decorin                                        | BC005322  | 1634      | Consensus includes gt  |
| 197 | 209373_at   | mal, T-cell differentiation protein-like       | BC003179  | 7851      | gb:BC003179.1 /DEF=    |
| 198 | 209436_at   | spondin 1, extracellular matrix protein        | AB018305  | 10418     | Consensus includes gt  |
| 200 | 209584_x_at | apolipoprotein B mRNA editing enzyme, cataly   | AF165520  | 27350     | gb:AF165520.1 /DB_>    |
| 202 | 209803_s_at | pleckstrin homology-like domain, family A, me  | AF001294  | 7262      | gb:AF001294.1 /DB_>    |
| 204 | 209821_at   | chromosome 9 open reading frame 26 (NF-HE\     | AB024518  | 90865     | gb:AB024518.1 /DB_>    |
| 205 | 209875_s_at | secreted phosphoprotein 1 (osteopontin, bone   | M83248    | 6696      | gb:M83248.1 /DB_XRI    |
| 209 | 210171_s_at | cAMP responsive element modulator              | S68134    | 1390      | gb:S68134.1 /DB_XRI    |
| 210 | 210215_at   | transferrin receptor 2                         | AF067864  | 7036      | gb:AF067864.1 /DB_>    |
| 211 | 210222_s_at | reticulon 1                                    | BC000314  | 6252      | gb:BC000314.1 /DEF=    |
| 212 | 210301_at   | xanthine dehydrogenase                         | U06117    | 7498      | gb:U06117.1 /DB_XRI    |
| 213 | 210503_at   | melanoma antigen family A, 11                  | BC004479  | 4110      | gb:BC004479.1 /DB_>    |
| 217 | 210683_at   | neurturin                                      | AL161995  | 4902      | gb:AL161995.1 /DEF=    |
| 221 | 210883_x_at | ephrin-B3                                      | U57001    | 1949      | gb:U57001.1 /DB_XRI    |
| 222 | 210914_at   | gb:AF130071.1 /DEF=Homo sapiens clone FLB      | AF130071  |           | gb:AF130071.1 /DEF=    |
| 223 | 210964_s_at | glycogenin 2                                   | U94364    | 8908      | gb:U94364.1 /DB_XRI    |
| 226 | 211202_s_at | Jumonji, AT rich interactive domain 1B (RBP2-  | AF087481  | 10765     | gb:AF087481.1 /DEF=    |
| 230 | 211413_s_at | peptidyl arginine deiminase, type IV           | AF229067  | 23569     | gb:AF229067.1 /DB_>    |
| 231 | 211458_s_at | GABA(A) receptor-associated protein like 1 /// | AF180519  | 23710 /// | 23:gb:AF180519.1 /DB_> |
| 233 | 211600_at   | gb:U20489.1 /DB_XREF=gi:885925 /GEN=GLI        | U20489    |           | gb:U20489.1 /DB_XRI    |
| 236 | 211791_s_at | potassium voltage-gated channel, shaker-relat  | AF044253  | 8514      | gb:AF044253.1 /DB_>    |

|     |             |                                                |           |        |                               |
|-----|-------------|------------------------------------------------|-----------|--------|-------------------------------|
| 237 | 211813_x_at | decorin                                        | AF138303  | 1634   | gb:AF138303.1 /DEF=           |
| 239 | 211896_s_at | decorin                                        | AF138302  | 1634   | gb:AF138302.1 /DEF=           |
| 240 | 211919_s_at | chemokine (C-X-C motif) receptor 4 /// chemo   | AF348491  | 7852   | gb:AF348491.1 /DEF=           |
| 242 | 212070_at   | G protein-coupled receptor 56                  | AL554008  | 9289   | gb:AL554008 /DB_XR            |
| 243 | 212122_at   | ras homolog gene family, member Q /// hypotl   | AW771590  | 23433  | /// 28: gb:AW771590 /DB_XF    |
| 244 | 212134_at   | pleckstrin homology-like domain, family B, me  | AB014538  | 23187  | Consensus includes gt         |
| 247 | 212256_at   | UDP-N-acetyl-alpha-D-galactosamine:polypept    | BE906572  | 55568  | gb:BE906572 /DB_XR            |
| 249 | 212314_at   | KIAA0746 protein                               | AB018289  | 23231  | gb:AB018289.1 /DB_>           |
| 251 | 212419_at   | chromosome 10 open reading frame 56            | AA131324  | 219654 | Consensus includes gt         |
| 252 | 212713_at   | microfibrillar-associated protein 4            | R72286    | 4239   | gb:R72286 /DB_XREF            |
| 253 | 212747_at   | ankyrin repeat and sterile alpha motif domain  | AI990523  | 23294  | gb:AI990523 /DB_XRf           |
| 255 | 212909_at   | LY6/PLAUR domain containing 1                  | AL567376  | 116372 | Consensus includes gt         |
| 259 | 213182_x_at | cyclin-dependent kinase inhibitor 1C (p57, Kip | R78668    | 1028   | gb:R78668 /DB_XREF            |
| 260 | 213348_at   | Cyclin-dependent kinase inhibitor 1C (p57, Kip | N33167    | 1028   | Consensus includes gt         |
| 261 | 213358_at   | KIAA0802                                       | AB018345  | 23255  | Consensus includes gt         |
| 262 | 213496_at   | plasticity related gene 1                      | AW592563  | 9890   | gb:AW592563 /DB_XF            |
| 263 | 213675_at   | CDNA FLJ25106 fis, clone CBR01467              | W61005    |        | gb:W61005 /DB_XREF            |
| 269 | 213905_x_at | biglycan /// teashirt family zinc finger 1     | AA845258  | 10194  | /// 63: Consensus includes gt |
| 272 | 213993_at   | spondin 1, extracellular matrix protein        | AI885290  | 10418  | gb:AI885290 /DB_XRf           |
| 273 | 213994_s_at | spondin 1, extracellular matrix protein        | AI885290  | 10418  | gb:AI885290 /DB_XRf           |
| 274 | 214033_at   | similar to ATP-binding cassette, sub-family C, | AI084637  | 653770 | Consensus includes gt         |
| 277 | 214285_at   | fatty acid binding protein 3, muscle and heart | AI041520  | 2170   | Consensus includes gt         |
| 278 | 214390_s_at | branched chain aminotransferase 1, cytosolic   | AI652662  | 586    | gb:AI652662 /DB_XRf           |
| 279 | 214455_at   | histone 1, H2bc                                | NM_003526 | 8347   | Consensus includes gt         |
| 281 | 214643_x_at | bridging integrator 1                          | BG034080  | 274    | Consensus includes gt         |
| 282 | 214677_x_at | immunoglobulin lambda locus /// immunoglob     | X57812    | 28786  | /// 28: gb:X57812.1 /DB_XRf   |
| 283 | 214755_at   | UDP-N-acteylglucosamine pyrophosphorylase      | AK022632  | 91373  | gb:AK022632.1 /DB_>           |
| 284 | 214829_at   | aminoadipate-semialdehyde synthase             | AK023446  | 10157  | gb:AK023446.1 /DB_>           |
| 285 | 214841_at   | cornichon homolog 3 (Drosophila)               | AF070524  | 149111 | Consensus includes gt         |
| 287 | 215008_at   | tolloid-like 2                                 | AA582404  | 7093   | Consensus includes gt         |
| 289 | 215071_s_at | histone 1, H2ac                                | AL353759  | 8334   | Consensus includes gt         |
| 290 | 215183_at   | Clone HQ0072                                   | AF090886  |        | gb:AF090886.1 /DB_x           |
| 294 | 215645_at   | Folliculin                                     | AF090883  | 201163 | Consensus includes gt         |
| 295 | 215727_x_at | Chromodomain helicase DNA binding protein 3    | AF064839  | 1107   | Consensus includes gt         |
| 298 | 215935_at   | chromosome 9 open reading frame 36             | AL080148  | 26165  | Consensus includes gt         |
| 300 | 216041_x_at | granulin                                       | AK023348  | 2896   | Consensus includes gt         |

|     |             |                                                   |           |        |                       |
|-----|-------------|---------------------------------------------------|-----------|--------|-----------------------|
| 302 | 216149_at   | Hypothetical protein DKFZp667M2411                | AL359623  | 147172 | Consensus includes gt |
| 304 | 216236_s_at | solute carrier family 2 (facilitated glucose tran | AL110298  | 6515   | Consensus includes gt |
| 305 | 216248_s_at | nuclear receptor subfamily 4, group A, membe      | S77154    | 4929   | Consensus includes gt |
| 306 | 216252_x_at | Fas (TNF receptor superfamily, member 6)          | Z70519    | 355    | Consensus includes gt |
| 310 | 216705_s_at | adenosine deaminase                               | X02189    | 100    | Consensus includes gt |
| 313 | 216750_at   | amyloid beta (A4) precursor protein-binding, f    | AK024871  | 323    | Consensus includes gt |
| 315 | 216894_x_at | cyclin-dependent kinase inhibitor 1C (p57, Kip    | D64137    | 1028   | Consensus includes gt |
| 317 | 217028_at   | chemokine (C-X-C motif) receptor 4                | AJ224869  | 7852   | Consensus includes gt |
| 319 | 217502_at   | interferon-induced protein with tetratricopeptic  | BE888744  | 3433   | Consensus includes gt |
| 323 | 217875_s_at | transmembrane, prostate androgen induced RI       | NM_020182 | 56937  | gb:NM_020182.1 /DEI   |
| 326 | 218094_s_at | dysbindin (dystrobrevin binding protein 1) don    | NM_018478 | 55861  | gb:NM_018478.1 /DEI   |
| 327 | 218424_s_at | STEAP family member 3                             | NM_018234 | 55240  | gb:NM_018234.1 /DEI   |
| 328 | 218559_s_at | v-maf musculoaponeurotic fibrosarcoma oncog       | NM_005461 | 9935   | gb:NM_005461.1 /DEI   |
| 329 | 218574_s_at | LIM and cysteine-rich domains 1                   | NM_014583 | 29995  | gb:NM_014583.1 /DEI   |
| 330 | 218581_at   | abhydrolase domain containing 4                   | NM_022060 | 63874  | gb:NM_022060.1 /DEI   |
| 331 | 218638_s_at | spondin 2, extracellular matrix protein           | NM_012445 | 10417  | gb:NM_012445.1 /DEI   |
| 333 | 218700_s_at | RAB7, member RAS oncogene family-like 1           | NM_003929 | 8934   | gb:BC002585.1 /DEF=   |
| 334 | 218736_s_at | palmdelphin                                       | NM_017734 | 54873  | gb:NM_017734.1 /DEI   |
| 335 | 218818_at   | four and a half LIM domains 3                     | NM_004468 | 2275   | gb:NM_004468.1 /DEI   |
| 337 | 218870_at   | Rho GTPase activating protein 15                  | NM_018460 | 55843  | gb:NM_018460.1 /DEI   |
| 338 | 218876_at   | brain specific protein /// brain specific protein | NM_016140 | 51673  | gb:NM_016140.1 /DEI   |
| 339 | 218913_s_at | GEM interacting protein                           | NM_016573 | 51291  | gb:NM_016573.1 /DEI   |
| 340 | 218974_at   | hypothetical protein FLJ10159                     | NM_018013 | 55084  | gb:NM_018013.1 /DEI   |
| 341 | 219010_at   | chromosome 1 open reading frame 106               | NM_018265 | 55765  | gb:NM_018265.1 /DEI   |
| 343 | 219102_at   | reticulocalbin 3, EF-hand calcium binding dom     | NM_020650 | 57333  | gb:NM_020650.1 /DEI   |
| 344 | 219117_s_at | FK506 binding protein 11, 19 kDa                  | NM_016594 | 51303  | gb:NM_016594.1 /DEI   |
| 345 | 219118_at   | FK506 binding protein 11, 19 kDa                  | NM_016594 | 51303  | gb:NM_016594.1 /DEI   |
| 346 | 219144_at   | dual specificity phosphatase 26 (putative)        | NM_024025 | 78986  | gb:NM_024025.1 /DEI   |
| 347 | 219196_at   | secretogranin III                                 | NM_013243 | 29106  | gb:NM_013243.1 /DEI   |
| 349 | 219255_x_at | interleukin 17 receptor B                         | NM_018725 | 55540  | gb:NM_018725.1 /DEI   |
| 351 | 219327_s_at | G protein-coupled receptor, family C, group 5,    | NM_022036 | 55890  | gb:NM_022036.1 /DEI   |
| 352 | 219355_at   | hypothetical protein FLJ10178                     | NM_018015 | 55086  | gb:NM_018015.2 /DEI   |
| 358 | 219877_at   | zinc finger, matrin type 4                        | NM_024645 | 79698  | gb:NM_024645.1 /DEI   |
| 359 | 219909_at   | matrix metalloproteinase 28                       | NM_024302 | 79148  | gb:NM_024302.1 /DEI   |
| 360 | 219911_s_at | solute carrier organic anion transporter family,  | NM_016354 | 28231  | gb:NM_016354.1 /DEI   |
| 363 | 219961_s_at | chromosome 20 open reading frame 19               | NM_018474 | 55857  | gb:NM_018474.1 /DEI   |

|     |             |                                                                  |           |        |                                             |
|-----|-------------|------------------------------------------------------------------|-----------|--------|---------------------------------------------|
| 366 | 220014_at   | mesenchymal stem cell protein DSC54                              | NM_016644 | 51334  | gb:NM_016644.1 /DEI                         |
| 367 | 220066_at   | caspase recruitment domain family, member 1                      | NM_022162 | 64127  | gb:NM_022162.1 /DEI                         |
| 370 | 220301_at   | coiled-coil domain containing 102B                               | NM_024781 | 79839  | gb:NM_024781.1 /DEI                         |
| 372 | 220615_s_at | male sterility domain containing 1                               | NM_018099 | 55711  | gb:NM_018099.1 /DEI                         |
| 373 | 220675_s_at | patatin-like phospholipase domain containing 1                   | NM_025225 | 80339  | gb:NM_025225.1 /DEI                         |
| 375 | 220730_at   | hypothetical protein FLJ12986                                    | NM_025148 | 197319 | gb:NM_025148.1 /DEI                         |
| 377 | 220780_at   | phospholipase A2, group III                                      | NM_015715 | 50487  | gb:NM_015715.1 /DEI                         |
| 378 | 220786_s_at | solute carrier family 38, member 4                               | NM_018018 | 55089  | gb:NM_018018.1 /DEI                         |
| 381 | 220979_s_at | ST6 (alpha-N-acetyl-neuraminyl-2,3-beta-galactosyltransferase 6) | NM_030965 | 81849  | gb:NM_030965.1 /DEI                         |
| 384 | 221156_x_at | cell cycle progression 1                                         | NM_004748 | 9236   | gb:NM_004748.1 /DEI                         |
| 388 | 221511_x_at | cell cycle progression 1                                         | AF212228  | 9236   | Consensus includes gb:AF212228.1 /DEF=      |
| 389 | 221530_s_at | basic helix-loop-helix domain containing, class 1                | AB044088  | 79365  | Consensus includes gb:AB044088.1 /DEF=      |
| 390 | 221558_s_at | lymphoid enhancer-binding factor 1                               | AF288571  | 51176  | gb:AF288571.1 /DEF=                         |
| 391 | 221872_at   | retinoic acid receptor responder (tazarotene in vitro)           | AI669229  | 5918   | Consensus includes gb:AI669229.1 /DEF=      |
| 392 | 222025_s_at | 5-oxoprolinase (ATP-hydrolysing)                                 | AI991887  | 26873  | Consensus includes gb:AI991887.1 /DEF=      |
| 394 | 222234_s_at | dysbindin (dystrobrevin binding protein 1) domain 1              | AK022644  | 79007  | Consensus includes gb:AK022644.1 /DEF=      |
| 395 | 222279_at   | hypothetical protein FLJ35429                                    | AI669379  | 285830 | Consensus includes gb:AI669379.1 /DEF=      |
| 396 | 222293_at   | immunoglobulin superfamily, member 4C                            | AW204383  | 199731 | Consensus includes gb:AW204383.1 /DEF=      |
| 397 | 222379_at   | Transcribed locus, strongly similar to NP_5424                   | AI002715  |        | Consensus includes gb:AI002715.1 /DEF=      |
| 400 | 38290_at    | regulator of G-protein signalling 14                             | AF037195  | 10636  | Cluster Incl. AF037195                      |
| 401 | 47560_at    | latrophilin 1                                                    | AI525402  | 22859  | Cluster Incl. AI525402                      |
| 402 | 52651_at    | collagen, type VIII, alpha 2                                     | AI806793  | 1296   | Cluster Incl. AI806793                      |
| 404 | 59437_at    | chromosome 9 open reading frame 116                              | AI830563  | 138162 | Cluster Incl. AI830563                      |
| 405 | 65718_at    | G protein-coupled receptor 124                                   | AI655903  | 25960  | Cluster Incl. AI655903                      |
| 11  | 201265_at   | gb:AF119897.1 /DB_XREF=gi:7770230 /FEA=                          | AF119897  |        | gb:AF119897.1 /DB_XREF=                     |
| 15  | 201325_s_at | epithelial membrane protein 1                                    | NM_001423 | 2012   | gb:NM_001423.1 /DEI                         |
| 30  | 202283_at   | serpin peptidase inhibitor, clade F (alpha-2 antitrypsin)        | NM_002615 | 5176   | gb:NM_002615.1 /DB_XREF=                    |
| 31  | 202311_s_at | collagen, type I, alpha 1                                        | AI743621  | 1277   | gb:AI743621 /DB_XREF=                       |
| 46  | 202934_at   | hexokinase 2                                                     | AI761561  | 3099   | gb:AI761561 /DB_XREF=                       |
| 53  | 203381_s_at | apolipoprotein E                                                 | NM_000041 | 348    | Consensus includes gb:NM_000041.1 /DB_XREF= |
| 54  | 203382_s_at | apolipoprotein E                                                 | NM_000041 | 348    | gb:NM_000041.1 /DB_XREF=                    |
| 55  | 203424_s_at | insulin-like growth factor binding protein 5                     | AW157548  | 3488   | gb:AW157548 /DB_XREF=                       |
| 56  | 203426_s_at | insulin-like growth factor binding protein 5                     | M65062    | 3488   | gb:M65062.1 /DB_XREF=                       |
| 58  | 203474_at   | IQ motif containing GTPase activating protein 1                  | NM_006633 | 10788  | gb:NM_006633.1 /DB_XREF=                    |
| 62  | 203633_at   | carnitine palmitoyltransferase 1A (liver)                        | BF001714  | 1374   | gb:BF001714 /DB_XREF=                       |
| 64  | 203700_s_at | deiodinase, iodothyronine, type II                               | NM_013989 | 1734   | gb:NM_013989.1 /DB_XREF=                    |

|     |             |                                                    |           |        |                            |
|-----|-------------|----------------------------------------------------|-----------|--------|----------------------------|
| 66  | 203821_at   | heparin-binding EGF-like growth factor             | NM_001945 | 1839   | gb:NM_001945.1 /DEI        |
| 77  | 204378_at   | breast carcinoma amplified sequence 1              | NM_003657 | 8537   | gb:NM_003657.1 /DB         |
| 79  | 204430_s_at | solute carrier family 2 (facilitated glucose/fruct | NM_003039 | 6518   | gb:NM_003039.1 /DEI        |
| 88  | 204614_at   | serpin peptidase inhibitor, clade B (ovalbumin)    | NM_002575 | 5055   | gb:NM_002575.1 /DB         |
| 97  | 204904_at   | gap junction protein, alpha 4, 37kDa (connexin     | NM_002060 | 2701   | gb:NM_002060.1 /DB         |
| 98  | 205143_at   | chondroitin sulfate proteoglycan 3 (neurocan)      | NM_004386 | 1463   | gb:NM_004386.1 /DEI        |
| 104 | 205227_at   | interleukin 1 receptor accessory protein           | NM_002182 | 3556   | gb:NM_002182.1 /DEI        |
| 105 | 205230_at   | rabphilin 3A homolog (mouse)                       | NM_014954 | 22895  | gb:NM_014954.1 /DB         |
| 110 | 205344_at   | chondroitin sulfate proteoglycan 5 (neuroglyca     | NM_006574 | 10675  | gb:NM_006574.1 /DB         |
| 126 | 205815_at   | regenerating islet-derived 3 alpha                 | NM_002580 | 5068   | gb:NM_002580.1 /DB         |
| 130 | 206093_x_at | tenascin XB                                        | NM_007116 | 7148   | gb:NM_007116.1 /DB         |
| 132 | 206110_at   | histone 1, H3h                                     | NM_003536 | 8357   | gb:NM_003536.1 /DEI        |
| 135 | 206204_at   | growth factor receptor-bound protein 14            | NM_004490 | 2888   | gb:NM_004490.1 /DB         |
| 146 | 206778_at   | crystallin, beta B2                                | NM_000496 | 1415   | gb:NM_000496.1 /DB         |
| 156 | 207315_at   | CD226 molecule                                     | NM_006566 | 10666  | gb:NM_006566.1 /DB         |
| 164 | 207826_s_at | inhibitor of DNA binding 3, dominant negative      | NM_002167 | 3399   | gb:NM_002167.1 /DB         |
| 203 | 209815_at   | patched homolog (Drosophila)                       | BG054916  | 5727   | Consensus includes gt      |
| 206 | 210029_at   | indoleamine-pyrrole 2,3 dioxygenase                | M34455    | 3620   | gb:M34455.1 /DB_XRI        |
| 208 | 210102_at   | loss of heterozygosity, 11, chromosomal regio      | BC001234  | 4013   | gb:BC001234.1 /DB_>        |
| 216 | 210643_at   | tumor necrosis factor (ligand) superfamily, me     | AF053712  | 8600   | gb:AF053712.1 /DEF=        |
| 218 | 210710_at   | angiogenic factor with G patch and FHA domai       | BC002828  | 55109  | gb:BC002828.1 /DB_>        |
| 229 | 211367_s_at | caspase 1, apoptosis-related cysteine peptidas     | U13699    | 834    | gb:U13699.1 /DB_XRI        |
| 232 | 211597_s_at | homeodomain-only protein /// homeodomain-c         | AB059408  | 84525  | gb:AB059408.1 /DB_>        |
| 235 | 211618_s_at | alkaline phosphatase, intestinal /// alkaline ph   | M31008    | 248    | gb:M31008.1 /DB_XRI        |
| 241 | 212057_at   | KIAA0182                                           | AA206161  | 23199  | gb:AA206161 /DB_XR         |
| 245 | 212188_at   | potassium channel tetramerisation domain cor       | AA551075  | 115207 | gb:AA551075 /DB_XR         |
| 246 | 212192_at   | potassium channel tetramerisation domain cor       | AI718937  | 115207 | gb:AI718937 /DB_XRI        |
| 250 | 212414_s_at | septin 6 /// cytokine-like nuclear factor n-pac    | D50918    | 23157  | /// 84 gb:D50918.1 /DB_XRI |
| 254 | 212884_x_at | Translocase of outer mitochondrial membrane        | AI358867  | 10452  | Consensus includes gt      |
| 257 | 213142_x_at | hypothetical protein LOC54103                      | AV700415  | 54103  | gb:AV700415 /DB_XR         |
| 258 | 213169_at   | Clone TUA8 Cri-du-chat region mRNA                 | BG109855  |        | Consensus includes gt      |
| 264 | 213707_s_at | distal-less homeobox 5                             | NM_005221 | 1749   | gb:NM_005221.3 /DB         |
| 265 | 213756_s_at | heat shock transcription factor 1                  | AI393937  | 3297   | gb:AI393937 /DB_XRI        |
| 266 | 213823_at   | homeobox A11                                       | H94842    | 3207   | gb:H94842 /DB_XREF         |
| 267 | 213854_at   | synaptogyrin 1                                     | AJ002303  | 9145   | Consensus includes gt      |
| 268 | 213874_at   | serpin peptidase inhibitor, clade A (alpha-1 an    | NM_006215 | 5267   | gb:NM_006215.1 /DB         |



|     |             |                                                   |           |              |                        |
|-----|-------------|---------------------------------------------------|-----------|--------------|------------------------|
| 275 | 214204_at   | PARK2 co-regulated                                | BF224076  | 135138       | gb:BF224076 /DB_XR     |
| 291 | 215235_at   | Spectrin, alpha, non-erythrocytic 1 (alpha-fodr   | AL110273  | 6709         | gb:AL110273.1 /DB_X    |
| 297 | 215870_s_at | phospholipase A2, group V                         | AL158172  | 5322         | Consensus includes gt  |
| 303 | 216191_s_at | T cell receptor alpha locus /// T cell receptor d | X72501    | 6955 /// 696 | Consensus includes gt  |
| 308 | 216651_s_at | glutamate decarboxylase 2 (pancreatic islets a    | X69936    | 2572         | Consensus includes gt  |
| 318 | 217143_s_at | T cell receptor alpha locus /// T cell receptor d | X06557    | 6955 /// 696 | Consensus includes gt  |
| 325 | 218035_s_at | RNA-binding protein                               | NM_019027 | 54502        | gb:NM_019027.1 /DEI    |
| 332 | 218691_s_at | PDZ and LIM domain 4                              | NM_003687 | 8572         | gb:AF153882.1 /DEF=    |
| 361 | 219921_s_at | dedicator of cytokinesis 5                        | NM_024940 | 80005        | gb:NM_024940.1 /DEI    |
| 364 | 219992_at   | tachykinin 3 (neuromedin K, neurokinin beta)      | NM_013251 | 6866         | gb:NM_013251.1 /DEI    |
| 382 | 220984_s_at | solute carrier organic anion transporter family,  | NM_030958 | 81796        | gb:NM_030958.1 /DEI    |
| 403 | 57588_at    | solute carrier family 24 (sodium/potassium/cal    | R62432    | 57419        | Cluster Incl. R62432:y |
| 406 | 91826_at    | EPS8-like 1                                       | AI219073  | 54869        | Cluster Incl. AI219073 |
|     | 2           | 200795_at SPARC-like 1 (mast9, hevyn)             | NM_004684 | 8404         | gb:NM_004684.1 /DB_    |
|     | 6           | 201015_s_at junction plakoglobin                  | NM_021991 | 3728         | gb:NM_021991.1 /DEI    |
|     | 7           | 201124_at integrin, beta 5                        | AL048423  | 3693         | Consensus includes gt  |
| 14  | 201324_at   | epithelial membrane protein 1                     | NM_001423 | 2012         | gb:NM_001423.1 /DB_    |
| 16  | 201367_s_at | zinc finger protein 36, C3H type-like 2           | AI356398  | 678          | gb:AI356398 /DB_XRf    |
| 18  | 201427_s_at | selenoprotein P, plasma, 1                        | NM_005410 | 6414         | gb:NM_005410.1 /DB_    |
| 20  | 201596_x_at | keratin 18                                        | NM_000224 | 3875         | gb:NM_000224.1 /DEI    |
| 22  | 201694_s_at | early growth response 1                           | NM_001964 | 1958         | gb:NM_001964.1 /DB_    |
| 27  | 202242_at   | tetraspanin 7                                     | NM_004615 | 7102         | gb:NM_004615.1 /DB_    |
| 33  | 202409_at   | chromosome 11 open reading frame 43               | X07868    | 492304       | gb:X07868 /DB_XREF     |
| 36  | 202566_s_at | supervillin                                       | AF051851  | 6840         | gb:AF051851.1 /DB_X    |
| 38  | 202627_s_at | serpin peptidase inhibitor, clade E (nexin, plas  | AL574210  | 5054         | gb:AL574210 /DB_XRf    |
| 41  | 202729_s_at | latent transforming growth factor beta binding    | AI986120  | 4052         | gb:NM_000627.1 /DEI    |
| 42  | 202733_at   | procollagen-proline, 2-oxoglutarate 4-dioxyger    | NM_004199 | 8974         | gb:NM_004199.1 /DEI    |
| 45  | 202917_s_at | S100 calcium binding protein A8 (calgranulin /    | NM_002964 | 6279         | gb:NM_002964.2 /DB_    |
| 50  | 203083_at   | thrombospondin 2                                  | NM_003247 | 7058         | gb:NM_003247.1 /DB_    |
| 57  | 203471_s_at | pleckstrin                                        | NM_002664 | 5341         | gb:NM_002664.1 /DB_    |
| 67  | 203876_s_at | matrix metallopeptidase 11 (stromelysin 3)        | AI761713  | 4320         | gb:AI761713 /DB_XRf    |
| 72  | 204153_s_at | manic fringe homolog (Drosophila)                 | AI738965  | 4242         | gb:NM_002405.1 /DEI    |
| 73  | 204197_s_at | runt-related transcription factor 3               | NM_004350 | 864          | gb:NM_004350.1 /DB_    |
| 74  | 204205_at   | apolipoprotein B mRNA editing enzyme, cataly      | NM_021822 | 60489        | gb:NM_021822.1 /DB_    |
| 78  | 204420_at   | FOS-like antigen 1                                | BG251266  | 8061         | gb:BG251266 /DB_XR     |
| 83  | 204567_s_at | ATP-binding cassette, sub-family G (WHITE), r     | NM_004915 | 9619         | gb:NM_004915.2 /DEI    |

|     |             |                                                 |           |       |                            |
|-----|-------------|-------------------------------------------------|-----------|-------|----------------------------|
| 84  | 204583_x_at | kallikrein 3, (prostate specific antigen)       | U17040    | 354   | gb:U17040.1 /DEF=Hi        |
| 93  | 204743_at   | transgelin 3                                    | NM_013259 | 29114 | gb:NM_013259.1 /DEI        |
| 96  | 204896_s_at | prostaglandin E receptor 4 (subtype EP4)        | AI675173  | 5734  | gb:AI675173 /DB_XRI        |
| 101 | 205206_at   | Kallmann syndrome 1 sequence                    | NM_000216 | 3730  | gb:NM_000216.1 /DB_        |
| 107 | 205278_at   | glutamate decarboxylase 1 (brain, 67kDa)        | NM_000817 | 2571  | gb:NM_000817.1 /DB_        |
| 108 | 205311_at   | dopa decarboxylase (aromatic L-amino acid de    | NM_000790 | 1644  | gb:NM_000790.1 /DB_        |
| 109 | 205342_s_at | sulfotransferase family, cytosolic, 1C, member  | NM_001056 | 6819  | gb:AF026303.1 /DEF=        |
| 111 | 205377_s_at | acetylcholinesterase (Yt blood group)           | AI190022  | 43    | gb:AI190022 /DB_XRI        |
| 115 | 205513_at   | transcobalamin I (vitamin B12 binding protein,  | NM_001062 | 6947  | gb:NM_001062.1 /DEI        |
| 116 | 205538_at   | coronin, actin binding protein, 2A              | NM_003389 | 7464  | gb:NM_003389.1 /DB_        |
| 117 | 205552_s_at | 2',5'-oligoadenylate synthetase 1, 40/46kDa     | NM_002534 | 4938  | gb:NM_002534.1 /DB_        |
| 119 | 205609_at   | angiopoietin 1                                  | NM_001146 | 284   | gb:NM_001146.1 /DB_        |
| 123 | 205752_s_at | glutathione S-transferase M5                    | NM_000851 | 2949  | gb:NM_000851.1 /DB_        |
| 127 | 205818_at   | deleted in bladder cancer 1                     | NM_014618 | 1620  | gb:NM_014618.1 /DB_        |
| 129 | 206077_at   | Kell blood group, metalloendopeptidase          | NM_000420 | 3792  | gb:NM_000420.1 /DB_        |
| 133 | 206115_at   | early growth response 3                         | NM_004430 | 1960  | gb:NM_004430.1 /DB_        |
| 137 | 206331_at   | calcitonin receptor-like                        | NM_005795 | 10203 | gb:NM_005795.1 /DEI        |
| 140 | 206576_s_at | carcinoembryonic antigen-related cell adhesior  | NM_001712 | 634   | gb:NM_001712.1 /DB_        |
| 144 | 206730_at   | glutamate receptor, ionotropic, AMPA 3          | NM_007325 | 2892  | gb:NM_007325.1 /DEI        |
| 147 | 206834_at   | hemoglobin, delta /// hemoglobin, delta         | NM_000519 | 3045  | gb:NM_000519.2 /DB_        |
| 148 | 206935_at   | protocadherin 8                                 | NM_002590 | 5100  | gb:NM_002590.2 /DEI        |
| 150 | 207087_x_at | ankyrin 1, erythrocytic                         | NM_020478 | 286   | gb:NM_020478.1 /DB_        |
| 151 | 207235_s_at | glutamate receptor, metabotropic 5              | NM_000842 | 2915  | gb:NM_000842.1 /DEI        |
| 154 | 207282_s_at | myogenin (myogenic factor 4)                    | NM_002479 | 4656  | gb:NM_002479.1 /DEI        |
| 155 | 207299_s_at | glutamate receptor, metabotropic 1              | NM_000838 | 2911  | gb:NM_000838.2 /DB_        |
| 157 | 207321_s_at | ATP-binding cassette, sub-family B (MDR/TAP)    | NM_019625 | 23457 | gb:NM_019625.1 /DB_        |
| 158 | 207324_s_at | desmocollin 1                                   | NM_004948 | 1823  | gb:NM_004948.2 /DEI        |
| 160 | 207351_s_at | SH2 domain protein 2A                           | NM_003975 | 9047  | gb:NM_003975.1 /DEI        |
| 161 | 207448_at   | protein O-fucosyltransferase 2                  | NM_015227 | 23275 | Consensus includes gt      |
| 162 | 207637_at   | KIAA0789 gene product                           | NM_014653 | 9671  | gb:NM_014653.1 /DB_        |
| 163 | 207708_at   | arachidonate lipoxygenase 3                     | NM_021628 | 59344 | gb:NM_021628.1 /DB_        |
| 166 | 208020_s_at | calcium channel, voltage-dependent, L type, al  | NM_000719 | 775   | gb:NM_000719.1 /DB_        |
| 167 | 208032_s_at | glutamate receptor, ionotropic, AMPA 3          | NM_000828 | 2892  | gb:NM_000828.1 /DEI        |
| 168 | 208092_s_at | family with sequence similarity 49, member A    | NM_030797 | 81553 | gb:NM_030797.1 /DEI        |
| 174 | 208466_at   | RAB3D, member RAS oncogene family               | NM_004283 | 9545  | gb:NM_004283.1 /DEI        |
| 175 | 208534_s_at | RAS p21 protein activator 4 /// hypothetical pr | NM_006989 | 10156 | /// 40:gb:NM_006989.1 /DB_ |

|     |             |                                                   |           |        |                                |
|-----|-------------|---------------------------------------------------|-----------|--------|--------------------------------|
| 179 | 208937_s_at | inhibitor of DNA binding 1, dominant negative     | D13889    | 3397   | gb:D13889.1 /DEF=Hi            |
| 184 | 209071_s_at | regulator of G-protein signalling 5               | AF159570  | 8490   | gb:AF159570.1 /DB_X            |
| 185 | 209074_s_at | family with sequence similarity 107, member 4     | AF089853  | 11170  | gb:AL050264.1 /DEF=            |
| 193 | 209241_x_at | misshapen-like kinase 1 (zebrafish)               | AB041926  | 50488  | gb:AB041926.1 /DB_X            |
| 194 | 209244_s_at | kinesin family member 1C                          | BE885926  | 10749  | gb:BE885926 /DB_XR             |
| 195 | 209309_at   | alpha-2-glycoprotein 1, zinc                      | D90427    | 563    | gb:D90427.1 /DEF=Hi            |
| 201 | 209670_at   | T cell receptor alpha constant /// T cell recepto | M12959    | 28755  | gb:M12959.1 /DB_XRI            |
| 214 | 210518_at   | cadherin 8, type 2                                | AB035305  | 1006   | gb:AB035305.1 /DB_X            |
| 215 | 210545_at   | intersectin 2                                     | AF182199  | 50618  | gb:AF182199.1 /DB_X            |
| 219 | 210772_at   | formyl peptide receptor-like 1 /// formyl peptic  | M88107    | 2358   | gb:M88107.1 /DB_XRI            |
| 220 | 210784_x_at | leukocyte immunoglobulin-like receptor, subfa     | AF009634  | 10288  | /// 11(gb:AF009634.1 /DB_X     |
| 224 | 211062_s_at | carboxypeptidase Z /// carboxypeptidase Z         | BC006393  | 8532   | gb:BC006393.1 /DB_X            |
| 225 | 211167_s_at | glucokinase (hexokinase 4, maturity onset dial    | M69051    | 2645   | gb:M69051.1 /DB_XRI            |
| 227 | 211213_at   | origin recognition complex, subunit 5-like (yea   | AF081459  | 5001   | gb:AF081459.1 /DB_X            |
| 228 | 211231_x_at | cytochrome P450, family 4, subfamily A, polyp     | D13705    | 1579   | gb:D13705.1 /DEF=Hi            |
| 234 | 211616_s_at | 5-hydroxytryptamine (serotonin) receptor 2A /     | M86841    | 3356   | gb:M86841.1 /DB_XRI            |
| 238 | 211829_s_at | G protein-coupled receptor 30                     | U58828    | 2852   | gb:U58828.1 /DB_XRI            |
| 248 | 212311_at   | KIAA0746 protein                                  | AA522514  | 23231  | gb:AA522514 /DB_XR             |
| 256 | 212913_at   | mutS homolog 5 (E. coli) /// chromosome 6 of      | BE674960  | 401251 | /// 4 gb:BE674960 /DB_XR       |
| 270 | 213925_at   | Chromosome 1 open reading frame 95                | AL134612  | 375057 | Consensus includes gt          |
| 271 | 213946_s_at | obscurin-like 1                                   | AI633851  | 23363  | gb:AI633851 /DB_XRI            |
| 276 | 214284_s_at | Fibroblast growth factor 18                       | AA022949  | 8817   | Consensus includes gt          |
| 280 | 214479_at   | GDNF family receptor alpha 3                      | NM_001496 | 2676   | gb:NM_001496.1 /DB_X           |
| 286 | 214893_x_at | hyperpolarization activated cyclic nucleotide-g   | AI421964  | 610    | gb:AI421964 /DB_XRI            |
| 288 | 215048_at   | suppressor of hairy wing homolog 2 (Drosophil     | AW663885  | 140883 | gb:AW663885 /DB_XF             |
| 292 | 215351_at   | RNA terminal phosphate cyclase domain 1           | BG536504  | 8634   | Consensus includes gt          |
| 293 | 215388_s_at | complement factor H /// complement factor H-      | X56210    | 3075   | /// 3075 Consensus includes gt |
| 296 | 215806_x_at | T cell receptor gamma constant 2 /// T cell rec   | M13231    | 445347 | /// 6 Consensus includes gt    |
| 299 | 215946_x_at | similar to omega protein                          | AL022324  | 91353  | Consensus includes gt          |
| 301 | 216084_at   | hypothetical LOC389715                            | AL080137  | 389715 | Consensus includes gt          |
| 307 | 216495_x_at | Clone ds1-1 immunoglobulin lambda chain VJ        | AF043584  |        | Consensus includes gt          |
| 309 | 216683_at   | Tubulin-specific chaperone a                      | AL353949  | 6902   | Consensus includes gt          |
| 311 | 216737_at   | CDNA: FLJ20872 fis, clone ADKA02604               | AK024525  |        | Consensus includes gt          |
| 312 | 216748_at   | pyrin and HIN domain family, member 1             | AK024890  | 149628 | Consensus includes gt          |
| 314 | 216794_at   | CDNA: FLJ23203 fis, clone ADKA02487               | AK026856  |        | Consensus includes gt          |
| 316 | 217011_at   | Consensus includes gb:L11239 /DEF=Homo sa         | L11239    |        | Consensus includes gt          |

|     |             |                                                       |           |        |                             |
|-----|-------------|-------------------------------------------------------|-----------|--------|-----------------------------|
| 320 | 217642_at   | ring finger protein 40                                | AI379492  | 9810   | Consensus includes gt       |
| 321 | 217672_x_at | Consensus includes gb:BF114906 /FEA=EST /I            | BF114906  |        | Consensus includes gt       |
| 322 | 217693_x_at | Similar to RIKEN cDNA A730055C05 gene                 | AW469555  | 388335 | Consensus includes gt       |
| 324 | 218002_s_at | chemokine (C-X-C motif) ligand 14                     | AF144103  | 9547   | gb:NM_004887.1 /DEI         |
| 336 | 218835_at   | surfactant, pulmonary-associated protein A2           | NM_006926 | 6436   | /// 644 gb:NM_006926.1 /DEI |
| 342 | 219054_at   | chromosome 5 open reading frame 23                    | NM_024563 | 79614  | gb:NM_024563.1 /DEI         |
| 348 | 219202_at   | rhomboid 5 homolog 2 (Drosophila)                     | NM_024599 | 79651  | gb:NM_024599.1 /DEI         |
| 350 | 219263_at   | ring finger protein 128                               | NM_024539 | 79589  | gb:NM_024539.1 /DEI         |
| 353 | 219364_at   | likely ortholog of mouse D11lgp2                      | NM_024119 | 79132  | gb:NM_024119.1 /DEI         |
| 354 | 219368_at   | nucleosome assembly protein 1-like 2                  | NM_021963 | 4674   | gb:NM_021963.1 /DEI         |
| 355 | 219464_at   | carbonic anhydrase XIV                                | NM_012113 | 23632  | gb:NM_012113.1 /DEI         |
| 356 | 219614_s_at | solute carrier family 6 (proline IMINO transpor       | NM_020208 | 54716  | gb:NM_020208.1 /DEI         |
| 357 | 219647_at   | popeye domain containing 2                            | NM_022135 | 64091  | gb:NM_022135.1 /DEI         |
| 362 | 219956_at   | UDP-N-acetyl-alpha-D-galactosamine:polypept           | NM_007210 | 11226  | gb:NM_007210.2 /DEI         |
| 365 | 220002_at   | kinesin family member 26B                             | NM_018012 | 55083  | gb:NM_018012.1 /DEI         |
| 368 | 220067_at   | spectrin, beta, non-erythrocytic 5                    | NM_016642 | 51332  | gb:NM_016642.1 /DEI         |
| 369 | 220193_at   | chromosome 1 open reading frame 113                   | NM_024676 | 79729  | gb:NM_024676.1 /DEI         |
| 371 | 220438_at   | glutaminyl-peptide cyclotransferase-like              | NM_017659 | 54814  | gb:NM_017659.1 /DEI         |
| 374 | 220727_at   | potassium channel, subfamily K, member 10             | NM_021161 | 54207  | gb:NM_021161.1 /DEI         |
| 376 | 220759_at   | family with sequence similarity 12, member B          | NM_022360 | 64184  | gb:NM_022360.1 /DEI         |
| 379 | 220854_at   | hypothetical protein LOC642733                        | NM_014123 | 642733 | gb:NM_014123.1 /DEI         |
| 380 | 220899_at   | gb:NM_024973.1 /DEF=Homo sapiens hypothε              | NM_024973 |        | gb:NM_024973.1 /DEI         |
| 383 | 221107_at   | cholinergic receptor, nicotinic, alpha 9              | NM_017581 | 55584  | gb:NM_017581.1 /DEI         |
| 385 | 221324_at   | taste receptor, type 2, member 1                      | NM_019599 | 50834  | gb:NM_019599.1 /DEI         |
| 386 | 221433_at   | fibroblast growth factor 21                           | NM_019113 | 26291  | gb:NM_019113.1 /DEI         |
| 387 | 221441_at   | goosecoid-like                                        | NM_005315 | 2928   | gb:NM_005315.1 /DEI         |
| 398 | 33304_at    | interferon stimulated exonuclease gene 20kDa          | U88964    | 3669   | Cluster Incl. U88964:       |
| 399 | 38037_at    | heparin-binding EGF-like growth factor                | M60278    | 1839   | Cluster Incl. M60278:       |
| 407 | \$          | 406 genes satisfied the comparison filtering criteria |           |        |                             |

| or B/E> | Use             | E-B> | or B-E> | P value <= | P call % of B | and P call % (Pair | P value <= |
|---------|-----------------|------|---------|------------|---------------|--------------------|------------|
|         | 1.5 Lower Bound | 20   | 20      | NA         | NA            | NA                 | NA         |
|         | 1.5 Lower Bound | 20   | 20      | NA         | NA            | NA                 | NA         |
|         | 1.5 Lower Bound | 20   | 20      | 0.1        | NA            | NA                 | NA         |
|         | 1.5 Lower Bound | 20   | 20      | 0.1        | NA            | NA                 | NA         |
|         | 1.5 Lower Bound | 20   | 20      | 0.1        | NA            | NA                 | NA         |
|         | 1.5 Lower Bound | 20   | 20      | 0.1        | NA            | NA                 | NA         |

| DMSOA70 | DMSOB70 | baseline mea | baseline mea | LDE225A70 | LDE225B70 | experiment r | experiment r | fold change |
|---------|---------|--------------|--------------|-----------|-----------|--------------|--------------|-------------|
| 400.58  | 442.68  | 423.25       | 22.87        | 556.87    | 442.81    | 499.11       | 59.05        | 1.18        |
| 631.61  | 675.45  | 653.35       | 24.68        | 652.82    | 633.15    | 642.03       | 19.81        | -1.02       |
| 617.97  | 695.64  | 657.45       | 40.83        | 576.85    | 637.56    | 609.89       | 36.4         | -1.08       |
| 363.33  | 372.7   | 366.48       | 15.93        | 367.11    | 330.75    | 348.37       | 25.67        | -1.05       |
| 1172.01 | 1322.43 | 1245.5       | 77.4         | 1202.33   | 1355.6    | 1275.71      | 84.42        | 1.02        |
| 110.89  | 139.6   | 125.11       | 15.31        | 70.62     | 103.67    | 86.53        | 18.6         | -1.45       |
| 1096.02 | 1217.08 | 1159.52      | 73.07        | 1137.13   | 1274.48   | 1203.36      | 84.64        | 1.04        |
| 515.18  | 634.2   | 574.71       | 62.48        | 474.12    | 517.5     | 495.69       | 31.89        | -1.16       |
| 354.32  | 506.15  | 431.4        | 77.87        | 421.27    | 434.72    | 427.64       | 33.79        | -1.01       |
| 893.02  | 1191.99 | 1041.66      | 151.83       | 954.69    | 1017.22   | 983.53       | 59.12        | -1.06       |
| 3101.86 | 2752.62 | 2926.87      | 181.59       | 2375.26   | 2388.27   | 2380.77      | 60.62        | -1.23       |
| 1039.1  | 1060.35 | 1051.34      | 21.68        | 1063.64   | 995.53    | 1035.87      | 45.95        | -1.01       |
| 336.27  | 402.96  | 369.18       | 34.58        | 401.35    | 403.52    | 402.67       | 13.64        | 1.09        |
| 760.88  | 807.81  | 782.49       | 27.93        | 781.05    | 871.17    | 826.03       | 49.14        | 1.06        |
| 908.62  | 1026.78 | 966.17       | 67.8         | 784.42    | 926.53    | 859.37       | 76.73        | -1.12       |
| 1425.62 | 1476.09 | 1452.52      | 46.27        | 1450.23   | 1307.85   | 1386.08      | 90.15        | -1.05       |
| 278.29  | 256.4   | 268.43       | 19.4         | 203.97    | 210.64    | 206.93       | 9.86         | -1.3        |
| 60.98   | 60.7    | 60.84        | 14.05        | 95.34     | 85.46     | 90.5         | 19.45        | 1.49        |

|         |         |         |        |         |         |         |        |       |
|---------|---------|---------|--------|---------|---------|---------|--------|-------|
| 1055.37 | 1203.55 | 1133.04 | 77.04  | 795.51  | 1008.95 | 903.12  | 114.64 | -1.25 |
| 308.02  | 289.41  | 298.97  | 17.58  | 353.67  | 270.55  | 311.75  | 43.51  | 1.04  |
| 19.4    | 23.16   | 20.82   | 3.75   | 41.69   | 27.72   | 35.7    | 9.99   | 1.71  |
| 3164.95 | 3174.63 | 3171.38 | 76.68  | 2367.7  | 2786.76 | 2576.73 | 214.24 | -1.23 |
| 247.29  | 283.17  | 263.81  | 22.74  | 240.9   | 264.04  | 251.5   | 20.87  | -1.05 |
| 95.19   | 89.74   | 93.38   | 7.21   | 82.88   | 55.39   | 68.74   | 15.06  | -1.36 |
| 399.13  | 469.53  | 431.37  | 49.77  | 412.93  | 439.07  | 424.48  | 48.38  | -1.02 |
| 4310.71 | 4464    | 4388.22 | 102.33 | 4426.83 | 4614.15 | 4546.54 | 175.35 | 1.04  |
| 699.72  | 766.61  | 733.63  | 44.91  | 777.77  | 797.23  | 788.82  | 32.06  | 1.08  |
| 532.74  | 679.17  | 605.2   | 73.9   | 694.83  | 623.7   | 658.42  | 38.3   | 1.09  |
| 332.73  | 404.8   | 367.77  | 37.34  | 354.49  | 359.14  | 356.81  | 18.66  | -1.03 |
| 356.71  | 393.73  | 376.32  | 21.43  | 309.71  | 398.8   | 354.29  | 46.92  | -1.06 |
| 390.53  | 371.98  | 384.27  | 17.35  | 431.71  | 341.02  | 385.33  | 50.85  | 1     |
| 2334.47 | 2806.73 | 2571.04 | 243.53 | 2042.88 | 2460.56 | 2247.94 | 215.87 | -1.14 |
| 868.27  | 762.87  | 815.37  | 56.01  | 838.92  | 812     | 825.33  | 24.35  | 1.01  |
| 774.64  | 759.93  | 767.96  | 18.65  | 676.26  | 689.86  | 682.71  | 25.64  | -1.12 |
| 257.65  | 231.91  | 245.21  | 22.75  | 319.45  | 223.14  | 271.57  | 52.15  | 1.11  |
| 579.41  | 483.63  | 532.99  | 53.74  | 386.84  | 378.47  | 382.68  | 14.34  | -1.39 |
| 747.12  | 813.24  | 781.99  | 41.12  | 574.95  | 693.87  | 635.76  | 66.95  | -1.23 |
| 543.79  | 544.73  | 544.35  | 12.21  | 379.15  | 439.01  | 408.14  | 33.36  | -1.33 |
| 240.37  | 241.22  | 240.82  | 11.93  | 461.5   | 367.09  | 412.92  | 59.15  | 1.71  |
| 270.58  | 279.35  | 274.62  | 12.37  | 304.82  | 256.14  | 280.84  | 27.12  | 1.02  |
| 6.31    | 2.72    | 4.32    | 2.18   | 18.32   | 12.11   | 14.86   | 4.91   | 3.44  |
| 262.44  | 255.37  | 259.8   | 8.33   | 306.62  | 266.91  | 287.43  | 21.68  | 1.11  |
| 1461.89 | 1479.53 | 1471.01 | 34.19  | 1635.44 | 1525.88 | 1581.93 | 66.34  | 1.08  |
| 507.55  | 583.11  | 545.75  | 39.99  | 371.32  | 448.72  | 405.7   | 45.89  | -1.35 |
| 142.53  | 141.17  | 141.8   | 8.62   | 179.4   | 122.13  | 150.5   | 29.9   | 1.06  |
| 269.02  | 294.12  | 281.73  | 13.68  | 193.85  | 228.05  | 211.52  | 18.65  | -1.33 |
| 186.38  | 217.15  | 202.5   | 26.64  | 149.5   | 164.36  | 158.69  | 20.64  | -1.28 |
| 19.84   | 28.78   | 24.28   | 5.86   | 49.38   | 46.62   | 47.85   | 5.01   | 1.97  |
| 729.85  | 760.26  | 746.61  | 35.33  | 851.55  | 688.17  | 768.7   | 89.42  | 1.03  |
| 93.82   | 108.46  | 101.17  | 8.72   | 88.62   | 77.32   | 82.57   | 7.48   | -1.23 |
| 132.7   | 133.83  | 133.44  | 6.1    | 143.93  | 136.58  | 139.02  | 11.22  | 1.04  |
| 467.71  | 450.38  | 458.51  | 16.09  | 355.02  | 408.62  | 383.43  | 31.75  | -1.2  |
| 499.56  | 482.99  | 493.6   | 15.79  | 390.48  | 443.78  | 415.76  | 29.61  | -1.19 |
| 459.94  | 514.65  | 487.36  | 28.36  | 609.04  | 551.05  | 579.6   | 34.87  | 1.19  |

|         |         |         |        |         |         |         |        |       |
|---------|---------|---------|--------|---------|---------|---------|--------|-------|
| 103.77  | 136.36  | 119.48  | 18.82  | 131.57  | 116.17  | 123.74  | 15.1   | 1.04  |
| 2394.11 | 3023.73 | 2705.82 | 342.79 | 2413.92 | 3426.87 | 2908.82 | 530.59 | 1.08  |
| 290.14  | 287.03  | 288.53  | 10.61  | 273.98  | 294.8   | 284.53  | 15.99  | -1.01 |
| 186.67  | 192.37  | 188.82  | 8.99   | 127.5   | 146.9   | 136.47  | 14.4   | -1.38 |
| 202.93  | 230.83  | 215.49  | 17.48  | 149.65  | 206.53  | 177.58  | 29.93  | -1.21 |
| 6884.42 | 6667.52 | 6762.95 | 149.71 | 5251.86 | 5872.06 | 5560.57 | 325.37 | -1.22 |
| 5981.73 | 5671.05 | 5816.73 | 186.34 | 4763.35 | 5289.29 | 5042.1  | 279.56 | -1.15 |
| 33.17   | 25.57   | 28.83   | 6.13   | 28.18   | 31.47   | 29.23   | 3.99   | 1.01  |
| 9.31    | 18.61   | 14.23   | 5.34   | 18.36   | 15.19   | 17.08   | 4.1    | 1.2   |
| 588.56  | 659.72  | 625.21  | 37.64  | 474.28  | 543.09  | 508.86  | 34.76  | -1.23 |
| 155.2   | 176.79  | 165.91  | 13.26  | 71.03   | 100.74  | 86      | 15.11  | -1.93 |
| 3172.31 | 2799.22 | 2985.37 | 199.9  | 2116.84 | 2077.76 | 2097.32 | 66.75  | -1.42 |
| 177.03  | 190.3   | 184.77  | 11.53  | 104.33  | 159.04  | 131.46  | 28.21  | -1.41 |
| 407.66  | 422.06  | 415.98  | 13.72  | 301.47  | 399.91  | 350.36  | 50.2   | -1.19 |
| 500.5   | 629.42  | 565.04  | 64.94  | 749.26  | 819.13  | 795.5   | 50.78  | 1.41  |
| 43.27   | 47.96   | 46.01   | 5.05   | 31.6    | 26.61   | 28.33   | 5.13   | -1.62 |
| 1040.51 | 1072.73 | 1055.77 | 25.34  | 1129.76 | 1210.12 | 1171.22 | 44.48  | 1.11  |
| 62.88   | 62.56   | 62.7    | 6.09   | 68.87   | 43.14   | 55.88   | 14.05  | -1.12 |
| 1536.86 | 1668.23 | 1603.87 | 74.45  | 1487.77 | 1788.72 | 1636.13 | 160.85 | 1.02  |
| 45.68   | 36.66   | 41.03   | 5.96   | 19.4    | 19.19   | 19.31   | 3      | -2.12 |
| 131.39  | 115.27  | 124.34  | 11.11  | 64.08   | 63      | 63.46   | 5.66   | -1.96 |
| 251.97  | 242.26  | 246.97  | 10.96  | 258.61  | 218.38  | 237.82  | 22.04  | -1.04 |
| 164.26  | 141.72  | 153.34  | 16.06  | 114.02  | 104.79  | 108.94  | 15.34  | -1.41 |
| 148.94  | 189.87  | 169.31  | 22.74  | 178.98  | 196.65  | 188.6   | 11.05  | 1.11  |
| 384.66  | 426.13  | 404.69  | 23.54  | 287.42  | 327.2   | 309.02  | 26.64  | -1.31 |
| 269.2   | 272.41  | 270.96  | 17.32  | 299.81  | 213.93  | 255.89  | 46.19  | -1.06 |
| 21.17   | 14.28   | 18.31   | 5.11   | 25.71   | 39.64   | 32.98   | 7.53   | 1.8   |
| 42.13   | 64.02   | 52.69   | 12.75  | 61.21   | 35.31   | 47.99   | 16.4   | -1.1  |
| 32.46   | 30.15   | 31.21   | 4.38   | 32.91   | 20.54   | 26.33   | 7.63   | -1.19 |
| 612.56  | 666.1   | 639.3   | 31.07  | 736.85  | 618.9   | 673.38  | 69.71  | 1.05  |
| 19.7    | 21.2    | 20.37   | 2.17   | 9.25    | 34.94   | 22.05   | 13.06  | 1.08  |
| 42.24   | 46.1    | 44.43   | 7.03   | 66      | 55.3    | 60.79   | 8.33   | 1.37  |
| 12.16   | 10.27   | 11.4    | 5.08   | 8.47    | 24.41   | 16.12   | 9.48   | 1.41  |
| 43.21   | 47.09   | 44.64   | 4.81   | 26.66   | 37.68   | 32.47   | 6.79   | -1.38 |
| 109.9   | 108.73  | 109.23  | 6.26   | 66.11   | 84.22   | 75.49   | 9.86   | -1.45 |
| 331.58  | 255.8   | 293.47  | 39.34  | 340.32  | 256.85  | 300.03  | 45.39  | 1.02  |

|         |         |         |        |         |         |         |        |       |
|---------|---------|---------|--------|---------|---------|---------|--------|-------|
| 347.51  | 402.21  | 375.06  | 29.27  | 400.18  | 381.37  | 391.61  | 15.2   | 1.04  |
| 502.03  | 436.93  | 468.61  | 41.24  | 431.63  | 376.19  | 403.43  | 33.68  | -1.16 |
| 1119.74 | 1094.8  | 1106.8  | 44.63  | 763.34  | 860.55  | 817.36  | 103.52 | -1.35 |
| 1488.83 | 1530.57 | 1510.57 | 42.02  | 1432.72 | 1780.15 | 1608.78 | 179.37 | 1.07  |
| 2096.77 | 2090.8  | 2093.23 | 36.95  | 2297.75 | 2591.51 | 2449.07 | 152.35 | 1.17  |
| 362.71  | 363.67  | 363.16  | 10.85  | 343.45  | 396.17  | 369.8   | 35.08  | 1.02  |
| 538.49  | 561.76  | 548.01  | 24.04  | 532.67  | 554.15  | 542.25  | 31.61  | -1.01 |
| 1436.61 | 1466.58 | 1453.53 | 37.55  | 1347.29 | 1397.42 | 1379.36 | 45.09  | -1.05 |
| 158.45  | 175.26  | 167.04  | 12.95  | 168.48  | 142.36  | 153.11  | 19.56  | -1.09 |
| 429.03  | 338.73  | 383.66  | 49.92  | 380     | 277.22  | 327.55  | 56.42  | -1.17 |
| 939.65  | 963.78  | 951.04  | 22.38  | 752.89  | 899.39  | 829.06  | 75.49  | -1.15 |
| 502.91  | 542.89  | 523.53  | 25.62  | 421.73  | 450.37  | 434.85  | 22.89  | -1.2  |
| 109.97  | 109.54  | 109.8   | 11.94  | 150.16  | 111.12  | 129.24  | 24.23  | 1.18  |
| 1646.77 | 1487.86 | 1565.21 | 90.33  | 1173.9  | 1276.57 | 1229.54 | 77.08  | -1.27 |
| 240.19  | 248.92  | 245.5   | 12.84  | 295.85  | 322.96  | 310     | 17.76  | 1.26  |
| 492.39  | 506.87  | 501.38  | 14.05  | 306.36  | 406.62  | 356.47  | 50.52  | -1.41 |
| 207.33  | 270.31  | 239.15  | 32.5   | 199.84  | 228.75  | 215.24  | 15.87  | -1.11 |
| 589.19  | 579.28  | 584.84  | 14.94  | 563.06  | 647.51  | 606.19  | 49.82  | 1.04  |
| 109.85  | 119.37  | 116.55  | 12.35  | 101.36  | 141.42  | 121.61  | 23.52  | 1.04  |
| 403.28  | 357.68  | 380.47  | 25.62  | 535.75  | 364.43  | 448.98  | 88.66  | 1.18  |
| 442.54  | 406.51  | 422.03  | 22.67  | 341.79  | 326.12  | 332.66  | 15.14  | -1.27 |
| 2911.29 | 3817.99 | 3352.34 | 510.52 | 1931.74 | 2860.38 | 2388.85 | 500.75 | -1.4  |
| 28.22   | 35.92   | 31.65   | 4.48   | 17.47   | 25.53   | 21.78   | 4.36   | -1.45 |
| 95.34   | 85.53   | 90.2    | 6.77   | 74.67   | 53.93   | 64.12   | 11.85  | -1.41 |
| 203.92  | 218.23  | 211.27  | 14.35  | 185.11  | 161.67  | 174.77  | 16.51  | -1.21 |
| 63.16   | 53.61   | 58.74   | 6.77   | 100.03  | 90.33   | 94.58   | 7.54   | 1.61  |
| 178.08  | 173.61  | 176.04  | 5.8    | 129.25  | 146.25  | 137.62  | 10.96  | -1.28 |
| 50.17   | 51.78   | 50.98   | 4.02   | 89.26   | 26.79   | 57.57   | 32.42  | 1.13  |
| 114.17  | 116.59  | 115.33  | 4.37   | 136.37  | 155.06  | 145.71  | 12.02  | 1.26  |
| 2.83    | 2.64    | 2.71    | 3.71   | 12.21   | 18.8    | 15.01   | 5.04   | 5.54  |
| 127.34  | 123.91  | 125.6   | 7.78   | 112.85  | 96.27   | 103.58  | 13.1   | -1.21 |
| 290.16  | 302.53  | 296.67  | 12.36  | 342.94  | 326.23  | 334.3   | 23.25  | 1.13  |
| 12.8    | 6.93    | 9.35    | 4.41   | 31.57   | 36.44   | 33.73   | 4.47   | 3.61  |
| 350.31  | 351.99  | 351.14  | 8.55   | 521.93  | 433.8   | 478.14  | 45.97  | 1.36  |
| 1533.24 | 1746.29 | 1640.26 | 116.41 | 2371.34 | 2579.93 | 2475.03 | 124.22 | 1.51  |
| 43.3    | 38.75   | 40.82   | 4.97   | 40.47   | 21.12   | 30.52   | 10.71  | -1.34 |



|         |         |         |        |         |         |         |        |       |
|---------|---------|---------|--------|---------|---------|---------|--------|-------|
| 2205.41 | 2410.28 | 2317.35 | 109.44 | 1625.37 | 2110.53 | 1872.04 | 247.23 | -1.24 |
| 2213.18 | 2205.45 | 2210.4  | 64.1   | 1852.75 | 2100.03 | 1978.65 | 125.05 | -1.12 |
| 1640.81 | 1447.87 | 1541.2  | 108.2  | 1151.59 | 1195.92 | 1172.05 | 35.83  | -1.31 |
| 3764.94 | 3827.43 | 3802.2  | 173.07 | 3506.36 | 3790.1  | 3633.53 | 195.47 | -1.05 |
| 308.89  | 269.89  | 289.23  | 21.19  | 216.76  | 184.44  | 200.76  | 18.35  | -1.44 |
| 307.58  | 299.09  | 302.61  | 16.07  | 320.15  | 367.92  | 344.74  | 27.34  | 1.14  |
| 395.92  | 424.74  | 411.02  | 19.93  | 389.94  | 412.21  | 401.49  | 20.67  | -1.02 |
| 439.95  | 316.84  | 377.33  | 65.75  | 467.36  | 350.46  | 410.66  | 62.14  | 1.09  |
| 719.93  | 762.45  | 740.61  | 31.3   | 906.48  | 776.05  | 840.77  | 73.53  | 1.14  |
| 325.94  | 376.7   | 349.88  | 30.76  | 363.83  | 394.87  | 380.05  | 18.2   | 1.09  |
| 1119.15 | 950.29  | 1032.04 | 91.16  | 1709.57 | 1093.33 | 1400.68 | 313.91 | 1.36  |
| 245.12  | 292.71  | 268.93  | 25.66  | 117.9   | 173.96  | 146.77  | 29.09  | -1.83 |
| 630.82  | 645.55  | 639.71  | 13.6   | 779.95  | 579.92  | 679.94  | 101.67 | 1.06  |
| 654.54  | 623.98  | 639.18  | 22.08  | 639.69  | 596.14  | 615.43  | 31.55  | -1.04 |
| 252.98  | 237.86  | 245.06  | 12.56  | 250.35  | 235.13  | 242.86  | 17.3   | -1.01 |
| 718.61  | 753.49  | 736.94  | 20.87  | 600.82  | 662.05  | 631.21  | 32.11  | -1.17 |
| 440.44  | 465.45  | 453.13  | 15.81  | 355.2   | 486.19  | 420.06  | 67.44  | -1.08 |
| 385.43  | 467.95  | 427     | 41.61  | 443.14  | 430.8   | 436.49  | 13.86  | 1.02  |
| 129.47  | 125.14  | 126.7   | 10.37  | 135.57  | 135.12  | 135.37  | 5.25   | 1.07  |
| 587.39  | 556.59  | 570.25  | 23.74  | 604.1   | 690.61  | 647.88  | 43.21  | 1.14  |
| 318.74  | 323.53  | 320.76  | 14.91  | 360.51  | 326.23  | 343.99  | 25.9   | 1.07  |
| 215.9   | 258.62  | 237.26  | 22.09  | 326.13  | 352.54  | 339.76  | 14.49  | 1.43  |
| 261.62  | 246.59  | 253.66  | 13.75  | 278.52  | 242.26  | 260.99  | 22.35  | 1.03  |
| 37.53   | 35.3    | 36.44   | 3.01   | 24.79   | 36.63   | 30.75   | 6.76   | -1.19 |
| 64.72   | 64.18   | 64.46   | 3.31   | 45.81   | 35.44   | 39.93   | 7.19   | -1.61 |
| 24.02   | 26.09   | 25.11   | 3.17   | 4.65    | 3.6     | 3.86    | 2.25   | -6.5  |
| 74.49   | 85.13   | 81.06   | 8.27   | 77.22   | 77.92   | 77.57   | 5.95   | -1.04 |
| 136.46  | 161.55  | 148.19  | 13.67  | 209.08  | 209.94  | 209.53  | 12.62  | 1.41  |
| 471.92  | 592.75  | 531.6   | 63.48  | 343.32  | 440.79  | 390.53  | 52.24  | -1.36 |
| 15.23   | 22.01   | 19.85   | 8.64   | 22.75   | 38.82   | 30.74   | 8.28   | 1.55  |
| 177.61  | 280.47  | 228.04  | 52.58  | 126.76  | 207.21  | 167.13  | 41.49  | -1.36 |
| 29.02   | 30.92   | 30.22   | 3.23   | 32.07   | 31.67   | 31.92   | 2.57   | 1.06  |
| 49.92   | 53.7    | 51.3    | 4.8    | 51.98   | 45.82   | 49.3    | 6.22   | -1.04 |
| 29.35   | 23.44   | 26.19   | 3.82   | 32.66   | 20.5    | 25.79   | 7.69   | -1.02 |
| 7.67    | 16.47   | 12.29   | 5.45   | 25.74   | 31.87   | 28.92   | 3.95   | 2.35  |
| 1096.36 | 1216.03 | 1156.78 | 70.6   | 1125.48 | 1300.2  | 1212.81 | 100.87 | 1.05  |

|         |         |         |        |         |         |         |        |       |
|---------|---------|---------|--------|---------|---------|---------|--------|-------|
| 44.29   | 37.67   | 40.65   | 4.3    | 50.67   | 44.3    | 47.36   | 5.26   | 1.17  |
| 635.3   | 715.21  | 675.59  | 41.61  | 667.07  | 710.35  | 686.94  | 28     | 1.02  |
| 42.11   | 40.28   | 41.24   | 4.31   | 53.72   | 46.71   | 51.01   | 6.64   | 1.24  |
| 129.31  | 113.84  | 121.36  | 9.82   | 84.46   | 93.93   | 90.11   | 6.86   | -1.35 |
| 239.89  | 247.75  | 242.33  | 9.75   | 328.14  | 318.8   | 324.25  | 9.88   | 1.34  |
| 12.04   | 16.2    | 13.83   | 3.89   | 29.03   | 22.23   | 25.59   | 4.57   | 1.85  |
| 899.8   | 885.96  | 890.89  | 20.37  | 1034.95 | 921.89  | 978.99  | 57.96  | 1.1   |
| 3803.97 | 3376.66 | 3593.62 | 229.87 | 2744.85 | 2687.4  | 2713.31 | 96.54  | -1.32 |
| 145.57  | 129.86  | 138.7   | 12.1   | 80.69   | 131     | 105.7   | 25.46  | -1.31 |
| 250.01  | 239.52  | 245.81  | 13.01  | 216.12  | 203.14  | 209.59  | 13.68  | -1.17 |
| 556.64  | 599.33  | 576.63  | 29.01  | 472.15  | 614.5   | 540.5   | 77.93  | -1.07 |
| 496.71  | 505.9   | 499.72  | 15.94  | 491.97  | 572.09  | 535.07  | 44.19  | 1.07  |
| 47.76   | 51.36   | 49.21   | 8.73   | 69.62   | 34.34   | 51.13   | 20.58  | 1.04  |
| 83.68   | 87.81   | 85.7    | 9.03   | 52.55   | 57.86   | 55.13   | 11.98  | -1.55 |
| 592.13  | 603     | 596.62  | 17.35  | 562.79  | 704.6   | 633.18  | 72.61  | 1.06  |
| 389.18  | 431.94  | 410.63  | 23.52  | 260.88  | 363.97  | 311.88  | 53.33  | -1.32 |
| 719.38  | 643.77  | 682.64  | 42.97  | 533.62  | 550.69  | 542.04  | 23.09  | -1.26 |
| 302.84  | 356.46  | 329.96  | 27.37  | 228.98  | 240.7   | 235.26  | 8.16   | -1.4  |
| 121.49  | 118.53  | 119.77  | 8.11   | 111.6   | 114.59  | 112.85  | 9.45   | -1.06 |
| 83.89   | 69.03   | 76.54   | 8.81   | 31.57   | 41.28   | 37.65   | 8.29   | -2.03 |
| 283.23  | 359.92  | 321.53  | 39.61  | 258.55  | 298.21  | 278.54  | 21.66  | -1.15 |
| 76.32   | 86.44   | 80.88   | 7.23   | 91.89   | 59.27   | 75.7    | 18     | -1.07 |
| 1338.51 | 1414.01 | 1376    | 44.3   | 1366.33 | 1594.16 | 1479.37 | 115.29 | 1.08  |
| 612.19  | 597.64  | 605.36  | 19.42  | 467.23  | 465.94  | 466.71  | 26.53  | -1.3  |
| 246.56  | 224.73  | 236.12  | 16.73  | 213.96  | 194.27  | 203.31  | 13.17  | -1.16 |
| 1342.21 | 1452.15 | 1397.64 | 59.09  | 1595.62 | 1540.83 | 1567.53 | 35.76  | 1.12  |
| 484.45  | 486.29  | 485.42  | 18.46  | 495.67  | 464.49  | 479.56  | 24.6   | -1.01 |
| 613.85  | 603.69  | 609     | 15.47  | 432.4   | 518.22  | 473.58  | 44.95  | -1.29 |
| 40.16   | 66.08   | 52.68   | 13.58  | 17.27   | 57.26   | 37.03   | 20.35  | -1.42 |
| 255.33  | 259.83  | 257.19  | 10.18  | 263.65  | 228.1   | 246.25  | 21.06  | -1.04 |
| 40.17   | 29.85   | 35.11   | 6.62   | 91.8    | 54.25   | 73.09   | 19.36  | 2.08  |
| 168.84  | 162.45  | 165.39  | 9.2    | 197.77  | 184.94  | 192.18  | 11.56  | 1.16  |
| 268.94  | 294     | 281.17  | 17.4   | 222.15  | 230.9   | 226.8   | 19.57  | -1.24 |
| 176.36  | 146.01  | 162.23  | 18.34  | 120.04  | 105.26  | 112.09  | 11.4   | -1.45 |
| 409.36  | 417.94  | 415.08  | 15.57  | 491.46  | 375.62  | 434.81  | 63.24  | 1.05  |
| 164.28  | 174.38  | 169.65  | 10.35  | 187.84  | 188.23  | 188.02  | 12.62  | 1.11  |

|         |        |         |       |         |         |         |        |       |
|---------|--------|---------|-------|---------|---------|---------|--------|-------|
| 150.95  | 179.82 | 165.33  | 16.03 | 144.54  | 124.25  | 135.14  | 12.59  | -1.22 |
| 97.97   | 85.24  | 91.11   | 9.11  | 104.98  | 86.78   | 96.27   | 10.3   | 1.06  |
| 118.41  | 153.89 | 136.54  | 18.97 | 76.13   | 99.18   | 87.79   | 16.29  | -1.56 |
| 134.17  | 165.62 | 149.58  | 18.13 | 123.23  | 141.53  | 130.66  | 15.93  | -1.14 |
| 60.99   | 75.29  | 67.44   | 10.06 | 103.42  | 102.18  | 102.65  | 9.69   | 1.52  |
| 27.39   | 32.02  | 29.7    | 3.85  | 47.04   | 49.11   | 48.35   | 5.73   | 1.63  |
| 361.08  | 402.97 | 383.92  | 27.86 | 548.29  | 480.06  | 514.19  | 37.66  | 1.34  |
| 289.11  | 223.17 | 255.82  | 34.12 | 205.76  | 209.43  | 207.3   | 6.54   | -1.23 |
| 143.77  | 137.94 | 141.39  | 9.33  | 109.67  | 103.37  | 105.89  | 8.51   | -1.34 |
| 59.94   | 53.81  | 56.82   | 5.42  | 35.08   | 38.92   | 37.22   | 5.58   | -1.53 |
| 66      | 65.67  | 65.82   | 5.62  | 61.35   | 67.13   | 63.91   | 7.25   | -1.03 |
| 211.16  | 274.17 | 242.39  | 32.97 | 203.29  | 253.41  | 231.69  | 30.55  | -1.05 |
| 393.86  | 357.03 | 375.71  | 23.25 | 475.2   | 452.96  | 462.24  | 22.44  | 1.23  |
| 164.4   | 149.16 | 156.92  | 10.56 | 108.66  | 88.31   | 98.23   | 12.75  | -1.6  |
| 95.07   | 96.2   | 95.5    | 4.84  | 91.56   | 87.01   | 89.65   | 4.99   | -1.07 |
| 104.77  | 125.46 | 114.92  | 11.62 | 122.35  | 104.68  | 113.45  | 10.89  | -1.01 |
| 176.64  | 162.91 | 171.82  | 12.93 | 115.47  | 103.83  | 108.23  | 11.67  | -1.59 |
| 156.66  | 149    | 152.48  | 9.11  | 134.85  | 157.99  | 147     | 13.08  | -1.04 |
| 682.49  | 692.78 | 687.7   | 28.83 | 530.18  | 607.18  | 571.51  | 51.62  | -1.2  |
| 80.62   | 92.97  | 87.73   | 7.79  | 79.84   | 76.12   | 78.08   | 8.53   | -1.12 |
| 235.72  | 240.42 | 237.73  | 7.52  | 100.17  | 186.82  | 144.26  | 43.96  | -1.65 |
| 64.68   | 63.75  | 64.32   | 5.82  | 56.85   | 36.7    | 46.75   | 11.8   | -1.38 |
| 141.66  | 133.69 | 137.57  | 8.14  | 70.08   | 101.64  | 85.62   | 17.1   | -1.61 |
| 262.05  | 243.44 | 252.37  | 11.77 | 235.07  | 250.6   | 245.87  | 22.69  | -1.03 |
| 35.09   | 40.65  | 37.86   | 4.84  | 5.33    | 8.32    | 6.72    | 6.25   | -5.63 |
| 804.33  | 888.44 | 849.85  | 46.42 | 711.67  | 807.69  | 761.43  | 54.91  | -1.12 |
| 46.82   | 70.96  | 59.4    | 12.59 | 35.44   | 71.39   | 53.56   | 18.26  | -1.11 |
| 28.18   | 33.33  | 30.38   | 3.78  | 6.12    | 33.87   | 20.51   | 14.28  | -1.48 |
| 502.39  | 455.85 | 480.08  | 27.54 | 816.1   | 587.55  | 701.04  | 117.33 | 1.46  |
| 155.26  | 257.04 | 205.86  | 51.61 | 275.6   | 300.55  | 288.21  | 19.47  | 1.4   |
| 266.25  | 350.52 | 308.14  | 43.28 | 393.52  | 449     | 421.06  | 31.47  | 1.37  |
| 587.97  | 586.4  | 587.07  | 22.32 | 638.61  | 723.2   | 683.82  | 51.81  | 1.16  |
| 48.92   | 61.87  | 54.8    | 10.88 | 31.83   | 37.38   | 34.82   | 13.79  | -1.57 |
| 1596.96 | 1611.8 | 1607.19 | 35.79 | 1842.27 | 1540.12 | 1689.84 | 155.45 | 1.05  |
| 691.44  | 672.62 | 682.44  | 15.12 | 652.08  | 775.21  | 713.34  | 64.1   | 1.05  |
| 8.85    | 8.94   | 8.9     | 2.48  | 11.87   | 1.05    | 5.9     | 6.5    | -1.51 |

|          |          |         |        |          |          |          |        |       |
|----------|----------|---------|--------|----------|----------|----------|--------|-------|
| 424.6    | 413.26   | 418.86  | 15.14  | 488.81   | 454.21   | 471.02   | 25.92  | 1.12  |
| 55.52    | 52.81    | 54.18   | 6.08   | 57.13    | 58.13    | 57.71    | 3.93   | 1.07  |
| 25.61    | 28.74    | 26.61   | 3.4    | 31       | 22.92    | 26.58    | 4.93   | -1    |
| 8.18     | 19.89    | 13.63   | 9.17   | 13.4     | 8.64     | 10.68    | 5.3    | -1.28 |
| 6.51     | 12.34    | 8.72    | 4.55   | 9.54     | 8.05     | 8.71     | 3.23   | -1    |
| 12.77    | 21.68    | 17.44   | 6.52   | 11.02    | 21.51    | 15.87    | 7.43   | -1.1  |
| 1201.63  | 1144.36  | 1170.61 | 46.44  | 1288.52  | 1113.44  | 1196.49  | 108.67 | 1.02  |
| 2111.78  | 2271.54  | 2193.43 | 84.49  | 1816.04  | 2408.1   | 2116.03  | 299.03 | -1.04 |
| 1063.57  | 1336.46  | 1199.74 | 137.42 | 1362.23  | 1302.28  | 1331.38  | 40.15  | 1.11  |
| 35.3     | 21.83    | 28.14   | 7.47   | 3.85     | 15.26    | 9.14     | 7.09   | -3.08 |
| 27.75    | 31.76    | 29.68   | 8.05   | 24.48    | 45.35    | 32.74    | 15.12  | 1.1   |
| 37.06    | 42.3     | 40.03   | 6.79   | 41.57    | 35.21    | 38.29    | 5.52   | -1.05 |
| 357.91   | 362.8    | 359.81  | 10.67  | 338.38   | 392.72   | 366.65   | 28.26  | 1.02  |
| 22.23    | 12.74    | 17.96   | 5.88   | 10.06    | 13.74    | 12.11    | 2.82   | -1.48 |
| 14.42    | 29.54    | 23      | 8.41   | 19.83    | 33.65    | 27.07    | 7.36   | 1.18  |
| 12111.43 | 12629.35 | 12359.2 | 310.95 | 11671.08 | 12367.13 | 12030.06 | 377.57 | -1.03 |
| 754.58   | 842.3    | 796.16  | 47.38  | 622.5    | 697.94   | 658.45   | 44.34  | -1.21 |
| 28.01    | 22.2     | 25.04   | 5.4    | 32.86    | 24.84    | 29.32    | 7.7    | 1.17  |
| 171.18   | 271.27   | 220.65  | 51.09  | 164.9    | 196.82   | 180.75   | 21.86  | -1.22 |
| 4.63     | 4.1      | 4.39    | 2.8    | 2.15     | 26.83    | 14.48    | 12.4   | 3.3   |
| 15.04    | 18.68    | 16.94   | 6.06   | 17.11    | 19.26    | 18.28    | 5.58   | 1.08  |
| 54.78    | 45.33    | 49.81   | 6.72   | 53.64    | 48.51    | 50.77    | 7.02   | 1.02  |
| 435.18   | 430.76   | 433.2   | 19.26  | 346.96   | 359.03   | 351.93   | 28.26  | -1.23 |
| 42.16    | 6.17     | 24.14   | 18.29  | 41.48    | 37.3     | 39.02    | 4.37   | 1.62  |
| 650.06   | 657.97   | 652.76  | 14.94  | 437.76   | 736.02   | 587.95   | 149.89 | -1.11 |
| 4883.46  | 4355.83  | 4604.95 | 288.71 | 4551.8   | 4433.25  | 4492.18  | 97.57  | -1.03 |
| 5752.72  | 5436.86  | 5578.98 | 198.8  | 5777.3   | 5697.04  | 5725.65  | 160.79 | 1.03  |
| 281.5    | 271.11   | 274.17  | 13.27  | 259.1    | 283.44   | 272.63   | 20.71  | -1.01 |
| 165.16   | 240.14   | 202.29  | 42.19  | 229.5    | 361.24   | 293.48   | 68.67  | 1.45  |
| 86.17    | 125.13   | 106.34  | 21.89  | 70.69    | 93.42    | 81.49    | 14.11  | -1.3  |
| 313.71   | 383.22   | 347.09  | 45.75  | 459.01   | 409.06   | 434.95   | 44.02  | 1.25  |
| 3.07     | 6.05     | 4.29    | 3.37   | 6.66     | 4.86     | 5.64     | 5.52   | 1.32  |
| 60.54    | 65.6     | 62.75   | 5.03   | 76.14    | 60.8     | 67.85    | 9.53   | 1.08  |
| 223.39   | 270.66   | 246.72  | 24.26  | 213.28   | 232.17   | 222.02   | 12.95  | -1.11 |
| 118.65   | 92.1     | 105.74  | 14.39  | 100.73   | 106.36   | 103.29   | 6.23   | -1.02 |
| 45.41    | 63.47    | 54.52   | 9.5    | 61.84    | 41.07    | 51.41    | 10.73  | -1.06 |

|         |         |         |        |         |         |         |        |       |
|---------|---------|---------|--------|---------|---------|---------|--------|-------|
| 44.53   | 50.43   | 47.33   | 6.79   | 28.69   | 27.24   | 27.93   | 5.95   | -1.69 |
| 418.58  | 549.17  | 482.36  | 67.44  | 613.36  | 594.27  | 601.95  | 22.97  | 1.25  |
| 3.07    | 2.36    | 2.83    | 1.24   | 3.74    | 6.04    | 4.5     | 2.22   | 1.59  |
| 7428.98 | 7322.28 | 7358.43 | 108.6  | 6561.8  | 7044.95 | 6795.89 | 272.9  | -1.08 |
| 25.74   | 3.73    | 14.92   | 11.39  | 45.87   | 42.78   | 44.35   | 2.9    | 2.97  |
| 6990.16 | 6789.82 | 6878.7  | 140.86 | 6519.19 | 6734.11 | 6625.22 | 159.45 | -1.04 |
| 21.68   | 20.21   | 21      | 4.46   | 28.39   | 13.24   | 21.01   | 8.53   | 1     |
| 111.92  | 107.96  | 110.17  | 9.47   | 114.62  | 135.9   | 124.67  | 17.07  | 1.13  |
| 22.48   | 19.32   | 20.74   | 2.96   | 20.79   | 11.76   | 16.33   | 4.86   | -1.27 |
| 92.22   | 104.81  | 98.81   | 8.15   | 74.83   | 92.71   | 83.75   | 10.04  | -1.18 |
| 44.79   | 42.02   | 43.91   | 5.32   | 39.99   | 38.39   | 39.15   | 4.91   | -1.12 |
| 13.92   | 12.91   | 13.45   | 8.47   | 18.67   | 21.78   | 19.97   | 9.71   | 1.48  |
| 10.75   | 11.68   | 11.08   | 2.33   | 20.08   | 16.51   | 17.56   | 6.79   | 1.58  |
| 1831.05 | 1264.25 | 1546.94 | 287.86 | 935.93  | 618.45  | 778.05  | 165.66 | -1.99 |
| 4.98    | 9.07    | 6.74    | 6.98   | 9.81    | 2.69    | 5.03    | 8.02   | -1.34 |
| 272.6   | 205.56  | 239.8   | 35.89  | 196.23  | 187.92  | 192.8   | 11.6   | -1.24 |
| 1928.43 | 1894.14 | 1916.53 | 88.27  | 1519.46 | 1828.5  | 1670.17 | 173.21 | -1.15 |
| 56.95   | 68.66   | 63.03   | 7.25   | 47.17   | 50.57   | 49.53   | 4.97   | -1.27 |
| 92.53   | 91.44   | 91.95   | 6.61   | 48.61   | 63.19   | 55.83   | 10.23  | -1.65 |
| 135.3   | 185.67  | 160.71  | 25.66  | 127.27  | 158.1   | 144.48  | 17.73  | -1.11 |
| 301.06  | 230.76  | 263.57  | 45.41  | 474.06  | 371.26  | 426.67  | 65.17  | 1.62  |
| 527.68  | 676.34  | 602.9   | 74.39  | 477.6   | 552.34  | 516.11  | 38.7   | -1.17 |
| 38.72   | 41.39   | 39.92   | 5.07   | 13.15   | 9.25    | 11.14   | 5.64   | -3.58 |
| 48.29   | 44.07   | 46.11   | 4.45   | 4.3     | 22.41   | 13.5    | 9.18   | -3.41 |
| 269.23  | 408.12  | 337.74  | 70.64  | 197.51  | 314.74  | 254.01  | 63.47  | -1.33 |
| 395.07  | 386.08  | 390.33  | 11.32  | 415.34  | 398.53  | 407.27  | 22.45  | 1.04  |
| 164.18  | 160.87  | 162.84  | 6.26   | 247.05  | 148.74  | 197.78  | 50.06  | 1.21  |
| 42.85   | 55.28   | 49.29   | 7.16   | 31.36   | 26.78   | 29.42   | 3.48   | -1.68 |
| 90      | 112.65  | 102.16  | 12.63  | 119.71  | 109.63  | 114.9   | 8.33   | 1.12  |
| 9.15    | 8.82    | 9.06    | 2.1    | 4.43    | 15.92   | 10.07   | 6.41   | 1.11  |
| 44.81   | 36.38   | 40.81   | 6.27   | 30.68   | 42.49   | 37      | 7.54   | -1.1  |
| 34.88   | 61.84   | 47.92   | 15.5   | 32.33   | 53.39   | 41.93   | 12.4   | -1.14 |
| 7.71    | 19.31   | 13.23   | 6.29   | 13.92   | 12.2    | 13.02   | 2.71   | -1.02 |
| 373.02  | 493.69  | 433.3   | 61.46  | 405.61  | 463.16  | 432.92  | 33.7   | -1    |
| 74.32   | 81.39   | 76.98   | 9.37   | 86.45   | 93.71   | 90.25   | 10.06  | 1.17  |
| 24.64   | 23.22   | 23.86   | 7.6    | 84.73   | 86.97   | 85.96   | 8.13   | 3.6   |

|        |        |        |       |        |        |        |       |       |
|--------|--------|--------|-------|--------|--------|--------|-------|-------|
| 40.03  | 29.62  | 34.93  | 5.52  | 18.47  | 11.93  | 15.19  | 4.85  | -2.3  |
| 192.23 | 246.21 | 216.11 | 34.72 | 272.56 | 234.4  | 256    | 35.3  | 1.18  |
| 41.77  | 20     | 31.14  | 11.46 | 22.02  | 1.16   | 11.47  | 10.8  | -2.72 |
| 53.16  | 74.36  | 63.3   | 12.63 | 42.71  | 53.61  | 48.28  | 7.91  | -1.31 |
| 30.53  | 38.99  | 34.84  | 7.46  | 61.04  | 49.65  | 55.78  | 13.59 | 1.6   |
| 41.57  | 48.99  | 45.44  | 6.16  | 40.11  | 50.03  | 46     | 6.8   | 1.01  |
| 18.83  | 20.92  | 20.25  | 2.5   | 21.31  | 21.08  | 21.19  | 1.15  | 1.05  |
| 36.04  | 30.08  | 33.2   | 5.82  | 6.89   | 9.29   | 8.16   | 4.42  | -4.07 |
| 29.48  | 31.79  | 30.55  | 4.5   | 24.72  | 21.33  | 23     | 4.54  | -1.33 |
| 112.97 | 109.56 | 111.35 | 6.46  | 141.91 | 158.05 | 150.78 | 9.48  | 1.35  |
| 247.88 | 303.29 | 274.91 | 29.47 | 251.52 | 264.61 | 258.03 | 10.9  | -1.07 |
| 72.85  | 95.14  | 83.8   | 12.42 | 29.47  | 41.82  | 36.08  | 7.36  | -2.32 |
| 140.72 | 107.86 | 123.79 | 17.8  | 52.61  | 44.87  | 48.09  | 5.16  | -2.57 |
| 2.35   | 13.56  | 8.02   | 5.77  | 10.96  | 10.79  | 10.86  | 1.9   | 1.35  |
| 41.31  | 19.19  | 30.35  | 11.79 | 27.37  | 41.08  | 33.77  | 7.32  | 1.11  |
| 186.41 | 245.02 | 215.26 | 30.18 | 263.33 | 235.58 | 246.9  | 20.2  | 1.15  |
| 78.75  | 78.73  | 78.74  | 5.84  | 42.75  | 36.05  | 39.36  | 6.11  | -2    |
| 10.23  | 6.78   | 9.13   | 2.86  | 23.47  | 26.96  | 25.08  | 3.13  | 2.75  |
| 33.31  | 29.2   | 31.07  | 6.26  | 35.08  | 27.28  | 30.48  | 6.61  | -1.02 |
| 10.17  | 11.2   | 10.54  | 4.02  | 14.81  | 19.84  | 17.33  | 2.7   | 1.64  |
| 302.53 | 215.95 | 259.11 | 45.26 | 101.12 | 107.63 | 105.1  | 9.3   | -2.47 |
| 69.28  | 57.43  | 63.89  | 7.13  | 30.2   | 24.17  | 27.63  | 4.07  | -2.31 |
| 50.52  | 42.63  | 46.6   | 4.69  | 15.19  | 21.03  | 18.37  | 3.61  | -2.54 |
| 10.88  | 18.83  | 14.69  | 4.5   | 35.68  | 53.93  | 44.62  | 9.78  | 3.04  |
| 36.58  | 51.94  | 44.53  | 8.56  | 25.32  | 23.68  | 24.41  | 3.6   | -1.82 |
| 39.65  | 26.9   | 32.85  | 7.77  | 33.17  | 31.17  | 31.96  | 4.38  | -1.03 |
| 6.02   | 1.23   | 3.65   | 3.21  | 8.87   | 3.4    | 6.18   | 4.85  | 1.69  |
| 22.26  | 14.25  | 18.32  | 6.02  | 20.96  | 19.16  | 20.28  | 3.68  | 1.11  |
| 5.99   | 2.27   | 3.67   | 3.61  | 16.48  | 19.19  | 17.9   | 3.35  | 4.88  |
| 6.58   | 9.11   | 7.55   | 3.55  | 24.46  | 35.78  | 29.49  | 6.95  | 3.9   |
| 1      | 4.2    | 2.06   | 2.49  | 2.9    | 12.87  | 7.88   | 5.28  | 3.83  |
| 2.19   | 7.09   | 4.12   | 3.26  | 15.88  | 23.58  | 20.5   | 4.79  | 4.98  |
| 30.01  | 28.74  | 29.42  | 6.21  | 26.75  | 28.12  | 27.37  | 2.94  | -1.07 |
| 412.32 | 478.34 | 445.08 | 34.49 | 505.6  | 455.7  | 479.58 | 29.89 | 1.08  |
| 3      | 3.22   | 3.11   | 4.66  | 2.51   | 3.57   | 3.02   | 4.22  | -1.03 |
| 46.45  | 49.85  | 48.1   | 6.78  | 40.91  | 39.65  | 40.36  | 7.28  | -1.19 |

|         |         |         |        |         |         |         |        |        |
|---------|---------|---------|--------|---------|---------|---------|--------|--------|
| 2793.55 | 3068.04 | 2930.32 | 139.32 | 2556.95 | 3005.54 | 2779.22 | 230.72 | -1.05  |
| 47.45   | 51.72   | 50.32   | 4.85   | 26.06   | 25.23   | 25.62   | 3.1    | -1.96  |
| 48.58   | 86.96   | 68.71   | 19.78  | 15.87   | 33.64   | 23.78   | 10.82  | -2.89  |
| 9.66    | 5.15    | 7.05    | 3.18   | 31.13   | 28.2    | 29.32   | 4.69   | 4.16   |
| 96.26   | 99.88   | 97.77   | 9.11   | 75.24   | 108.01  | 89.99   | 18.35  | -1.09  |
| 49.71   | 65.4    | 57.25   | 8.35   | 21.98   | 51.39   | 36.58   | 15     | -1.57  |
| 112.47  | 103.38  | 108.61  | 21.42  | 137.02  | 191.18  | 164.03  | 27.57  | 1.51   |
| 34.39   | 39.19   | 37.41   | 4.77   | 35.52   | 28.26   | 32.74   | 5.57   | -1.14  |
| 5.82    | 6.63    | 6.2     | 1.88   | 24.05   | 30.93   | 27.67   | 3.95   | 4.46   |
| 78.72   | 45.43   | 62.08   | 17.16  | 59.01   | 34.66   | 46.63   | 13.21  | -1.33  |
| 15.78   | 13.27   | 14.95   | 4.13   | 40.23   | 35.53   | 37.69   | 4.44   | 2.52   |
| 7.08    | 10.99   | 8.49    | 3.18   | 6.68    | 14.12   | 10.75   | 4.81   | 1.27   |
| 3.84    | 6.56    | 4.63    | 3.03   | 6.86    | 3.52    | 5.49    | 2.61   | 1.19   |
| 43.89   | 48.99   | 47.14   | 4.89   | 45.35   | 38.76   | 41.99   | 5.38   | -1.12  |
| 10.57   | 16.69   | 13.26   | 5.49   | 35.56   | 22.38   | 28.32   | 8.66   | 2.14   |
| 11.42   | 5.32    | 7.69    | 5.66   | 27.49   | 36.07   | 31.7    | 4.71   | 4.12   |
| 46.7    | 59.58   | 52.76   | 7.6    | 24.58   | 23.6    | 23.87   | 4.29   | -2.21  |
| 58.94   | 60.08   | 59.57   | 9.27   | 67.78   | 55.31   | 61.96   | 10.2   | 1.04   |
| 116.06  | 155.21  | 135.45  | 20.75  | 72.98   | 146.07  | 108.98  | 37.39  | -1.24  |
| 5.35    | 5.54    | 5.46    | 2      | 25.61   | 30.53   | 28.43   | 3.86   | 5.2    |
| 145.41  | 197.73  | 171.6   | 27.07  | 116     | 158.19  | 136.73  | 24.09  | -1.26  |
| 14.8    | 10.09   | 12.83   | 4.18   | 22.86   | 8.33    | 15.25   | 9.33   | 1.19   |
| 43.09   | 28.6    | 35.62   | 8.17   | 41.9    | 31.81   | 36.75   | 6.63   | 1.03   |
| 13.47   | 31.48   | 22.26   | 9.22   | 1       | 2.31    | 1.36    | 1.62   | -16.42 |
| 38.34   | 29.6    | 33.89   | 5.37   | 11.31   | 15.81   | 12.87   | 3.76   | -2.63  |
| 29.77   | 45.87   | 37.46   | 8.43   | 15.91   | 8.24    | 12.19   | 4.75   | -3.07  |
| 233.27  | 174.08  | 203.71  | 30.37  | 92.32   | 83.97   | 87.93   | 6.96   | -2.32  |
| 44.01   | 44.72   | 44.44   | 2.52   | 20.66   | 21.11   | 20.87   | 2.35   | -2.13  |
| 25.11   | 28.47   | 26.61   | 4.75   | 56.17   | 67      | 60.45   | 7.91   | 2.27   |
| 35.32   | 44.32   | 39.59   | 5.34   | 8.3     | 18.58   | 13.46   | 5.5    | -2.94  |
| 45.95   | 40.46   | 43.28   | 4.49   | 18.28   | 45.58   | 32.21   | 13.88  | -1.34  |
| 23.6    | 29.49   | 26.33   | 3.74   | 32.18   | 11.11   | 21.45   | 11.14  | -1.23  |
| 40.26   | 30.85   | 36.03   | 5.7    | 27.22   | 13.89   | 20.53   | 7.39   | -1.75  |
| 27.88   | 26.45   | 27.09   | 3.05   | 36.29   | 34.35   | 35.4    | 5.09   | 1.31   |
| 60.85   | 4.97    | 32.78   | 28.76  | 4.62    | 10.49   | 7.54    | 4.67   | -4.35  |
| 44.38   | 42.09   | 43.08   | 1.99   | 45.53   | 35.58   | 41.03   | 5.82   | -1.05  |

|        |        |        |       |        |        |        |       |       |
|--------|--------|--------|-------|--------|--------|--------|-------|-------|
| 6.99   | 11.63  | 9.54   | 2.78  | 36.03  | 25.67  | 31.36  | 6.6   | 3.29  |
| 15.72  | 17.32  | 16.3   | 4.66  | 47.14  | 36.65  | 41.57  | 6.01  | 2.55  |
| 51.31  | 52.02  | 51.83  | 3.26  | 53.32  | 51.61  | 52.43  | 9.2   | 1.01  |
| 122.39 | 190.07 | 155.93 | 34.96 | 90.91  | 141.4  | 115.98 | 26.17 | -1.34 |
| 1.24   | 7.41   | 4.2    | 3.21  | 35.11  | 21.95  | 28.63  | 7.08  | 6.82  |
| 151.89 | 202.34 | 176.99 | 26.64 | 61.86  | 90.09  | 75.8   | 15.14 | -2.33 |
| 113.72 | 186.25 | 149.97 | 36.24 | 68.25  | 138.07 | 103.11 | 34.98 | -1.45 |
| 8.13   | 3.25   | 5.36   | 2.99  | 30.34  | 26.43  | 28.62  | 3.15  | 5.34  |
| 46.78  | 47.62  | 47.16  | 4.36  | 21.37  | 15.66  | 18.56  | 5.88  | -2.54 |
| 27.79  | 25.77  | 26.83  | 3.15  | 25.51  | 15.37  | 20.83  | 6.41  | -1.29 |
| 13.41  | 14.15  | 13.91  | 7.59  | 15.95  | 7.51   | 11.19  | 6.64  | -1.24 |
| 3.01   | 9.06   | 6.09   | 4.41  | 4.55   | 17.75  | 11.05  | 6.82  | 1.81  |
| 25.6   | 25.4   | 25.52  | 2.54  | 18.95  | 36.05  | 27.8   | 8.72  | 1.09  |
| 40.84  | 52.28  | 46.98  | 6.19  | 30.89  | 26.12  | 27.82  | 5.62  | -1.69 |
| 34     | 27.43  | 30.05  | 4.78  | 14.87  | 19.65  | 16.64  | 5.03  | -1.81 |
| 8.07   | 7.41   | 7.72   | 4.68  | 27.05  | 40.87  | 33.64  | 7.94  | 4.36  |
| 5.59   | 4.82   | 5.21   | 5.59  | 65.21  | 6.15   | 35.65  | 30.67 | 6.84  |
| 13.4   | 14.01  | 13.83  | 3.95  | 17.82  | 13.76  | 16.12  | 5.38  | 1.17  |
| 21.8   | 36.67  | 29.22  | 8.57  | 26.77  | 30.19  | 28.34  | 3.93  | -1.03 |
| 41.81  | 29.33  | 35.09  | 7.57  | 5.36   | 34.74  | 19.89  | 15.03 | -1.76 |
| 12.85  | 8.23   | 10.47  | 5.15  | 38.15  | 33.47  | 35.4   | 4.51  | 3.38  |
| 18.96  | 13.54  | 16.22  | 3.55  | 19.46  | 37.21  | 28.34  | 9.16  | 1.75  |
| 96.05  | 140.91 | 118.08 | 23.16 | 63.79  | 77.51  | 70.12  | 8.27  | -1.68 |
| 37.22  | 36.42  | 36.76  | 4.28  | 37.62  | 44.46  | 40.75  | 3.94  | 1.11  |
| 23.36  | 28.11  | 25.21  | 3.61  | 55.9   | 28.94  | 42.49  | 14.31 | 1.69  |
| 1.17   | 6.46   | 3.49   | 3.38  | 29.42  | 19.97  | 24.46  | 6.25  | 7     |
| 123.85 | 146.51 | 134.82 | 12.72 | 136.2  | 144.11 | 140.43 | 7.47  | 1.04  |
| 195.38 | 201    | 198.2  | 17.76 | 233.12 | 207.19 | 221.45 | 22.32 | 1.12  |



| lower bound | upper bound | difference of | filtered | DMSOA70 | DMSOB70 | baseline mea | baseline mea | BKM120A70 |
|-------------|-------------|---------------|----------|---------|---------|--------------|--------------|-----------|
| 0.94        | 1.44        | 75.86         |          | 400.58  | 442.68  | 423.25       | 22.87        | 183.86    |
| -0.94       | -1.1        | -11.32        |          | 631.61  | 675.45  | 653.35       | 24.68        | 424.6     |
| -0.93       | -1.24       | -47.56        |          | 617.97  | 695.64  | 657.45       | 40.83        | 1028.15   |
| -0.92       | -1.22       | -18.11        |          | 363.33  | 372.7   | 366.48       | 15.93        | 183.63    |
| 0.88        | 1.19        | 30.2          |          | 1172.01 | 1322.43 | 1245.5       | 77.4         | 589.87    |
| -0.99       | -2.31       | -38.58        |          | 110.89  | 139.6   | 125.11       | 15.31        | 57.15     |
| 0.89        | 1.21        | 43.83         |          | 1096.02 | 1217.08 | 1159.52      | 73.07        | 1826.88   |
| -0.93       | -1.42       | -79.02        |          | 515.18  | 634.2   | 574.71       | 62.48        | 1233.46   |
| -0.7        | -1.36       | -3.76         |          | 354.32  | 506.15  | 431.4        | 77.87        | 988.73    |
| -0.79       | -1.35       | -58.13        |          | 893.02  | 1191.99 | 1041.66      | 151.83       | 2501.6    |
| -1.1        | -1.37       | -546.09       |          | 3101.86 | 2752.62 | 2926.87      | 181.59       | 5166.19   |
| -0.94       | -1.1        | -15.47        |          | 1039.1  | 1060.35 | 1051.34      | 21.68        | 1484.87   |
| 0.93        | 1.3         | 33.49         |          | 336.27  | 402.96  | 369.18       | 34.58        | 196.71    |
| 0.94        | 1.18        | 43.53         |          | 760.88  | 807.81  | 782.49       | 27.93        | 472.51    |
| -0.94       | -1.36       | -106.8        |          | 908.62  | 1026.78 | 966.17       | 67.8         | 552.15    |
| -0.93       | -1.19       | -66.44        |          | 1425.62 | 1476.09 | 1452.52      | 46.27        | 1149.99   |
| -1.12       | -1.49       | -61.5         |          | 278.29  | 256.4   | 268.43       | 19.4         | 146.92    |
| 0.87        | 2.61        | 29.66         |          | 60.98   | 60.7    | 60.84        | 14.05        | 95.6      |

|       |       |         |         |         |         |        |         |
|-------|-------|---------|---------|---------|---------|--------|---------|
| -1    | -1.62 | -229.92 | 1055.37 | 1203.55 | 1133.04 | 77.04  | 321.91  |
| 0.79  | 1.31  | 12.78   | 308.02  | 289.41  | 298.97  | 17.58  | 186.22  |
| 0.88  | 2.88  | 14.88   | 19.4    | 23.16   | 20.82   | 3.75   | 28.81   |
| -1.08 | -1.43 | -594.65 | 3164.95 | 3174.63 | 3171.38 | 76.68  | 1768.04 |
| -0.86 | -1.28 | -12.31  | 247.29  | 283.17  | 263.81  | 22.74  | 140.23  |
| -0.97 | -2.15 | -24.64  | 95.19   | 89.74   | 93.38   | 7.21   | 69.73   |
| -0.77 | -1.33 | -6.88   | 399.13  | 469.53  | 431.37  | 49.77  | 761.5   |
| 0.96  | 1.11  | 158.32  | 4310.71 | 4464    | 4388.22 | 102.33 | 3091.45 |
| 0.96  | 1.22  | 55.2    | 699.72  | 766.61  | 733.63  | 44.91  | 366.22  |
| 0.88  | 1.38  | 53.22   | 532.74  | 679.17  | 605.2   | 73.9   | 198.33  |
| -0.84 | -1.23 | -10.96  | 332.73  | 404.8   | 367.77  | 37.34  | 213.77  |
| -0.85 | -1.38 | -22.03  | 356.71  | 393.73  | 376.32  | 21.43  | 580.8   |
| 0.78  | 1.24  | 1.07    | 390.53  | 371.98  | 384.27  | 17.35  | 231.29  |
| -0.91 | -1.43 | -323.09 | 2334.47 | 2806.73 | 2571.04 | 243.53 | 1260.81 |
| 0.9   | 1.15  | 9.96    | 868.27  | 762.87  | 815.37  | 56.01  | 511.89  |
| -1.05 | -1.21 | -85.25  | 774.64  | 759.93  | 767.96  | 18.65  | 497.43  |
| 0.74  | 1.53  | 26.37   | 257.65  | 231.91  | 245.21  | 22.75  | 125.36  |
| -1.15 | -1.65 | -150.31 | 579.41  | 483.63  | 532.99  | 53.74  | 231.57  |
| -1.02 | -1.51 | -146.22 | 747.12  | 813.24  | 781.99  | 41.12  | 349.18  |
| -1.17 | -1.55 | -136.21 | 543.79  | 544.73  | 544.35  | 12.21  | 845.68  |
| 1.3   | 2.16  | 172.1   | 240.37  | 241.22  | 240.82  | 11.93  | 366.06  |
| 0.85  | 1.21  | 6.22    | 270.58  | 279.35  | 274.62  | 12.37  | 141.26  |
| 1.29  | 21.17 | 10.54   | 6.31    | 2.72    | 4.32    | 2.18   | 3.8     |
| 0.96  | 1.26  | 27.63   | 262.44  | 255.37  | 259.8   | 8.33   | 180.91  |
| 0.99  | 1.16  | 110.92  | 1461.89 | 1479.53 | 1471.01 | 34.19  | 941.84  |
| -1.09 | -1.7  | -140.04 | 507.55  | 583.11  | 545.75  | 39.99  | 262.69  |
| 0.71  | 1.44  | 8.69    | 142.53  | 141.17  | 141.8   | 8.62   | 78.15   |
| -1.14 | -1.59 | -70.21  | 269.02  | 294.12  | 281.73  | 13.68  | 126.08  |
| -0.94 | -1.74 | -43.81  | 186.38  | 217.15  | 202.5   | 26.64  | 75.06   |
| 1.34  | 3.34  | 23.58   | 19.84   | 28.78   | 24.28   | 5.86   | 50.02   |
| 0.82  | 1.25  | 22.09   | 729.85  | 760.26  | 746.61  | 35.33  | 416.85  |
| -1    | -1.51 | -18.6   | 93.82   | 108.46  | 101.17  | 8.72   | 74.39   |
| 0.89  | 1.21  | 5.58    | 132.7   | 133.83  | 133.44  | 6.1    | 82.42   |
| -1.04 | -1.4  | -75.08  | 467.71  | 450.38  | 458.51  | 16.09  | 131.56  |
| -1.05 | -1.36 | -77.84  | 499.56  | 482.99  | 493.6   | 15.79  | 142.59  |
| 1.04  | 1.37  | 92.24   | 459.94  | 514.65  | 487.36  | 28.36  | 234.24  |

|       |       |          |         |         |         |        |         |
|-------|-------|----------|---------|---------|---------|--------|---------|
| 0.75  | 1.47  | 4.25     | 103.77  | 136.36  | 119.48  | 18.82  | 8.96    |
| 0.72  | 1.53  | 202.99   | 2394.11 | 3023.73 | 2705.82 | 342.79 | 1222.17 |
| -0.91 | -1.14 | -4       | 290.14  | 287.03  | 288.53  | 10.61  | 156.13  |
| -1.16 | -1.7  | -52.35   | 186.67  | 192.37  | 188.82  | 8.99   | 329.92  |
| -0.91 | -1.72 | -37.91   | 202.93  | 230.83  | 215.49  | 17.48  | 114.16  |
| -1.1  | -1.35 | -1202.38 | 6884.42 | 6667.52 | 6762.95 | 149.71 | 5279.87 |
| -1.04 | -1.29 | -774.64  | 5981.73 | 5671.05 | 5816.73 | 186.34 | 4963.99 |
| 0.68  | 1.63  | 0.4      | 33.17   | 25.57   | 28.83   | 6.13   | 52.46   |
| 0.6   | 3.28  | 2.85     | 9.31    | 18.61   | 14.23   | 5.34   | 34.52   |
| -1.06 | -1.43 | -116.35  | 588.56  | 659.72  | 625.21  | 37.64  | 259.27  |
| -1.44 | -2.77 | -79.91   | 155.2   | 176.79  | 165.91  | 13.26  | 128.09  |
| -1.25 | -1.6  | -888.04  | 3172.31 | 2799.22 | 2985.37 | 199.9  | 2343.31 |
| -1.02 | -2.19 | -53.32   | 177.03  | 190.3   | 184.77  | 11.53  | 125.56  |
| -0.95 | -1.56 | -65.61   | 407.66  | 422.06  | 415.98  | 13.72  | 240.9   |
| 1.15  | 1.77  | 230.46   | 500.5   | 629.42  | 565.04  | 64.94  | 90.66   |
| -1.17 | -2.4  | -17.69   | 43.27   | 47.96   | 46.01   | 5.05   | 14.29   |
| 1.03  | 1.19  | 115.45   | 1040.51 | 1072.73 | 1055.77 | 25.34  | 588.88  |
| -0.76 | -1.95 | -6.82    | 62.88   | 62.56   | 62.7    | 6.09   | 95.74   |
| 0.84  | 1.21  | 32.25    | 1536.86 | 1668.23 | 1603.87 | 74.45  | 1008.5  |
| -1.49 | -3.06 | -21.72   | 45.68   | 36.66   | 41.03   | 5.96   | 16.55   |
| -1.59 | -2.42 | -60.87 * | 131.39  | 115.27  | 124.34  | 11.11  | 55.01   |
| -0.88 | -1.24 | -9.15    | 251.97  | 242.26  | 246.97  | 10.96  | 164.17  |
| -1.06 | -1.91 | -44.4    | 164.26  | 141.72  | 153.34  | 16.06  | 80.28   |
| 0.89  | 1.45  | 19.29    | 148.94  | 189.87  | 169.31  | 22.74  | 74.95   |
| -1.11 | -1.56 | -95.68   | 384.66  | 426.13  | 404.69  | 23.54  | 148.23  |
| -0.8  | -1.53 | -15.07   | 269.2   | 272.41  | 270.96  | 17.32  | 152.72  |
| 0.99  | 3.58  | 14.68    | 21.17   | 14.28   | 18.31   | 5.11   | 21.63   |
| -0.56 | -2.65 | -4.71    | 42.13   | 64.02   | 52.69   | 12.75  | 82.52   |
| -0.74 | -2.33 | -4.88    | 32.46   | 30.15   | 31.21   | 4.38   | 12.78   |
| 0.86  | 1.26  | 34.08    | 612.56  | 666.1   | 639.3   | 31.07  | 382.95  |
| 0.03  | 2.21  | 1.68     | 19.7    | 21.2    | 20.37   | 2.17   | 24.67   |
| 0.97  | 1.97  | 16.36    | 42.24   | 46.1    | 44.43   | 7.03   | 68.1    |
| 0.04  | 6.06  | 4.71     | 12.16   | 10.27   | 11.4    | 5.08   | 26.24   |
| -0.96 | -2.16 | -12.18   | 43.21   | 47.09   | 44.64   | 4.81   | 17.13   |
| -1.16 | -1.87 | -33.74   | 109.9   | 108.73  | 109.23  | 6.26   | 56.19   |
| 0.72  | 1.43  | 6.56     | 331.58  | 255.8   | 293.47  | 39.34  | 130.5   |

|       |           |         |         |         |         |        |         |
|-------|-----------|---------|---------|---------|---------|--------|---------|
| 0.91  | 1.21      | 16.55   | 347.51  | 402.21  | 375.06  | 29.27  | 570.62  |
| -0.95 | -1.42     | -65.18  | 502.03  | 436.93  | 468.61  | 41.24  | 329.85  |
| -1.11 | -1.72     | -289.44 | 1119.74 | 1094.8  | 1106.8  | 44.63  | 685.6   |
| 0.87  | 1.27      | 98.21   | 1488.83 | 1530.57 | 1510.57 | 42.02  | 2895.7  |
| 1.05  | 1.3       | 355.83  | 2096.77 | 2090.8  | 2093.23 | 36.95  | 1358.16 |
| 0.85  | 1.19      | 6.65    | 362.71  | 363.67  | 363.16  | 10.85  | 629.42  |
| -0.9  | -1.14     | -5.76   | 538.49  | 561.76  | 548.01  | 24.04  | 780.05  |
| -0.98 | -1.13     | -74.17  | 1436.61 | 1466.58 | 1453.53 | 37.55  | 1001.76 |
| -0.86 | -1.42     | -13.93  | 158.45  | 175.26  | 167.04  | 12.95  | 108.37  |
| -0.83 | -1.72     | -56.12  | 429.03  | 338.73  | 383.66  | 49.92  | 732.27  |
| -0.99 | -1.35     | -121.98 | 939.65  | 963.78  | 951.04  | 22.38  | 629     |
| -1.07 | -1.36     | -88.68  | 502.91  | 542.89  | 523.53  | 25.62  | 287.49  |
| 0.79  | 1.64      | 19.44   | 109.97  | 109.54  | 109.8   | 11.94  | 151.5   |
| -1.11 | -1.47     | -335.68 | 1646.77 | 1487.86 | 1565.21 | 90.33  | 1191.8  |
| 1.11  | 1.43      | 64.5    | 240.19  | 248.92  | 245.5   | 12.84  | 107.63  |
| -1.13 | -1.84     | -144.92 | 492.39  | 506.87  | 501.38  | 14.05  | 241.18  |
| -0.84 | -1.41     | -23.9   | 207.33  | 270.31  | 239.15  | 32.5   | 102.03  |
| 0.89  | 1.19      | 21.35   | 589.19  | 579.28  | 584.84  | 14.94  | 208.09  |
| 0.69  | 1.46      | 5.06    | 109.85  | 119.37  | 116.55  | 12.35  | 118.59  |
| 0.79  | 1.6       | 68.51   | 403.28  | 357.68  | 380.47  | 25.62  | 39.06   |
| -1.13 | -1.42     | -89.36  | 442.54  | 406.51  | 422.03  | 22.67  | 276.73  |
| -0.93 | -2.26     | -963.49 | 2911.29 | 3817.99 | 3352.34 | 510.52 | 1050.43 |
| -0.98 | -2.28     | -9.88   | 28.22   | 35.92   | 31.65   | 4.48   | 14.19   |
| -1.04 | -2.06     | -26.08  | 95.34   | 85.53   | 90.2    | 6.77   | 49.65   |
| -1    | -1.47     | -36.5   | 203.92  | 218.23  | 211.27  | 14.35  | 340.99  |
| 1.29  | 2.05      | 35.84   | 63.16   | 53.61   | 58.74   | 6.77   | 72.35   |
| -1.12 | -1.49     | -38.42  | 178.08  | 173.61  | 176.04  | 5.8    | 116.6   |
| 0.08  | 2.21      | 6.59    | 50.17   | 51.78   | 50.98   | 4.02   | 23.6    |
| 1.08  | 1.46      | 30.38   | 114.17  | 116.59  | 115.33  | 4.37   | 71.48   |
| 1.3   | 100000000 | 12.3    | 2.83    | 2.64    | 2.71    | 3.71   | 17.81   |
| -0.98 | -1.56     | -22.01  | 127.34  | 123.91  | 125.6   | 7.78   | 70.39   |
| 0.98  | 1.28      | 37.64   | 290.16  | 302.53  | 296.67  | 12.36  | 526.44  |
| 1.92  | 16.2      | 24.38 * | 12.8    | 6.93    | 9.35    | 4.41   | 24.69   |
| 1.14  | 1.59      | 127.01  | 350.31  | 351.99  | 351.14  | 8.55   | 565.45  |
| 1.31  | 1.75      | 834.77  | 1533.24 | 1746.29 | 1640.26 | 116.41 | 2432.32 |
| -0.8  | -3.21     | -10.3   | 43.3    | 38.75   | 40.82   | 4.97   | 14.33   |

|       |         |          |         |         |         |        |         |
|-------|---------|----------|---------|---------|---------|--------|---------|
| -1    | -1.6    | -445.3   | 2205.41 | 2410.28 | 2317.35 | 109.44 | 1315.41 |
| -1    | -1.26   | -231.75  | 2213.18 | 2205.45 | 2210.4  | 64.1   | 1212.07 |
| -1.15 | -1.48   | -369.15  | 1640.81 | 1447.87 | 1541.2  | 108.2  | 1231.44 |
| -0.93 | -1.18   | -168.67  | 3764.94 | 3827.43 | 3802.2  | 173.07 | 2646.04 |
| -1.19 | -1.76   | -88.48   | 308.89  | 269.89  | 289.23  | 21.19  | 208.13  |
| 0.97  | 1.33    | 42.12    | 307.58  | 299.09  | 302.61  | 16.07  | 551.29  |
| -0.91 | -1.15   | -9.53    | 395.92  | 424.74  | 411.02  | 19.93  | 625.78  |
| 0.74  | 1.63    | 33.33    | 439.95  | 316.84  | 377.33  | 65.75  | 1069.64 |
| 0.96  | 1.32    | 100.16   | 719.93  | 762.45  | 740.61  | 31.3   | 1202.93 |
| 0.93  | 1.29    | 30.17    | 325.94  | 376.7   | 349.88  | 30.76  | 156.18  |
| 0.84  | 1.93    | 368.64   | 1119.15 | 950.29  | 1032.04 | 91.16  | 2073.92 |
| -1.32 | -2.78   | -122.16  | 245.12  | 292.71  | 268.93  | 25.66  | 167.5   |
| 0.8   | 1.33    | 40.24    | 630.82  | 645.55  | 639.71  | 13.6   | 439.08  |
| -0.94 | -1.15   | -23.75   | 654.54  | 623.98  | 639.18  | 22.08  | 459.35  |
| -0.88 | -1.17   | -2.21    | 252.98  | 237.86  | 245.06  | 12.56  | 465.7   |
| -1.06 | -1.29   | -105.73  | 718.61  | 753.49  | 736.94  | 20.87  | 456.21  |
| -0.85 | -1.47   | -33.07   | 440.44  | 465.45  | 453.13  | 15.81  | 755.16  |
| 0.87  | 1.23    | 9.49     | 385.43  | 467.95  | 427     | 41.61  | 195.42  |
| 0.93  | 1.25    | 8.67     | 129.47  | 125.14  | 126.7   | 10.37  | 40.9    |
| 0.99  | 1.29    | 77.63    | 587.39  | 556.59  | 570.25  | 23.74  | 158.04  |
| 0.92  | 1.24    | 23.23    | 318.74  | 323.53  | 320.76  | 14.91  | 225.99  |
| 1.22  | 1.71    | 102.5    | 215.9   | 258.62  | 237.26  | 22.09  | 22.29   |
| 0.86  | 1.21    | 7.33     | 261.62  | 246.59  | 253.66  | 13.75  | 205.03  |
| -0.84 | -1.89   | -5.69    | 37.53   | 35.3    | 36.44   | 3.01   | 49.71   |
| -1.23 | -2.31   | -24.53   | 64.72   | 64.18   | 64.46   | 3.31   | 40.8    |
| -3.18 | -155.72 | -21.25 * | 24.02   | 26.09   | 25.11   | 3.17   | 3.75    |
| -0.84 | -1.28   | -3.48    | 74.49   | 85.13   | 81.06   | 8.27   | 39.1    |
| 1.19  | 1.71    | 61.35    | 136.46  | 161.55  | 148.19  | 13.67  | 276.33  |
| -1.01 | -1.85   | -141.08  | 471.92  | 592.75  | 531.6   | 63.48  | 198.19  |
| 0.7   | 5.65    | 10.88    | 15.23   | 22.01   | 19.85   | 8.64   | 21.44   |
| -0.76 | -2.51   | -60.92   | 177.61  | 280.47  | 228.04  | 52.58  | 430.49  |
| 0.85  | 1.33    | 1.7      | 29.02   | 30.92   | 30.22   | 3.23   | 17.09   |
| -0.81 | -1.37   | -2       | 49.92   | 53.7    | 51.3    | 4.8    | 81.84   |
| -0.62 | -2.05   | -0.4     | 29.35   | 23.44   | 26.19   | 3.82   | 26.06   |
| 1.28  | 8.78    | 16.63    | 7.67    | 16.47   | 12.29   | 5.45   | 18.13   |
| 0.88  | 1.24    | 56.03    | 1096.36 | 1216.03 | 1156.78 | 70.6   | 1816.29 |

|       |        |         |         |         |         |        |         |
|-------|--------|---------|---------|---------|---------|--------|---------|
| 0.9   | 1.5    | 6.71    | 44.29   | 37.67   | 40.65   | 4.3    | 24.96   |
| 0.9   | 1.15   | 11.36   | 635.3   | 715.21  | 675.59  | 41.61  | 380.65  |
| 0.93  | 1.62   | 9.77    | 42.11   | 40.28   | 41.24   | 4.31   | 65.91   |
| -1.12 | -1.62  | -31.25  | 129.31  | 113.84  | 121.36  | 9.82   | 63.84   |
| 1.23  | 1.46   | 81.92   | 239.89  | 247.75  | 242.33  | 9.75   | 121.48  |
| 1.1   | 3.6    | 11.76   | 12.04   | 16.2    | 13.83   | 3.89   | 55.14   |
| 0.99  | 1.22   | 88.1    | 899.8   | 885.96  | 890.89  | 20.37  | 649.19  |
| -1.17 | -1.49  | -880.32 | 3803.97 | 3376.66 | 3593.62 | 229.87 | 2910.45 |
| -0.91 | -2.21  | -33     | 145.57  | 129.86  | 138.7   | 12.1   | 86.61   |
| -1.02 | -1.35  | -36.22  | 250.01  | 239.52  | 245.81  | 13.01  | 120.12  |
| -0.85 | -1.41  | -36.12  | 556.64  | 599.33  | 576.63  | 29.01  | 384.19  |
| 0.92  | 1.23   | 35.36   | 496.71  | 505.9   | 499.72  | 15.94  | 271.2   |
| 0.34  | 1.93   | 1.92    | 47.76   | 51.36   | 49.21   | 8.73   | 89.34   |
| -1.08 | -2.48  | -30.57  | 83.68   | 87.81   | 85.7    | 9.03   | 42.19   |
| 0.86  | 1.27   | 36.56   | 592.13  | 603     | 596.62  | 17.35  | 858.04  |
| -1.01 | -1.85  | -98.75  | 389.18  | 431.94  | 410.63  | 23.52  | 203     |
| -1.11 | -1.42  | -140.59 | 719.38  | 643.77  | 682.64  | 42.97  | 460.18  |
| -1.2  | -1.61  | -94.7   | 302.84  | 356.46  | 329.96  | 27.37  | 207.8   |
| -0.89 | -1.27  | -6.92   | 121.49  | 118.53  | 119.77  | 8.11   | 63.7    |
| -1.4  | -3.28  | -38.89  | 83.89   | 69.03   | 76.54   | 8.81   | 39.46   |
| -0.89 | -1.45  | -42.99  | 283.23  | 359.92  | 321.53  | 39.61  | 151.97  |
| -0.74 | -1.78  | -5.18   | 76.32   | 86.44   | 80.88   | 7.23   | 45.43   |
| 0.93  | 1.23   | 103.37  | 1338.51 | 1414.01 | 1376    | 44.3   | 1951.82 |
| -1.17 | -1.45  | -138.65 | 612.19  | 597.64  | 605.36  | 19.42  | 418.99  |
| -0.99 | -1.36  | -32.8   | 246.56  | 224.73  | 236.12  | 16.73  | 151.88  |
| 1.04  | 1.22   | 169.89  | 1342.21 | 1452.15 | 1397.64 | 59.09  | 759.96  |
| -0.91 | -1.13  | -5.87   | 484.45  | 486.29  | 485.42  | 18.46  | 253.77  |
| -1.11 | -1.53  | -135.42 | 613.85  | 603.69  | 609     | 15.47  | 468.54  |
| -0.61 | -14.95 | -15.65  | 40.16   | 66.08   | 52.68   | 13.58  | 95.73   |
| -0.9  | -1.23  | -10.94  | 255.33  | 259.83  | 257.19  | 10.18  | 170.47  |
| 1.11  | 3.49   | 37.99   | 40.17   | 29.85   | 35.11   | 6.62   | 15.78   |
| 1.01  | 1.33   | 26.79   | 168.84  | 162.45  | 165.39  | 9.2    | 240.65  |
| -1.04 | -1.49  | -54.36  | 268.94  | 294     | 281.17  | 17.4   | 171.3   |
| -1.12 | -1.86  | -50.14  | 176.36  | 146.01  | 162.23  | 18.34  | 129.41  |
| 0.79  | 1.31   | 19.73   | 409.36  | 417.94  | 415.08  | 15.57  | 168.13  |
| 0.95  | 1.29   | 18.37   | 164.28  | 174.38  | 169.65  | 10.35  | 241.83  |

|       |            |          |         |        |         |       |         |
|-------|------------|----------|---------|--------|---------|-------|---------|
| -0.98 | -1.53      | -30.19   | 150.95  | 179.82 | 165.33  | 16.03 | 61.34   |
| 0.83  | 1.35       | 5.16     | 97.97   | 85.24  | 91.11   | 9.11  | 45.85   |
| -1.07 | -2.36      | -48.75   | 118.41  | 153.89 | 136.54  | 18.97 | 59.43   |
| -0.86 | -1.53      | -18.92   | 134.17  | 165.62 | 149.58  | 18.13 | 60.37   |
| 1.15  | 2.09       | 35.21    | 60.99   | 75.29  | 67.44   | 10.06 | 27.08   |
| 1.22  | 2.19       | 18.65    | 27.39   | 32.02  | 29.7    | 3.85  | 49.77   |
| 1.13  | 1.59       | 130.27   | 361.08  | 402.97 | 383.92  | 27.86 | 113.41  |
| -0.96 | -1.52      | -48.52   | 289.11  | 223.17 | 255.82  | 34.12 | 164.99  |
| -1.13 | -1.59      | -35.5    | 143.77  | 137.94 | 141.39  | 9.33  | 362.79  |
| -1.15 | -2.1       | -19.6    | 59.94   | 53.81  | 56.82   | 5.42  | 106.92  |
| -0.82 | -1.31      | -1.91    | 66      | 65.67  | 65.82   | 5.62  | 125.23  |
| -0.76 | -1.44      | -10.71   | 211.16  | 274.17 | 242.39  | 32.97 | 74.48   |
| 1.08  | 1.4        | 86.53    | 393.86  | 357.03 | 375.71  | 23.25 | 612.46  |
| -1.27 | -2.07      | -58.69   | 164.4   | 149.16 | 156.92  | 10.56 | 90.43   |
| -0.94 | -1.21      | -5.85    | 95.07   | 96.2   | 95.5    | 4.84  | 65.95   |
| -0.8  | -1.28      | -1.47    | 104.77  | 125.46 | 114.92  | 11.62 | 64.78   |
| -1.29 | -1.99      | -63.59   | 176.64  | 162.91 | 171.82  | 12.93 | 158.98  |
| -0.87 | -1.25      | -5.47    | 156.66  | 149    | 152.48  | 9.11  | 110.48  |
| -1.03 | -1.43      | -116.19  | 682.49  | 692.78 | 687.7   | 28.83 | 377.05  |
| -0.89 | -1.43      | -9.65    | 80.62   | 92.97  | 87.73   | 7.79  | 46.8    |
| -1.09 | -3.31      | -93.46   | 235.72  | 240.42 | 237.73  | 7.52  | 152.37  |
| -0.94 | -2.39      | -17.56   | 64.68   | 63.75  | 64.32   | 5.82  | 21.74   |
| -1.19 | -2.42      | -51.95   | 141.66  | 133.69 | 137.57  | 8.14  | 95.6    |
| -0.87 | -1.23      | -6.5     | 262.05  | 243.44 | 252.37  | 11.77 | 165.37  |
| -2.15 | -100000000 | -31.14 * | 35.09   | 40.65  | 37.86   | 4.84  | 3.61    |
| -0.96 | -1.3       | -88.42   | 804.33  | 888.44 | 849.85  | 46.42 | 823.21  |
| -0.6  | -2.64      | -5.84    | 46.82   | 70.96  | 59.4    | 12.59 | 26.34   |
| -0.66 | -100000000 | -9.87    | 28.18   | 33.33  | 30.38   | 3.78  | 18.12   |
| 1.05  | 1.9        | 220.96   | 502.39  | 455.85 | 480.08  | 27.54 | 371.37  |
| 0.97  | 2.4        | 82.35    | 155.26  | 257.04 | 205.86  | 51.61 | 47.91   |
| 1.07  | 1.82       | 112.92   | 266.25  | 350.52 | 308.14  | 43.28 | 91.03   |
| 1.01  | 1.33       | 96.74    | 587.97  | 586.4  | 587.07  | 22.32 | 554.79  |
| -0.83 | -4.64      | -19.98   | 48.92   | 61.87  | 54.8    | 10.88 | 26.2    |
| 0.89  | 1.22       | 82.65    | 1596.96 | 1611.8 | 1607.19 | 35.79 | 1993.92 |
| 0.89  | 1.21       | 30.9     | 691.44  | 672.62 | 682.44  | 15.12 | 696.49  |
| -0.45 | -100000000 | -3       | 8.85    | 8.94   | 8.9     | 2.48  | 7.08    |

|       |            |         |          |          |         |        |          |
|-------|------------|---------|----------|----------|---------|--------|----------|
| 1.01  | 1.25       | 52.17   | 424.6    | 413.26   | 418.86  | 15.14  | 314.26   |
| 0.87  | 1.34       | 3.53    | 55.52    | 52.81    | 54.18   | 6.08   | 40.65    |
| -0.7  | -1.51      | -0.03   | 25.61    | 28.74    | 26.61   | 3.4    | 32.33    |
| 0     | -7.78      | -2.95   | 8.18     | 19.89    | 13.63   | 9.17   | 13.65    |
| -0.14 | -3.05      | 0       | 6.51     | 12.34    | 8.72    | 4.55   | 8.36     |
| -0.37 | -5.02      | -1.57   | 12.77    | 21.68    | 17.44   | 6.52   | 18.69    |
| 0.86  | 1.19       | 25.88   | 1201.63  | 1144.36  | 1170.61 | 46.44  | 1707.24  |
| -0.83 | -1.36      | -77.4   | 2111.78  | 2271.54  | 2193.43 | 84.49  | 2536.68  |
| 0.93  | 1.37       | 131.64  | 1063.57  | 1336.46  | 1199.74 | 137.42 | 1604.2   |
| -1.12 | -100000000 | -19     | 35.3     | 21.83    | 28.14   | 7.47   | 9.84     |
| 0.26  | 2.5        | 3.06    | 27.75    | 31.76    | 29.68   | 8.05   | 18.61    |
| -0.71 | -1.51      | -1.74   | 37.06    | 42.3     | 40.03   | 6.79   | 45.01    |
| 0.88  | 1.16       | 6.84    | 357.91   | 362.8    | 359.81  | 10.67  | 209.44   |
| -0.65 | -2.83      | -5.84   | 22.23    | 12.74    | 17.96   | 5.88   | 7.45     |
| 0.55  | 3.13       | 4.06    | 14.42    | 29.54    | 23      | 8.41   | 24.33    |
| -0.96 | -1.1       | -329.14 | 12111.43 | 12629.35 | 12359.2 | 310.95 | 12521.72 |
| -1.04 | -1.4       | -137.71 | 754.58   | 842.3    | 796.16  | 47.38  | 664.58   |
| 0.62  | 2.06       | 4.28    | 28.01    | 22.2     | 25.04   | 5.4    | 15.56    |
| -0.73 | -1.81      | -39.9   | 171.18   | 271.27   | 220.65  | 51.09  | 97.52    |
| 0     | 100000000  | 10.09   | 4.63     | 4.1      | 4.39    | 2.8    | 8.72     |
| 0.47  | 2.83       | 1.35    | 15.04    | 18.68    | 16.94   | 6.06   | 15.84    |
| 0.74  | 1.41       | 0.96    | 54.78    | 45.33    | 49.81   | 6.72   | 66.94    |
| -1.06 | -1.44      | -81.28  | 435.18   | 430.76   | 433.2   | 19.26  | 915.14   |
| 0.7   | 100000000  | 14.87   | 42.16    | 6.17     | 24.14   | 18.29  | 45.88    |
| -0.78 | -1.91      | -64.81  | 650.06   | 657.97   | 652.76  | 14.94  | 630.65   |
| -0.91 | -1.14      | -112.77 | 4883.46  | 4355.83  | 4604.95 | 288.71 | 4412.57  |
| 0.95  | 1.11       | 146.68  | 5752.72  | 5436.86  | 5578.98 | 198.8  | 5876.25  |
| -0.87 | -1.17      | -1.55   | 281.5    | 271.11   | 274.17  | 13.27  | 241.97   |
| 0.82  | 2.46       | 91.19   | 165.16   | 240.14   | 202.29  | 42.19  | 52.28    |
| -0.81 | -2.03      | -24.84  | 86.17    | 125.13   | 106.34  | 21.89  | 45.43    |
| 0.96  | 1.67       | 87.86   | 313.71   | 383.22   | 347.09  | 45.75  | 487.38   |
| 0     | 100000000  | 1.35    | 3.07     | 6.05     | 4.29    | 3.37   | 3.36     |
| 0.81  | 1.39       | 5.1     | 60.54    | 65.6     | 62.75   | 5.03   | 70.55    |
| -0.91 | -1.33      | -24.7   | 223.39   | 270.66   | 246.72  | 24.26  | 155.24   |
| -0.78 | -1.29      | -2.44   | 118.65   | 92.1     | 105.74  | 14.39  | 80.84    |
| -0.68 | -1.73      | -3.11   | 45.41    | 63.47    | 54.52   | 9.5    | 76.26    |



|       |            |          |         |         |         |        |         |
|-------|------------|----------|---------|---------|---------|--------|---------|
| -1.13 | -2.73      | -19.4    | 44.53   | 50.43   | 47.33   | 6.79   | 39.11   |
| 1     | 1.63       | 119.59   | 418.58  | 549.17  | 482.36  | 67.44  | 672.62  |
| 0.28  | 6.31       | 1.66     | 3.07    | 2.36    | 2.83    | 1.24   | 3.62    |
| -1.01 | -1.16      | -562.54  | 7428.98 | 7322.28 | 7358.43 | 108.6  | 5790.27 |
| 1.3   | 100000000  | 29.43    | 25.74   | 3.73    | 14.92   | 11.39  | 12.35   |
| -0.99 | -1.09      | -253.48  | 6990.16 | 6789.82 | 6878.7  | 140.86 | 5923.32 |
| 0.32  | 1.96       | 0.01     | 21.68   | 20.21   | 21      | 4.46   | 23.3    |
| 0.85  | 1.46       | 14.5     | 111.92  | 107.96  | 110.17  | 9.47   | 94.11   |
| -0.78 | -2.56      | -4.41    | 22.48   | 19.32   | 20.74   | 2.96   | 12.38   |
| -0.94 | -1.52      | -15.06   | 92.22   | 104.81  | 98.81   | 8.15   | 56.49   |
| -0.84 | -1.5       | -4.76    | 44.79   | 42.02   | 43.91   | 5.32   | 26.19   |
| 0.27  | 100000000  | 6.52     | 13.92   | 12.91   | 13.45   | 8.47   | 14.07   |
| 0.56  | 3.04       | 6.48     | 10.75   | 11.68   | 11.08   | 2.33   | 13.62   |
| -1.24 | -3.29      | -768.89  | 1831.05 | 1264.25 | 1546.94 | 287.86 | 340.69  |
| 0     | -100000000 | -1.71    | 4.98    | 9.07    | 6.74    | 6.98   | 11.94   |
| -0.92 | -1.59      | -47      | 272.6   | 205.56  | 239.8   | 35.89  | 649.45  |
| -0.96 | -1.4       | -246.37  | 1928.43 | 1894.14 | 1916.53 | 88.27  | 1908.33 |
| -0.98 | -1.63      | -13.5    | 56.95   | 68.66   | 63.03   | 7.25   | 21.13   |
| -1.23 | -2.39      | -36.13   | 92.53   | 91.44   | 91.95   | 6.61   | 222.85  |
| -0.78 | -1.54      | -16.24   | 135.3   | 185.67  | 160.71  | 25.66  | 36.83   |
| 1.11  | 2.41       | 163.1    | 301.06  | 230.76  | 263.57  | 45.41  | 518.89  |
| -0.91 | -1.47      | -86.79   | 527.68  | 676.34  | 602.9   | 74.39  | 485.11  |
| -1.86 | -21.52     | -28.78 * | 38.72   | 41.39   | 39.92   | 5.07   | 12.11   |
| -1.57 | -100000000 | -32.6 *  | 48.29   | 44.07   | 46.11   | 4.45   | 32.71   |
| -0.77 | -2.43      | -83.72   | 269.23  | 408.12  | 337.74  | 70.64  | 60.83   |
| 0.94  | 1.15       | 16.94    | 395.07  | 386.08  | 390.33  | 11.32  | 549.13  |
| 0.71  | 1.73       | 34.94    | 164.18  | 160.87  | 162.84  | 6.26   | 84.98   |
| -1.21 | -2.27      | -19.87   | 42.85   | 55.28   | 49.29   | 7.16   | 23.67   |
| 0.9   | 1.45       | 12.74    | 90      | 112.65  | 102.16  | 12.63  | 48.32   |
| 0     | 2.65       | 1        | 9.15    | 8.82    | 9.06    | 2.1    | 22.89   |
| -0.73 | -1.75      | -3.82    | 44.81   | 36.38   | 40.81   | 6.27   | 47.14   |
| -0.49 | -2.5       | -5.98    | 34.88   | 61.84   | 47.92   | 15.5   | 38.28   |
| -0.22 | -2.08      | -0.21    | 7.71    | 19.31   | 13.23   | 6.29   | 8.46    |
| -0.75 | -1.29      | -0.37    | 373.02  | 493.69  | 433.3   | 61.46  | 196.91  |
| 0.89  | 1.55       | 13.27    | 74.32   | 81.39   | 76.98   | 9.37   | 34.83   |
| 2.28  | 7.65       | 62.1 *   | 24.64   | 23.22   | 23.86   | 7.6    | 27.41   |

|       |            |          |        |        |        |       |        |
|-------|------------|----------|--------|--------|--------|-------|--------|
| -1.37 | -4.99      | -19.74   | 40.03  | 29.62  | 34.93  | 5.52  | 7.29   |
| 0.84  | 1.71       | 39.89    | 192.23 | 246.21 | 216.11 | 34.72 | 68.31  |
| -0.73 | -100000000 | -19.68   | 41.77  | 20     | 31.14  | 11.46 | 4.12   |
| -0.83 | -2         | -15.02   | 53.16  | 74.36  | 63.3   | 12.63 | 20.35  |
| 0.89  | 2.77       | 20.94    | 30.53  | 38.99  | 34.84  | 7.46  | 15.37  |
| 0.72  | 1.41       | 0.56     | 41.57  | 48.99  | 45.44  | 6.16  | 10.18  |
| 0.85  | 1.33       | 0.94     | 18.83  | 20.92  | 20.25  | 2.5   | 10.1   |
| -1.96 | -37.49     | -25.05 * | 36.04  | 30.08  | 33.2   | 5.82  | 36.39  |
| -0.89 | -2.07      | -7.55    | 29.48  | 31.79  | 30.55  | 4.5   | 7.47   |
| 1.17  | 1.56       | 39.42    | 112.97 | 109.56 | 111.35 | 6.46  | 31.87  |
| -0.87 | -1.27      | -16.88   | 247.88 | 303.29 | 274.91 | 29.47 | 149.73 |
| -1.55 | -3.68      | -47.72 * | 72.85  | 95.14  | 83.8   | 12.42 | 33.1   |
| -1.88 | -3.43      | -75.7 *  | 140.72 | 107.86 | 123.79 | 17.8  | 112.35 |
| 0.57  | 100000000  | 2.85     | 2.35   | 13.56  | 8.02   | 5.77  | 11.84  |
| 0.57  | 3.19       | 3.42     | 41.31  | 19.19  | 30.35  | 11.79 | 38.62  |
| 0.89  | 1.53       | 31.64    | 186.41 | 245.02 | 215.26 | 30.18 | 86.79  |
| -1.54 | -2.74      | -39.38 * | 78.75  | 78.73  | 78.74  | 5.84  | 55.07  |
| 1.71  | 5.77       | 15.96    | 10.23  | 6.78   | 9.13   | 2.86  | 50.61  |
| -0.62 | -1.72      | -0.59    | 33.31  | 29.2   | 31.07  | 6.26  | 151.49 |
| 0.93  | 4.5        | 6.79     | 10.17  | 11.2   | 10.54  | 4.02  | 29.98  |
| -1.71 | -3.32      | -154 *   | 302.53 | 215.95 | 259.11 | 45.26 | 273.26 |
| -1.72 | -3.2       | -36.26 * | 69.28  | 57.43  | 63.89  | 7.13  | 45.47  |
| -1.82 | -3.85      | -28.23 * | 50.52  | 42.63  | 46.6   | 4.69  | 11.88  |
| 1.66  | 6.48       | 29.93 *  | 10.88  | 18.83  | 14.69  | 4.5   | 21.54  |
| -1.18 | -2.7       | -20.11   | 36.58  | 51.94  | 44.53  | 8.56  | 15.64  |
| -0.61 | -1.56      | -0.89    | 39.65  | 26.9   | 32.85  | 7.77  | 8.43   |
| 0     | 100000000  | 2.53     | 6.02   | 1.23   | 3.65   | 3.21  | 43.75  |
| 0.63  | 2.5        | 1.95     | 22.26  | 14.25  | 18.32  | 6.02  | 22.63  |
| 1.72  | 100000000  | 14.22    | 5.99   | 2.27   | 3.67   | 3.61  | 33.34  |
| 1.83  | 17.6       | 21.93 *  | 6.58   | 9.11   | 7.55   | 3.55  | 13.52  |
| 0     | 100000000  | 5.83     | 1      | 4.2    | 2.06   | 2.49  | 35.08  |
| 1.87  | 100000000  | 16.38    | 2.19   | 7.09   | 4.12   | 3.26  | 25.19  |
| -0.68 | -1.54      | -2.05    | 30.01  | 28.74  | 29.42  | 6.21  | 83.78  |
| 0.92  | 1.27       | 34.5     | 412.32 | 478.34 | 445.08 | 34.49 | 237.78 |
| 0     | -100000000 | -0.09    | 3      | 3.22   | 3.11   | 4.66  | 1.85   |
| -0.82 | -1.79      | -7.74    | 46.45  | 49.85  | 48.1   | 6.78  | 23.66  |

|       |            |           |         |         |         |        |         |
|-------|------------|-----------|---------|---------|---------|--------|---------|
| -0.91 | -1.24      | -151.1    | 2793.55 | 3068.04 | 2930.32 | 139.32 | 4436.69 |
| -1.53 | -2.56      | -24.71 *  | 47.45   | 51.72   | 50.32   | 4.85   | 50.11   |
| -1.24 | -11.9      | -44.93    | 48.58   | 86.96   | 68.71   | 19.78  | 23.85   |
| 2.2   | 16.31      | 22.27 *   | 9.66    | 5.15    | 7.05    | 3.18   | 12.31   |
| -0.78 | -1.67      | -7.78     | 96.26   | 99.88   | 97.77   | 9.11   | 27.94   |
| -0.87 | -4.87      | -20.67    | 49.71   | 65.4    | 57.25   | 8.35   | 50.85   |
| 0.98  | 2.39       | 55.41     | 112.47  | 103.38  | 108.61  | 21.42  | 162.15  |
| -0.81 | -1.67      | -4.68     | 34.39   | 39.19   | 37.41   | 4.77   | 30.14   |
| 2.74  | 9.13       | 21.47 *   | 5.82    | 6.63    | 6.2     | 1.88   | 11.44   |
| -0.65 | -2.75      | -15.45    | 78.72   | 45.43   | 62.08   | 17.16  | 51.04   |
| 1.63  | 4.72       | 22.74 *   | 15.78   | 13.27   | 14.95   | 4.13   | 24.28   |
| 0.31  | 3.77       | 2.26      | 7.08    | 10.99   | 8.49    | 3.18   | 31.75   |
| 0.23  | 100000000  | 0.86      | 3.84    | 6.56    | 4.63    | 3.03   | 4.1     |
| -0.86 | -1.49      | -5.15     | 43.89   | 48.99   | 47.14   | 4.89   | 21.89   |
| 0.9   | 7.07       | 15.06     | 10.57   | 16.69   | 13.26   | 5.49   | 37.33   |
| 1.76  | 100000000  | 24.01 *   | 11.42   | 5.32    | 7.69    | 5.66   | 9.29    |
| -1.52 | -3.32      | -28.89 *  | 46.7    | 59.58   | 52.76   | 7.6    | 33.87   |
| 0.71  | 1.52       | 2.4       | 58.94   | 60.08   | 59.57   | 9.27   | 148.06  |
| -0.73 | -2.92      | -26.47    | 116.06  | 155.21  | 135.45  | 20.75  | 45.99   |
| 3.04  | 13.29      | 22.96 *   | 5.35    | 5.54    | 5.46    | 2      | 27.36   |
| -0.85 | -1.89      | -34.87    | 145.41  | 197.73  | 171.6   | 27.07  | 76.83   |
| 0     | 3.34       | 2.42      | 14.8    | 10.09   | 12.83   | 4.18   | 58.54   |
| 0.64  | 1.76       | 1.13      | 43.09   | 28.6    | 35.62   | 8.17   | 40.51   |
| -3.4  | -100000000 | -20.9 *   | 13.47   | 31.48   | 22.26   | 9.22   | 10.18   |
| -1.6  | -5.24      | -21.02 *  | 38.34   | 29.6    | 33.89   | 5.37   | 47.96   |
| -1.56 | -8.88      | -25.27 *  | 29.77   | 45.87   | 37.46   | 8.43   | 15.11   |
| -1.71 | -3.01      | -115.78 * | 233.27  | 174.08  | 203.71  | 30.37  | 91.11   |
| -1.75 | -2.66      | -23.57 *  | 44.01   | 44.72   | 44.44   | 2.52   | 59.1    |
| 1.59  | 3.38       | 33.84 *   | 25.11   | 28.47   | 26.61   | 4.75   | 33.37   |
| -1.65 | -9.07      | -26.13 *  | 35.32   | 44.32   | 39.59   | 5.34   | 30.17   |
| -0.76 | -4.64      | -11.07    | 45.95   | 40.46   | 43.28   | 4.49   | 12.07   |
| -0.62 | -8.44      | -4.88     | 23.6    | 29.49   | 26.33   | 3.74   | 1.24    |
| -1    | -4.4       | -15.49    | 40.26   | 30.85   | 36.03   | 5.7    | 15.26   |
| 0.95  | 1.76       | 8.31      | 27.88   | 26.45   | 27.09   | 3.05   | 33.55   |
| 0     | -100000000 | -25.24    | 60.85   | 4.97    | 32.78   | 28.76  | 25.61   |
| -0.84 | -1.38      | -2.05     | 44.38   | 42.09   | 43.08   | 1.99   | 62.58   |

|       |            |           |        |        |        |       |        |
|-------|------------|-----------|--------|--------|--------|-------|--------|
| 1.85  | 6.7        | 21.82 *   | 6.99   | 11.63  | 9.54   | 2.78  | 10.43  |
| 1.59  | 4.96       | 25.27 *   | 15.72  | 17.32  | 16.3   | 4.66  | 17.03  |
| 0.71  | 1.33       | 0.6       | 51.31  | 52.02  | 51.83  | 3.26  | 45.3   |
| -0.77 | -2.35      | -39.95    | 122.39 | 190.07 | 155.93 | 34.96 | 46.53  |
| 2.57  | 100000000  | 24.43 *   | 1.24   | 7.41   | 4.2    | 3.21  | 1.5    |
| -1.56 | -3.67      | -101.19 * | 151.89 | 202.34 | 176.99 | 26.64 | 100.89 |
| -0.74 | -3.48      | -46.86    | 113.72 | 186.25 | 149.97 | 36.24 | 34.91  |
| 2.69  | 66.24      | 23.26 *   | 8.13   | 3.25   | 5.36   | 2.99  | 14.03  |
| -1.61 | -5.36      | -28.6 *   | 46.78  | 47.62  | 47.16  | 4.36  | 15.5   |
| -0.81 | -2.65      | -5.99     | 27.79  | 25.77  | 26.83  | 3.15  | 53.16  |
| -0.12 | -52.12     | -2.72     | 13.41  | 14.15  | 13.91  | 7.59  | 7.74   |
| 0     | 100000000  | 4.96      | 3.01   | 9.06   | 6.09   | 4.41  | 32.24  |
| 0.52  | 1.72       | 2.27      | 25.6   | 25.4   | 25.52  | 2.54  | 58.59  |
| -1.16 | -2.64      | -19.16    | 40.84  | 52.28  | 46.98  | 6.19  | 4.14   |
| -1.09 | -3.71      | -13.41    | 34     | 27.43  | 30.05  | 4.78  | 43.47  |
| 1.85  | 1435.96    | 25.92 *   | 8.07   | 7.41   | 7.72   | 4.68  | 7.16   |
| 0     | 100000000  | 30.44     | 5.59   | 4.82   | 5.21   | 5.59  | 76.89  |
| 0.49  | 2.51       | 2.29      | 13.4   | 14.01  | 13.83  | 3.95  | 14.3   |
| -0.52 | -1.65      | -0.87     | 21.8   | 36.67  | 29.22  | 8.57  | 1.66   |
| -0.7  | -100000000 | -15.2     | 41.81  | 29.33  | 35.09  | 7.57  | 24.19  |
| 1.78  | 17.83      | 24.93 *   | 12.85  | 8.23   | 10.47  | 5.15  | 16.85  |
| 0.78  | 3.24       | 12.12     | 18.96  | 13.54  | 16.22  | 3.55  | 45.68  |
| -1.1  | -2.4       | -47.96    | 96.05  | 140.91 | 118.08 | 23.16 | 35.26  |
| 0.87  | 1.43       | 3.98      | 37.22  | 36.42  | 36.76  | 4.28  | 43.55  |
| 0.74  | 2.83       | 17.28     | 23.36  | 28.11  | 25.21  | 3.61  | 55.08  |
| 2.3   | 100000000  | 20.97 *   | 1.17   | 6.46   | 3.49   | 3.38  | 10.58  |
| 0.88  | 1.26       | 5.61      | 123.85 | 146.51 | 134.82 | 12.72 | 45.77  |
| 0.89  | 1.39       | 23.25     | 195.38 | 201    | 198.2  | 17.76 | 154.83 |

| BKM120B70 | experiment 1 | experiment 2 | fold change | lower bound | upper bound | difference of | filtered | DMSOA70 |
|-----------|--------------|--------------|-------------|-------------|-------------|---------------|----------|---------|
| 261.35    | 222.63       | 38.88        | -1.9        | -1.45       | -2.69       | -200.62       |          | 400.58  |
| 426.79    | 425.75       | 13.55        | -1.53       | -1.41       | -1.66       | -227.6        |          | 631.61  |
| 1087.42   | 1059.52      | 34.9         | 1.61        | 1.44        | 1.82        | 402.07        |          | 617.97  |
| 212.61    | 198.61       | 18.16        | -1.85       | -1.57       | -2.2        | -167.88 *     |          | 363.33  |
| 672.92    | 630.3        | 43.63        | -1.98       | -1.7        | -2.31       | -615.2 *      |          | 1172.01 |
| 72.28     | 64.73        | 8.73         | -1.93       | -1.43       | -2.63       | -60.38        |          | 110.89  |
| 1936.28   | 1878.61      | 61.66        | 1.62        | 1.45        | 1.83        | 719.08        |          | 1096.02 |
| 1305.09   | 1269.27      | 46.05        | 2.21        | 1.85        | 2.71        | 694.56 *      |          | 515.18  |
| 944.73    | 969.58       | 40.3         | 2.25        | 1.72        | 3.21        | 538.18 *      |          | 354.32  |
| 2342.74   | 2421.72      | 94.04        | 2.32        | 1.86        | 3.08        | 1380.06 *     |          | 893.02  |
| 4666.36   | 4906.83      | 278.64       | 1.68        | 1.46        | 1.93        | 1979.96       |          | 3101.86 |
| 1450.52   | 1466.99      | 44.41        | 1.4         | 1.31        | 1.48        | 415.65        |          | 1039.1  |
| 209.37    | 202.77       | 11.64        | -1.82       | -1.51       | -2.17       | -166.41 *     |          | 336.27  |
| 461.58    | 466.58       | 13.15        | -1.68       | -1.56       | -1.81       | -315.91 *     |          | 760.88  |
| 633.15    | 592.48       | 44.83        | -1.63       | -1.38       | -1.94       | -373.69       |          | 908.62  |
| 969.71    | 1060.36      | 97.78        | -1.37       | -1.18       | -1.63       | -392.16       |          | 1425.62 |
| 138.5     | 142.68       | 8.6          | -1.88       | -1.61       | -2.19       | -125.76 *     |          | 278.29  |
| 114.39    | 104.74       | 15.51        | 1.72        | 1.12        | 2.9         | 43.9          |          | 60.98   |

|         |         |       |       |       |       |            |         |
|---------|---------|-------|-------|-------|-------|------------|---------|
| 474.41  | 397.91  | 76.71 | -2.85 | -2.11 | -4.22 | -735.12 *  | 1055.37 |
| 177.54  | 181.04  | 7.3   | -1.65 | -1.46 | -1.85 | -117.93    | 308.02  |
| 46.89   | 37.73   | 9.43  | 1.81  | 1.01  | 2.96  | 16.91      | 19.4    |
| 1841.35 | 1800.65 | 49    | -1.76 | -1.66 | -1.87 | -1370.74 * | 3164.95 |
| 167.37  | 153.93  | 15.97 | -1.71 | -1.38 | -2.15 | -109.87    | 247.29  |
| 63.49   | 66.01   | 9.76  | -1.41 | -1.09 | -1.91 | -27.37     | 95.19   |
| 765.34  | 763.59  | 43.83 | 1.77  | 1.45  | 2.22  | 332.23     | 399.13  |
| 3148.74 | 3122.21 | 59.6  | -1.41 | -1.34 | -1.48 | -1266.01   | 4310.71 |
| 450.48  | 411.4   | 54.67 | -1.78 | -1.42 | -2.32 | -322.23    | 699.72  |
| 292.32  | 245.63  | 47.84 | -2.46 | -1.72 | -3.77 | -359.57 *  | 532.74  |
| 255.46  | 233.67  | 25.34 | -1.57 | -1.23 | -2.02 | -134.1     | 332.73  |
| 597.72  | 588.66  | 19.47 | 1.56  | 1.41  | 1.75  | 212.34     | 356.71  |
| 232.38  | 232     | 12.59 | -1.66 | -1.48 | -1.86 | -152.27    | 390.53  |
| 1418.56 | 1337.49 | 87.9  | -1.92 | -1.58 | -2.31 | -1233.55 * | 2334.47 |
| 519.88  | 515.23  | 12.46 | -1.58 | -1.4  | -1.77 | -300.14    | 868.27  |
| 576.21  | 536.2   | 46.4  | -1.43 | -1.25 | -1.68 | -231.76    | 774.64  |
| 131.96  | 129.03  | 23.16 | -1.9  | -1.4  | -2.77 | -116.18    | 257.65  |
| 229.26  | 230.37  | 21.4  | -2.31 | -1.84 | -2.9  | -302.62 *  | 579.41  |
| 451.93  | 400.67  | 53.96 | -1.95 | -1.57 | -2.54 | -381.32 *  | 747.12  |
| 874.14  | 859.25  | 25.3  | 1.58  | 1.48  | 1.68  | 314.9      | 543.79  |
| 278.99  | 323.27  | 46.49 | 1.34  | 1.01  | 1.69  | 82.45      | 240.37  |
| 135.89  | 138.41  | 9.44  | -1.98 | -1.74 | -2.28 | -136.21 *  | 270.58  |
| 30.79   | 17.25   | 13.56 | 4     | 0     | 27.36 | 12.94      | 6.31    |
| 193.77  | 187.34  | 8.72  | -1.39 | -1.27 | -1.52 | -72.46     | 262.44  |
| 951.51  | 945.67  | 31.73 | -1.56 | -1.46 | -1.66 | -525.33    | 1461.89 |
| 314.13  | 288.19  | 33.1  | -1.89 | -1.53 | -2.4  | -257.55 *  | 507.55  |
| 88.39   | 82.83   | 8.21  | -1.71 | -1.42 | -2.09 | -58.97     | 142.53  |
| 184.24  | 155.27  | 29.31 | -1.81 | -1.37 | -2.65 | -126.46    | 269.02  |
| 102.86  | 87.8    | 24.17 | -2.31 | -1.47 | -4.33 | -114.69    | 186.38  |
| 63.01   | 56.14   | 7.63  | 2.31  | 1.52  | 3.97  | 31.87 *    | 19.84   |
| 428.08  | 422.68  | 37.31 | -1.77 | -1.51 | -2.1  | -323.93 *  | 729.85  |
| 68.9    | 71.78   | 5.85  | -1.41 | -1.16 | -1.71 | -29.39     | 93.82   |
| 81.92   | 82.14   | 6.22  | -1.62 | -1.41 | -1.89 | -51.3      | 132.7   |
| 154.83  | 144.11  | 18.95 | -3.18 | -2.59 | -4.08 | -314.4 *   | 467.71  |
| 162.45  | 152.05  | 12.42 | -3.25 | -2.83 | -3.78 | -341.55 *  | 499.56  |
| 262.91  | 247.49  | 20.76 | -1.97 | -1.67 | -2.34 | -239.86 *  | 459.94  |

|         |         |        |       |       |            |            |         |
|---------|---------|--------|-------|-------|------------|------------|---------|
| 37.18   | 22.35   | 14.94  | -5.35 | -2.38 | -100000000 | -97.13 *   | 103.77  |
| 1472.8  | 1344.39 | 157.93 | -2.01 | -1.5  | -2.68      | -1361.44 * | 2394.11 |
| 158.17  | 156.97  | 10.22  | -1.84 | -1.63 | -2.09      | -131.56 *  | 290.14  |
| 322.18  | 325.96  | 15.82  | 1.73  | 1.54  | 1.93       | 137.14 *   | 186.67  |
| 121.77  | 117.5   | 9.39   | -1.83 | -1.52 | -2.21      | -97.99 *   | 202.93  |
| 4987.34 | 5134.08 | 165.26 | -1.32 | -1.24 | -1.41      | -1628.87   | 6884.42 |
| 4642.09 | 4805.33 | 194.21 | -1.21 | -1.11 | -1.32      | -1011.4    | 5981.73 |
| 41.23   | 47.16   | 7.4    | 1.64  | 1.07  | 2.66       | 18.33      | 33.17   |
| 40.2    | 37.97   | 5.2    | 2.67  | 1.54  | 7.08       | 23.74 *    | 9.31    |
| 350.07  | 304.46  | 46.09  | -2.05 | -1.61 | -2.77      | -320.75 *  | 588.56  |
| 127.99  | 128.04  | 4.34   | -1.3  | -1.11 | -1.49      | -37.87     | 155.2   |
| 1880.56 | 2112.04 | 237.1  | -1.41 | -1.15 | -1.78      | -873.32    | 3172.31 |
| 145.18  | 135.69  | 13.42  | -1.36 | -1.13 | -1.67      | -49.08     | 177.03  |
| 290.55  | 265.42  | 27.4   | -1.57 | -1.33 | -1.9       | -150.56    | 407.66  |
| 147.64  | 119.8   | 30.63  | -4.72 | -3.13 | -8.33      | -445.24 *  | 500.5   |
| 15.49   | 14.7    | 2.67   | -3.13 | -2.25 | -4.62      | -31.31 *   | 43.27   |
| 743.25  | 665.83  | 78.81  | -1.59 | -1.32 | -1.98      | -389.94    | 1040.51 |
| 76.38   | 86.49   | 11.91  | 1.38  | 1.03  | 1.8        | 23.79      | 62.88   |
| 1107.44 | 1050.17 | 69.48  | -1.53 | -1.34 | -1.75      | -553.71    | 1536.86 |
| 24.83   | 20.5    | 5.16   | -2    | -1.29 | -3.54      | -20.53     | 45.68   |
| 52.79   | 54.1    | 5.3    | -2.3  | -1.85 | -2.87      | -70.24 *   | 131.39  |
| 153.56  | 159.27  | 9.87   | -1.55 | -1.37 | -1.76      | -87.7      | 251.97  |
| 72.08   | 76.56   | 9.95   | -2    | -1.53 | -2.67      | -76.78 *   | 164.26  |
| 81.18   | 78.66   | 11.3   | -2.15 | -1.55 | -3.01      | -90.65 *   | 148.94  |
| 182.31  | 164.78  | 19.54  | -2.46 | -2    | -3.11      | -239.91 *  | 384.66  |
| 175.74  | 164.06  | 12.88  | -1.65 | -1.4  | -1.96      | -106.9     | 269.2   |
| 34.59   | 28.97   | 8.56   | 1.58  | 0.74  | 3.27       | 10.67      | 21.17   |
| 86.93   | 84.79   | 7.64   | 1.61  | 1.11  | 2.72       | 32.1       | 42.13   |
| 20.92   | 16.58   | 5.52   | -1.88 | -1.13 | -4.25      | -14.64     | 32.46   |
| 443.51  | 413.49  | 32.46  | -1.55 | -1.33 | -1.81      | -225.81    | 612.56  |
| 23.24   | 23.93   | 3.1    | 1.17  | 0.88  | 1.54       | 3.56       | 19.7    |
| 87.62   | 78.02   | 10.5   | 1.76  | 1.25  | 2.52       | 33.58      | 42.24   |
| 22.86   | 24.23   | 3.92   | 2.12  | 1.13  | 8.05       | 12.83      | 12.16   |
| 27.15   | 21.37   | 6.8    | -2.09 | -1.31 | -4.45      | -23.28     | 43.21   |
| 79.26   | 67.84   | 12.12  | -1.61 | -1.22 | -2.3       | -41.4      | 109.9   |
| 92.99   | 111.39  | 21.03  | -2.63 | -1.82 | -4.01      | -182.08 *  | 331.58  |

|         |         |        |       |       |           |           |         |
|---------|---------|--------|-------|-------|-----------|-----------|---------|
| 593.19  | 579.59  | 25.75  | 1.55  | 1.34  | 1.8       | 204.53    | 347.51  |
| 271.66  | 302.14  | 32.28  | -1.55 | -1.24 | -1.96     | -166.47   | 502.03  |
| 754.98  | 718.55  | 42.97  | -1.54 | -1.37 | -1.74     | -388.25   | 1119.74 |
| 2553.89 | 2720.57 | 184.49 | 1.8   | 1.59  | 2.02      | 1210 *    | 1488.83 |
| 1442.93 | 1395.59 | 62.63  | -1.5  | -1.39 | -1.63     | -697.64   | 2096.77 |
| 635.05  | 632.02  | 14.5   | 1.74  | 1.64  | 1.85      | 268.86 *  | 362.71  |
| 698.18  | 736.96  | 48.41  | 1.34  | 1.18  | 1.53      | 188.95    | 538.49  |
| 947.59  | 973.03  | 38.34  | -1.49 | -1.38 | -1.62     | -480.5    | 1436.61 |
| 116.25  | 112.78  | 10.8   | -1.48 | -1.21 | -1.83     | -54.27    | 158.45  |
| 602.94  | 668.32  | 68.39  | 1.74  | 1.33  | 2.32      | 284.65    | 429.03  |
| 745.3   | 687.04  | 59.71  | -1.38 | -1.2  | -1.62     | -264      | 939.65  |
| 357.87  | 323.59  | 38.84  | -1.62 | -1.33 | -2.04     | -199.94   | 502.91  |
| 183.06  | 165.94  | 22.12  | 1.51  | 1.12  | 2         | 56.15     | 109.97  |
| 1107.46 | 1146.75 | 54.52  | -1.36 | -1.2  | -1.54     | -418.46   | 1646.77 |
| 106.13  | 106.75  | 7      | -2.3  | -2.01 | -2.65     | -138.74 * | 240.19  |
| 259.76  | 250.49  | 13.33  | -2    | -1.82 | -2.22     | -250.89 * | 492.39  |
| 148.06  | 125.65  | 23.69  | -1.9  | -1.31 | -2.9      | -113.5    | 207.33  |
| 237.19  | 222.31  | 18.66  | -2.63 | -2.3  | -3.07     | -362.53 * | 589.19  |
| 91.23   | 102.71  | 22.22  | -1.13 | -0.79 | -1.81     | -13.85    | 109.85  |
| 68.4    | 53.35   | 15.39  | -7.13 | -4.75 | -13.66    | -327.12 * | 403.28  |
| 229.03  | 251.37  | 28.03  | -1.68 | -1.38 | -2.09     | -170.66   | 442.54  |
| 1825.43 | 1426.27 | 409.49 | -2.35 | -1.45 | -4.6      | -1926.07  | 2911.29 |
| 19.19   | 16.81   | 2.95   | -1.88 | -1.3  | -2.8      | -14.84    | 28.22   |
| 35.36   | 42.96   | 8.44   | -2.1  | -1.54 | -3.15     | -47.24 *  | 95.34   |
| 312.68  | 326.25  | 17.86  | 1.54  | 1.34  | 1.79      | 114.99    | 203.92  |
| 67.23   | 69.45   | 5.78   | 1.18  | 0.94  | 1.51      | 10.7      | 63.16   |
| 147.33  | 131.63  | 16.52  | -1.34 | -1.1  | -1.69     | -44.41    | 178.08  |
| 24.96   | 24.25   | 3.81   | -2.1  | -1.61 | -2.9      | -26.73 *  | 50.17   |
| 55.77   | 62.51   | 11.95  | -1.85 | -1.39 | -2.7      | -52.82    | 114.17  |
| 29.5    | 24      | 6.46   | 8.86  | 2.32  | 100000000 | 21.29 *   | 2.83    |
| 62.82   | 65.76   | 9.41   | -1.91 | -1.51 | -2.54     | -59.83 *  | 127.34  |
| 508.16  | 516.44  | 15.25  | 1.74  | 1.6   | 1.9       | 219.77 *  | 290.16  |
| 27.63   | 26.26   | 4.37   | 2.81  | 1.45  | 12.66     | 16.91     | 12.8    |
| 531.1   | 548.03  | 26.04  | 1.56  | 1.43  | 1.7       | 196.9     | 350.31  |
| 2203.78 | 2319.8  | 126.39 | 1.41  | 1.22  | 1.64      | 679.54    | 1533.24 |
| 26.74   | 20.33   | 6.82   | -2.01 | -1.22 | -4.55     | -20.49    | 43.3    |



|         |         |        |       |       |            |           |         |
|---------|---------|--------|-------|-------|------------|-----------|---------|
| 1342.81 | 1328.03 | 30.97  | -1.74 | -1.6  | -1.9       | -989.32 * | 2205.41 |
| 1503.4  | 1354.69 | 149.43 | -1.63 | -1.37 | -2         | -855.71   | 2213.18 |
| 1133.55 | 1183.8  | 60.76  | -1.3  | -1.12 | -1.5       | -357.4    | 1640.81 |
| 2323.6  | 2468.52 | 211.1  | -1.54 | -1.32 | -1.82      | -1333.68  | 3764.94 |
| 176.68  | 192.94  | 19.03  | -1.5  | -1.23 | -1.85      | -96.29    | 308.89  |
| 432.54  | 491.84  | 61.45  | 1.63  | 1.27  | 2          | 189.22    | 307.58  |
| 613.54  | 619.94  | 22.11  | 1.51  | 1.37  | 1.67       | 208.92    | 395.92  |
| 886.13  | 973.6   | 99.63  | 2.58  | 1.89  | 3.74       | 596.27 *  | 439.95  |
| 1211.75 | 1206.65 | 28.36  | 1.63  | 1.51  | 1.77       | 466.04 *  | 719.93  |
| 181.35  | 169.33  | 15.37  | -2.07 | -1.68 | -2.55      | -180.55 * | 325.94  |
| 1889.38 | 1977.37 | 106.17 | 1.92  | 1.63  | 2.29       | 945.33 *  | 1119.15 |
| 164.15  | 165.57  | 10.04  | -1.62 | -1.34 | -1.94      | -103.36   | 245.12  |
| 531.57  | 485.93  | 48.12  | -1.32 | -1.13 | -1.58      | -153.78   | 630.82  |
| 462.96  | 461.31  | 12.16  | -1.39 | -1.29 | -1.49      | -177.87   | 654.54  |
| 401.89  | 432.66  | 37.85  | 1.77  | 1.48  | 2.07       | 187.59    | 252.98  |
| 465.97  | 460.86  | 14.25  | -1.6  | -1.49 | -1.71      | -276.09   | 718.61  |
| 678.13  | 716.35  | 41.81  | 1.58  | 1.41  | 1.76       | 263.22    | 440.44  |
| 216.27  | 205.85  | 13.07  | -2.07 | -1.7  | -2.5       | -221.15 * | 385.43  |
| 36.31   | 38.43   | 4.76   | -3.3  | -2.6  | -4.27      | -88.27 *  | 129.47  |
| 171.99  | 164.53  | 7.89   | -3.47 | -3.12 | -3.85      | -405.72 * | 587.39  |
| 231.77  | 227.89  | 15.69  | -1.41 | -1.23 | -1.62      | -92.87    | 318.74  |
| 67.63   | 44.64   | 23.22  | -5.32 | -2.79 | -36.92     | -192.63 * | 215.9   |
| 202.05  | 203.83  | 10.05  | -1.24 | -1.1  | -1.4       | -49.84    | 261.62  |
| 61.39   | 55.76   | 6.53   | 1.53  | 1.19  | 1.92       | 19.32     | 37.53   |
| 34.55   | 37.25   | 3.94   | -1.73 | -1.44 | -2.13      | -27.21    | 64.72   |
| 3.35    | 3.49    | 4.06   | -7.19 | -2.39 | -100000000 | -21.62 *  | 24.02   |
| 44.95   | 41.78   | 7.8    | -1.94 | -1.4  | -2.88      | -39.28    | 74.49   |
| 238.2   | 258.09  | 21.29  | 1.74  | 1.42  | 2.14       | 109.9     | 136.46  |
| 299.87  | 246.64  | 54.37  | -2.16 | -1.47 | -3.49      | -284.97   | 471.92  |
| 40.76   | 31.05   | 10.19  | 1.56  | 0.61  | 5.8        | 11.2      | 15.23   |
| 480.11  | 454.77  | 28.53  | 1.99  | 1.42  | 3.24       | 226.72    | 177.61  |
| 60.42   | 38.77   | 21.71  | 1.28  | 0.1   | 2.55       | 8.55      | 29.02   |
| 73.6    | 77.73   | 6.21   | 1.52  | 1.24  | 1.86       | 26.43     | 49.92   |
| 23.93   | 24.6    | 3.34   | -1.06 | -0.76 | -1.48      | -1.58     | 29.35   |
| 26.93   | 23      | 5.32   | 1.87  | 0.9   | 7.1        | 10.71     | 7.67    |
| 1895.6  | 1857.6  | 51.45  | 1.61  | 1.44  | 1.8        | 700.83    | 1096.36 |

|         |         |        |       |       |       |           |         |
|---------|---------|--------|-------|-------|-------|-----------|---------|
| 24.58   | 24.76   | 3.46   | -1.64 | -1.24 | -2.23 | -15.89    | 44.29   |
| 399.11  | 389.46  | 18.66  | -1.73 | -1.52 | -1.97 | -286.12 * | 635.3   |
| 74.73   | 70.09   | 8.92   | 1.7   | 1.28  | 2.22  | 28.85     | 42.11   |
| 68      | 65.66   | 6.34   | -1.85 | -1.51 | -2.29 | -55.7 *   | 129.31  |
| 172.48  | 145.49  | 27.64  | -1.67 | -1.26 | -2.43 | -96.83    | 239.89  |
| 31.11   | 43.19   | 12.5   | 3.12  | 1.49  | 6.46  | 29.37     | 12.04   |
| 611.31  | 630.73  | 24.55  | -1.41 | -1.31 | -1.52 | -260.15   | 899.8   |
| 2448.13 | 2686.19 | 245.29 | -1.34 | -1.12 | -1.62 | -907.43   | 3803.97 |
| 83.53   | 85.24   | 8.63   | -1.63 | -1.31 | -2.04 | -53.45    | 145.57  |
| 177.3   | 147.27  | 31.06  | -1.67 | -1.22 | -2.57 | -98.54    | 250.01  |
| 364.15  | 374.93  | 23.46  | -1.54 | -1.35 | -1.76 | -201.69   | 556.64  |
| 325.29  | 298.92  | 28.72  | -1.67 | -1.43 | -2    | -200.8    | 496.71  |
| 119.89  | 104.42  | 19.37  | 2.12  | 1.36  | 3.28  | 55.2      | 47.76   |
| 46.73   | 44.9    | 8.35   | -1.91 | -1.37 | -2.84 | -40.79    | 83.68   |
| 928.08  | 891.04  | 36.97  | 1.49  | 1.37  | 1.62  | 294.42    | 592.13  |
| 257.89  | 232.03  | 28.96  | -1.77 | -1.43 | -2.26 | -178.6    | 389.18  |
| 476.47  | 466.61  | 15.85  | -1.46 | -1.3  | -1.64 | -216.03   | 719.38  |
| 222.56  | 214.99  | 9.33   | -1.53 | -1.31 | -1.78 | -114.97   | 302.84  |
| 66.24   | 64.82   | 5.1    | -1.85 | -1.56 | -2.2  | -54.96 *  | 121.49  |
| 42.9    | 41.45   | 5.01   | -1.85 | -1.4  | -2.45 | -35.09    | 83.89   |
| 185.82  | 170.46  | 19.09  | -1.89 | -1.42 | -2.48 | -151.07   | 283.23  |
| 47.73   | 46.9    | 6.76   | -1.72 | -1.32 | -2.33 | -33.98    | 76.32   |
| 1963.7  | 1956.41 | 34.18  | 1.42  | 1.34  | 1.51  | 580.42    | 1338.51 |
| 442.38  | 431.59  | 18.22  | -1.4  | -1.29 | -1.53 | -173.77   | 612.19  |
| 175.62  | 165.17  | 13.84  | -1.43 | -1.2  | -1.72 | -70.94    | 246.56  |
| 932.35  | 846.08  | 87.02  | -1.65 | -1.39 | -2.01 | -551.56   | 1342.21 |
| 269.21  | 262.4   | 14.91  | -1.85 | -1.66 | -2.08 | -223.03 * | 484.45  |
| 480.14  | 474.52  | 10.25  | -1.28 | -1.21 | -1.36 | -134.48   | 613.85  |
| 125.1   | 109.49  | 16.42  | 2.08  | 1.32  | 3.75  | 56.81     | 40.16   |
| 153.7   | 162.63  | 14.07  | -1.58 | -1.36 | -1.87 | -94.56    | 255.33  |
| 15.62   | 15.7    | 3.9    | -2.24 | -1.35 | -4.02 | -19.4     | 40.17   |
| 237.61  | 239.18  | 12.12  | 1.45  | 1.28  | 1.64  | 73.79     | 168.84  |
| 199.4   | 185.86  | 17.56  | -1.51 | -1.26 | -1.84 | -95.3     | 268.94  |
| 89.25   | 109.45  | 21.56  | -1.48 | -1.05 | -2.27 | -52.78    | 176.36  |
| 184.71  | 176.61  | 15.44  | -2.35 | -2.02 | -2.77 | -238.47 * | 409.36  |
| 237.08  | 239.7   | 11.09  | 1.41  | 1.25  | 1.61  | 70.05     | 164.28  |

|        |         |        |       |       |            |           |         |
|--------|---------|--------|-------|-------|------------|-----------|---------|
| 77.94  | 69.01   | 10.51  | -2.4  | -1.8  | -3.31      | -96.32 *  | 150.95  |
| 38.12  | 42.31   | 7.33   | -2.15 | -1.58 | -3.11      | -48.8 *   | 97.97   |
| 77.68  | 67.5    | 13.14  | -2.02 | -1.38 | -3.12      | -69.04    | 118.41  |
| 105.31 | 82.97   | 23.56  | -1.8  | -1.15 | -3.46      | -66.61    | 134.17  |
| 38.03  | 32.63   | 6.58   | -2.07 | -1.38 | -3.26      | -34.82    | 60.99   |
| 73.72  | 62.22   | 13.7   | 2.09  | 1.29  | 3.1        | 32.52     | 27.39   |
| 155.68 | 133.63  | 22.41  | -2.87 | -2.18 | -4.04      | -250.29 * | 361.08  |
| 187.6  | 174.95  | 14.32  | -1.46 | -1.11 | -1.87      | -80.88    | 289.11  |
| 310.75 | 336.32  | 32.88  | 2.38  | 1.94  | 2.87       | 194.93 *  | 143.77  |
| 94.83  | 101.58  | 7.59   | 1.79  | 1.47  | 2.2        | 44.77     | 59.94   |
| 142.05 | 134.39  | 10.06  | 2.04  | 1.7   | 2.47       | 68.57 *   | 66      |
| 132.26 | 103.38  | 30.28  | -2.34 | -1.47 | -4.64      | -139.01   | 211.16  |
| 564.43 | 590.54  | 28.24  | 1.57  | 1.38  | 1.79       | 214.83    | 393.86  |
| 99.23  | 94.4    | 7.48   | -1.66 | -1.4  | -1.98      | -62.52    | 164.4   |
| 58.51  | 62.45   | 6.26   | -1.53 | -1.28 | -1.86      | -33.05    | 95.07   |
| 72.14  | 68.6    | 8.64   | -1.68 | -1.29 | -2.21      | -46.32    | 104.77  |
| 86.04  | 122.01  | 37.45  | -1.41 | -0.91 | -2.87      | -49.81    | 176.64  |
| 103.66 | 106.46  | 6.99   | -1.43 | -1.24 | -1.66      | -46.02    | 156.66  |
| 413.53 | 395.01  | 27.93  | -1.74 | -1.53 | -2         | -292.68 * | 682.49  |
| 43.87  | 45.8    | 3.01   | -1.92 | -1.59 | -2.29      | -41.93 *  | 80.62   |
| 143.85 | 148.22  | 8.71   | -1.6  | -1.44 | -1.8       | -89.5     | 235.72  |
| 30.32  | 25.86   | 5.76   | -2.49 | -1.75 | -4         | -38.46 *  | 64.68   |
| 104.47 | 100.19  | 8.59   | -1.37 | -1.16 | -1.64      | -37.38    | 141.66  |
| 180.17 | 172.34  | 9.61   | -1.46 | -1.3  | -1.65      | -80.03    | 262.05  |
| 48.97  | 26.45   | 22.77  | -1.43 | -0.57 | -100000000 | -11.41    | 35.09   |
| 908.37 | 864.88  | 48     | 1.02  | 0.89  | 1.16       | 15.03     | 804.33  |
| 55.67  | 40.75   | 15.19  | -1.46 | -0.77 | -3.9       | -18.65    | 46.82   |
| 19.47  | 18.81   | 3.57   | -1.61 | -1.13 | -2.45      | -11.57    | 28.18   |
| 323.17 | 347.86  | 25.85  | -1.38 | -1.19 | -1.62      | -132.22   | 502.39  |
| 104.85 | 76.3    | 29.11  | -2.7  | -1.31 | -7.59      | -129.55   | 155.26  |
| 157.18 | 124.96  | 33.81  | -2.47 | -1.57 | -4.58      | -183.18 * | 266.25  |
| 554.51 | 554.66  | 31.55  | -1.06 | -0.95 | -1.19      | -32.42    | 587.97  |
| 39.15  | 33.83   | 10.96  | -1.62 | -0.9  | -3.62      | -20.97    | 48.92   |
| 1732.4 | 1863.01 | 137.27 | 1.16  | 1.01  | 1.31       | 255.82    | 1596.96 |
| 665.16 | 680.53  | 22.73  | -1    | -0.94 | -1.07      | -1.91     | 691.44  |
| 13.98  | 10.47   | 5.36   | 1.18  | 0.18  | 2.8        | 1.57      | 8.85    |

|          |         |        |       |       |           |         |          |
|----------|---------|--------|-------|-------|-----------|---------|----------|
| 395.34   | 355.07  | 42.46  | -1.18 | -0.98 | -1.48     | -63.79  | 424.6    |
| 29.24    | 36.65   | 8.7    | -1.48 | -1    | -2.49     | -17.54  | 55.52    |
| 14.06    | 23.34   | 9.77   | -1.14 | -0.64 | -3.69     | -3.27   | 25.61    |
| 13.3     | 13.49   | 6.06   | -1.01 | 0     | -4.57     | -0.14   | 8.18     |
| 8.57     | 8.46    | 3.15   | -1.03 | -0.14 | -3.16     | -0.26   | 6.51     |
| 22.39    | 20.32   | 6.89   | 1.17  | 0.46  | 3.29      | 2.89    | 12.77    |
| 1550.15  | 1635.45 | 93.74  | 1.4   | 1.24  | 1.56      | 464.84  | 1201.63  |
| 2343.56  | 2438.92 | 102.44 | 1.11  | 1.01  | 1.22      | 245.49  | 2111.78  |
| 1416.44  | 1510.79 | 98.32  | 1.26  | 1.02  | 1.59      | 311.06  | 1063.57  |
| 22.53    | 16.14   | 6.7    | -1.74 | -0.8  | -5.72     | -12     | 35.3     |
| 52.8     | 33.51   | 20.08  | 1.13  | 0.02  | 2.8       | 3.83    | 27.75    |
| 32.94    | 39.41   | 9.53   | -1.02 | -0.64 | -1.78     | -0.62   | 37.06    |
| 266.42   | 238.37  | 29.47  | -1.51 | -1.25 | -1.9      | -121.45 | 357.91   |
| 18.49    | 14.21   | 6.97   | -1.26 | -0.48 | -6.77     | -3.75   | 22.23    |
| 21.75    | 23.01   | 3.2    | 1     | 0.58  | 2.55      | 0       | 14.42    |
| 12404.65 | 12470.1 | 238.27 | 1.01  | 0.96  | 1.06      | 110.9   | 12111.43 |
| 720.2    | 688.9   | 37.03  | -1.16 | -1.01 | -1.32     | -107.25 | 754.58   |
| 30.93    | 23.66   | 8.97   | -1.06 | -0.55 | -2.91     | -1.38   | 28.01    |
| 158.43   | 127.51  | 31.3   | -1.73 | -0.96 | -3.17     | -93.13  | 171.18   |
| 33.29    | 21.33   | 12.74  | 4.86  | 0.08  | 100000000 | 16.94   | 4.63     |
| 15.26    | 15.49   | 3.68   | -1.09 | -0.43 | -2.15     | -1.44   | 15.04    |
| 57.35    | 63.03   | 8.62   | 1.27  | 0.92  | 1.75      | 13.21   | 54.78    |
| 819.99   | 869.2   | 56.13  | 2.01  | 1.76  | 2.28      | 436 *   | 435.18   |
| 33.95    | 39.85   | 6.38   | 1.65  | 0.69  | 100000000 | 15.7    | 42.16    |
| 671.64   | 651.11  | 24.75  | -1    | -0.93 | -1.08     | -1.65   | 650.06   |
| 4207.4   | 4300.09 | 136.71 | -1.07 | -0.95 | -1.2      | -304.86 | 4883.46  |
| 5060.98  | 5469.26 | 431.51 | -1.02 | -0.89 | -1.19     | -109.71 | 5752.72  |
| 245.46   | 243.62  | 10.8   | -1.13 | -1.01 | -1.25     | -30.55  | 281.5    |
| 99.11    | 76.29   | 31.84  | -2.65 | -1.35 | -8.68     | -126    | 165.16   |
| 55.11    | 50.39   | 7.97   | -2.11 | -1.32 | -3.21     | -55.95  | 86.17    |
| 385.9    | 436.98  | 59.09  | 1.26  | 0.92  | 1.73      | 89.88   | 313.71   |
| 5.52     | 4.32    | 5.19   | 1.01  | 0     | 100000000 | 0.04    | 3.07     |
| 46.71    | 58.89   | 13.21  | -1.07 | -0.75 | -1.71     | -3.86   | 60.54    |
| 220.48   | 188.02  | 32.75  | -1.31 | -0.96 | -1.9      | -58.69  | 223.39   |
| 79.56    | 80.2    | 8.11   | -1.32 | -0.98 | -1.73     | -25.54  | 118.65   |
| 39.95    | 57.88   | 18.68  | 1.06  | 0.48  | 1.83      | 3.36    | 45.41    |

|         |         |        |       |       |           |            |         |
|---------|---------|--------|-------|-------|-----------|------------|---------|
| 42.77   | 40.9    | 5.75   | -1.16 | -0.82 | -1.62     | -6.43      | 44.53   |
| 619.89  | 646.85  | 33.73  | 1.34  | 1.07  | 1.76      | 164.49     | 418.58  |
| 4.03    | 3.85    | 1.48   | 1.36  | 0.44  | 5.2       | 1.02       | 3.07    |
| 5906.75 | 5840.29 | 72.39  | -1.26 | -1.22 | -1.3      | -1518.14   | 7428.98 |
| 25.48   | 19.02   | 7.36   | 1.28  | 0.35  | 100000000 | 4.11       | 25.74   |
| 5654.1  | 5790.27 | 174.51 | -1.19 | -1.12 | -1.26     | -1088.42   | 6990.16 |
| 12.37   | 17.88   | 6.45   | -1.17 | -0.62 | -3        | -3.12      | 21.68   |
| 86.5    | 90.55   | 6.25   | -1.22 | -1.01 | -1.46     | -19.62     | 111.92  |
| 9.93    | 11.48   | 2.35   | -1.81 | -1.22 | -2.86     | -9.27      | 22.48   |
| 41.18   | 48.91   | 10.39  | -2.02 | -1.45 | -3.16     | -49.9      | 92.22   |
| 40.63   | 32.68   | 8.77   | -1.34 | -0.87 | -2.46     | -11.23     | 44.79   |
| 14.56   | 14.34   | 6.99   | 1.07  | 0.19  | 100000000 | 0.89       | 13.92   |
| 4.28    | 9.06    | 5.3    | -1.22 | -0.55 | -31.79    | -2.02      | 10.75   |
| 252.91  | 297.15  | 47.4   | -5.21 | -3.38 | -7.8      | -1249.79 * | 1831.05 |
| 6.59    | 8.58    | 7.69   | 1.27  | 0     | 100000000 | 1.84       | 4.98    |
| 474.97  | 563.23  | 91.5   | 2.35  | 1.61  | 3.39      | 323.43 *   | 272.6   |
| 2033.49 | 1965.97 | 78.72  | 1.03  | 0.93  | 1.14      | 49.44      | 1928.43 |
| 33.64   | 27.23   | 7.26   | -2.31 | -1.52 | -4.21     | -35.79 *   | 56.95   |
| 175.94  | 199.56  | 24.84  | 2.17  | 1.68  | 2.72      | 107.61 *   | 92.53   |
| 76.91   | 57.19   | 20.76  | -2.81 | -1.6  | -7.13     | -103.52 *  | 135.3   |
| 526.79  | 522.91  | 32.64  | 1.98  | 1.51  | 2.8       | 259.34 *   | 301.06  |
| 515.51  | 500.39  | 18.27  | -1.2  | -0.95 | -1.46     | -102.51    | 527.68  |
| 45.22   | 28.4    | 16.85  | -1.41 | -0.68 | -58.46    | -11.52     | 38.72   |
| 46.91   | 39.98   | 7.72   | -1.15 | -0.83 | -1.73     | -6.13      | 48.29   |
| 107.89  | 83.51   | 27.47  | -4.04 | -2.21 | -9.23     | -254.22 *  | 269.23  |
| 465.81  | 508.03  | 47.05  | 1.3   | 1.1   | 1.51      | 117.7      | 395.07  |
| 91.77   | 88.01   | 7.71   | -1.85 | -1.59 | -2.19     | -74.83 *   | 164.18  |
| 21.45   | 22.24   | 2.41   | -2.22 | -1.61 | -2.96     | -27.05 *   | 42.85   |
| 52.84   | 50.74   | 4.52   | -2.01 | -1.55 | -2.57     | -51.42 *   | 90      |
| 39.72   | 31.33   | 9.04   | 3.46  | 1.69  | 6.4       | 22.27 *    | 9.15    |
| 31.13   | 39.33   | 8.91   | -1.04 | -0.67 | -1.74     | -1.48      | 44.81   |
| 40.15   | 39.11   | 9.05   | -1.23 | -0.54 | -2.32     | -8.81      | 34.88   |
| 33.95   | 21.42   | 12.95  | 1.62  | 0.01  | 8.31      | 8.19       | 7.71    |
| 188.14  | 192.37  | 11.07  | -2.25 | -1.7  | -2.84     | -240.93 *  | 373.02  |
| 39.95   | 36.69   | 6.19   | -2.1  | -1.51 | -3.04     | -40.29 *   | 74.32   |
| 14.78   | 21.13   | 8.9    | -1.13 | -0.46 | -3.89     | -2.74      | 24.64   |

|        |        |       |       |       |            |           |        |
|--------|--------|-------|-------|-------|------------|-----------|--------|
| 16.86  | 12.18  | 4.98  | -2.87 | -1.57 | -8.89      | -22.75 *  | 40.03  |
| 107.73 | 87.08  | 24.48 | -2.48 | -1.52 | -4.79      | -129.03 * | 192.23 |
| 4.23   | 4.17   | 3.41  | -7.47 | -2.12 | -100000000 | -26.97 *  | 41.77  |
| 27.61  | 24.2   | 6.74  | -2.62 | -1.51 | -5.11      | -39.1 *   | 53.16  |
| 5.6    | 10.33  | 5.93  | -3.37 | -1.51 | -60.53     | -24.51 *  | 30.53  |
| 14.34  | 11.98  | 4.29  | -3.79 | -2.23 | -9.39      | -33.45 *  | 41.57  |
| 28.44  | 19.49  | 9.28  | -1.04 | -0.56 | -4.83      | -0.77     | 18.83  |
| 25.8   | 31.55  | 6.73  | -1.05 | -0.67 | -1.73      | -1.65     | 36.04  |
| 13.21  | 10.28  | 3.43  | -2.97 | -1.77 | -6.73      | -20.27 *  | 29.48  |
| 52.32  | 42.11  | 11.74 | -2.64 | -1.79 | -4.91      | -69.24 *  | 112.97 |
| 142.67 | 145.36 | 11.24 | -1.89 | -1.51 | -2.34      | -129.55 * | 247.88 |
| 66.59  | 49.73  | 17.09 | -1.69 | -0.99 | -3.96      | -34.08    | 72.85  |
| 121.74 | 117.66 | 5.98  | -1.05 | -0.79 | -1.32      | -6.13     | 140.72 |
| 10.57  | 11.17  | 2.44  | 1.39  | 0.56  | 100000000  | 3.15      | 2.35   |
| 23.81  | 30.73  | 8.54  | 1.01  | 0.46  | 2.96       | 0.38      | 41.31  |
| 108.72 | 98.62  | 12.24 | -2.18 | -1.58 | -2.97      | -116.64 * | 186.41 |
| 53.76  | 54.42  | 5.59  | -1.45 | -1.18 | -1.8       | -24.32    | 78.75  |
| 42     | 46.52  | 5.28  | 5.1   | 3.2   | 10.67      | 37.4 *    | 10.23  |
| 117.49 | 132.99 | 20.99 | 4.28  | 2.83  | 6.79       | 101.92 *  | 33.31  |
| 42.9   | 36.7   | 6.93  | 3.48  | 1.88  | 9.6        | 26.16 *   | 10.17  |
| 148.24 | 209.99 | 65.45 | -1.23 | -0.72 | -2.63      | -49.11    | 302.53 |
| 47.48  | 46.22  | 3.51  | -1.38 | -1.09 | -1.71      | -17.67    | 69.28  |
| 19.37  | 15.41  | 4.54  | -3.02 | -1.95 | -5.95      | -31.19 *  | 50.52  |
| 28.04  | 24.92  | 4.09  | 1.7   | 1.01  | 3.53       | 10.22     | 10.88  |
| 17.44  | 16.4   | 3     | -2.72 | -1.71 | -4.26      | -28.13 *  | 36.58  |
| 12.75  | 10.54  | 2.64  | -3.12 | -1.71 | -5.79      | -22.31 *  | 39.65  |
| 26.6   | 35.15  | 8.86  | 9.63  | 3.35  | 100000000  | 31.5 *    | 6.02   |
| 23.82  | 23.14  | 4.21  | 1.26  | 0.72  | 2.85       | 4.82      | 22.26  |
| 17.61  | 24.99  | 9.37  | 6.81  | 1.74  | 100000000  | 21.31 *   | 5.99   |
| 19.73  | 16.15  | 4.33  | 2.14  | 0.94  | 9.7        | 8.6       | 6.58   |
| 13.97  | 24.5   | 10.69 | 11.91 | 2.25  | 100000000  | 22.44 *   | 1      |
| 25.49  | 25.37  | 3.72  | 6.16  | 2.54  | 100000000  | 21.26 *   | 2.19   |
| 77.15  | 80.44  | 6.15  | 2.73  | 1.97  | 4.25       | 51.02 *   | 30.01  |
| 259.35 | 247.76 | 14.55 | -1.8  | -1.52 | -2.1       | -197.31 * | 412.32 |
| 33.49  | 17.63  | 15.92 | 5.67  | 0     | 100000000  | 14.53     | 3      |
| 21.19  | 22.53  | 3.58  | -2.13 | -1.5  | -3.08      | -25.57 *  | 46.45  |

|         |         |        |       |       |            |           |         |
|---------|---------|--------|-------|-------|------------|-----------|---------|
| 3812.66 | 4124.77 | 319.37 | 1.41  | 1.21  | 1.63       | 1194.45   | 2793.55 |
| 57.46   | 53.98   | 6.14   | 1.07  | 0.83  | 1.37       | 3.66      | 47.45   |
| 22.66   | 23.31   | 3.59   | -2.95 | -1.5  | -4.8       | -45.4 *   | 48.58   |
| 6.24    | 9.19    | 3.78   | 1.3   | 0.38  | 5.42       | 2.14      | 9.66    |
| 25.39   | 26.6    | 12.07  | -3.68 | -2.05 | -14.57     | -71.17 *  | 96.26   |
| 33.85   | 41.44   | 10.75  | -1.38 | -0.88 | -2.5       | -15.8     | 49.71   |
| 174.16  | 168.51  | 12.54  | 1.55  | 1.14  | 2.33       | 59.9      | 112.47  |
| 20.89   | 26.63   | 6.84   | -1.4  | -0.92 | -2.5       | -10.78    | 34.39   |
| 4.16    | 8.21    | 4.36   | 1.32  | 0.16  | 3.36       | 2         | 5.82    |
| 56.87   | 53.9    | 4.29   | -1.15 | -0.62 | -1.72      | -8.19     | 78.72   |
| 12.65   | 17.94   | 8.63   | 1.2   | 0.24  | 2.78       | 2.99      | 15.78   |
| 25.8    | 28.92   | 3.53   | 3.41  | 2     | 8.99       | 20.43 *   | 7.08    |
| 7.1     | 5.67    | 3.07   | 1.22  | 0.13  | 100000000  | 1.04      | 3.84    |
| 20.45   | 21.14   | 3.92   | -2.23 | -1.61 | -3.31      | -26.01 *  | 43.89   |
| 44.71   | 41      | 4.07   | 3.09  | 1.78  | 9.76       | 27.73 *   | 10.57   |
| 11.62   | 10.31   | 5.25   | 1.34  | 0.19  | 100000000  | 2.62      | 11.42   |
| 44.59   | 39.31   | 5.89   | -1.34 | -0.95 | -1.91      | -13.46    | 46.7    |
| 123.9   | 136.08  | 16.71  | 2.28  | 1.66  | 3.23       | 76.52 *   | 58.94   |
| 47      | 46.57   | 4.71   | -2.91 | -2.1  | -3.89      | -88.88 *  | 116.06  |
| 14.84   | 21.03   | 7.14   | 3.85  | 1.51  | 10.56      | 15.57     | 5.35    |
| 77.54   | 77.15   | 11.83  | -2.22 | -1.53 | -3.22      | -94.45 *  | 145.41  |
| 7.09    | 32.83   | 26.31  | 2.56  | 0     | 8.03       | 20        | 14.8    |
| 52.19   | 46.42   | 6.2    | 1.3   | 0.87  | 2.17       | 10.8      | 43.09   |
| 15.49   | 13.61   | 3.51   | -1.63 | -0.5  | -3.49      | -8.64     | 13.47   |
| 1.74    | 24.68   | 23.7   | -1.37 | -0.5  | -100000000 | -9.21     | 38.34   |
| 24.83   | 19.95   | 5.44   | -1.88 | -1.04 | -3.66      | -17.52    | 29.77   |
| 73.16   | 82      | 9.87   | -2.48 | -1.78 | -3.39      | -121.71 * | 233.27  |
| 2.57    | 30.84   | 28.43  | -1.44 | -0.57 | -100000000 | -13.6     | 44.01   |
| 49.66   | 40.84   | 9.28   | 1.53  | 0.9   | 2.46       | 14.23     | 25.11   |
| 24.93   | 27.34   | 4.21   | -1.45 | -1.03 | -2.06      | -12.25    | 35.32   |
| 18.23   | 16.25   | 4.83   | -2.66 | -1.71 | -5.29      | -27.03 *  | 45.95   |
| 2.9     | 1.85    | 2.71   | -14.2 | -4.01 | -100000000 | -24.48 *  | 23.6    |
| 12.71   | 14.21   | 3.34   | -2.53 | -1.62 | -4.34      | -21.82 *  | 40.26   |
| 30.98   | 31.94   | 2.5    | 1.18  | 0.95  | 1.49       | 4.85      | 27.88   |
| 37.21   | 31.6    | 7.03   | -1.04 | 0     | -2.87      | -1.19     | 60.85   |
| 31.35   | 47.04   | 16.26  | 1.09  | 0.47  | 1.73       | 3.96      | 44.38   |

|        |        |       |       |       |            |           |        |
|--------|--------|-------|-------|-------|------------|-----------|--------|
| 25.28  | 17.51  | 8.27  | 1.83  | 0.4   | 4.37       | 7.96      | 6.99   |
| 40.44  | 28.44  | 12.03 | 1.74  | 0.51  | 3.97       | 12.13     | 15.72  |
| 32.31  | 38.33  | 7.71  | -1.35 | -0.99 | -2.04      | -13.5     | 51.31  |
| 55     | 50.01  | 6.86  | -3.12 | -1.89 | -4.68      | -105.92 * | 122.39 |
| 3.49   | 2.15   | 2.49  | -1.95 | 0     | -100000000 | -2.04     | 1.24   |
| 112.88 | 106.44 | 9.59  | -1.66 | -1.21 | -2.19      | -70.55    | 151.89 |
| 55.03  | 45.04  | 10.29 | -3.33 | -1.84 | -5.92      | -104.93 * | 113.72 |
| 10.16  | 12.08  | 2.64  | 2.25  | 1.02  | 28.08      | 6.72      | 8.13   |
| 18.39  | 17.22  | 3.45  | -2.74 | -1.97 | -4.18      | -29.94 *  | 46.78  |
| 72.34  | 62.36  | 10.33 | 2.32  | 1.62  | 3.21       | 35.53 *   | 27.79  |
| 10.17  | 8.62   | 7.21  | -1.61 | -0.15 | -100000000 | -5.29     | 13.41  |
| 24.03  | 28.48  | 5.72  | 4.68  | 1.92  | 100000000  | 22.4 *    | 3.01   |
| 52.56  | 55.3   | 4.9   | 2.17  | 1.74  | 2.71       | 29.78 *   | 25.6   |
| 7.55   | 5.2    | 4.11  | -9.03 | -3.77 | -100000000 | -41.78 *  | 40.84  |
| 24.17  | 33.74  | 10.27 | 1.12  | 0.54  | 1.87       | 3.69      | 34     |
| 3.75   | 5.02   | 3.65  | -1.54 | 0     | -100000000 | -2.7      | 8.07   |
| 23.31  | 50.25  | 27.65 | 9.65  | 0.8   | 100000000  | 45.04     | 5.59   |
| 17.56  | 16.28  | 2.65  | 1.18  | 0.72  | 2.31       | 2.45      | 13.4   |
| 10.91  | 6.09   | 4.9   | -4.8  | -1.63 | -100000000 | -23.13 *  | 21.8   |
| 6.17   | 15.61  | 9.76  | -2.25 | -0.97 | -100000000 | -19.49    | 41.81  |
| 6.48   | 11.68  | 6.28  | 1.12  | 0.12  | 6.35       | 1.21      | 12.85  |
| 53.54  | 49.24  | 5.17  | 3.04  | 2.11  | 4.86       | 33.02 *   | 18.96  |
| 55.86  | 45.59  | 10.84 | -2.59 | -1.56 | -4.56      | -72.48 *  | 96.05  |
| 40.5   | 41.75  | 2.97  | 1.14  | 0.92  | 1.44       | 4.99      | 37.22  |
| 60.02  | 58.15  | 5.64  | 2.31  | 1.75  | 3.13       | 32.93 *   | 23.36  |
| 5.67   | 8.16   | 3.23  | 2.33  | 0.57  | 100000000  | 4.66      | 1.17   |
| 62.31  | 52.58  | 11.86 | -2.56 | -1.79 | -4.16      | -82.25 *  | 123.85 |
| 144.99 | 149.19 | 22.73 | -1.33 | -1.01 | -1.83      | -49.01    | 195.38 |



| DMSOB70 | baseline mea | baseline mea | comboA70 | comboB70 | experiment r | experiment r | fold change | lower bound c |
|---------|--------------|--------------|----------|----------|--------------|--------------|-------------|---------------|
| 442.68  | 423.25       | 22.87        | 150.1    | 233.94   | 192.21       | 42.92        | -2.2        | -1.59         |
| 675.45  | 653.35       | 24.68        | 313.37   | 355.51   | 333.22       | 26.18        | -1.96       | -1.71         |
| 695.64  | 657.45       | 40.83        | 1080.98  | 1133.29  | 1109.37      | 29.61        | 1.69        | 1.52          |
| 372.7   | 366.48       | 15.93        | 108.92   | 142.21   | 125.74       | 17.59        | -2.91       | -2.34         |
| 1322.43 | 1245.5       | 77.4         | 372.61   | 425.04   | 398.32       | 29.04        | -3.13       | -2.67         |
| 139.6   | 125.11       | 15.31        | 55.67    | 62.41    | 58.77        | 7.39         | -2.13       | -1.59         |
| 1217.08 | 1159.52      | 73.07        | 2094.31  | 2023.28  | 2062.31      | 48.95        | 1.78        | 1.6           |
| 634.2   | 574.71       | 62.48        | 1268.79  | 1123.1   | 1196.87      | 78.07        | 2.08        | 1.7           |
| 506.15  | 431.4        | 77.87        | 956.92   | 831.07   | 894.28       | 73           | 2.07        | 1.54          |
| 1191.99 | 1041.66      | 151.83       | 2332.07  | 2220.45  | 2275.94      | 67.22        | 2.18        | 1.75          |
| 2752.62 | 2926.87      | 181.59       | 5764.96  | 4975.09  | 5363.71      | 410.02       | 1.83        | 1.55          |
| 1060.35 | 1051.34      | 21.68        | 1761.98  | 1701.56  | 1735.14      | 38.64        | 1.65        | 1.57          |
| 402.96  | 369.18       | 34.58        | 150.63   | 186.11   | 168.73       | 18.84        | -2.19       | -1.73         |
| 807.81  | 782.49       | 27.93        | 390.22   | 452.53   | 420.1        | 33.44        | -1.86       | -1.62         |
| 1026.78 | 966.17       | 67.8         | 455.57   | 575.8    | 515.6        | 61.3         | -1.87       | -1.51         |
| 1476.09 | 1452.52      | 46.27        | 879.01   | 878.01   | 878.49       | 30.99        | -1.65       | -1.53         |
| 256.4   | 268.43       | 19.4         | 90.74    | 137.69   | 114.63       | 24.8         | -2.34       | -1.68         |
| 60.7    | 60.84        | 14.05        | 142.92   | 166.7    | 153.78       | 19.58        | 2.53        | 1.69          |

|         |         |        |         |         |         |        |       |       |
|---------|---------|--------|---------|---------|---------|--------|-------|-------|
| 1203.55 | 1133.04 | 77.04  | 224.39  | 293.61  | 258.69  | 35.47  | -4.38 | -3.46 |
| 289.41  | 298.97  | 17.58  | 160.17  | 181.15  | 171.05  | 11.88  | -1.75 | -1.51 |
| 23.16   | 20.82   | 3.75   | 40.96   | 51      | 46.15   | 5.97   | 2.22  | 1.56  |
| 3174.63 | 3171.38 | 76.68  | 1057.86 | 1153.03 | 1102.44 | 61.03  | -2.88 | -2.61 |
| 283.17  | 263.81  | 22.74  | 143.59  | 143.69  | 143.65  | 6.38   | -1.84 | -1.55 |
| 89.74   | 93.38   | 7.21   | 44.01   | 45.76   | 45.12   | 3.57   | -2.07 | -1.72 |
| 469.53  | 431.37  | 49.77  | 949.83  | 900.22  | 926.85  | 50.95  | 2.15  | 1.76  |
| 4464    | 4388.22 | 102.33 | 2308.52 | 2534.4  | 2421.87 | 130.83 | -1.81 | -1.65 |
| 766.61  | 733.63  | 44.91  | 347.91  | 414.95  | 382.07  | 43.49  | -1.92 | -1.57 |
| 679.17  | 605.2   | 73.9   | 142.32  | 200.11  | 171.88  | 31.23  | -3.52 | -2.49 |
| 404.8   | 367.77  | 37.34  | 186.5   | 197.13  | 191.75  | 15.38  | -1.92 | -1.54 |
| 393.73  | 376.32  | 21.43  | 689.12  | 682.7   | 687.01  | 19.78  | 1.83  | 1.65  |
| 371.98  | 384.27  | 17.35  | 191.34  | 215.76  | 202.46  | 18.44  | -1.9  | -1.62 |
| 2806.73 | 2571.04 | 243.53 | 1123.41 | 1199.43 | 1159.16 | 53.86  | -2.22 | -1.84 |
| 762.87  | 815.37  | 56.01  | 426.62  | 461.39  | 443.15  | 21.7   | -1.84 | -1.6  |
| 759.93  | 767.96  | 18.65  | 436.8   | 475.25  | 455.72  | 26.65  | -1.69 | -1.52 |
| 231.91  | 245.21  | 22.75  | 74.51   | 81.92   | 78.3    | 15.59  | -3.13 | -2.25 |
| 483.63  | 532.99  | 53.74  | 200.8   | 165.35  | 182.24  | 22.94  | -2.92 | -2.25 |
| 813.24  | 781.99  | 41.12  | 237.5   | 314.45  | 277.74  | 41.04  | -2.82 | -2.22 |
| 544.73  | 544.35  | 12.21  | 984.37  | 993.14  | 989.11  | 16.8   | 1.82  | 1.74  |
| 241.22  | 240.82  | 11.93  | 441.33  | 440.8   | 441.03  | 16.82  | 1.83  | 1.65  |
| 279.35  | 274.62  | 12.37  | 104.16  | 141.15  | 123.52  | 21.38  | -2.22 | -1.71 |
| 2.72    | 4.32    | 2.18   | 27.14   | 25.69   | 26.29   | 2.42   | 6.09  | 3.24  |
| 255.37  | 259.8   | 8.33   | 131.78  | 131     | 131.3   | 7.27   | -1.98 | -1.79 |
| 1479.53 | 1471.01 | 34.19  | 792.75  | 882.82  | 838.74  | 50.31  | -1.75 | -1.58 |
| 583.11  | 545.75  | 39.99  | 200.42  | 306.3   | 252.46  | 56.88  | -2.16 | -1.54 |
| 141.17  | 141.8   | 8.62   | 64.24   | 76.7    | 69.74   | 8.28   | -2.03 | -1.65 |
| 294.12  | 281.73  | 13.68  | 97.31   | 123.42  | 110.12  | 14.05  | -2.56 | -2.08 |
| 217.15  | 202.5   | 26.64  | 65.43   | 107.71  | 85.21   | 24.33  | -2.38 | -1.5  |
| 28.78   | 24.28   | 5.86   | 60.72   | 53.16   | 57.27   | 6.46   | 2.36  | 1.59  |
| 760.26  | 746.61  | 35.33  | 326.83  | 336.26  | 331.57  | 38.36  | -2.25 | -1.86 |
| 108.46  | 101.17  | 8.72   | 39.22   | 56.45   | 47.9    | 8.74   | -2.11 | -1.56 |
| 133.83  | 133.44  | 6.1    | 63.41   | 69.18   | 65.82   | 5.34   | -2.03 | -1.75 |
| 450.38  | 458.51  | 16.09  | 104.69  | 108.86  | 106.75  | 14.74  | -4.3  | -3.47 |
| 482.99  | 493.6   | 15.79  | 94.69   | 121.97  | 107.53  | 15.11  | -4.59 | -3.7  |
| 514.65  | 487.36  | 28.36  | 205.06  | 246.44  | 225.11  | 22.47  | -2.17 | -1.8  |

|         |         |        |         |         |         |        |       |       |
|---------|---------|--------|---------|---------|---------|--------|-------|-------|
| 136.36  | 119.48  | 18.82  | 16.03   | 29.81   | 23.77   | 9.71   | -5.03 | -2.76 |
| 3023.73 | 2705.82 | 342.79 | 791.69  | 1274.37 | 1027.19 | 253.03 | -2.63 | -1.74 |
| 287.03  | 288.53  | 10.61  | 129     | 125.54  | 127.54  | 6.96   | -2.26 | -2.03 |
| 192.37  | 188.82  | 8.99   | 376.33  | 413.58  | 394.01  | 21.59  | 2.09  | 1.85  |
| 230.83  | 215.49  | 17.48  | 88.94   | 119.16  | 104.57  | 17.19  | -2.06 | -1.56 |
| 6667.52 | 6762.95 | 149.71 | 3640.7  | 3799.42 | 3711.03 | 145.54 | -1.82 | -1.69 |
| 5671.05 | 5816.73 | 186.34 | 3494.72 | 3431.63 | 3460.7  | 116.66 | -1.68 | -1.56 |
| 25.57   | 28.83   | 6.13   | 61.71   | 61.96   | 61.84   | 3.88   | 2.15  | 1.56  |
| 18.61   | 14.23   | 5.34   | 58.7    | 60.99   | 59.66   | 3.82   | 4.19  | 2.55  |
| 659.72  | 625.21  | 37.64  | 223.67  | 253.71  | 238.11  | 18.01  | -2.63 | -2.24 |
| 176.79  | 165.91  | 13.26  | 79.6    | 83.56   | 81.32   | 7.12   | -2.04 | -1.68 |
| 2799.22 | 2985.37 | 199.9  | 1716.08 | 1354.03 | 1535.57 | 187.5  | -1.94 | -1.56 |
| 190.3   | 184.77  | 11.53  | 98.66   | 85.8    | 91.31   | 11.98  | -2.02 | -1.62 |
| 422.06  | 415.98  | 13.72  | 190.55  | 213.36  | 201.37  | 16.6   | -2.07 | -1.8  |
| 629.42  | 565.04  | 64.94  | 78.16   | 134.16  | 105.59  | 30.66  | -5.35 | -3.43 |
| 47.96   | 46.01   | 5.05   | 8.11    | 12.72   | 10.36   | 4.27   | -4.44 | -2.54 |
| 1072.73 | 1055.77 | 25.34  | 483.42  | 602.33  | 543.1   | 61.9   | -1.94 | -1.63 |
| 62.56   | 62.7    | 6.09   | 126.83  | 111.74  | 119.7   | 10.1   | 1.91  | 1.55  |
| 1668.23 | 1603.87 | 74.45  | 768.84  | 958.86  | 862.54  | 106.63 | -1.86 | -1.52 |
| 36.66   | 41.03   | 5.96   | 9.61    | 12.64   | 11.13   | 4.65   | -3.69 | -2.03 |
| 115.27  | 124.34  | 11.11  | 31.23   | 23.46   | 27.89   | 7.02   | -4.46 | -3.04 |
| 242.26  | 246.97  | 10.96  | 92.53   | 130.02  | 109.95  | 20.72  | -2.25 | -1.7  |
| 141.72  | 153.34  | 16.06  | 60.98   | 59.11   | 60.24   | 7.48   | -2.55 | -1.95 |
| 189.87  | 169.31  | 22.74  | 49.4    | 52      | 51.09   | 7.53   | -3.31 | -2.38 |
| 426.13  | 404.69  | 23.54  | 139.85  | 192.22  | 163.36  | 29.6   | -2.48 | -1.87 |
| 272.41  | 270.96  | 17.32  | 150.86  | 143.82  | 148.23  | 8.51   | -1.83 | -1.58 |
| 14.28   | 18.31   | 5.11   | 49.83   | 41.9    | 46.08   | 7.11   | 2.52  | 1.56  |
| 64.02   | 52.69   | 12.75  | 122.07  | 114.62  | 118.1   | 8.87   | 2.24  | 1.56  |
| 30.15   | 31.21   | 4.38   | 7.45    | 13      | 10.3    | 3.57   | -3.03 | -1.79 |
| 666.1   | 639.3   | 31.07  | 332.53  | 384.93  | 358.57  | 30.41  | -1.78 | -1.53 |
| 21.2    | 20.37   | 2.17   | 40.79   | 41.08   | 40.91   | 2.49   | 2.01  | 1.66  |
| 46.1    | 44.43   | 7.03   | 92.83   | 99.01   | 95.65   | 5.69   | 2.15  | 1.67  |
| 10.27   | 11.4    | 5.08   | 36.88   | 30.81   | 33.08   | 4.91   | 2.9   | 1.56  |
| 47.09   | 44.64   | 4.81   | 17.55   | 15.19   | 16.3    | 3.43   | -2.74 | -1.92 |
| 108.73  | 109.23  | 6.26   | 61.45   | 58.57   | 60.3    | 5.89   | -1.81 | -1.51 |
| 255.8   | 293.47  | 39.34  | 72.32   | 53.27   | 62.24   | 13.2   | -4.72 | -3.19 |

|         |         |        |         |         |         |        |        |       |
|---------|---------|--------|---------|---------|---------|--------|--------|-------|
| 402.21  | 375.06  | 29.27  | 740.38  | 689.67  | 716.73  | 34.96  | 1.91   | 1.65  |
| 436.93  | 468.61  | 41.24  | 242.12  | 224.51  | 234.35  | 15.01  | -2     | -1.66 |
| 1094.8  | 1106.8  | 44.63  | 504.09  | 541.98  | 520.25  | 28.86  | -2.13  | -1.9  |
| 1530.57 | 1510.57 | 42.02  | 2941.75 | 2823.72 | 2882.69 | 74.42  | 1.91   | 1.79  |
| 2090.8  | 2093.23 | 36.95  | 1024.5  | 1234.49 | 1128.44 | 106.94 | -1.85  | -1.6  |
| 363.67  | 363.16  | 10.85  | 642.46  | 692.37  | 666.43  | 29.52  | 1.84   | 1.68  |
| 561.76  | 548.01  | 24.04  | 950.62  | 914.09  | 931.73  | 37.37  | 1.7    | 1.54  |
| 1466.58 | 1453.53 | 37.55  | 828.8   | 912.36  | 870     | 45.43  | -1.67  | -1.52 |
| 175.26  | 167.04  | 12.95  | 69.68   | 85.33   | 76.69   | 10.19  | -2.18  | -1.71 |
| 338.73  | 383.66  | 49.92  | 768.09  | 704.02  | 740.9   | 50.05  | 1.93   | 1.54  |
| 963.78  | 951.04  | 22.38  | 484.25  | 530.78  | 509.57  | 28.49  | -1.87  | -1.69 |
| 542.89  | 523.53  | 25.62  | 208.62  | 258.4   | 233.83  | 26.89  | -2.24  | -1.85 |
| 109.54  | 109.8   | 11.94  | 269.66  | 264.94  | 267.27  | 26.65  | 2.43   | 1.91  |
| 1487.86 | 1565.21 | 90.33  | 706.87  | 845.32  | 777.75  | 72.85  | -2.01  | -1.69 |
| 248.92  | 245.5   | 12.84  | 93.1    | 102.84  | 96.81   | 9.96   | -2.54  | -2.12 |
| 506.87  | 501.38  | 14.05  | 151.42  | 153.54  | 152.56  | 16.35  | -3.29  | -2.77 |
| 270.31  | 239.15  | 32.5   | 56.42   | 97.26   | 76.53   | 21.38  | -3.13  | -1.98 |
| 579.28  | 584.84  | 14.94  | 107.42  | 135.66  | 122.6   | 17.25  | -4.77  | -3.86 |
| 119.37  | 116.55  | 12.35  | 48.79   | 55.52   | 51.43   | 12.33  | -2.27  | -1.54 |
| 357.68  | 380.47  | 25.62  | 17.02   | 37.05   | 26.52   | 10.8   | -14.35 | -8.46 |
| 406.51  | 422.03  | 22.67  | 219.13  | 201.53  | 210.45  | 13.11  | -2.01  | -1.75 |
| 3817.99 | 3352.34 | 510.52 | 510.03  | 1007.81 | 754.14  | 258.38 | -4.45  | -2.6  |
| 35.92   | 31.65   | 4.48   | 6.16    | 4.86    | 5.66    | 2.71   | -5.59  | -2.94 |
| 85.53   | 90.2    | 6.77   | 42.8    | 43.03   | 42.89   | 3.3    | -2.1   | -1.76 |
| 218.23  | 211.27  | 14.35  | 389.15  | 358.34  | 372.67  | 18.29  | 1.76   | 1.54  |
| 53.61   | 58.74   | 6.77   | 112.67  | 109.22  | 110.5   | 8.08   | 1.88   | 1.52  |
| 173.61  | 176.04  | 5.8    | 102.21  | 102.13  | 102.17  | 5.46   | -1.72  | -1.56 |
| 51.78   | 50.98   | 4.02   | 13.46   | 16.55   | 14.41   | 3.38   | -3.54  | -2.48 |
| 116.59  | 115.33  | 4.37   | 65.72   | 50.88   | 58.48   | 9.56   | -1.97  | -1.54 |
| 2.64    | 2.71    | 3.71   | 33.96   | 29.66   | 31.7    | 3.26   | 11.7   | 3.52  |
| 123.91  | 125.6   | 7.78   | 66.98   | 54.02   | 60.03   | 9.04   | -2.09  | -1.63 |
| 302.53  | 296.67  | 12.36  | 580.62  | 566.44  | 574.89  | 19.53  | 1.94   | 1.77  |
| 6.93    | 9.35    | 4.41   | 34.76   | 33.78   | 34.16   | 2.85   | 3.65   | 2.01  |
| 351.99  | 351.14  | 8.55   | 733.39  | 682.88  | 709.05  | 29.83  | 2.02   | 1.86  |
| 1746.29 | 1640.26 | 116.41 | 3106.18 | 2730.71 | 2914.7  | 198.36 | 1.78   | 1.51  |
| 38.75   | 40.82   | 4.97   | 7.56    | 16.59   | 12.17   | 5.14   | -3.35  | -1.88 |

|         |         |        |         |         |         |        |       |       |
|---------|---------|--------|---------|---------|---------|--------|-------|-------|
| 2410.28 | 2317.35 | 109.44 | 702.9   | 918.58  | 809.85  | 108.79 | -2.86 | -2.31 |
| 2205.45 | 2210.4  | 64.1   | 782.95  | 812.2   | 799.38  | 25.83  | -2.77 | -2.58 |
| 1447.87 | 1541.2  | 108.2  | 759.26  | 900.07  | 832.61  | 80     | -1.85 | -1.53 |
| 3827.43 | 3802.2  | 173.07 | 2173.66 | 2125.18 | 2148.03 | 116.37 | -1.77 | -1.58 |
| 269.89  | 289.23  | 21.19  | 167.15  | 146.22  | 158.13  | 14.34  | -1.83 | -1.51 |
| 299.09  | 302.61  | 16.07  | 680.5   | 640.02  | 664.64  | 28.7   | 2.2   | 1.96  |
| 424.74  | 411.02  | 19.93  | 692.7   | 710.5   | 699.85  | 18.5   | 1.7   | 1.56  |
| 316.84  | 377.33  | 65.75  | 1004.88 | 774.24  | 888.93  | 122.9  | 2.36  | 1.64  |
| 762.45  | 740.61  | 31.3   | 1630.61 | 1406.52 | 1519.35 | 121.56 | 2.05  | 1.76  |
| 376.7   | 349.88  | 30.76  | 145.33  | 194.28  | 166.13  | 29.44  | -2.11 | -1.56 |
| 950.29  | 1032.04 | 91.16  | 1894.74 | 2037.84 | 1966.19 | 75.31  | 1.91  | 1.64  |
| 292.71  | 268.93  | 25.66  | 106.73  | 81.3    | 94.2    | 14.86  | -2.85 | -2.14 |
| 645.55  | 639.71  | 13.6   | 375.56  | 370.58  | 372.43  | 8.63   | -1.72 | -1.63 |
| 623.98  | 639.18  | 22.08  | 348.4   | 397.39  | 374.12  | 26.47  | -1.71 | -1.51 |
| 237.86  | 245.06  | 12.56  | 418.97  | 436.77  | 425.81  | 22.84  | 1.74  | 1.54  |
| 753.49  | 736.94  | 20.87  | 404.76  | 382.15  | 394.66  | 15.8   | -1.87 | -1.72 |
| 465.45  | 453.13  | 15.81  | 737.9   | 749.24  | 744.3   | 14.73  | 1.64  | 1.54  |
| 467.95  | 427     | 41.61  | 165.94  | 222.1   | 193.95  | 29.3   | -2.2  | -1.66 |
| 125.14  | 126.7   | 10.37  | 19.21   | 35.43   | 27.42   | 8.82   | -4.62 | -2.94 |
| 556.59  | 570.25  | 23.74  | 82.12   | 164.97  | 123.49  | 41.44  | -4.62 | -2.96 |
| 323.53  | 320.76  | 14.91  | 162.3   | 185.85  | 173.47  | 19.98  | -1.85 | -1.53 |
| 258.62  | 237.26  | 22.09  | 21.24   | 30.95   | 26.16   | 5.82   | -9.07 | -6.36 |
| 246.59  | 253.66  | 13.75  | 149.22  | 146.15  | 147.83  | 7.92   | -1.72 | -1.51 |
| 35.3    | 36.44   | 3.01   | 75.92   | 69.1    | 72.91   | 5.91   | 2     | 1.65  |
| 64.18   | 64.46   | 3.31   | 28.89   | 30.6    | 29.71   | 3.36   | -2.17 | -1.79 |
| 26.09   | 25.11   | 3.17   | 5.15    | 2.49    | 3.48    | 3.5    | -7.21 | -2.62 |
| 85.13   | 81.06   | 8.27   | 37.09   | 42.54   | 39.34   | 5.74   | -2.06 | -1.55 |
| 161.55  | 148.19  | 13.67  | 364.89  | 311.22  | 337.53  | 28.97  | 2.28  | 1.85  |
| 592.75  | 531.6   | 63.48  | 133.03  | 234.54  | 181.99  | 52.96  | -2.92 | -1.86 |
| 22.01   | 19.85   | 8.64   | 59.65   | 54.17   | 56.35   | 5.3    | 2.84  | 1.61  |
| 280.47  | 228.04  | 52.58  | 643.63  | 634.48  | 639.41  | 26.74  | 2.8   | 2.02  |
| 30.92   | 30.22   | 3.23   | 5.71    | 9.92    | 8.14    | 3.76   | -3.71 | -2.03 |
| 53.7    | 51.3    | 4.8    | 102.52  | 93.17   | 97.63   | 6.97   | 1.9   | 1.57  |
| 23.44   | 26.19   | 3.82   | 47.6    | 55.5    | 51.93   | 5.11   | 1.98  | 1.5   |
| 16.47   | 12.29   | 5.45   | 33.65   | 33.47   | 33.56   | 3.8    | 2.73  | 1.51  |
| 1216.03 | 1156.78 | 70.6   | 2069.88 | 2165.89 | 2114.76 | 63.3   | 1.83  | 1.64  |

|         |         |        |         |         |         |        |       |       |
|---------|---------|--------|---------|---------|---------|--------|-------|-------|
| 37.67   | 40.65   | 4.3    | 11.19   | 10.49   | 10.75   | 1.89   | -3.78 | -2.75 |
| 715.21  | 675.59  | 41.61  | 364.14  | 381.86  | 371.15  | 24.15  | -1.82 | -1.57 |
| 40.28   | 41.24   | 4.31   | 105.22  | 110.51  | 107.41  | 8.09   | 2.6   | 2.12  |
| 113.84  | 121.36  | 9.82   | 54.46   | 66.28   | 60.09   | 7.65   | -2.02 | -1.59 |
| 247.75  | 242.33  | 9.75   | 125.52  | 111.39  | 117.78  | 10.86  | -2.06 | -1.76 |
| 16.2    | 13.83   | 3.89   | 31.75   | 37.2    | 34.07   | 3.8    | 2.46  | 1.6   |
| 885.96  | 890.89  | 20.37  | 490.17  | 536.87  | 513.13  | 26.15  | -1.74 | -1.59 |
| 3376.66 | 3593.62 | 229.87 | 1883.53 | 1959.38 | 1913.73 | 61.59  | -1.88 | -1.66 |
| 129.86  | 138.7   | 12.1   | 65.26   | 75.89   | 70.58   | 8.77   | -1.97 | -1.54 |
| 239.52  | 245.81  | 13.01  | 92.39   | 137.03  | 114.36  | 23.77  | -2.15 | -1.58 |
| 599.33  | 576.63  | 29.01  | 301.88  | 321.25  | 311.12  | 22.32  | -1.85 | -1.61 |
| 505.9   | 499.72  | 15.94  | 244.95  | 273.27  | 260.07  | 19.87  | -1.92 | -1.69 |
| 51.36   | 49.21   | 8.73   | 129.63  | 120.7   | 124.66  | 9.21   | 2.53  | 1.9   |
| 87.81   | 85.7    | 9.03   | 46.35   | 38.83   | 42.01   | 6.72   | -2.04 | -1.51 |
| 603     | 596.62  | 17.35  | 993.24  | 984.03  | 989.8   | 17.81  | 1.66  | 1.57  |
| 431.94  | 410.63  | 23.52  | 118.3   | 179.23  | 147.42  | 32.05  | -2.79 | -2.02 |
| 643.77  | 682.64  | 42.97  | 386     | 388.86  | 387.57  | 14.57  | -1.76 | -1.56 |
| 356.46  | 329.96  | 27.37  | 152.46  | 155.76  | 153.78  | 7.12   | -2.15 | -1.82 |
| 118.53  | 119.77  | 8.11   | 60.7    | 40.46   | 50.94   | 12.95  | -2.35 | -1.62 |
| 69.03   | 76.54   | 8.81   | 13.73   | 28.43   | 20.99   | 8.73   | -3.65 | -2.07 |
| 359.92  | 321.53  | 39.61  | 83.78   | 170.13  | 126.72  | 43.8   | -2.54 | -1.53 |
| 86.44   | 80.88   | 7.23   | 32.86   | 37.01   | 34.99   | 7.03   | -2.31 | -1.67 |
| 1414.01 | 1376    | 44.3   | 2412.41 | 2329.96 | 2364.6  | 64.15  | 1.72  | 1.6   |
| 597.64  | 605.36  | 19.42  | 328.63  | 337.47  | 334.59  | 14.46  | -1.81 | -1.66 |
| 224.73  | 236.12  | 16.73  | 118.77  | 109.2   | 114.82  | 8.84   | -2.06 | -1.73 |
| 1452.15 | 1397.64 | 59.09  | 642.02  | 845.96  | 742.75  | 103.19 | -1.88 | -1.51 |
| 486.29  | 485.42  | 18.46  | 205.18  | 237.23  | 221.52  | 19.78  | -2.19 | -1.88 |
| 603.69  | 609     | 15.47  | 322.31  | 368.19  | 346.33  | 25.92  | -1.76 | -1.55 |
| 66.08   | 52.68   | 13.58  | 189.46  | 163.19  | 175.42  | 16.43  | 3.33  | 2.25  |
| 259.83  | 257.19  | 10.18  | 131.37  | 131.82  | 131.62  | 5.07   | -1.95 | -1.78 |
| 29.85   | 35.11   | 6.62   | 7.8     | 9.84    | 8.38    | 4.5    | -4.19 | -2    |
| 162.45  | 165.39  | 9.2    | 308.14  | 315.69  | 312.31  | 10.93  | 1.89  | 1.7   |
| 294     | 281.17  | 17.4   | 119.22  | 145.58  | 132.37  | 14.31  | -2.12 | -1.75 |
| 146.01  | 162.23  | 18.34  | 58.69   | 70.21   | 63.26   | 9.06   | -2.56 | -1.91 |
| 417.94  | 415.08  | 15.57  | 145.77  | 163.57  | 153.61  | 15.34  | -2.7  | -2.29 |
| 174.38  | 169.65  | 10.35  | 292.88  | 299.51  | 297.03  | 8.92   | 1.75  | 1.57  |

|        |         |       |         |         |         |        |       |       |
|--------|---------|-------|---------|---------|---------|--------|-------|-------|
| 179.82 | 165.33  | 16.03 | 49.7    | 51.05   | 50.55   | 6.09   | -3.27 | -2.54 |
| 85.24  | 91.11   | 9.11  | 30.69   | 34.76   | 33.04   | 6.13   | -2.76 | -2    |
| 153.89 | 136.54  | 18.97 | 44.97   | 62.45   | 53.19   | 11.28  | -2.57 | -1.73 |
| 165.62 | 149.58  | 18.13 | 32.95   | 77.14   | 54.89   | 22.46  | -2.73 | -1.55 |
| 75.29  | 67.44   | 10.06 | 22.07   | 30.46   | 25.94   | 6.29   | -2.6  | -1.68 |
| 32.02  | 29.7    | 3.85  | 70.16   | 65.88   | 67.96   | 6.27   | 2.29  | 1.77  |
| 402.97 | 383.92  | 27.86 | 128.29  | 189.81  | 158.56  | 31.54  | -2.42 | -1.77 |
| 223.17 | 255.82  | 34.12 | 51.77   | 79.59   | 64.86   | 14.98  | -3.94 | -2.62 |
| 137.94 | 141.39  | 9.33  | 367.59  | 318.76  | 342.52  | 28.93  | 2.42  | 2.02  |
| 53.81  | 56.82   | 5.42  | 131.46  | 119.6   | 124.47  | 8.94   | 2.19  | 1.81  |
| 65.67  | 65.82   | 5.62  | 174.25  | 163.56  | 168.8   | 9.97   | 2.56  | 2.17  |
| 274.17 | 242.39  | 32.97 | 72.05   | 116.51  | 92.32   | 25.02  | -2.63 | -1.68 |
| 357.03 | 375.71  | 23.25 | 641.82  | 713.23  | 676.35  | 38.37  | 1.8   | 1.57  |
| 149.16 | 156.92  | 10.56 | 75.59   | 79.39   | 77.32   | 6.13   | -2.03 | -1.71 |
| 96.2   | 95.5    | 4.84  | 40.76   | 35.1    | 38.33   | 5.98   | -2.49 | -1.95 |
| 125.46 | 114.92  | 11.62 | 37.16   | 41.31   | 38.88   | 7.81   | -2.96 | -2.1  |
| 162.91 | 171.82  | 12.93 | 96.66   | 76.34   | 86.76   | 13.45  | -1.98 | -1.52 |
| 149    | 152.48  | 9.11  | 81.13   | 78.82   | 79.99   | 6.39   | -1.91 | -1.62 |
| 692.78 | 687.7   | 28.83 | 256.43  | 398.66  | 326.63  | 72.55  | -2.11 | -1.53 |
| 92.97  | 87.73   | 7.79  | 32.99   | 31.36   | 32.12   | 5.38   | -2.73 | -2.04 |
| 240.42 | 237.73  | 7.52  | 141.89  | 101.08  | 121.47  | 21.1   | -1.96 | -1.51 |
| 63.75  | 64.32   | 5.82  | 21.49   | 18.82   | 20.54   | 5.12   | -3.13 | -2.14 |
| 133.69 | 137.57  | 8.14  | 73.96   | 68.28   | 71.56   | 7.13   | -1.92 | -1.6  |
| 243.44 | 252.37  | 11.77 | 152.55  | 131.23  | 141.76  | 13.25  | -1.78 | -1.51 |
| 40.65  | 37.86   | 4.84  | 16.23   | 47.01   | 33.21   | 16.78  | -1.14 | -0.59 |
| 888.44 | 849.85  | 46.42 | 553.9   | 971.09  | 761.33  | 209.56 | -1.12 | -0.76 |
| 70.96  | 59.4    | 12.59 | 31.35   | 25.03   | 27.55   | 5.06   | -2.16 | -1.31 |
| 33.33  | 30.38   | 3.78  | 11.74   | 29      | 20.1    | 8.98   | -1.51 | -0.83 |
| 455.85 | 480.08  | 27.54 | 448.76  | 380.51  | 414.84  | 37.57  | -1.16 | -0.98 |
| 257.04 | 205.86  | 51.61 | 79.96   | 103.21  | 92.12   | 15.36  | -2.23 | -1.25 |
| 350.52 | 308.14  | 43.28 | 99.36   | 210.56  | 154.81  | 57.2   | -1.99 | -1.15 |
| 586.4  | 587.07  | 22.32 | 312.32  | 476.74  | 394.41  | 86.72  | -1.49 | -1.09 |
| 61.87  | 54.8    | 10.88 | 42.7    | 41.08   | 41.97   | 12.32  | -1.31 | -0.75 |
| 1611.8 | 1607.19 | 35.79 | 1943.81 | 1772.39 | 1858.88 | 90.59  | 1.16  | 1.06  |
| 672.62 | 682.44  | 15.12 | 491.67  | 639.95  | 565.29  | 74.58  | -1.21 | -0.99 |
| 8.94   | 8.9     | 2.48  | 18.31   | 11.64   | 14.45   | 4.87   | 1.62  | 0.67  |

|          |         |        |          |          |          |        |       |       |
|----------|---------|--------|----------|----------|----------|--------|-------|-------|
| 413.26   | 418.86  | 15.14  | 373.71   | 413.28   | 394.48   | 23.04  | -1.06 | -0.95 |
| 52.81    | 54.18   | 6.08   | 28.91    | 52.15    | 40.59    | 11.89  | -1.33 | -0.85 |
| 28.74    | 26.61   | 3.4    | 16.81    | 18.33    | 17.69    | 3.01   | -1.5  | -1.07 |
| 19.89    | 13.63   | 9.17   | 4.98     | 6.78     | 5.79     | 3.81   | -2.35 | 0     |
| 12.34    | 8.72    | 4.55   | 6.64     | 12.76    | 10.62    | 4.55   | 1.22  | 0.32  |
| 21.68    | 17.44   | 6.52   | 26.38    | 10.06    | 17.07    | 11.62  | -1.02 | -0.31 |
| 1144.36  | 1170.61 | 46.44  | 1627.17  | 1515.71  | 1573.45  | 67.72  | 1.34  | 1.22  |
| 2271.54  | 2193.43 | 84.49  | 1847.74  | 2016.3   | 1926.85  | 94.17  | -1.14 | -1.03 |
| 1336.46  | 1199.74 | 137.42 | 1757.46  | 1504.37  | 1630.32  | 132.4  | 1.36  | 1.09  |
| 21.83    | 28.14   | 7.47   | 24.34    | 9.2      | 17.15    | 8.29   | -1.64 | -0.72 |
| 31.76    | 29.68   | 8.05   | 24.31    | 17.29    | 21.61    | 11.99  | -1.37 | -0.57 |
| 42.3     | 40.03   | 6.79   | 51.14    | 52.21    | 51.65    | 6.29   | 1.29  | 0.93  |
| 362.8    | 359.81  | 10.67  | 262.18   | 300.56   | 280.86   | 21.47  | -1.28 | -1.13 |
| 12.74    | 17.96   | 5.88   | 15.65    | 19.44    | 16.58    | 7.56   | -1.08 | -0.42 |
| 29.54    | 23      | 8.41   | 24.46    | 34.63    | 29.33    | 6.06   | 1.28  | 0.68  |
| 12629.35 | 12359.2 | 310.95 | 11963.41 | 12224.56 | 12083.48 | 193.26 | -1.02 | -0.97 |
| 842.3    | 796.16  | 47.38  | 533.49   | 610.54   | 570.92   | 40.8   | -1.39 | -1.2  |
| 22.2     | 25.04   | 5.4    | 32.75    | 33.21    | 33.05    | 4.47   | 1.32  | 0.89  |
| 271.27   | 220.65  | 51.09  | 77.25    | 150.45   | 113      | 37.68  | -1.95 | -1.02 |
| 4.1      | 4.39    | 2.8    | 6.76     | 21.19    | 13.9     | 7.46   | 3.16  | 0.35  |
| 18.68    | 16.94   | 6.06   | 22.4     | 19.88    | 21.1     | 4.94   | 1.25  | 0.64  |
| 45.33    | 49.81   | 6.72   | 56.21    | 66.74    | 61.67    | 6.49   | 1.24  | 0.94  |
| 430.76   | 433.2   | 19.26  | 1093.98  | 764.39   | 927.29   | 174.02 | 2.14  | 1.47  |
| 6.17     | 24.14   | 18.29  | 36.11    | 54.33    | 45.54    | 9.35   | 1.89  | 0.75  |
| 657.97   | 652.76  | 14.94  | 559.95   | 558.46   | 558.99   | 26.08  | -1.17 | -1.07 |
| 4355.83  | 4604.95 | 288.71 | 4346.86  | 3886.98  | 4120.52  | 245.96 | -1.12 | -0.97 |
| 5436.86  | 5578.98 | 198.8  | 5489.76  | 4627.93  | 5060.19  | 444.51 | -1.1  | -0.95 |
| 271.11   | 274.17  | 13.27  | 208.76   | 229.6    | 218.37   | 12.69  | -1.26 | -1.11 |
| 240.14   | 202.29  | 42.19  | 75.34    | 129.49   | 102.55   | 32.44  | -1.97 | -1.09 |
| 125.13   | 106.34  | 21.89  | 30.24    | 69.51    | 48.82    | 21.03  | -2.18 | -1.1  |
| 383.22   | 347.09  | 45.75  | 513.12   | 389.77   | 452.2    | 68.91  | 1.3   | 0.92  |
| 6.05     | 4.29    | 3.37   | 6.71     | 8.78     | 7.68     | 8.88   | 1.79  | 0     |
| 65.6     | 62.75   | 5.03   | 66.6     | 56.54    | 62.38    | 6.73   | -1.01 | -0.81 |
| 270.66   | 246.72  | 24.26  | 141.04   | 175.49   | 158.85   | 17.74  | -1.55 | -1.22 |
| 92.1     | 105.74  | 14.39  | 80.58    | 72.77    | 76.05    | 6.92   | -1.39 | -1.04 |
| 63.47    | 54.52   | 9.5    | 90.78    | 75.21    | 83.45    | 9.09   | 1.53  | 1.11  |



|         |         |        |         |         |         |        |        |       |
|---------|---------|--------|---------|---------|---------|--------|--------|-------|
| 50.43   | 47.33   | 6.79   | 21.76   | 21.74   | 21.75   | 5.02   | -2.18  | -1.43 |
| 549.17  | 482.36  | 67.44  | 867.96  | 857.52  | 862.61  | 22.98  | 1.79   | 1.45  |
| 2.36    | 2.83    | 1.24   | 3.35    | 11.68   | 7.18    | 4.65   | 2.53   | 0     |
| 7322.28 | 7358.43 | 108.6  | 4388.58 | 5022.25 | 4706.09 | 333.88 | -1.56  | -1.4  |
| 3.73    | 14.92   | 11.39  | 34.98   | 32.98   | 33.91   | 2.58   | 2.27   | 0.99  |
| 6789.82 | 6878.7  | 140.86 | 4554.82 | 4972.59 | 4761.77 | 241.39 | -1.44  | -1.32 |
| 20.21   | 21      | 4.46   | 18.46   | 15.14   | 16.79   | 3.97   | -1.25  | -0.73 |
| 107.96  | 110.17  | 9.47   | 75.91   | 84.82   | 80.78   | 11.93  | -1.36  | -1.04 |
| 19.32   | 20.74   | 2.96   | 13.43   | 8.85    | 10.69   | 3.78   | -1.94  | -1.14 |
| 104.81  | 98.81   | 8.15   | 57.39   | 52.94   | 55.87   | 7.7    | -1.77  | -1.37 |
| 42.02   | 43.91   | 5.32   | 39      | 22.21   | 30.26   | 10.37  | -1.45  | -0.88 |
| 12.91   | 13.45   | 8.47   | 22.61   | 17.47   | 19.75   | 9.65   | 1.47   | 0.26  |
| 11.68   | 11.08   | 2.33   | 2.12    | 7.07    | 4.42    | 3.02   | -2.51  | -1.05 |
| 1264.25 | 1546.94 | 287.86 | 135.83  | 138.94  | 137.44  | 12.96  | -11.26 | -7.61 |
| 9.07    | 6.74    | 6.98   | 15.21   | 4.12    | 8.88    | 8.64   | 1.32   | 0     |
| 205.56  | 239.8   | 35.89  | 747.14  | 531.4   | 639.03  | 110.06 | 2.66   | 1.79  |
| 1894.14 | 1916.53 | 88.27  | 1275.48 | 2073.13 | 1671.9  | 401.62 | -1.15  | -0.81 |
| 68.66   | 63.03   | 7.25   | 57.62   | 40.43   | 48.57   | 10.07  | -1.3   | -0.9  |
| 91.44   | 91.95   | 6.61   | 227.98  | 150.43  | 189.39  | 39.56  | 2.06   | 1.33  |
| 185.67  | 160.71  | 25.66  | 54.42   | 70.64   | 62.66   | 13.99  | -2.56  | -1.66 |
| 230.76  | 263.57  | 45.41  | 607.59  | 876.65  | 737.64  | 141.91 | 2.8    | 1.78  |
| 676.34  | 602.9   | 74.39  | 527.12  | 508.27  | 517.09  | 12.81  | -1.17  | -0.93 |
| 41.39   | 39.92   | 5.07   | 35.44   | 35.87   | 35.64   | 3.75   | -1.12  | -0.84 |
| 44.07   | 46.11   | 4.45   | 35.84   | 42.82   | 39.4    | 6.1    | -1.17  | -0.88 |
| 408.12  | 337.74  | 70.64  | 16.11   | 72.52   | 44.07   | 29.57  | -7.66  | -3.23 |
| 386.08  | 390.33  | 11.32  | 676.66  | 495.03  | 585.46  | 92.83  | 1.5    | 1.11  |
| 160.87  | 162.84  | 6.26   | 99.46   | 118.26  | 108.42  | 11.61  | -1.5   | -1.26 |
| 55.28   | 49.29   | 7.16   | 31.75   | 28.17   | 29.67   | 4.12   | -1.66  | -1.18 |
| 112.65  | 102.16  | 12.63  | 50.32   | 54.16   | 52.03   | 5.8    | -1.96  | -1.48 |
| 8.82    | 9.06    | 2.1    | 24.36   | 25.06   | 24.67   | 3.82   | 2.72   | 1.76  |
| 36.38   | 40.81   | 6.27   | 44.12   | 34.98   | 39.54   | 6.54   | -1.03  | -0.71 |
| 61.84   | 47.92   | 15.5   | 52.15   | 20.9    | 36.06   | 17.52  | -1.33  | -0.51 |
| 19.31   | 13.23   | 6.29   | 5.41    | 8.05    | 7.09    | 2.86   | -1.87  | -0.39 |
| 493.69  | 433.3   | 61.46  | 143.57  | 168.58  | 154.26  | 19.82  | -2.81  | -2.03 |
| 81.39   | 76.98   | 9.37   | 19.12   | 42.72   | 31.35   | 12.91  | -2.46  | -1.39 |
| 23.22   | 23.86   | 7.6    | 29.9    | 39.45   | 34.26   | 10.79  | 1.44   | 0.62  |

|        |        |       |        |        |        |       |       |       |
|--------|--------|-------|--------|--------|--------|-------|-------|-------|
| 29.62  | 34.93  | 5.52  | 8.54   | 22.88  | 16.01  | 7.93  | -2.18 | -1.11 |
| 246.21 | 216.11 | 34.72 | 64.89  | 79.37  | 72.03  | 17.09 | -3    | -1.91 |
| 20     | 31.14  | 11.46 | 8.31   | 2.49   | 5.01   | 3.5   | -6.22 | -1.88 |
| 74.36  | 63.3   | 12.63 | 21.5   | 25.87  | 23.69  | 6.41  | -2.67 | -1.55 |
| 38.99  | 34.84  | 7.46  | 15.01  | 27.64  | 21.09  | 7.68  | -1.65 | -0.87 |
| 48.99  | 45.44  | 6.16  | 18.5   | 22.99  | 20.53  | 5.12  | -2.21 | -1.44 |
| 20.92  | 20.25  | 2.5   | 33.33  | 23.46  | 28.58  | 5.93  | 1.41  | 0.9   |
| 30.08  | 33.2   | 5.82  | 7.91   | 30.76  | 19.11  | 11.91 | -1.74 | -0.79 |
| 31.79  | 30.55  | 4.5   | 23.8   | 12.48  | 18.08  | 6.81  | -1.69 | -0.97 |
| 109.56 | 111.35 | 6.46  | 44.88  | 70.74  | 57.76  | 13.24 | -1.93 | -1.38 |
| 303.29 | 274.91 | 29.47 | 105.11 | 169.3  | 137.43 | 32.78 | -2    | -1.36 |
| 95.14  | 83.8   | 12.42 | 27.35  | 27.92  | 27.61  | 4.26  | -3.04 | -2.12 |
| 107.86 | 123.79 | 17.8  | 118.41 | 110.1  | 115.01 | 5.5   | -1.08 | -0.81 |
| 13.56  | 8.02   | 5.77  | 13.75  | 2.71   | 8.44   | 6.15  | 1.05  | 0     |
| 19.19  | 30.35  | 11.79 | 30.64  | 26.51  | 28.52  | 2.84  | -1.06 | -0.38 |
| 245.02 | 215.26 | 30.18 | 65.62  | 127.46 | 96.42  | 31.05 | -2.23 | -1.35 |
| 78.73  | 78.74  | 5.84  | 43.45  | 54.41  | 48.44  | 8.42  | -1.63 | -1.22 |
| 6.78   | 9.13   | 2.86  | 39.68  | 23.66  | 31.38  | 8.69  | 3.44  | 1.66  |
| 29.2   | 31.07  | 6.26  | 180.84 | 91.5   | 135.94 | 46.85 | 4.38  | 1.82  |
| 11.2   | 10.54  | 4.02  | 26.28  | 22.98  | 24.44  | 3.29  | 2.32  | 1.34  |
| 215.95 | 259.11 | 45.26 | 157.94 | 106.96 | 132.43 | 27.22 | -1.96 | -1.25 |
| 57.43  | 63.89  | 7.13  | 31.52  | 41.11  | 36.26  | 5.65  | -1.76 | -1.3  |
| 42.63  | 46.6   | 4.69  | 13.54  | 26.21  | 19.54  | 7.13  | -2.38 | -1.44 |
| 18.83  | 14.69  | 4.5   | 18.12  | 12.32  | 15.05  | 4.48  | 1.02  | 0.47  |
| 51.94  | 44.53  | 8.56  | 32.18  | 26.83  | 29.41  | 4.5   | -1.51 | -0.98 |
| 26.9   | 32.85  | 7.77  | 21.67  | 18.84  | 20.12  | 2.73  | -1.63 | -0.96 |
| 1.23   | 3.65   | 3.21  | 24.91  | 14.5   | 19.84  | 5.69  | 5.44  | 1.79  |
| 14.25  | 18.32  | 6.02  | 17.91  | 23.92  | 20.82  | 4.81  | 1.14  | 0.6   |
| 2.27   | 3.67   | 3.61  | 26.25  | 10.84  | 18.05  | 8.91  | 4.92  | 0.75  |
| 9.11   | 7.55   | 3.55  | 2.75   | 10.69  | 5.97   | 4.91  | -1.27 | -0.24 |
| 4.2    | 2.06   | 2.49  | 1      | 1.22   | 1.12   | 0.32  | -1.84 | 0     |
| 7.09   | 4.12   | 3.26  | 19.14  | 30.18  | 23.55  | 8.21  | 5.72  | 1.73  |
| 28.74  | 29.42  | 6.21  | 119.43 | 39.42  | 79.49  | 41.38 | 2.7   | 0.38  |
| 478.34 | 445.08 | 34.49 | 209.9  | 263.06 | 237.75 | 28.78 | -1.87 | -1.49 |
| 3.22   | 3.11   | 4.66  | 2.86   | 2.67   | 2.77   | 4.19  | -1.12 | 0     |
| 49.85  | 48.1   | 6.78  | 16.44  | 34.62  | 24.93  | 9.88  | -1.93 | -1.09 |

|         |         |        |         |         |         |       |       |       |
|---------|---------|--------|---------|---------|---------|-------|-------|-------|
| 3068.04 | 2930.32 | 139.32 | 4224.51 | 4248.58 | 4235.33 | 55.51 | 1.45  | 1.34  |
| 51.72   | 50.32   | 4.85   | 54.79   | 42.3    | 48.48   | 7.75  | -1.04 | -0.78 |
| 86.96   | 68.71   | 19.78  | 13.27   | 22.33   | 17.8    | 7.46  | -3.86 | -1.69 |
| 5.15    | 7.05    | 3.18   | 15.48   | 8.2     | 12.51   | 6.33  | 1.77  | 0.28  |
| 99.88   | 97.77   | 9.11   | 48.51   | 70.85   | 58.18   | 15.28 | -1.68 | -1.13 |
| 65.4    | 57.25   | 8.35   | 38.68   | 28.13   | 32.78   | 6.94  | -1.75 | -1.16 |
| 103.38  | 108.61  | 21.42  | 204.89  | 210.54  | 207.24  | 9.01  | 1.91  | 1.43  |
| 39.19   | 37.41   | 4.77   | 28.83   | 50.71   | 39.75   | 11.37 | 1.06  | 0.55  |
| 6.63    | 6.2     | 1.88   | 33.36   | 11.9    | 22.34   | 11.33 | 3.6   | 0.58  |
| 45.43   | 62.08   | 17.16  | 36.76   | 49.1    | 42.78   | 6.79  | -1.45 | -0.76 |
| 13.27   | 14.95   | 4.13   | 26.31   | 32.37   | 29.38   | 5.1   | 1.97  | 1.19  |
| 10.99   | 8.49    | 3.18   | 25.94   | 9.39    | 17.6    | 8.62  | 2.07  | 0.39  |
| 6.56    | 4.63    | 3.03   | 4.02    | 2.53    | 3.22    | 1.95  | -1.44 | 0     |
| 48.99   | 47.14   | 4.89   | 30.29   | 37.44   | 34.12   | 5.14  | -1.38 | -1.03 |
| 16.69   | 13.26   | 5.49   | 34.05   | 37.46   | 36.09   | 2.68  | 2.72  | 1.59  |
| 5.32    | 7.69    | 5.66   | 6.29    | 45.01   | 25.42   | 19.71 | 3.31  | 0     |
| 59.58   | 52.76   | 7.6    | 27.22   | 54.51   | 40.82   | 13.73 | -1.29 | -0.77 |
| 60.08   | 59.57   | 9.27   | 170.14  | 120.58  | 145.27  | 26.73 | 2.44  | 1.6   |
| 155.21  | 135.45  | 20.75  | 41.06   | 40.13   | 40.69   | 4.27  | -3.33 | -2.39 |
| 5.54    | 5.46    | 2      | 22.96   | 22.91   | 22.93   | 3.1   | 4.2   | 2.45  |
| 197.73  | 171.6   | 27.07  | 52.82   | 91.65   | 70.72   | 22.5  | -2.43 | -1.44 |
| 10.09   | 12.83   | 4.18   | 42.34   | 23.44   | 32.92   | 10.75 | 2.57  | 1.07  |
| 28.6    | 35.62   | 8.17   | 28.4    | 20.39   | 24.63   | 4.75  | -1.45 | -0.84 |
| 31.48   | 22.26   | 9.22   | 22.44   | 36.27   | 29.14   | 8.07  | 1.31  | 0.59  |
| 29.6    | 33.89   | 5.37   | 20.94   | 25.65   | 22.75   | 3.36  | -1.49 | -1.03 |
| 45.87   | 37.46   | 8.43   | 20.67   | 15.22   | 17.69   | 4.58  | -2.12 | -1.19 |
| 174.08  | 203.71  | 30.37  | 24.79   | 29.78   | 27.44   | 4.88  | -7.42 | -5.07 |
| 44.72   | 44.44   | 2.52   | 9.54    | 38.33   | 24.04   | 14.4  | -1.85 | -0.92 |
| 28.47   | 26.61   | 4.75   | 42.82   | 26.5    | 35.39   | 10.15 | 1.33  | 0.67  |
| 44.32   | 39.59   | 5.34   | 28.12   | 21.43   | 24.55   | 5.49  | -1.61 | -1.08 |
| 40.46   | 43.28   | 4.49   | 37.7    | 21.32   | 30.15   | 10.32 | -1.44 | -0.88 |
| 29.49   | 26.33   | 3.74   | 8.93    | 10.27   | 9.74    | 3.76  | -2.7  | -1.54 |
| 30.85   | 36.03   | 5.7    | 23.97   | 14.49   | 19.22   | 5.96  | -1.87 | -1.12 |
| 26.45   | 27.09   | 3.05   | 33.76   | 37.01   | 34.86   | 3.86  | 1.29  | 0.99  |
| 4.97    | 32.78   | 28.76  | 10.83   | 27.34   | 19.09   | 8.9   | -1.72 | 0     |
| 42.09   | 43.08   | 1.99   | 52.71   | 30.69   | 40.86   | 12.9  | -1.05 | -0.69 |

|        |        |       |        |       |        |       |       |       |
|--------|--------|-------|--------|-------|--------|-------|-------|-------|
| 11.63  | 9.54   | 2.78  | 13.91  | 10.94 | 11.99  | 3.78  | 1.26  | 0.55  |
| 17.32  | 16.3   | 4.66  | 29.57  | 46.92 | 38.1   | 8.9   | 2.34  | 1.26  |
| 52.02  | 51.83  | 3.26  | 47.28  | 43.96 | 46     | 4.87  | -1.13 | -0.93 |
| 190.07 | 155.93 | 34.96 | 32.02  | 50.94 | 41.13  | 10.7  | -3.79 | -2.12 |
| 7.41   | 4.2    | 3.21  | 1.86   | 1     | 1.24   | 2.13  | -3.39 | 0     |
| 202.34 | 176.99 | 26.64 | 81.65  | 67.81 | 75.75  | 9.85  | -2.34 | -1.66 |
| 186.25 | 149.97 | 36.24 | 27.93  | 58.47 | 42.83  | 15.6  | -3.5  | -1.76 |
| 3.25   | 5.36   | 2.99  | 11.04  | 12.09 | 11.7   | 2.79  | 2.18  | 0.96  |
| 47.62  | 47.16  | 4.36  | 32.42  | 15.38 | 24.2   | 9.27  | -1.95 | -1.16 |
| 25.77  | 26.83  | 3.15  | 63.62  | 80.61 | 71.69  | 9.33  | 2.67  | 1.98  |
| 14.15  | 13.91  | 7.59  | 11.97  | 10.24 | 11.36  | 4.7   | -1.22 | -0.12 |
| 9.06   | 6.09   | 4.41  | 15.13  | 11.97 | 13.87  | 2.8   | 2.28  | 0.93  |
| 25.4   | 25.52  | 2.54  | 48.61  | 62.64 | 55.55  | 7.19  | 2.18  | 1.64  |
| 52.28  | 46.98  | 6.19  | 25.36  | 39.23 | 32.18  | 7.18  | -1.46 | -0.98 |
| 27.43  | 30.05  | 4.78  | 35.03  | 25.33 | 30.78  | 6.69  | 1.02  | 0.62  |
| 7.41   | 7.72   | 4.68  | 14.48  | 44.95 | 29.69  | 15.32 | 3.84  | 0.54  |
| 4.82   | 5.21   | 5.59  | 66.36  | 42.36 | 54.19  | 13.74 | 10.41 | 3.23  |
| 14.01  | 13.83  | 3.95  | 19.61  | 5.24  | 12.79  | 8.41  | -1.08 | -0.41 |
| 36.67  | 29.22  | 8.57  | 25.48  | 44.27 | 34.39  | 10.12 | 1.18  | 0.55  |
| 29.33  | 35.09  | 7.57  | 26.05  | 40.5  | 33.3   | 8.33  | -1.05 | -0.6  |
| 8.23   | 10.47  | 5.15  | 15.52  | 38.73 | 27.03  | 12.44 | 2.58  | 0.57  |
| 13.54  | 16.22  | 3.55  | 16.48  | 10.38 | 13.69  | 5.1   | -1.18 | -0.62 |
| 140.91 | 118.08 | 23.16 | 19.03  | 39.12 | 28.74  | 11.03 | -4.11 | -2.19 |
| 36.42  | 36.76  | 4.28  | 51.05  | 45.22 | 47.99  | 4.3   | 1.31  | 1.03  |
| 28.11  | 25.21  | 3.61  | 45.46  | 69.39 | 57.87  | 12.53 | 2.3   | 1.41  |
| 6.46   | 3.49   | 3.38  | 2.57   | 9.55  | 6.56   | 4.14  | 1.88  | 0     |
| 146.51 | 134.82 | 12.72 | 28.53  | 80.1  | 52.51  | 27.91 | -2.57 | -1.33 |
| 201    | 198.2  | 17.76 | 134.71 | 162   | 146.94 | 23.26 | -1.35 | -1.02 |

| upper bound | difference of | t statistic | P value  | filtered | DMSO A112 | DMSO B112 | baseline mea | baseline mea |
|-------------|---------------|-------------|----------|----------|-----------|-----------|--------------|--------------|
| -3.5        | -231.04       | -4.751      | 0.068345 | *        | 144       | 155.64    | 150.86       | 10.6         |
| -2.28       | -320.13       | -8.898      | 0.012531 | *        | 411.02    | 454.38    | 432.56       | 22.89        |
| 1.89        | 451.92        | 8.959       | 0.016172 | *        | 279.09    | 418.78    | 348.58       | 70.42        |
| -3.82       | -240.74       | -10.145     | 0.009894 | *        | 196.47    | 206.1     | 200.89       | 11.7         |
| -3.67       | -847.18       | -10.248     | 0.035108 | *        | 1431.11   | 1931.77   | 1680.55      | 250.85       |
| -2.86       | -66.34        | -3.901      | 0.098476 | *        | 382.96    | 420.79    | 402.02       | 20.68        |
| 2           | 902.79        | 10.265      | 0.014505 | *        | 1202.32   | 1032.23   | 1115.94      | 92.39        |
| 2.6         | 622.16        | 6.222       | 0.027839 | *        | 1583.6    | 1188      | 1384.84      | 202.03       |
| 3.01        | 462.88        | 4.337       | 0.049645 | *        | 1055.22   | 861.14    | 958.08       | 101.58       |
| 2.88        | 1234.28       | 7.433       | 0.044563 | *        | 2686.87   | 2066.14   | 2375.63      | 317.87       |
| 2.15        | 2436.84       | 5.434       | 0.067889 | *        | 1664.42   | 1714.92   | 1692.83      | 73.32        |
| 1.73        | 683.8         | 15.434      | 0.010516 | *        | 268.4     | 237.43    | 252.14       | 21.2         |
| -2.8        | -200.45       | -5.09       | 0.060312 | *        | 18.63     | 23.72     | 20.7         | 7.81         |
| -2.17       | -362.4        | -8.317      | 0.015516 | *        | 691.97    | 735.45    | 712.25       | 29.25        |
| -2.39       | -450.57       | -4.929      | 0.039565 | *        | 855.9     | 964.89    | 912.03       | 55.98        |
| -1.79       | -574.03       | -10.308     | 0.014401 | *        | 2397.42   | 2823.86   | 2606.43      | 218.68       |
| -3.68       | -153.8        | -4.885      | 0.044067 | *        | 126.56    | 125.9     | 126.16       | 9.4          |
| 4.21        | 92.94         | 3.857       | 0.071219 | *        | 480.09    | 406.15    | 442.96       | 40.73        |

|       |          |         |            |         |         |         |        |
|-------|----------|---------|------------|---------|---------|---------|--------|
| -5.77 | -874.35  | -10.309 | 0.027051 * | 16.49   | 12.46   | 14.51   | 4.22   |
| -2.04 | -127.92  | -6.029  | 0.035665 * | 369.43  | 398.42  | 382.06  | 17.07  |
| 3.3   | 25.33    | 3.594   | 0.089149 * | 19.74   | 17.14   | 18.58   | 4.44   |
| -3.19 | -2068.94 | -21.111 | 0.002819 * | 31.49   | 37.81   | 34.35   | 22.86  |
| -2.14 | -120.16  | -5.088  | 0.099041 * | 157.88  | 195.2   | 176.66  | 20.91  |
| -2.49 | -48.27   | -6      | 0.052831 * | 84.9    | 79.12   | 82.35   | 8.71   |
| 2.7   | 495.48   | 6.957   | 0.020073 * | 1185.82 | 1295.69 | 1237.17 | 61.92  |
| -2    | -1966.35 | -11.839 | 0.008645 * | 116.38  | 128     | 121.93  | 15.73  |
| -2.41 | -351.55  | -5.624  | 0.030264 * | 761.49  | 618.88  | 688.66  | 77.15  |
| -5.24 | -433.32  | -5.401  | 0.071352 * | 485.79  | 582.41  | 534.35  | 49.22  |
| -2.37 | -176.02  | -4.358  | 0.095967 * | 420.33  | 397.34  | 408.67  | 16.21  |
| 2.03  | 310.69   | 10.653  | 0.008887 * | 917.02  | 815.34  | 865.81  | 54.2   |
| -2.27 | -181.81  | -7.18   | 0.01904 *  | 338.89  | 369.01  | 354.46  | 20.42  |
| -2.62 | -1411.88 | -5.661  | 0.095857 * | 1823.93 | 1760.57 | 1789.87 | 53.05  |
| -2.11 | -372.21  | -6.197  | 0.064396 * | 110.44  | 121.88  | 115.74  | 8.51   |
| -1.88 | -312.24  | -9.599  | 0.015121 * | 599.2   | 565.49  | 582.82  | 26.74  |
| -4.76 | -166.91  | -6.053  | 0.034807 * | 6.26    | 6.54    | 6.41    | 5.92   |
| -3.86 | -350.75  | -6.003  | 0.061581 * | 118.86  | 94.07   | 106.35  | 19.17  |
| -3.76 | -504.24  | -8.68   | 0.013015 * | 141.09  | 119.9   | 131.22  | 27.7   |
| 1.9   | 444.76   | 21.416  | 0.003322 * | 59.11   | 75.7    | 66.2    | 12.37  |
| 2.03  | 200.21   | 9.71    | 0.014494 * | 324.35  | 306.55  | 314.77  | 22.47  |
| -3.13 | -151.09  | -6.116  | 0.042508 * | 33.81   | 34.38   | 34.09   | 6.68   |
| 36.49 | 21.97    | 6.744   | 0.021846 * | 7.69    | 30.57   | 19.48   | 11.63  |
| -2.2  | -128.5   | -11.627 | 0.007813 * | 53.44   | 71.75   | 61.99   | 12.03  |
| -1.96 | -632.27  | -10.394 | 0.013833 * | 767.79  | 760.41  | 764.63  | 21.96  |
| -3.48 | -293.29  | -4.218  | 0.062414 * | 859.84  | 878.66  | 870.31  | 20.86  |
| -2.58 | -72.06   | -6.027  | 0.026545 * | 20.58   | 13.41   | 17.14   | 7.24   |
| -3.28 | -171.6   | -8.751  | 0.012835 * | 28.08   | 51.02   | 39.35   | 11.76  |
| -4.6  | -117.29  | -3.251  | 0.083913 * | 907.15  | 1134.98 | 1020.2  | 114.79 |
| 4.01  | 32.99    | 3.782   | 0.064303 * | 72.79   | 67.53   | 70.27   | 5.68   |
| -2.82 | -415.05  | -7.958  | 0.015727 * | 1719.01 | 2107.74 | 1912.69 | 194.88 |
| -3.09 | -53.27   | -4.314  | 0.049759 * | 38.97   | 44.31   | 41.47   | 10.02  |
| -2.38 | -67.61   | -8.337  | 0.014822 * | 118.82  | 173.45  | 146.03  | 27.77  |
| -5.59 | -351.76  | -16.125 | 0.00395 *  | 299.87  | 337.38  | 318.47  | 21.65  |
| -6    | -386.07  | -17.67  | 0.003215 * | 295.05  | 303.45  | 298.23  | 10.06  |
| -2.65 | -262.25  | -7.249  | 0.021207 * | 325.72  | 341.68  | 332.53  | 13.09  |

|        |          |         |            |         |         |         |        |
|--------|----------|---------|------------|---------|---------|---------|--------|
| -15.58 | -95.72   | -4.519  | 0.075793 * | 144.82  | 131.86  | 137.73  | 11.77  |
| -4.56  | -1678.63 | -3.94   | 0.067205 * | 5726.18 | 6093.59 | 5906.61 | 199.03 |
| -2.53  | -160.98  | -12.686 | 0.010479 * | 163.56  | 158.9   | 161.11  | 10.5   |
| 2.35   | 205.19   | 8.773   | 0.038302 * | 237.3   | 189.9   | 212.2   | 27.07  |
| -2.89  | -110.91  | -4.524  | 0.045568 * | 107.97  | 112.56  | 110.14  | 7.82   |
| -1.97  | -3051.92 | -14.617 | 0.004663 * | 350.55  | 369.26  | 358.5   | 34.75  |
| -1.81  | -2356.03 | -10.717 | 0.015235 * | 368.05  | 392.86  | 381.85  | 36.85  |
| 3.33   | 33.01    | 4.552   | 0.061122 * | 112.46  | 95.28   | 104.36  | 10     |
| 11     | 45.43    | 6.918   | 0.026154 * | 4.22    | 4.56    | 4.46    | 2.61   |
| -3.09  | -387.1   | -9.278  | 0.029689 * | 718.15  | 791.04  | 751.97  | 42.42  |
| -2.49  | -84.59   | -5.619  | 0.053009 * | 34.34   | 21.82   | 29.34   | 10.57  |
| -2.49  | -1449.79 | -5.29   | 0.034227 * | 2634.42 | 3479.68 | 3057.44 | 422.83 |
| -2.63  | -93.46   | -5.621  | 0.030325 * | 576.19  | 681.8   | 627.86  | 54.53  |
| -2.41  | -214.6   | -9.965  | 0.011125 * | 15.17   | 22.95   | 18.72   | 8.76   |
| -10.44 | -459.45  | -6.398  | 0.050932 * | 84.71   | 107.52  | 95.88   | 13.93  |
| -13.92 | -35.66   | -5.394  | 0.034651 * | 31.02   | 45.34   | 37.19   | 9.01   |
| -2.4   | -512.68  | -7.665  | 0.046551 * | 261.61  | 309.71  | 285.74  | 28.44  |
| 2.37   | 57       | 4.833   | 0.058381 * | 4.34    | 4.92    | 4.64    | 5.56   |
| -2.36  | -741.33  | -5.7    | 0.037698 * | 2080.75 | 2277.54 | 2172.6  | 106.1  |
| -11.92 | -29.9    | -3.955  | 0.06416 *  | 18.37   | 20.09   | 18.96   | 3.9    |
| -7.72  | -96.45   | -7.337  | 0.028151 * | 12.17   | 9.18    | 10.58   | 4.65   |
| -3.27  | -137.02  | -5.846  | 0.050831 * | 25.69   | 32.62   | 28.12   | 6.68   |
| -3.36  | -93.11   | -5.256  | 0.067774 * | 327.87  | 330.21  | 329.16  | 10.48  |
| -4.66  | -118.22  | -4.936  | 0.094644 * | 22.49   | 25.95   | 23.96   | 5.28   |
| -3.57  | -241.33  | -6.381  | 0.026737 * | 96.95   | 109.57  | 103.31  | 8.4    |
| -2.1   | -122.73  | -6.36   | 0.049091 * | 327.12  | 393.78  | 359.96  | 34.17  |
| 4.82   | 27.78    | 3.173   | 0.09792 *  | 45.01   | 18.28   | 32.34   | 14.58  |
| 3.76   | 65.41    | 4.211   | 0.063149 * | 167.47  | 158.02  | 162.33  | 9.6    |
| -7.19  | -20.91   | -3.7    | 0.070005 * | 36.71   | 20.44   | 28.36   | 8.98   |
| -2.11  | -280.73  | -6.457  | 0.023179 * | 292.37  | 322.26  | 306.67  | 21.48  |
| 2.49   | 20.54    | 6.22    | 0.026024 * | 18.01   | 17.76   | 17.93   | 2.78   |
| 2.95   | 51.22    | 5.661   | 0.0328 *   | 76.02   | 62.48   | 68.71   | 8.37   |
| 10.96  | 21.67    | 3.067   | 0.092003 * | 6.31    | 11.14   | 8.84    | 3.76   |
| -4.31  | -28.34   | -4.796  | 0.049495 * | 42.07   | 53.74   | 47.84   | 7.05   |
| -2.21  | -48.94   | -5.693  | 0.029735 * | 18.23   | 4.31    | 10.99   | 7.63   |
| -7.55  | -231.23  | -5.572  | 0.081331 * | 21.37   | 13.12   | 16.82   | 6.91   |

|           |         |         |            |          |          |          |        |
|-----------|---------|---------|------------|----------|----------|----------|--------|
| 2.24      | 341.67  | 7.493   | 0.018865 * | 620.26   | 609.02   | 614.33   | 18.49  |
| -2.38     | -234.26 | -5.338  | 0.081254 * | 102.74   | 134      | 118.47   | 20.87  |
| -2.39     | -586.54 | -11.036 | 0.013659 * | 1342.88  | 1828.37  | 1585.85  | 243.03 |
| 2.03      | 1372.12 | 16.055  | 0.009752 * | 909.22   | 930.09   | 919.07   | 40.52  |
| -2.2      | -964.79 | -8.527  | 0.047659 * | 678.62   | 922.04   | 796.66   | 130.9  |
| 2         | 303.27  | 9.643   | 0.038684 * | 651.98   | 661.83   | 657.97   | 18.19  |
| 1.88      | 383.72  | 8.635   | 0.020849 * | 519.37   | 431.89   | 477.26   | 48.6   |
| -1.84     | -583.53 | -9.901  | 0.011263 * | 890.43   | 1025.44  | 958.41   | 70.55  |
| -2.86     | -90.35  | -5.483  | 0.035635 * | 158.36   | 150.52   | 154.38   | 8.6    |
| 2.51      | 357.23  | 5.053   | 0.036999 * | 672.15   | 1312.28  | 991.05   | 320.76 |
| -2.07     | -441.47 | -12.187 | 0.008133 * | 762.64   | 802.23   | 781.88   | 27.14  |
| -2.8      | -289.7  | -7.801  | 0.016146 * | 299.92   | 381.84   | 340.54   | 42.36  |
| 3.12      | 157.47  | 5.393   | 0.067833 * | 1013.4   | 924.95   | 970.26   | 48.95  |
| -2.43     | -787.47 | -6.786  | 0.023539 * | 1921.5   | 1688.22  | 1803.7   | 121.65 |
| -3.1      | -148.69 | -9.15   | 0.014141 * | 14.59    | 22.13    | 18.92    | 7.7    |
| -4.01     | -348.82 | -16.179 | 0.004175 * | 20       | 21.31    | 20.53    | 6.19   |
| -5.94     | -162.62 | -4.181  | 0.067358 * | 11.93    | 20.86    | 16.62    | 7.26   |
| -6.22     | -462.23 | -20.255 | 0.00267 *  | 22.95    | 15.57    | 19.4     | 12.61  |
| -3.82     | -65.12  | -3.732  | 0.064875 * | 273.29   | 307.75   | 292.99   | 20.45  |
| -43.61    | -353.95 | -12.731 | 0.022964 * | 850.65   | 896.47   | 872.37   | 25.14  |
| -2.3      | -211.57 | -8.078  | 0.02752 *  | 8.75     | 9.38     | 9.06     | 6.32   |
| -10.42    | -2598.2 | -4.541  | 0.076664 * | 12990.22 | 13194.96 | 13088.63 | 183.47 |
| -26.52    | -25.99  | -4.961  | 0.055882 * | 9.54     | 15.61    | 12.32    | 4.66   |
| -2.51     | -47.31  | -6.282  | 0.050348 * | 24.43    | 18.61    | 21.53    | 4.34   |
| 2.03      | 161.4   | 6.943   | 0.023208 * | 43.68    | 37.79    | 41.68    | 7.86   |
| 2.39      | 51.75   | 4.907   | 0.041535 * | 57.26    | 61.43    | 59.68    | 5.12   |
| -1.92     | -73.87  | -9.277  | 0.011555 * | 6.61     | 14.24    | 10.23    | 5.12   |
| -5.84     | -36.58  | -6.962  | 0.021586 * | 45.54    | 75.33    | 59.84    | 15.69  |
| -2.71     | -56.85  | -5.408  | 0.066267 * | 60.02    | 59.57    | 59.84    | 4.94   |
| 100000000 | 28.99   | 5.866   | 0.02892 *  | 12.06    | 48.54    | 30.28    | 18.32  |
| -2.82     | -65.57  | -5.495  | 0.033111 * | 187.71   | 188.79   | 188.22   | 8.35   |
| 2.12      | 278.22  | 12.038  | 0.012293 * | 616.11   | 584.3    | 600.71   | 22.41  |
| 16.34     | 24.81   | 4.725   | 0.056318 * | 18.91    | 21.44    | 19.95    | 3.86   |
| 2.18      | 357.92  | 11.533  | 0.038405 * | 159.9    | 138.2    | 149.99   | 13.14  |
| 2.09      | 1274.44 | 5.541   | 0.048709 * | 1581.06  | 1646.39  | 1611.9   | 55.12  |
| -11.07    | -28.65  | -4.009  | 0.057068 * | 21.76    | 29.8     | 25.51    | 5.07   |



|            |          |         |            |         |         |         |        |
|------------|----------|---------|------------|---------|---------|---------|--------|
| -3.71      | -1507.5  | -9.769  | 0.010317 * | 31.23   | 36.62   | 33.93   | 11.33  |
| -2.97      | -1411.02 | -20.417 | 0.013137 * | 17.6    | 26.56   | 21.83   | 8.02   |
| -2.27      | -708.59  | -5.266  | 0.040647 * | 1961.77 | 1729.67 | 1843.03 | 122.96 |
| -1.99      | -1654.16 | -7.932  | 0.022469 * | 6721.7  | 6733.48 | 6724.93 | 96.14  |
| -2.23      | -131.1   | -5.123  | 0.046831 * | 186.15  | 175.01  | 181.37  | 10.5   |
| 2.46       | 362.03   | 11.008  | 0.017899 * | 420     | 385.09  | 403     | 20.27  |
| 1.87       | 288.83   | 10.621  | 0.008916 * | 443.38  | 481.72  | 462.04  | 26.45  |
| 3.49       | 511.6    | 3.67    | 0.098678 * | 1269.21 | 1343.75 | 1300.75 | 45.15  |
| 2.37       | 778.74   | 6.204   | 0.082264 * | 1919.09 | 1934.05 | 1924.43 | 18.81  |
| -3.04      | -183.75  | -4.316  | 0.049893 * | 129.55  | 156.93  | 143.22  | 16.27  |
| 2.25       | 934.14   | 7.9     | 0.017286 * | 614.77  | 540.76  | 578.33  | 57.01  |
| -3.98      | -174.73  | -5.893  | 0.044967 * | 829.1   | 1142.06 | 984.69  | 157.13 |
| -1.81      | -267.27  | -16.588 | 0.007132 * | 297.81  | 362.36  | 329.55  | 32.79  |
| -1.96      | -265.05  | -7.689  | 0.018032 * | 332.15  | 357.6   | 345.51  | 16.09  |
| 1.96       | 180.75   | 6.934   | 0.037468 * | 593.68  | 705.65  | 648.36  | 58.02  |
| -2.03      | -342.29  | -13.079 | 0.007572 * | 42.34   | 42.41   | 42.37   | 7.27   |
| 1.76       | 291.17   | 13.473  | 0.005572 * | 223.38  | 226.41  | 224.77  | 8.69   |
| -3.03      | -233.05  | -4.58   | 0.054273 * | 16.88   | 25.73   | 20.2    | 7.97   |
| -9.89      | -99.28   | -7.292  | 0.0196 *   | 3.47    | 4.79    | 4.01    | 2.76   |
| -10.33     | -446.76  | -9.354  | 0.022186 * | 1       | 1       | 1       | 1.16   |
| -2.31      | -147.29  | -5.907  | 0.032838 * | 223.25  | 232.56  | 229.02  | 11.41  |
| -14.58     | -211.11  | -9.241  | 0.052109 * | 23.14   | 35.61   | 28.98   | 8.53   |
| -1.95      | -105.84  | -6.671  | 0.037372 * | 68.11   | 77.84   | 73.68   | 10.13  |
| 2.42       | 36.47    | 5.499   | 0.057958 * | 109.09  | 107.92  | 108.43  | 4.24   |
| -2.71      | -34.75   | -7.375  | 0.017904 * | 32.6    | 24.8    | 28.23   | 6.11   |
| -100000000 | -21.63   | -4.579  | 0.045386 * | 11.62   | 27      | 19.4    | 7.96   |
| -2.82      | -41.72   | -4.144  | 0.064989 * | 161.22  | 169.05  | 165.09  | 9.84   |
| 2.81       | 189.35   | 5.911   | 0.056858 * | 375.06  | 401.38  | 386.25  | 17     |
| -5.72      | -349.62  | -4.229  | 0.054537 * | 2417.09 | 2673.46 | 2540.02 | 134.81 |
| 10.03      | 36.49    | 3.601   | 0.090555 * | 2.22    | 4.89    | 3.45    | 2.57   |
| 4.53       | 411.37   | 6.973   | 0.041226 * | 1054.03 | 998.61  | 1027.16 | 32.69  |
| -15.5      | -22.07   | -4.455  | 0.048866 * | 16.71   | 12.53   | 14.98   | 4.5    |
| 2.32       | 46.33    | 5.477   | 0.041032 * | 52.75   | 63.98   | 58.87   | 8.62   |
| 2.71       | 25.75    | 4.036   | 0.063912 * | 37.29   | 50.11   | 44.47   | 7.78   |
| 10.16      | 21.27    | 3.2     | 0.098655 * | 21.45   | 17.54   | 19.49   | 3.74   |
| 2.05       | 957.98   | 10.103  | 0.010042 * | 1144.65 | 1056.77 | 1099.22 | 52.52  |

|        |         |         |            |         |         |         |       |
|--------|---------|---------|------------|---------|---------|---------|-------|
| -5.5   | -29.9   | -6.362  | 0.055563 * | 6.79    | 41.05   | 24.32   | 17.44 |
| -2.11  | -304.43 | -6.327  | 0.040154 * | 627.74  | 534.11  | 579.47  | 52.02 |
| 3.25   | 66.17   | 7.219   | 0.036838 * | 39.58   | 18.47   | 28.54   | 11.79 |
| -2.63  | -61.27  | -4.922  | 0.043673 * | 23.31   | 36.05   | 29.46   | 7.16  |
| -2.45  | -124.54 | -8.533  | 0.013938 * | 155.5   | 168.78  | 162.11  | 7.79  |
| 4.67   | 20.24   | 3.727   | 0.065107 * | 27.86   | 39.23   | 33.48   | 6.42  |
| -1.91  | -377.76 | -11.396 | 0.009335 * | 474.81  | 505.49  | 487.81  | 18.05 |
| -2.1   | -1679.9 | -7.059  | 0.069967 * | 4653.05 | 4597.43 | 4632.81 | 95.49 |
| -2.56  | -68.12  | -4.559  | 0.053216 * | 48.57   | 41.25   | 45.29   | 7.22  |
| -3.29  | -131.45 | -4.85   | 0.064487 * | 55.38   | 129.27  | 93.18   | 38.21 |
| -2.15  | -265.51 | -7.253  | 0.021898 * | 1378.88 | 1522.22 | 1446.02 | 80.96 |
| -2.22  | -239.65 | -9.408  | 0.012849 * | 372.53  | 442.91  | 406.68  | 37.43 |
| 3.64   | 75.45   | 5.944   | 0.027332 * | 43.1    | 46.83   | 44.81   | 7.84  |
| -2.88  | -43.69  | -3.882  | 0.068436 * | 196.07  | 232.59  | 213.65  | 19.99 |
| 1.76   | 393.17  | 15.813  | 0.003987 * | 650.58  | 517.07  | 583.31  | 68.26 |
| -4.37  | -263.21 | -6.621  | 0.027332 * | 32.18   | 62.59   | 47.35   | 16.56 |
| -1.98  | -295.07 | -6.504  | 0.067151 * | 559.76  | 537.71  | 549.36  | 16.89 |
| -2.49  | -176.18 | -6.23   | 0.081537 * | 2.77    | 1       | 1.88    | 1.95  |
| -4.08  | -68.83  | -4.504  | 0.062805 * | 117.16  | 116.52  | 116.94  | 10.21 |
| -11.64 | -55.54  | -4.477  | 0.046456 * | 3.11    | 20.12   | 11.45   | 8.7   |
| -5.97  | -194.81 | -3.299  | 0.081999 * | 71.84   | 68.34   | 70.3    | 10.01 |
| -3.52  | -45.89  | -4.552  | 0.045088 * | 162.05  | 168.22  | 164.82  | 7.19  |
| 1.84   | 988.6   | 12.681  | 0.009484 * | 1082.62 | 1145.34 | 1113.65 | 41.65 |
| -1.98  | -270.77 | -11.183 | 0.010378 * | 967.36  | 1122.94 | 1043.79 | 79.71 |
| -2.45  | -121.3  | -6.411  | 0.044394 * | 59.5    | 39.43   | 48.92   | 12.38 |
| -2.46  | -654.89 | -5.507  | 0.050628 * | 532.29  | 663.81  | 597.43  | 67.36 |
| -2.6   | -263.9  | -9.754  | 0.010511 * | 185.81  | 204.86  | 194.74  | 13.64 |
| -2.02  | -262.67 | -8.702  | 0.023273 * | 73.7    | 53.47   | 63.4    | 13.88 |
| 5.87   | 122.74  | 5.757   | 0.031246 * | 629.76  | 565.89  | 597.65  | 35.55 |
| -2.14  | -125.57 | -11.042 | 0.02176 *  | 190.69  | 223.34  | 207.45  | 16.95 |
| -36.06 | -26.72  | -3.34   | 0.09379 *  | 15.47   | 8.65    | 12.59   | 4.3   |
| 2.11   | 146.91  | 10.285  | 0.010266 * | 3.29    | 3.65    | 3.45    | 2.47  |
| -2.64  | -148.8  | -6.605  | 0.024293 * | 69.46   | 83.81   | 77.33   | 8.76  |
| -3.52  | -98.96  | -4.839  | 0.071731 * | 15.41   | 10.05   | 12.09   | 5.63  |
| -3.26  | -261.47 | -11.96  | 0.006924 * | 851.1   | 862.31  | 855.56  | 14.43 |
| 1.97   | 127.37  | 9.325   | 0.012105 * | 90.24   | 71.75   | 80.58   | 12.65 |

|       |         |        |            |         |         |         |       |
|-------|---------|--------|------------|---------|---------|---------|-------|
| -4.26 | -114.78 | -6.693 | 0.059388 * | 6.13    | 1       | 3       | 3.55  |
| -4.08 | -58.07  | -5.288 | 0.044728 * | 20.22   | 8.45    | 14.23   | 7.3   |
| -4.12 | -83.35  | -3.777 | 0.086526 * | 512.86  | 697.22  | 603.58  | 93.53 |
| -8.42 | -94.7   | -3.28  | 0.086587 * | 25.8    | 23.47   | 24.5    | 5.7   |
| -4.51 | -41.5   | -3.5   | 0.093164 * | 91.71   | 112.16  | 101.77  | 12.28 |
| 3.02  | 38.26   | 5.199  | 0.051093 * | 59.47   | 58.84   | 59.15   | 4.96  |
| -3.65 | -225.37 | -5.355 | 0.034244 * | 261.56  | 281.74  | 272.14  | 12.76 |
| -6.59 | -190.96 | -5.125 | 0.073974 * | 9.21    | 7.57    | 8.35    | 1.82  |
| 2.88  | 201.13  | 6.617  | 0.068009 * | 3003.23 | 2867.65 | 2937.57 | 81.03 |
| 2.69  | 67.65   | 6.473  | 0.036553 * | 74.25   | 54.51   | 64.28   | 12.21 |
| 3.06  | 102.97  | 9      | 0.024202 * | 91.12   | 62.6    | 76.82   | 15.18 |
| -4.88 | -150.07 | -3.626 | 0.075816 * | 197.29  | 211.62  | 205.37  | 9.69  |
| 2.07  | 300.64  | 6.701  | 0.034607 * | 85.74   | 77.84   | 81.94   | 11.68 |
| -2.42 | -79.6   | -6.519 | 0.038379 * | 35.64   | 42.66   | 39.08   | 6.07  |
| -3.38 | -57.17  | -7.429 | 0.019813 * | 30.79   | 39.86   | 35.63   | 6.51  |
| -4.53 | -76.04  | -5.433 | 0.042751 * | 200.08  | 254.76  | 227.01  | 28.05 |
| -2.71 | -85.06  | -4.558 | 0.045038 * | 96.42   | 115.98  | 105.78  | 12.32 |
| -2.26 | -72.49  | -6.514 | 0.029778 * | 327.32  | 353.17  | 341.18  | 14.32 |
| -3.33 | -361.06 | -4.625 | 0.091327 * | 839.18  | 968.61  | 904.98  | 68.48 |
| -3.87 | -55.61  | -5.875 | 0.036261 * | 86.07   | 79.47   | 83.54   | 6.39  |
| -2.75 | -116.26 | -5.19  | 0.085284 * | 440.29  | 470.4   | 455.14  | 16.11 |
| -5.39 | -43.78  | -5.653 | 0.031003 * | 21.71   | 34.85   | 28      | 8.22  |
| -2.35 | -66.01  | -6.102 | 0.026896 * | 255.39  | 259.87  | 257.1   | 8.13  |
| -2.14 | -110.61 | -6.242 | 0.025564 * | 23.4    | 39.27   | 30.19   | 9.71  |
| -6.78 | -4.65   | -0.266 | 0.82923    | 99.88   | 79.55   | 89.26   | 11.57 |
| -2.05 | -88.52  | -0.412 | 0.746053   | 939.79  | 1059.51 | 998.24  | 63.05 |
| -3.44 | -31.85  | -2.348 | 0.205509   | 407.11  | 408.78  | 407.74  | 7.26  |
| -5.73 | -10.28  | -1.055 | 0.444766   | 24.74   | 24.67   | 24.7    | 3.83  |
| -1.39 | -65.24  | -1.401 | 0.30655    | 274.81  | 305.59  | 290.97  | 17.21 |
| -3.58 | -113.73 | -2.112 | 0.250953   | 387.28  | 376.42  | 380.71  | 14.45 |
| -5.16 | -153.33 | -2.137 | 0.175344   | 601.16  | 612.26  | 606.68  | 18.58 |
| -2.34 | -192.66 | -2.151 | 0.253318   | 2453.13 | 2466.65 | 2461.35 | 50.57 |
| -2.66 | -12.83  | -0.781 | 0.517886   | 199.23  | 219.81  | 209.26  | 13.16 |
| 1.26  | 251.69  | 2.584  | 0.185492   | 17.4    | 19.3    | 18.36   | 6.59  |
| -1.55 | -117.15 | -1.539 | 0.35306    | 500.37  | 477.36  | 490.61  | 18.42 |
| 3.44  | 5.55    | 1.015  | 0.446704   | 130.41  | 141.7   | 135.97  | 6.31  |

|            |       |         |          |          |         |         |         |        |
|------------|-------|---------|----------|----------|---------|---------|---------|--------|
|            | -1.19 | -24.37  | -0.884   | 0.482203 | 504.53  | 683.44  | 593.44  | 90.18  |
|            | -2.62 | -13.59  | -1.018   | 0.445612 | 8.72    | 15.11   | 11.13   | 5.63   |
|            | -2.2  | -8.92   | -1.965   | 0.190184 | 19.36   | 14.84   | 16.49   | 4.4    |
| -100000000 | -7.84 | -0.79   | 0.545537 | 419.05   | 478.33  | 447.41  | 33.05   |        |
|            | 8.91  | 1.91    | 0.296    | 0.795026 | 36.39   | 36.5    | 36.43   | 1.6    |
| -100000000 | -0.37 | -0.027  | 0.981148 | 945.09   | 947.07  | 945.78  | 27.51   |        |
|            | 1.48  | 402.84  | 4.906    | 0.049633 | 692.29  | 835.57  | 764.01  | 74.13  |
|            | -1.26 | -266.58 | -2.107   | 0.171168 | 823.33  | 1034.34 | 928.43  | 108.46 |
|            | 1.73  | 430.58  | 2.256    | 0.152843 | 583.75  | 608.72  | 600.16  | 24.22  |
|            | -8.18 | -10.99  | -0.985   | 0.429468 | 8.73    | 13.29   | 10.67   | 3.29   |
| -15.92     | -8.07 | -0.559  | 0.639312 | 87.05    | 102.28  | 94.27   | 11.26   |        |
|            | 1.87  | 11.61   | 1.255    | 0.336789 | 189.43  | 190.41  | 189.79  | 8.01   |
|            | -1.48 | -78.95  | -3.293   | 0.121141 | 112.87  | 97.7    | 107.08  | 10.99  |
|            | -4.52 | -1.37   | -0.144   | 0.89971  | 29.58   | 28.22   | 28.77   | 3.19   |
|            | 3.32  | 6.33    | 0.61     | 0.609154 | 16.55   | 22.23   | 19.34   | 4.12   |
|            | -1.07 | -275.72 | -0.753   | 0.54296  | 8543.35 | 8251.6  | 8404.87 | 243.7  |
|            | -1.63 | -225.24 | -3.603   | 0.071414 | 1031.71 | 1125.5  | 1076.71 | 52.3   |
|            | 2.13  | 8.01    | 1.142    | 0.375157 | 36.65   | 45.03   | 40.43   | 6.21   |
|            | -4.56 | -107.64 | -1.696   | 0.242757 | 769.6   | 869.48  | 816.97  | 54.26  |
| 100000000  | 9.5   | 1.193   | 0.408951 | 28.95    | 38.46   | 33.82   | 5.09    |        |
|            | 3.17  | 4.16    | 0.533    | 0.649412 | 72.57   | 67.34   | 70.27   | 4.26   |
|            | 1.67  | 11.85   | 1.268    | 0.332556 | 80.51   | 83.04   | 82.17   | 6.63   |
|            | 2.83  | 494.09  | 2.822    | 0.211961 | 826.32  | 999.45  | 909.94  | 89.76  |
| 100000000  | 21.39 | 1.041   | 0.437361 | 1        | 3.77    | 1.78    | 2.96    |        |
|            | -1.28 | -93.77  | -3.12    | 0.118054 | 1401.18 | 1403.43 | 1402.1  | 21.75  |
|            | -1.29 | -484.42 | -1.277   | 0.332484 | 498.7   | 536.94  | 518.35  | 37.42  |
|            | -1.3  | -518.79 | -1.065   | 0.437684 | 581.31  | 621.71  | 598.08  | 44.93  |
|            | -1.42 | -55.8   | -3.039   | 0.093589 | 127.45  | 140.42  | 133.96  | 13.23  |
|            | -4.32 | -99.74  | -1.874   | 0.210069 | 389.11  | 355.82  | 372.98  | 19.89  |
|            | -7.64 | -57.52  | -1.895   | 0.198804 | 389.89  | 419.21  | 403.12  | 17.65  |
|            | 1.81  | 105.11  | 1.271    | 0.347598 | 788.32  | 796.92  | 793.22  | 22.52  |
| 100000000  | 3.39  | 0.357   | 0.770878 | 254.86   | 204.44  | 229.32  | 26.73   |        |
|            | -1.27 | -0.37   | -0.044   | 0.968998 | 48.15   | 41.61   | 45.74   | 6.42   |
|            | -2    | -87.86  | -2.924   | 0.110493 | 70.42   | 66.99   | 68.46   | 5.98   |
|            | -1.8  | -29.69  | -1.86    | 0.250735 | 108.47  | 106.38  | 107.34  | 5.23   |
|            | 2.22  | 28.92   | 2.199    | 0.159172 | 33      | 37.66   | 35.71   | 5.03   |

|            |         |          |          |          |         |         |         |        |
|------------|---------|----------|----------|----------|---------|---------|---------|--------|
|            | -3.66   | -25.58   | -3.029   | 0.103669 | 51.03   | 52.66   | 51.76   | 4.93   |
|            | 2.33    | 380.24   | 5.337    | 0.084828 | 512.74  | 434.83  | 475.15  | 43.53  |
|            | 10.7    | 4.34     | 0.902    | 0.517348 | 36.44   | 38.5    | 37.33   | 4.15   |
|            | -1.77   | -2652.34 | -7.554   | 0.057766 | 44.16   | 52.13   | 48.18   | 6.91   |
| 100000000  | 18.99   | 1.627    | 0.333632 | 74.97    | 62.32   | 68.27   | 68.27   | 7.4    |
|            | -1.59   | -2116.93 | -7.574   | 0.030052 | 46.47   | 44.79   | 45.78   | 6.45   |
|            | -2.22   | -4.21    | -0.705   | 0.554832 | 21.5    | 23.23   | 22.41   | 4.06   |
|            | -1.85   | -29.39   | -1.929   | 0.19998  | 368.64  | 412.33  | 389.09  | 24     |
|            | -4.72   | -10.05   | -2.094   | 0.178504 | 9.03    | 5.93    | 7.72    | 3.48   |
|            | -2.35   | -42.94   | -3.827   | 0.062303 | 59.15   | 46.59   | 52.47   | 8.82   |
|            | -3.38   | -13.65   | -1.171   | 0.395229 | 41.27   | 42.47   | 41.85   | 4.59   |
| 100000000  | 6.3     | 0.491    | 0.672988 | 141.72   | 135.09  | 138.56  | 138.56  | 8.58   |
| -100000000 | -6.66   | -1.748   | 0.23053  | 51.71    | 40.55   | 46.07   | 46.07   | 6.16   |
|            | -15.45  | -1409.5  | -4.892   | 0.127639 | 1918.59 | 1948.5  | 1929.42 | 37.58  |
| 100000000  | 2.15    | 0.193    | 0.865324 | 95.98    | 89.12   | 92.78   | 92.78   | 8.92   |
|            | 3.88    | 399.23   | 3.449    | 0.144281 | 168.3   | 164.08  | 166.06  | 13.67  |
|            | -1.9    | -244.64  | -0.595   | 0.651128 | 2106.13 | 2228.24 | 2160.51 | 78.73  |
|            | -2.03   | -14.46   | -1.165   | 0.374242 | 32.89   | 21.06   | 26.81   | 7.41   |
|            | 2.84    | 97.44    | 2.43     | 0.23786  | 55.94   | 37.49   | 46.47   | 11.33  |
|            | -4.27   | -98.05   | -3.355   | 0.110451 | 143.32  | 136.29  | 139.41  | 8.67   |
|            | 4.31    | 474.07   | 3.182    | 0.159111 | 2491.47 | 2078.79 | 2286.54 | 222.5  |
|            | -1.41   | -85.82   | -1.137   | 0.450933 | 48.49   | 47.99   | 48.17   | 4.33   |
|            | -1.47   | -4.29    | -0.68    | 0.572086 | 9.6     | 32.33   | 21.44   | 11.98  |
|            | -1.62   | -6.71    | -0.888   | 0.475428 | 36.68   | 41.24   | 38.81   | 5.22   |
| -100000000 | -293.66 | -3.835   | 0.111571 | 829.69   | 1572.54 | 1200.58 | 1200.58 | 371.46 |
|            | 1.9     | 195.13   | 2.087    | 0.278813 | 444.19  | 417.59  | 433.06  | 21.86  |
|            | -1.84   | -54.42   | -4.125   | 0.082973 | 153.88  | 169.3   | 161.18  | 8.82   |
|            | -2.32   | -19.61   | -2.374   | 0.17194  | 41.64   | 46.78   | 43.92   | 3.65   |
|            | -2.58   | -50.12   | -3.606   | 0.113403 | 18.96   | 15.44   | 17.21   | 5.4    |
|            | 4.61    | 15.61    | 3.584    | 0.099864 | 12.25   | 22.75   | 17.31   | 5.52   |
|            | -1.52   | -1.27    | -0.14    | 0.901392 | 14.73   | 13.22   | 14.13   | 3.92   |
|            | -6.84   | -11.85   | -0.507   | 0.663437 | 198.36  | 217.79  | 208.94  | 12.27  |
|            | -6.27   | -6.14    | -0.89    | 0.500271 | 32.57   | 33.68   | 33.19   | 3.02   |
|            | -3.85   | -279.04  | -4.321   | 0.112024 | 171.96  | 180.4   | 175.41  | 14.7   |
|            | -7.68   | -45.63   | -2.861   | 0.114838 | 161.97  | 253.4   | 207.02  | 46.52  |
|            | 3.34    | 10.4     | 0.788    | 0.521346 | 238.79  | 207.98  | 224.17  | 18.01  |

|            |         |        |          |         |        |         |        |
|------------|---------|--------|----------|---------|--------|---------|--------|
| -11.84     | -18.92  | -1.959 | 0.204347 | 21.42   | 23.18  | 22.41   | 2.12   |
| -5.17      | -144.08 | -3.723 | 0.103351 | 1597.11 | 1351.8 | 1474.83 | 126.61 |
| -100000000 | -26.13  | -2.182 | 0.241486 | 32.51   | 20.09  | 26.19   | 6.62   |
| -5.11      | -39.61  | -2.796 | 0.148441 | 167.91  | 147.26 | 158.22  | 12.97  |
| -4.28      | -13.74  | -1.284 | 0.32792  | 461.67  | 448.24 | 455.88  | 13.48  |
| -3.88      | -24.9   | -3.107 | 0.093625 | 13.28   | 8.56   | 10.75   | 3.08   |
| 2.05       | 8.32    | 1.293  | 0.374707 | 33.68   | 29.79  | 31.32   | 3.86   |
| -100000000 | -14.1   | -1.063 | 0.432931 | 34.43   | 32.64  | 33.5    | 3.58   |
| -4.52      | -12.47  | -1.528 | 0.284056 | 18.63   | 14.1   | 16.12   | 3.59   |
| -3.12      | -53.59  | -3.637 | 0.107301 | 17.41   | 5.41   | 11.64   | 7.77   |
| -3.37      | -137.48 | -3.119 | 0.090509 | 63.62   | 68.48  | 65.68   | 7.89   |
| -4.37      | -56.2   | -4.279 | 0.109887 | 32.9    | 35.06  | 33.88   | 5.55   |
| -1.35      | -8.78   | -0.471 | 0.709299 | 93.96   | 118.54 | 106.42  | 12.42  |
| 100000000  | 0.42    | 0.05   | 0.964861 | 59.14   | 60.24  | 59.69   | 5.18   |
| -1.81      | -1.82   | -0.15  | 0.902965 | 44.14   | 40.33  | 42.74   | 3.86   |
| -4.86      | -118.84 | -2.745 | 0.111117 | 80.78   | 62.42  | 71.32   | 9.94   |
| -2.32      | -30.3   | -2.957 | 0.11209  | 15.61   | 11.11  | 13.55   | 5.3    |
| 7.7        | 22.26   | 2.433  | 0.211509 | 23.75   | 15.45  | 19.55   | 5.35   |
| 8.01       | 104.87  | 2.219  | 0.26268  | 308.11  | 370.99 | 339.49  | 31.99  |
| 6.31       | 13.9    | 2.677  | 0.120588 | 14.59   | 19.81  | 17.3    | 2.95   |
| -3.17      | -126.67 | -2.398 | 0.165583 | 110.46  | 113.72 | 112.08  | 7.34   |
| -2.47      | -27.63  | -3.037 | 0.09938  | 75.12   | 77.08  | 75.91   | 3.44   |
| -6.02      | -27.06  | -3.17  | 0.10438  | 25.02   | 21.82  | 23.12   | 3.55   |
| 2.28       | 0.36    | 0.057  | 0.95999  | 6.47    | 12.68  | 9.96    | 3.83   |
| -2.26      | -15.12  | -1.564 | 0.295269 | 12.97   | 16.09  | 14.72   | 2.48   |
| -2.47      | -12.73  | -1.547 | 0.328711 | 27.98   | 29.27  | 28.88   | 3.04   |
| 100000000  | 16.19   | 2.479  | 0.163894 | 29.65   | 6.47   | 18.15   | 11.88  |
| 2.61       | 2.5     | 0.324  | 0.777742 | 46.33   | 48.26  | 47.38   | 6.18   |
| 100000000  | 14.38   | 1.496  | 0.329664 | 10.17   | 14.19  | 12.03   | 3.63   |
| -100000000 | -1.58   | -0.261 | 0.820532 | 12.06   | 12.91  | 12.56   | 3.97   |
| -6.64      | -0.94   | -0.373 | 0.771013 | 11.96   | 5.42   | 8.42    | 4.49   |
| 100000000  | 19.43   | 2.199  | 0.222195 | 13.09   | 16.97  | 14.67   | 3.31   |
| 5.76       | 50.07   | 1.197  | 0.436503 | 151.05  | 203.18 | 176.82  | 26.89  |
| -2.41      | -207.33 | -4.616 | 0.046557 | 76.26   | 84.09  | 80.6    | 8.46   |
| -100000000 | -0.33   | -0.053 | 0.96249  | 28.93   | 37.73  | 32.87   | 6.07   |
| -5.62      | -23.17  | -1.933 | 0.209106 | 33.66   | 28.87  | 31.41   | 5.32   |

|           |         |        |          |         |        |        |        |
|-----------|---------|--------|----------|---------|--------|--------|--------|
| 1.57      | 1305.02 | 8.702  | 0.040613 | 1045.76 | 817.2  | 928.46 | 137.29 |
| -1.45     | -1.85   | -0.202 | 0.861623 | 24.25   | 20.64  | 22.66  | 3.2    |
| -13.04    | -50.92  | -2.408 | 0.204462 | 140.89  | 131.61 | 136.61 | 8.72   |
| 7.61      | 5.46    | 0.77   | 0.545312 | 9.45    | 3.49   | 6.18   | 4.73   |
| -3        | -39.59  | -2.225 | 0.184018 | 143.88  | 161.61 | 153.84 | 11.07  |
| -2.81     | -24.46  | -2.254 | 0.157199 | 71.68   | 66.18  | 68.12  | 6.46   |
| 2.84      | 98.62   | 4.244  | 0.09782  | 89.82   | 70.71  | 80.45  | 12.04  |
| 1.67      | 2.34    | 0.19   | 0.874242 | 18.17   | 12.41  | 15.57  | 4.61   |
| 9         | 16.14   | 1.405  | 0.384968 | 1.21    | 14.28  | 7.62   | 6.68   |
| -2.35     | -19.3   | -1.046 | 0.451279 | 51.41   | 52.11  | 51.8   | 3.67   |
| 3.77      | 14.43   | 2.2    | 0.164285 | 8.01    | 22.97  | 14.82  | 8.69   |
| 6.3       | 9.11    | 0.991  | 0.473247 | 20.05   | 16.24  | 18.07  | 2.57   |
| -393.8    | -1.41   | -0.391 | 0.738957 | 41.55   | 35.66  | 39.46  | 4.3    |
| -1.91     | -13.02  | -1.836 | 0.20801  | 50.99   | 60.72  | 56.02  | 6.32   |
| 8.57      | 22.83   | 3.735  | 0.103494 | 40.12   | 30.02  | 34.92  | 6.11   |
| 100000000 | 17.74   | 0.865  | 0.528896 | 10.01   | 5.36   | 7.56   | 5.53   |
| -2.96     | -11.95  | -0.761 | 0.544741 | 35.27   | 34.72  | 35.03  | 2.65   |
| 3.62      | 85.7    | 3.029  | 0.163087 | 164.35  | 187.81 | 174.31 | 14.56  |
| -4.47     | -94.76  | -4.473 | 0.125316 | 137.04  | 214.02 | 175.18 | 38.99  |
| 10.72     | 17.47   | 4.74   | 0.05606  | 18.28   | 21.81  | 19.75  | 3.59   |
| -5.24     | -100.89 | -2.866 | 0.107134 | 199.19  | 227.03 | 212.55 | 18.9   |
| 6.13      | 20.09   | 1.742  | 0.286315 | 39.17   | 33.22  | 35.9   | 4      |
| -2.38     | -11     | -1.163 | 0.388709 | 47.27   | 42.18  | 44.69  | 4.19   |
| 4.3       | 6.88    | 0.562  | 0.631806 | 10.06   | 4.25   | 6.64   | 6.21   |
| -2.14     | -11.14  | -1.758 | 0.244266 | 26.25   | 18.04  | 22.48  | 4.97   |
| -3.99     | -19.77  | -2.061 | 0.211799 | 12.8    | 10.82  | 12.02  | 3.06   |
| -11.16    | -176.26 | -5.729 | 0.101499 | 9.5     | 14.29  | 11.35  | 3.66   |
| -130.07   | -20.4   | -1.395 | 0.386131 | 6.59    | 52.23  | 29.44  | 22.78  |
| 2.24      | 8.78    | 0.783  | 0.542862 | 43.43   | 43.46  | 43.44  | 4.88   |
| -2.65     | -15.03  | -1.962 | 0.18886  | 35.19   | 35.97  | 35.69  | 2.77   |
| -3.32     | -13.13  | -1.166 | 0.407839 | 50.89   | 52.97  | 51.85  | 4.6    |
| -7.53     | -16.59  | -3.128 | 0.088797 | 11.09   | 4.51   | 7.88   | 4.99   |
| -3.94     | -16.81  | -2.038 | 0.178623 | 35.62   | 19.03  | 27.33  | 9.24   |
| 1.68      | 7.77    | 1.579  | 0.261414 | 23.92   | 17.66  | 21.36  | 4.19   |
| -9.19     | -13.7   | -0.455 | 0.718181 | 4.61    | 4.04   | 4.33   | 3.74   |
| -2.2      | -2.23   | -0.171 | 0.891378 | 64.13   | 62.79  | 63.58  | 2.3    |

|            |         |        |          |        |        |        |        |
|------------|---------|--------|----------|--------|--------|--------|--------|
| 2.71       | 2.45    | 0.523  | 0.657361 | 11.36  | 17.73  | 14.38  | 3.59   |
| 4.74       | 21.8    | 2.17   | 0.202058 | 41.65  | 42.32  | 42     | 3.1    |
| -1.4       | -5.83   | -0.996 | 0.436897 | 55.14  | 61.63  | 58.73  | 5.38   |
| -7.16      | -114.8  | -3.14  | 0.164004 | 579.58 | 782.99 | 680.86 | 102.17 |
| -100000000 | -2.96   | -0.768 | 0.533026 | 19.15  | 1.53   | 10.05  | 9.47   |
| -3.24      | -101.24 | -3.564 | 0.131122 | 14.16  | 20.43  | 16.82  | 5.84   |
| -9.17      | -107.14 | -2.715 | 0.168372 | 23.38  | 36.91  | 30.24  | 6.87   |
| 27.21      | 6.34    | 1.549  | 0.262044 | 7.73   | 13.14  | 10.74  | 3.14   |
| -5.3       | -22.96  | -2.241 | 0.203544 | 27.02  | 17.14  | 21.65  | 6.73   |
| 3.57       | 44.86   | 4.555  | 0.102967 | 5.01   | 6.85   | 5.55   | 2.76   |
| -4.44      | -2.55   | -0.286 | 0.806286 | 499.7  | 590.21 | 544.85 | 46.52  |
| 100000000  | 7.78    | 1.49   | 0.295317 | 24.88  | 29.53  | 27.3   | 3.06   |
| 2.83       | 30.02   | 3.94   | 0.119304 | 30.39  | 25.21  | 28.51  | 4.4    |
| -2.39      | -14.8   | -1.561 | 0.261569 | 36.46  | 27.66  | 32.53  | 5.76   |
| 1.58       | 0.73    | 0.089  | 0.937924 | 57.09  | 53.65  | 55.69  | 3.52   |
| 1268.37    | 21.96   | 1.371  | 0.373978 | 7.85   | 8.09   | 7.94   | 3.23   |
| 100000000  | 48.99   | 3.302  | 0.136589 | 4.23   | 3.71   | 3.98   | 3.68   |
| -100000000 | -1.04   | -0.112 | 0.924602 | 7.72   | 14.39  | 11.38  | 4.44   |
| 2.52       | 5.17    | 0.39   | 0.73485  | 21.99  | 21.74  | 21.87  | 3.04   |
| -1.93      | -1.79   | -0.159 | 0.888515 | 35.09  | 35.05  | 35.08  | 3.1    |
| 14.4       | 16.56   | 1.23   | 0.392749 | 22.59  | 14.65  | 18.6   | 4.71   |
| -3.18      | -2.53   | -0.407 | 0.727901 | 19.18  | 11.77  | 15.41  | 4.99   |
| -11.48     | -89.34  | -3.482 | 0.115798 | 58.38  | 61.65  | 59.87  | 4.41   |
| 1.68       | 11.23   | 1.851  | 0.205362 | 49.25  | 45.72  | 47.49  | 2.83   |
| 3.45       | 32.66   | 2.505  | 0.212411 | 28.51  | 33.58  | 30.17  | 4.6    |
| 100000000  | 3.06    | 0.573  | 0.626605 | 1.67   | 1.93   | 1.79   | 1.46   |
| -20.49     | -82.32  | -2.683 | 0.166003 | 156.6  | 133.73 | 144.89 | 13.4   |
| -1.88      | -51.26  | -1.752 | 0.230559 | 251.15 | 329.73 | 291.81 | 41.12  |



| LDE225 A112 | LDE225 B112 | experiment rr | experiment rr | fold change | lower bound | upper bound | difference of | t statistic |
|-------------|-------------|---------------|---------------|-------------|-------------|-------------|---------------|-------------|
| 131.1       | 121.95      | 127.52        | 13.04         | -1.18       | -0.97       | -1.46       | -23.34        | -1.388      |
| 403.79      | 390.82      | 398.33        | 15.28         | -1.09       | -0.97       | -1.21       | -34.23        | -1.244      |
| 386.63      | 406.32      | 396.49        | 17.96         | 1.14        | 0.84        | 1.71        | 47.92         | 0.659       |
| 159.54      | 179.78      | 169.01        | 13.87         | -1.19       | -1.01       | -1.41       | -31.89        | -1.757      |
| 1537.31     | 1560.38     | 1551.31       | 39.16         | -1.08       | -0.82       | -1.36       | -129.24       | -0.509      |
| 346.55      | 332.31      | 338.18        | 13.94         | -1.19       | -1.06       | -1.32       | -63.84        | -2.56       |
| 1213.36     | 1219.42     | 1215.84       | 32.28         | 1.09        | 0.95        | 1.27        | 99.9          | 1.021       |
| 1014.54     | 893.95      | 951.76        | 71.47         | -1.46       | -1.08       | -1.87       | -433.08       | -2.021      |
| 696.78      | 644.01      | 669.87        | 32.29         | -1.43       | -1.16       | -1.71       | -288.22       | -2.704      |
| 1821.41     | 1618.98     | 1713.81       | 116.26        | -1.39       | -1.06       | -1.75       | -661.82       | -1.955      |
| 1690.82     | 1882.72     | 1784.88       | 130.42        | 1.05        | 0.91        | 1.21        | 92.06         | 0.615       |
| 256.19      | 230.97      | 242.42        | 21.71         | -1.04       | -0.85       | -1.28       | -9.73         | -0.321      |
| 26.56       | 30.72       | 28.7          | 9.37          | 1.39        | 0.56        | 3.95        | 8             | 0.656       |
| 681.36      | 719.49      | 700.74        | 22.93         | -1.02       | -0.93       | -1.11       | -11.51        | -0.31       |
| 895.46      | 928.42      | 912.52        | 24.64         | 1           | 0.9         | 1.12        | 0.49          | 0.008       |
| 2520.95     | 2509.26     | 2516.67       | 47.19         | -1.04       | -0.89       | -1.18       | -89.76        | -0.401      |
| 152.9       | 131.2       | 141.78        | 14.42         | 1.12        | 0.91        | 1.38        | 15.61         | 0.907       |
| 511.69      | 577.76      | 544.37        | 36.05         | 1.23        | 1.02        | 1.49        | 101.41        | 1.864       |

|         |         |         |       |       |       |            |         |        |
|---------|---------|---------|-------|-------|-------|------------|---------|--------|
| 14.82   | 12.58   | 13.87   | 2.89  | -1.05 | -0.51 | -1.86      | -0.64   | -0.125 |
| 390.79  | 365.97  | 378.43  | 15.35 | -1.01 | -0.91 | -1.11      | -3.64   | -0.158 |
| 26.18   | 22.8    | 24.8    | 2.86  | 1.33  | 0.9   | 2.26       | 6.22    | 1.177  |
| 21.26   | 27.15   | 24.05   | 16.58 | -1.43 | 0     | -100000000 | -10.3   | -0.365 |
| 220.58  | 204.27  | 213.03  | 18.78 | 1.21  | 0.95  | 1.56       | 36.37   | 1.294  |
| 62.4    | 77.62   | 71.07   | 9.74  | -1.16 | -0.88 | -1.57      | -11.29  | -0.864 |
| 1247.28 | 1239.65 | 1243.19 | 23.63 | 1     | 0.92  | 1.1        | 6.02    | 0.091  |
| 96.6    | 110.72  | 102.94  | 15.71 | -1.18 | -0.85 | -1.67      | -18.99  | -0.854 |
| 843.81  | 738.8   | 792     | 59.7  | 1.15  | 0.93  | 1.45       | 103.34  | 1.059  |
| 565.74  | 466.73  | 516.16  | 50.47 | -1.04 | -0.83 | -1.3       | -18.19  | -0.258 |
| 373.04  | 402.39  | 387.46  | 19.59 | -1.05 | -0.95 | -1.17      | -21.21  | -0.834 |
| 904.98  | 845.25  | 874.44  | 36.52 | 1.01  | 0.89  | 1.15       | 8.63    | 0.132  |
| 396.07  | 362.22  | 379.73  | 20.68 | 1.07  | 0.94  | 1.22       | 25.27   | 0.87   |
| 2115.77 | 1813.28 | 1968.23 | 157.7 | 1.1   | 0.95  | 1.26       | 178.37  | 1.072  |
| 114.82  | 113.42  | 114.2   | 9.7   | -1.01 | -0.84 | -1.22      | -1.54   | -0.119 |
| 623.45  | 527.26  | 574.47  | 53.27 | -1.01 | -0.86 | -1.22      | -8.35   | -0.14  |
| 12.75   | 4.58    | 8.33    | 8.8   | 1.3   | 0     | 100000000  | 1.92    | 0.181  |
| 111.97  | 105.71  | 108.65  | 13.56 | 1.02  | 0.72  | 1.52       | 2.3     | 0.098  |
| 124.58  | 96.88   | 110.04  | 20.67 | -1.19 | -0.72 | -1.91      | -21.18  | -0.613 |
| 77.51   | 70.76   | 74.21   | 12.7  | 1.12  | 0.73  | 1.74       | 8.01    | 0.452  |
| 377.28  | 332.58  | 354.69  | 29.04 | 1.13  | 0.94  | 1.35       | 39.91   | 1.087  |
| 43.46   | 35.1    | 38.4    | 12.27 | 1.13  | 0.51  | 2          | 4.31    | 0.309  |
| 2.24    | 17.19   | 9.72    | 7.55  | -2    | -0.04 | -100000000 | -9.76   | -0.704 |
| 60.21   | 56.9    | 58.21   | 6.39  | -1.06 | -0.7  | -1.5       | -3.78   | -0.278 |
| 794.46  | 741.37  | 767.57  | 41.71 | 1     | 0.9   | 1.11       | 2.94    | 0.062  |
| 863.97  | 870.15  | 866.82  | 16.71 | -1    | -0.95 | -1.06      | -3.49   | -0.13  |
| 11.66   | 18      | 14.74   | 6.53  | -1.16 | -0.32 | -4.63      | -2.4    | -0.246 |
| 39.52   | 32.43   | 35.87   | 5.31  | -1.1  | -0.54 | -1.79      | -3.49   | -0.27  |
| 879.55  | 876.68  | 877.78  | 16.75 | -1.16 | -0.95 | -1.38      | -142.42 | -1.228 |
| 39.22   | 56.36   | 48.2    | 9.12  | -1.46 | -1.07 | -2.16      | -22.07  | -2.054 |
| 1968.16 | 2096.29 | 2032.77 | 69.77 | 1.06  | 0.9   | 1.29       | 120.08  | 0.58   |
| 45.71   | 32.55   | 38.82   | 9.49  | -1.07 | -0.58 | -1.97      | -2.65   | -0.192 |
| 157.59  | 166.57  | 162.38  | 6.63  | 1.11  | 0.84  | 1.63       | 16.35   | 0.573  |
| 330.8   | 270.45  | 299.22  | 34.8  | -1.06 | -0.86 | -1.35      | -19.24  | -0.47  |
| 361.86  | 281.01  | 320.86  | 44.04 | 1.08  | 0.83  | 1.33       | 22.63   | 0.501  |
| 391.65  | 354.23  | 371.14  | 24.28 | 1.12  | 0.98  | 1.26       | 38.61   | 1.4    |

|         |         |         |        |       |       |            |         |        |
|---------|---------|---------|--------|-------|-------|------------|---------|--------|
| 136.73  | 154.69  | 145.53  | 12.22  | 1.06  | 0.87  | 1.29       | 7.8     | 0.46   |
| 6664.23 | 6373.1  | 6520.5  | 169.27 | 1.1   | 1.03  | 1.18       | 613.89  | 2.35   |
| 154.42  | 145.14  | 150.21  | 12.54  | -1.07 | -0.9  | -1.28      | -10.9   | -0.666 |
| 194.86  | 156.89  | 176.08  | 22.4   | -1.21 | -0.89 | -1.63      | -36.11  | -1.028 |
| 141.54  | 95.68   | 118.3   | 25.75  | 1.07  | 0.68  | 1.5        | 8.17    | 0.303  |
| 431.53  | 367.01  | 396.83  | 46.16  | 1.11  | 0.86  | 1.42       | 38.33   | 0.663  |
| 386.75  | 383.84  | 385.34  | 44.3   | 1.01  | 0.78  | 1.29       | 3.5     | 0.061  |
| 103.08  | 100.11  | 101.46  | 4.31   | -1.03 | -0.86 | -1.21      | -2.9    | -0.266 |
| 5.28    | 3.58    | 4.26    | 4.06   | -1.05 | -0.04 | -100000000 | -0.2    | -0.041 |
| 822.32  | 685.39  | 753.01  | 71.7   | 1     | 0.83  | 1.19       | 1.04    | 0.012  |
| 28.23   | 21.92   | 24.5    | 7.91   | -1.2  | -0.45 | -2.89      | -4.83   | -0.366 |
| 2795.25 | 3026.08 | 2910.07 | 121.42 | -1.05 | -0.81 | -1.31      | -147.36 | -0.335 |
| 671.61  | 601.84  | 635.85  | 38.7   | 1.01  | 0.85  | 1.21       | 7.99    | 0.12   |
| 29.81   | 21.62   | 25.25   | 12.11  | 1.35  | 0.27  | 6.35       | 6.53    | 0.437  |
| 99.96   | 85.28   | 92.52   | 13.98  | -1.04 | -0.73 | -1.48      | -3.37   | -0.17  |
| 37.09   | 39.49   | 38.41   | 5.31   | 1.03  | 0.68  | 1.78       | 1.22    | 0.117  |
| 257.39  | 257.67  | 257.53  | 12.82  | -1.11 | -0.91 | -1.32      | -28.21  | -0.904 |
| 6.31    | 4.38    | 5.21    | 6.88   | 1.12  | 0     | 100000000  | 0.57    | 0.064  |
| 2153.14 | 2202.43 | 2185.91 | 46.7   | 1.01  | 0.92  | 1.1        | 13.31   | 0.115  |
| 9.4     | 17.25   | 12.8    | 5      | -1.48 | -0.77 | -4.27      | -6.16   | -0.972 |
| 14.9    | 5.2     | 9.85    | 6      | -1.07 | -0.26 | -100000000 | -0.73   | -0.096 |
| 27.5    | 32.76   | 29.75   | 4.64   | 1.06  | 0.68  | 1.82       | 1.64    | 0.201  |
| 298.19  | 293.98  | 296.03  | 10.04  | -1.11 | -1.03 | -1.2       | -33.13  | -2.283 |
| 30.17   | 25.08   | 26.99   | 6.03   | 1.13  | 0.65  | 1.94       | 3.03    | 0.377  |
| 98.95   | 125.51  | 112.61  | 15.41  | 1.09  | 0.82  | 1.4        | 9.3     | 0.53   |
| 362.62  | 332.77  | 346.89  | 18.57  | -1.04 | -0.86 | -1.23      | -13.07  | -0.336 |
| 42.71   | 47.91   | 45.14   | 4.22   | 1.4   | 0.78  | 5.43       | 12.8    | 0.843  |
| 94.75   | 125.17  | 110.03  | 16.62  | -1.48 | -1.15 | -1.99      | -52.3   | -2.725 |
| 24.71   | 20.67   | 22.56   | 3.86   | -1.26 | -0.58 | -2.15      | -5.8    | -0.594 |
| 269.94  | 238.04  | 252.57  | 29.69  | -1.21 | -0.98 | -1.54      | -54.1   | -1.476 |
| 12.5    | 29.69   | 21.09   | 8.68   | 1.18  | 0.37  | 2.14       | 3.16    | 0.346  |
| 83.6    | 83.26   | 83.43   | 3.86   | 1.21  | 0.99  | 1.54       | 14.72   | 1.598  |
| 19.75   | 12.21   | 15.83   | 6.91   | 1.79  | 0.47  | 6.56       | 6.99    | 0.889  |
| 42.73   | 34.73   | 39.15   | 6.14   | -1.22 | -0.85 | -1.76      | -8.68   | -0.929 |
| 10.29   | 4.19    | 7.81    | 4.76   | -1.41 | 0     | -100000000 | -3.18   | -0.354 |
| 18.03   | 21.39   | 19.85   | 12.2   | 1.18  | 0     | 4.36       | 3.03    | 0.216  |

|          |          |         |        |       |       |            |         |        |
|----------|----------|---------|--------|-------|-------|------------|---------|--------|
| 679.98   | 730.69   | 705.47  | 29.76  | 1.15  | 1.05  | 1.25       | 91.14   | 2.602  |
| 129.73   | 94.36    | 109.8   | 26.81  | -1.08 | -0.67 | -1.91      | -8.67   | -0.255 |
| 1411.82  | 1477.9   | 1448.17 | 43.19  | -1.1  | -0.82 | -1.38      | -137.68 | -0.558 |
| 937.79   | 897.95   | 917.28  | 51.85  | -1    | -0.89 | -1.13      | -1.79   | -0.027 |
| 697.02   | 749.57   | 722.73  | 50.5   | -1.1  | -0.79 | -1.44      | -73.93  | -0.527 |
| 598.92   | 624.34   | 610.61  | 18.69  | -1.08 | -1.01 | -1.15      | -47.35  | -1.815 |
| 471      | 446.9    | 460.26  | 21.14  | -1.04 | -0.85 | -1.23      | -17     | -0.321 |
| 842.6    | 999.38   | 918.36  | 83.29  | -1.04 | -0.86 | -1.27      | -40.06  | -0.367 |
| 132.55   | 131.16   | 131.72  | 6.21   | -1.17 | -1.04 | -1.32      | -22.66  | -2.136 |
| 781.59   | 1105.16  | 944.19  | 161.97 | -1.05 | -0.47 | -1.81      | -46.86  | -0.13  |
| 705.21   | 664.89   | 682.47  | 31.66  | -1.15 | -1.04 | -1.26      | -99.42  | -2.384 |
| 251.33   | 242.14   | 246.21  | 11.23  | -1.38 | -1.09 | -1.69      | -94.33  | -2.153 |
| 999.92   | 1076.01  | 1038.61 | 43.66  | 1.07  | 0.96  | 1.19       | 68.35   | 1.042  |
| 1890.69  | 1669.84  | 1780.68 | 117.86 | -1.01 | -0.87 | -1.18      | -23.02  | -0.136 |
| 28.03    | 19.91    | 24.02   | 8.4    | 1.27  | 0.47  | 4.12       | 5.1     | 0.448  |
| 28.15    | 17.75    | 21.64   | 11.76  | 1.05  | 0.11  | 2.69       | 1.11    | 0.084  |
| 18.37    | 22.8     | 20.38   | 11.29  | 1.23  | 0.11  | 4.96       | 3.76    | 0.28   |
| 16.24    | 26.08    | 20.83   | 15.94  | 1.07  | 0     | 100000000  | 1.43    | 0.07   |
| 259.33   | 224.24   | 241.43  | 22.95  | -1.21 | -1    | -1.48      | -51.57  | -1.677 |
| 978.33   | 989.08   | 984.73  | 14.58  | 1.13  | 1.07  | 1.19       | 112.35  | 3.866  |
| 7.08     | 17.51    | 12.05   | 6.76   | 1.33  | 0.1   | 100000000  | 2.98    | 0.322  |
| 12286.03 | 12601.65 | 12468.2 | 214.94 | -1.05 | -1.01 | -1.09      | -620.43 | -2.195 |
| 5.42     | 1.93     | 3.32    | 3      | -3.71 | -0.98 | -100000000 | -9      | -1.625 |
| 25.22    | 25.82    | 25.56   | 2.2    | 1.19  | 0.86  | 1.81       | 4.03    | 0.828  |
| 37.38    | 43.39    | 40.47   | 6.84   | -1.03 | -0.66 | -1.57      | -1.21   | -0.116 |
| 94.84    | 73.28    | 83.1    | 13.26  | 1.39  | 1     | 1.84       | 23.42   | 1.648  |
| 9.29     | 4.23     | 6.85    | 3.86   | -1.49 | -0.24 | -20.89     | -3.39   | -0.528 |
| 61.68    | 48.57    | 55.18   | 7.19   | -1.08 | -0.6  | -1.67      | -4.66   | -0.27  |
| 36.37    | 63.21    | 49.6    | 14.62  | -1.21 | -0.79 | -2.36      | -10.25  | -0.664 |
| 30.07    | 30.01    | 30.05   | 2.4    | -1.01 | 0     | -2.05      | -0.24   | -0.013 |
| 167.21   | 172.48   | 170.45  | 7.37   | -1.1  | -1    | -1.22      | -17.77  | -1.595 |
| 673.62   | 664.92   | 667.78  | 21.69  | 1.11  | 1.03  | 1.21       | 67.07   | 2.15   |
| 25.23    | 21.7     | 22.92   | 4.72   | 1.15  | 0.7   | 1.86       | 2.97    | 0.487  |
| 165.32   | 132.41   | 149.19  | 18.38  | -1.01 | -0.79 | -1.31      | -0.8    | -0.035 |
| 2249.2   | 2090.88  | 2174.09 | 101.6  | 1.35  | 1.22  | 1.48       | 562.19  | 4.864  |
| 11.35    | 32.17    | 21.63   | 10.81  | -1.18 | -0.57 | -6.71      | -3.89   | -0.325 |

|         |         |         |        |       |       |            |         |        |
|---------|---------|---------|--------|-------|-------|------------|---------|--------|
| 29.07   | 32.77   | 30.88   | 12.46  | -1.1  | -0.43 | -3.5       | -3.05   | -0.181 |
| 25.47   | 18.44   | 21.06   | 8.45   | -1.04 | -0.37 | -3.31      | -0.78   | -0.067 |
| 1882.25 | 1701.73 | 1791.54 | 95.77  | -1.03 | -0.89 | -1.18      | -51.5   | -0.33  |
| 7361.97 | 7171.91 | 7237.86 | 176.25 | 1.08  | 1.03  | 1.13       | 512.94  | 2.555  |
| 196.43  | 195.19  | 195.79  | 6.63   | 1.08  | 0.97  | 1.21       | 14.43   | 1.162  |
| 349.09  | 389.25  | 368.76  | 20.98  | -1.09 | -0.97 | -1.24      | -34.24  | -1.174 |
| 439.67  | 508.41  | 474.15  | 35.7   | 1.03  | 0.87  | 1.2        | 12.11   | 0.273  |
| 1578.56 | 1522.18 | 1549.56 | 46.18  | 1.19  | 1.11  | 1.29       | 248.82  | 3.852  |
| 1962.94 | 2003.7  | 1985.13 | 42.09  | 1.03  | 0.99  | 1.07       | 60.7    | 1.316  |
| 183.18  | 212.77  | 197.4   | 18.65  | 1.38  | 1.08  | 1.77       | 54.18   | 2.189  |
| 572.45  | 595.1   | 585.72  | 41.55  | 1.01  | 0.83  | 1.25       | 7.39    | 0.105  |
| 763.16  | 831.24  | 798.93  | 36.8   | -1.23 | -0.9  | -1.58      | -185.76 | -1.151 |
| 340.63  | 309.11  | 324.35  | 17.08  | -1.02 | -0.83 | -1.21      | -5.2    | -0.141 |
| 375.57  | 375.19  | 375.37  | 13.81  | 1.09  | 0.99  | 1.2        | 29.86   | 1.408  |
| 694.13  | 694.51  | 694.32  | 11.85  | 1.07  | 0.93  | 1.26       | 45.96   | 0.776  |
| 41.6    | 32.99   | 37.28   | 5.79   | -1.14 | -0.76 | -1.67      | -5.09   | -0.548 |
| 233.21  | 221.22  | 228.18  | 9.28   | 1.02  | 0.93  | 1.11       | 3.41    | 0.268  |
| 29.16   | 23.94   | 25.89   | 9.83   | 1.28  | 0.43  | 4          | 5.7     | 0.45   |
| 5.04    | 4.69    | 4.81    | 1.99   | 1.2   | 0.31  | 100000000  | 0.81    | 0.238  |
| 1       | 1       | 1       | 0.57   | 1     | 0.06  | 100000000  | 0       | 0      |
| 214.2   | 212.28  | 213.23  | 9.48   | -1.07 | -0.96 | -1.2       | -15.79  | -1.064 |
| 34.46   | 19.62   | 26.96   | 7.99   | -1.07 | -0.5  | -2.32      | -2.02   | -0.173 |
| 72.47   | 77.99   | 75.73   | 6.64   | 1.03  | 0.79  | 1.37       | 2.05    | 0.169  |
| 72.77   | 86.83   | 80.11   | 8.53   | -1.35 | -1.14 | -1.66      | -28.32  | -2.974 |
| 33.25   | 42.93   | 38.26   | 5.8    | 1.36  | 0.89  | 2.21       | 10.04   | 1.191  |
| 3.52    | 22.57   | 13.44   | 9.76   | -1.44 | -0.37 | -100000000 | -5.96   | -0.474 |
| 181.54  | 160.15  | 171.25  | 13.58  | 1.04  | 0.88  | 1.22       | 6.16    | 0.367  |
| 452.42  | 530.94  | 491.75  | 39.43  | 1.27  | 1.09  | 1.47       | 105.5   | 2.457  |
| 2305.47 | 2402.55 | 2368.9  | 77.24  | -1.07 | -0.97 | -1.19      | -171.11 | -1.101 |
| 2.54    | 10.63   | 6.24    | 4.8    | 1.81  | 0     | 100000000  | 2.79    | 0.512  |
| 852.95  | 779.39  | 814.99  | 42.81  | -1.26 | -1.14 | -1.4       | -212.17 | -3.939 |
| 28.09   | 43.13   | 35.5    | 7.81   | 2.37  | 1.3   | 4.98       | 20.52   | 2.277  |
| 160.68  | 61.88   | 111.04  | 50.5   | 1.89  | 0.47  | 3.53       | 52.17   | 1.018  |
| 34.53   | 52.83   | 43.85   | 9.71   | -1.01 | -0.64 | -1.7       | -0.62   | -0.05  |
| 28.21   | 28.63   | 28.36   | 3.33   | 1.45  | 1.03  | 2.2        | 8.87    | 1.772  |
| 1216.2  | 1187    | 1200.81 | 40.02  | 1.09  | 0.99  | 1.2        | 101.59  | 1.538  |

|         |         |         |        |       |       |            |         |        |
|---------|---------|---------|--------|-------|-------|------------|---------|--------|
| 44.74   | 34.94   | 39.74   | 5.6    | 1.63  | 0.71  | 100000000  | 15.42   | 0.842  |
| 718.25  | 642.86  | 679.02  | 43.06  | 1.17  | 0.98  | 1.41       | 99.55   | 1.474  |
| 39.7    | 31.96   | 35.76   | 7.25   | 1.25  | 0.65  | 4          | 7.21    | 0.521  |
| 33.92   | 28.48   | 31.19   | 3.51   | 1.06  | 0.71  | 1.81       | 1.72    | 0.216  |
| 172.26  | 153.86  | 162.92  | 10.15  | 1     | 0.88  | 1.14       | 0.81    | 0.063  |
| 32.94   | 13.59   | 23.73   | 10.59  | -1.41 | -0.72 | -5.4       | -9.75   | -0.787 |
| 505.72  | 498.66  | 502.43  | 10.31  | 1.03  | 0.96  | 1.11       | 14.62   | 0.703  |
| 4421.48 | 4256.43 | 4332.34 | 111.57 | -1.07 | -1.01 | -1.13      | -300.46 | -2.046 |
| 48.92   | 43.67   | 45.25   | 7.59   | -1    | -0.68 | -1.49      | -0.04   | -0.004 |
| 24      | 56.61   | 40.89   | 17.58  | -2.28 | -0.67 | -8.45      | -52.28  | -1.243 |
| 1484.52 | 1447.24 | 1466.43 | 28.67  | 1.01  | 0.92  | 1.12       | 20.41   | 0.238  |
| 476.14  | 506.65  | 493.72  | 24.98  | 1.21  | 1.03  | 1.46       | 87.03   | 1.934  |
| 28.8    | 20.41   | 24.93   | 7.42   | -1.8  | -1.06 | -3.67      | -19.88  | -1.841 |
| 201.68  | 179.91  | 189.75  | 14.63  | -1.13 | -0.92 | -1.37      | -23.9   | -0.965 |
| 681.42  | 640.23  | 658.7   | 24.64  | 1.13  | 0.94  | 1.41       | 75.39   | 1.039  |
| 61.8    | 43.8    | 52.6    | 13.92  | 1.11  | 0.54  | 2.78       | 5.25    | 0.243  |
| 575.74  | 559.7   | 566.99  | 17.39  | 1.03  | 0.96  | 1.11       | 17.63   | 0.727  |
| 1.74    | 3.52    | 2.7     | 2.06   | 1.44  | 0     | 100000000  | 0.82    | 0.289  |
| 117.75  | 112.82  | 115.45  | 7.97   | -1.01 | -0.84 | -1.21      | -1.49   | -0.115 |
| 5.05    | 8.08    | 6.56    | 2.72   | -1.75 | 0     | -6.97      | -4.89   | -0.537 |
| 63.14   | 47.63   | 55.46   | 12.64  | -1.27 | -0.84 | -2.11      | -14.85  | -0.921 |
| 174.92  | 161.74  | 168.07  | 10.26  | 1.02  | 0.9   | 1.15       | 3.25    | 0.26   |
| 1162.9  | 1217.27 | 1193.22 | 49.03  | 1.07  | 0.98  | 1.17       | 79.58   | 1.237  |
| 949.49  | 954.63  | 952.71  | 23.19  | -1.1  | -0.95 | -1.24      | -91.07  | -1.097 |
| 61.49   | 51.97   | 55.79   | 13.54  | 1.14  | 0.62  | 2.14       | 6.87    | 0.374  |
| 479.23  | 554.86  | 517.16  | 39.48  | -1.16 | -0.91 | -1.44      | -80.26  | -1.028 |
| 172.11  | 171.75  | 171.94  | 9.27   | -1.13 | -0.98 | -1.31      | -22.8   | -1.382 |
| 65.66   | 69.04   | 67.67   | 12.11  | 1.07  | 0.67  | 1.78       | 4.27    | 0.232  |
| 606.45  | 656.95  | 631.05  | 27.6   | 1.06  | 0.94  | 1.2        | 33.41   | 0.742  |
| 181.82  | 199.75  | 189.66  | 12.95  | -1.09 | -0.91 | -1.3       | -17.79  | -0.834 |
| 11.8    | 10.62   | 11.03   | 3.49   | -1.14 | -0.46 | -2.67      | -1.56   | -0.281 |
| 1.13    | 5.29    | 3.04    | 2.59   | -1.14 | 0     | -100000000 | -0.42   | -0.116 |
| 87.96   | 62.45   | 74.98   | 14.11  | -1.03 | -0.73 | -1.55      | -2.35   | -0.142 |
| 6.37    | 13.99   | 10.09   | 6.38   | -1.2  | -0.25 | -100000000 | -2      | -0.236 |
| 855.39  | 870.17  | 864.74  | 14.71  | 1.01  | 0.97  | 1.05       | 9.18    | 0.445  |
| 77.91   | 73.1    | 74.97   | 9.11   | -1.07 | -0.76 | -1.48      | -5.6    | -0.36  |

|         |         |         |        |       |       |            |         |        |
|---------|---------|---------|--------|-------|-------|------------|---------|--------|
| 1.65    | 1       | 1.25    | 1.54   | -2.4  | 0     | -100000000 | -1.75   | -0.453 |
| 12.53   | 18.63   | 15.82   | 5.14   | 1.11  | 0.42  | 7.29       | 1.59    | 0.178  |
| 643.52  | 516.81  | 579.5   | 69.1   | -1.04 | -0.74 | -1.43      | -24.08  | -0.207 |
| 41.54   | 26.59   | 32.44   | 14.86  | 1.32  | 0.32  | 2.78       | 7.94    | 0.499  |
| 99.82   | 120.81  | 110.69  | 11.27  | 1.09  | 0.84  | 1.42       | 8.92    | 0.535  |
| 44.9    | 59.02   | 51.67   | 9.36   | -1.14 | -0.85 | -1.67      | -7.48   | -0.706 |
| 303.12  | 275.16  | 288.6   | 17.83  | 1.06  | 0.93  | 1.2        | 16.46   | 0.751  |
| 18.76   | 7.96    | 12.78   | 6.42   | 1.53  | 0.26  | 3.25       | 4.44    | 0.665  |
| 3081.03 | 2853.43 | 2967.91 | 122.28 | 1.01  | 0.93  | 1.09       | 30.34   | 0.207  |
| 87.36   | 73.15   | 80.76   | 8.12   | 1.26  | 0.91  | 1.88       | 16.48   | 1.124  |
| 87.14   | 96.23   | 91.67   | 9.07   | 1.19  | 0.85  | 1.81       | 14.84   | 0.839  |
| 197.27  | 243.59  | 219.62  | 26.58  | 1.07  | 0.85  | 1.31       | 14.24   | 0.504  |
| 83.98   | 80.17   | 82.43   | 11.16  | 1.01  | 0.72  | 1.4        | 0.49    | 0.03   |
| 49.43   | 30.51   | 39.63   | 11.41  | 1.01  | 0.52  | 1.65       | 0.55    | 0.042  |
| 60.04   | 37.6    | 48.6    | 12.53  | 1.36  | 0.74  | 2.26       | 12.97   | 0.919  |
| 172.86  | 193.98  | 184.93  | 13.74  | -1.23 | -0.95 | -1.54      | -42.08  | -1.347 |
| 121.73  | 67.55   | 92.67   | 30.84  | -1.14 | -0.7  | -2.56      | -13.11  | -0.395 |
| 318.78  | 323.74  | 321.32  | 6.61   | -1.06 | -0.98 | -1.14      | -19.86  | -1.259 |
| 1078.85 | 932.86  | 1001.04 | 83     | 1.11  | 0.92  | 1.33       | 96.06   | 0.893  |
| 62.46   | 69.16   | 65.67   | 5.28   | -1.27 | -1.06 | -1.53      | -17.87  | -2.156 |
| 469.02  | 437.63  | 452.55  | 17.31  | -1.01 | -0.92 | -1.1       | -2.59   | -0.109 |
| 36.65   | 18.6    | 27.23   | 10.1   | -1.03 | -0.46 | -2.82      | -0.77   | -0.059 |
| 221.97  | 211.14  | 216.89  | 8.38   | -1.19 | -1.09 | -1.29      | -40.21  | -3.446 |
| 23.82   | 24.08   | 23.95   | 6.22   | -1.26 | -0.55 | -2.53      | -6.24   | -0.541 |
| 62.42   | 61.26   | 62.01   | 4.45   | -1.44 | -1.11 | -1.81      | -27.25  | -2.197 |
| 1071.37 | 1213.46 | 1140.4  | 76.53  | 1.14  | 0.98  | 1.33       | 142.16  | 1.434  |
| 380.45  | 389.55  | 384.62  | 8.74   | -1.06 | -1.01 | -1.11      | -23.12  | -2.035 |
| 15.42   | 11.68   | 13.85   | 3.97   | -1.78 | -1.1  | -3.49      | -10.85  | -1.966 |
| 400.01  | 399.16  | 399.45  | 17.56  | 1.37  | 1.22  | 1.55       | 108.48  | 4.412  |
| 610.07  | 525.36  | 567.76  | 44.59  | 1.49  | 1.28  | 1.71       | 187.05  | 3.991  |
| 1062.29 | 924.03  | 992.96  | 72.23  | 1.64  | 1.43  | 1.85       | 386.28  | 5.179  |
| 2264.24 | 2011.77 | 2134.04 | 134.62 | -1.15 | -1.04 | -1.29      | -327.31 | -2.276 |
| 149.57  | 163.51  | 156.84  | 9.9    | -1.33 | -1.15 | -1.55      | -52.42  | -3.183 |
| 39.26   | 23.64   | 31.13   | 10.39  | 1.7   | 0.68  | 4.52       | 12.77   | 1.038  |
| 412.6   | 367.05  | 388.2   | 27.68  | -1.26 | -1.11 | -1.45      | -102.41 | -3.08  |
| 130.13  | 128.08  | 129.18  | 5.85   | -1.05 | -0.95 | -1.17      | -6.79   | -0.789 |

|         |         |         |        |       |       |           |          |        |
|---------|---------|---------|--------|-------|-------|-----------|----------|--------|
| 662.92  | 894.94  | 778.18  | 116.79 | 1.31  | 0.91  | 1.88      | 184.73   | 1.252  |
| 37.13   | 32.6    | 34.61   | 4.26   | 3.11  | 1.62  | 18.55     | 23.48    | 3.328  |
| 10.25   | 37.18   | 23.75   | 13.55  | 1.44  | 0.09  | 3.48      | 7.26     | 0.51   |
| 379.23  | 345.21  | 364.13  | 22.51  | -1.23 | -1.05 | -1.44     | -83.29   | -2.083 |
| 32.56   | 25.65   | 28.77   | 4.75   | -1.27 | -0.98 | -1.75     | -7.66    | -1.529 |
| 1404.78 | 1143.72 | 1272.89 | 134.62 | 1.35  | 1.11  | 1.59      | 327.11   | 2.381  |
| 872.21  | 983.72  | 930.54  | 64.41  | 1.22  | 1.01  | 1.49      | 166.53   | 1.696  |
| 883.97  | 850.95  | 865.31  | 40.15  | -1.07 | -0.86 | -1.3      | -63.12   | -0.546 |
| 796.55  | 719.44  | 759.09  | 49.14  | 1.26  | 1.11  | 1.43      | 158.93   | 2.901  |
| 49.01   | 7.73    | 28.34   | 21.14  | 2.65  | 0     | 7.77      | 17.66    | 0.825  |
| 77.41   | 94.3    | 85.35   | 10.84  | -1.1  | -0.83 | -1.48     | -8.92    | -0.571 |
| 140.65  | 148.39  | 144.8   | 6.98   | -1.31 | -1.18 | -1.46     | -45      | -4.234 |
| 131.51  | 107.98  | 120.27  | 13.92  | 1.12  | 0.86  | 1.45      | 13.19    | 0.744  |
| 19.04   | 10.08   | 15.37   | 5.94   | -1.87 | -1.1  | -5.2      | -13.4    | -1.987 |
| 35.88   | 23.53   | 30.16   | 6.97   | 1.56  | 0.89  | 2.67      | 10.82    | 1.337  |
| 7120.56 | 5884.16 | 6504.79 | 720.49 | -1.29 | -1.09 | -1.59     | -1900.08 | -2.498 |
| 840.67  | 830.34  | 834.56  | 28.22  | -1.29 | -1.17 | -1.42     | -242.15  | -4.075 |
| 22.65   | 46.74   | 35.34   | 12.46  | -1.14 | -0.66 | -2.78     | -5.09    | -0.366 |
| 718.72  | 641.53  | 679.1   | 46.51  | -1.2  | -1.03 | -1.41     | -137.87  | -1.929 |
| 26.15   | 18.05   | 22.08   | 4.81   | -1.53 | -1.01 | -2.51     | -11.74   | -1.676 |
| 44.34   | 43.99   | 44.17   | 4.32   | -1.59 | -1.33 | -1.94     | -26.1    | -4.306 |
| 112.88  | 91.03   | 101.44  | 13.47  | 1.23  | 0.94  | 1.58      | 19.27    | 1.284  |
| 1111.3  | 1092.34 | 1103.06 | 27.56  | 1.21  | 1.04  | 1.45      | 193.12   | 2.057  |
| 45.63   | 20.32   | 32.62   | 13.44  | 18.34 | 3.18  | 100000000 | 30.85    | 2.242  |
| 1343.91 | 1193.11 | 1267.78 | 83.39  | -1.11 | -0.99 | -1.24     | -134.32  | -1.559 |
| 633.79  | 607.69  | 618.38  | 43.67  | 1.19  | 1.01  | 1.41      | 100.03   | 1.739  |
| 725.21  | 725.42  | 725.31  | 44.18  | 1.21  | 1.04  | 1.43      | 127.23   | 2.019  |
| 117.11  | 103.26  | 109.84  | 13.67  | -1.22 | -0.94 | -1.6      | -24.12   | -1.268 |
| 708.41  | 627.58  | 668.57  | 42.22  | 1.79  | 1.56  | 2.05      | 295.59   | 6.333  |
| 372.65  | 322.14  | 348.31  | 28.71  | -1.16 | -1    | -1.36     | -54.81   | -1.627 |
| 1123.78 | 1192.08 | 1163.04 | 41.25  | 1.47  | 1.36  | 1.58      | 369.82   | 7.869  |
| 285.57  | 272.36  | 279.8   | 12.11  | 1.22  | 1.01  | 1.53      | 50.48    | 1.72   |
| 68.24   | 73.81   | 71.18   | 4.85   | 1.56  | 1.22  | 2.06      | 25.44    | 3.164  |
| 54.53   | 42.46   | 48.98   | 7.49   | -1.4  | -1.06 | -1.92     | -19.48   | -2.033 |
| 110.89  | 97.6    | 104.12  | 8.38   | -1.03 | -0.89 | -1.21     | -3.22    | -0.326 |
| 42.82   | 74.96   | 59.19   | 16.59  | 1.66  | 0.87  | 2.64      | 23.48    | 1.354  |



|         |         |         |        |       |       |            |        |        |
|---------|---------|---------|--------|-------|-------|------------|--------|--------|
| 39.81   | 46.64   | 43.24   | 6.8    | -1.2  | -0.9  | -1.67      | -8.53  | -1.015 |
| 596.9   | 781.2   | 689.8   | 92.58  | 1.45  | 1.09  | 1.88       | 214.65 | 2.098  |
| 49.08   | 48.8    | 48.91   | 4.68   | 1.31  | 1.03  | 1.68       | 11.59  | 1.854  |
| 28.69   | 28.94   | 28.83   | 8.42   | -1.67 | -1.04 | -3.31      | -19.35 | -1.777 |
| 55.95   | 49.64   | 52.6    | 5.19   | -1.3  | -1.01 | -1.65      | -15.68 | -1.735 |
| 46.98   | 27.66   | 38.09   | 11.4   | -1.2  | -0.74 | -2.43      | -7.69  | -0.588 |
| 39.06   | 37.65   | 38.19   | 4.53   | 1.7   | 1.21  | 2.53       | 15.78  | 2.593  |
| 440.74  | 441.19  | 441.03  | 14.14  | 1.13  | 1.01  | 1.28       | 51.93  | 1.864  |
| 11.32   | 4.75    | 8.1     | 4.46   | 1.05  | 0.1   | 4.58       | 0.38   | 0.067  |
| 106.86  | 79.43   | 92.37   | 17     | 1.76  | 1.14  | 2.67       | 39.9   | 2.083  |
| 32.65   | 12.37   | 22.68   | 11.08  | -1.85 | -0.99 | -9.43      | -19.17 | -1.599 |
| 171.36  | 168.41  | 169.54  | 6.75   | 1.22  | 1.09  | 1.39       | 30.97  | 2.838  |
| 23.75   | 33.12   | 28.69   | 5.33   | -1.61 | -1.11 | -2.43      | -17.38 | -2.133 |
| 2258.28 | 2087.88 | 2173.54 | 89.72  | 1.13  | 1.04  | 1.21       | 244.13 | 2.51   |
| 41.54   | 88.8    | 65.34   | 23.96  | -1.42 | -0.86 | -3.61      | -27.44 | -1.073 |
| 178.24  | 165.6   | 171.42  | 13.24  | 1.03  | 0.86  | 1.25       | 5.36   | 0.281  |
| 2467.75 | 2643.27 | 2557.82 | 100.18 | 1.18  | 1.08  | 1.29       | 397.3  | 3.118  |
| 28.37   | 34.37   | 31.03   | 4.38   | 1.16  | 0.73  | 2.19       | 4.22   | 0.49   |
| 40.22   | 42.54   | 41.23   | 6.04   | -1.13 | -0.65 | -1.74      | -5.23  | -0.407 |
| 107.45  | 108.94  | 108.33  | 7.26   | -1.29 | -1.11 | -1.5       | -31.08 | -2.748 |
| 2534.23 | 2779.72 | 2659    | 138    | 1.16  | 0.98  | 1.41       | 372.46 | 1.423  |
| 68.34   | 78.2    | 72.89   | 8.31   | 1.51  | 1.18  | 1.91       | 24.72  | 2.639  |
| 23.43   | 8.67    | 15.76   | 10.69  | -1.36 | -0.1  | -100000000 | -5.68  | -0.354 |
| 67.03   | 60.98   | 63.04   | 5.74   | 1.62  | 1.25  | 2.16       | 24.23  | 3.122  |
| 1025.83 | 1244.53 | 1137.35 | 111.4  | -1.06 | -0.51 | -1.66      | -63.23 | -0.163 |
| 452.23  | 512.69  | 483.44  | 35.41  | 1.12  | 0.96  | 1.29       | 50.37  | 1.211  |
| 163.85  | 177.73  | 170.31  | 7.74   | 1.06  | 0.94  | 1.19       | 9.12   | 0.777  |
| 25.74   | 49.08   | 37.08   | 12.37  | -1.18 | -0.74 | -2.65      | -6.84  | -0.53  |
| 28.69   | 19.62   | 23.87   | 6.17   | 1.39  | 0.7   | 3.09       | 6.66   | 0.813  |
| 24.87   | 14.12   | 19.23   | 6.41   | 1.11  | 0.46  | 2.61       | 1.92   | 0.227  |
| 34.06   | 33.27   | 33.61   | 3.79   | 2.38  | 1.55  | 4.46       | 19.48  | 3.572  |
| 209.12  | 200.85  | 204.78  | 6.76   | -1.02 | -0.91 | -1.14      | -4.16  | -0.297 |
| 14.34   | 5.04    | 9.13    | 5.55   | -3.64 | -1.78 | -37200.44  | -24.06 | -3.808 |
| 146.93  | 144.03  | 145.21  | 9.66   | -1.21 | -1.01 | -1.44      | -30.2  | -1.717 |
| 158.31  | 166.87  | 162.95  | 7.85   | -1.27 | -0.8  | -1.76      | -44.06 | -0.934 |
| 183.82  | 205.79  | 194.1   | 15.23  | -1.15 | -0.96 | -1.39      | -30.07 | -1.275 |

|         |        |         |       |       |       |            |        |        |
|---------|--------|---------|-------|-------|-------|------------|--------|--------|
| 17.14   | 29.49  | 23.07   | 6.5   | 1.03  | 0.55  | 1.57       | 0.67   | 0.097  |
| 1675.52 | 1495.6 | 1584.14 | 95.4  | 1.07  | 0.91  | 1.28       | 109.31 | 0.69   |
| 25.13   | 27.62  | 26.58   | 3.1   | 1.01  | 0.67  | 1.78       | 0.38   | 0.052  |
| 183.49  | 165.56 | 174.15  | 11.84 | 1.1   | 0.93  | 1.32       | 15.93  | 0.907  |
| 502.08  | 502.19 | 502.13  | 15.53 | 1.1   | 1.03  | 1.18       | 46.25  | 2.249  |
| 18.41   | 16.2   | 17.05   | 5.36  | 1.59  | 0.7   | 3.38       | 6.3    | 1.018  |
| 26.22   | 26.74  | 26.58   | 2.48  | -1.18 | -0.9  | -1.51      | -4.74  | -1.033 |
| 5.88    | 21.49  | 13.8    | 8.28  | -2.43 | -1.18 | -181.4     | -19.7  | -2.184 |
| 29.01   | 25.7   | 26.98   | 3.86  | 1.67  | 1.11  | 2.76       | 10.87  | 2.062  |
| 29.63   | 2.46   | 15.9    | 14.29 | 1.37  | 0     | 100000000  | 4.26   | 0.262  |
| 60.4    | 81.49  | 70.92   | 12.63 | 1.08  | 0.73  | 1.52       | 5.24   | 0.352  |
| 31.06   | 31     | 31.03   | 3.4   | -1.09 | -0.77 | -1.49      | -2.85  | -0.438 |
| 132.96  | 93.92  | 113.33  | 19.86 | 1.06  | 0.73  | 1.48       | 6.92   | 0.295  |
| 68.93   | 76.17  | 72.57   | 6.38  | 1.22  | 0.99  | 1.49       | 12.88  | 1.567  |
| 47.74   | 41.02  | 44.46   | 3.88  | 1.04  | 0.85  | 1.28       | 1.72   | 0.314  |
| 73.31   | 88.57  | 80.7    | 9.97  | 1.13  | 0.83  | 1.56       | 9.38   | 0.666  |
| 21.15   | 12.13  | 15.7    | 6.36  | 1.16  | 0.35  | 3.6        | 2.15   | 0.26   |
| 83.41   | 17.28  | 50.28   | 33.63 | 2.57  | 0     | 6.71       | 30.73  | 0.902  |
| 393.32  | 375.36 | 382.75  | 14.55 | 1.13  | 0.96  | 1.35       | 43.26  | 1.231  |
| 11.68   | 17.12  | 14.58   | 3.37  | -1.19 | -0.75 | -2.03      | -2.71  | -0.605 |
| 120.17  | 106.41 | 113.34  | 11.66 | 1.01  | 0.82  | 1.23       | 1.26   | 0.091  |
| 121.41  | 80.22  | 100.62  | 21.39 | 1.33  | 0.86  | 1.81       | 24.71  | 1.14   |
| 13.32   | 5.55   | 9.35    | 5.44  | -2.47 | -1.18 | -58.38     | -13.77 | -2.12  |
| 28.01   | 25.5   | 26.36   | 3.26  | 2.65  | 1.54  | 7.28       | 16.4   | 3.262  |
| 14.67   | 20.31  | 17.25   | 4.41  | 1.17  | 0.65  | 1.89       | 2.53   | 0.5    |
| 39.8    | 21.71  | 30.63   | 9.39  | 1.06  | 0.52  | 1.67       | 1.75   | 0.177  |
| 7.52    | 31.01  | 19.45   | 11.84 | 1.07  | 0     | 100000000  | 1.3    | 0.078  |
| 13.4    | 47.86  | 31.13   | 17.82 | -1.52 | -0.75 | -25.98     | -16.25 | -0.862 |
| 6.55    | 15.81  | 11.37   | 5.13  | -1.06 | -0.44 | -4.28      | -0.66  | -0.105 |
| 14.75   | 10.07  | 12.99   | 4.69  | 1.03  | 0.39  | 2.45       | 0.43   | 0.071  |
| 28.36   | 1.84   | 15.12   | 13.44 | 1.8   | 0     | 16.44      | 6.7    | 0.473  |
| 12.17   | 9.22   | 10.54   | 3.01  | -1.39 | -0.76 | -2.81      | -4.13  | -0.922 |
| 210.12  | 232.43 | 222.43  | 14.86 | 1.26  | 0.98  | 1.71       | 45.61  | 1.485  |
| 87.86   | 76.04  | 82.46   | 7.79  | 1.02  | 0.81  | 1.3        | 1.86   | 0.162  |
| 11.57   | 48.39  | 30.14   | 18.54 | -1.09 | -0.49 | -100000000 | -2.74  | -0.14  |
| 37.39   | 26.47  | 32.55   | 8.24  | 1.04  | 0.58  | 1.67       | 1.14   | 0.116  |

|        |        |        |        |        |       |            |         |        |
|--------|--------|--------|--------|--------|-------|------------|---------|--------|
| 690.69 | 491.57 | 590.09 | 109.44 | -1.57  | -1.07 | -2.4       | -338.37 | -1.927 |
| 12.99  | 7.85   | 10.24  | 3.63   | -2.21  | -1.3  | -5.42      | -12.42  | -2.564 |
| 142.7  | 125.48 | 134.22 | 10.21  | -1.02  | -0.87 | -1.2       | -2.39   | -0.178 |
| 4.88   | 7.82   | 6      | 3.94   | -1.03  | 0     | -100000000 | -0.18   | -0.029 |
| 128.83 | 105.25 | 118.95 | 17.72  | -1.29  | -1    | -1.75      | -34.88  | -1.669 |
| 69.03  | 35.19  | 52.24  | 17.48  | -1.3   | -0.81 | -2.93      | -15.89  | -0.853 |
| 159.61 | 160.24 | 159.91 | 14.28  | 1.99   | 1.51  | 2.72       | 79.46   | 4.255  |
| 34.32  | 44.3   | 39.05  | 5.63   | 2.51   | 1.55  | 5.03       | 23.48   | 3.226  |
| 8.81   | 12.45  | 11.16  | 2.94   | 1.46   | 0.5   | 100000000  | 3.54    | 0.485  |
| 22.53  | 25.95  | 24.06  | 4.05   | -2.15  | -1.64 | -3.03      | -27.74  | -5.077 |
| 28.27  | 29.24  | 28.78  | 4.67   | 1.94   | 0.92  | 54.36      | 13.96   | 1.416  |
| 22.9   | 12.44  | 17.47  | 5.62   | -1.03  | -0.62 | -2.25      | -0.6    | -0.097 |
| 26.73  | 28.92  | 27.76  | 2.62   | -1.42  | -1.11 | -1.8       | -11.7   | -2.325 |
| 52.94  | 48.91  | 50.92  | 6.02   | -1.1   | -0.84 | -1.45      | -5.09   | -0.584 |
| 43.03  | 56.17  | 50.92  | 9.27   | 1.46   | 0.94  | 2.24       | 16      | 1.44   |
| 5.81   | 33.52  | 19.64  | 14.08  | 2.6    | 0     | 100000000  | 12.08   | 0.798  |
| 26.26  | 14.67  | 20.45  | 6      | -1.71  | -1.13 | -3.34      | -14.58  | -2.223 |
| 183.88 | 190.85 | 187.33 | 8.93   | 1.07   | 0.92  | 1.27       | 13.02   | 0.762  |
| 166    | 156.51 | 160.56 | 8.24   | -1.09  | -0.69 | -1.51      | -14.62  | -0.367 |
| 27.78  | 34.98  | 31.46  | 4.68   | 1.59   | 1.09  | 2.41       | 11.7    | 1.984  |
| 205.19 | 199.29 | 202.05 | 11.18  | -1.05  | -0.88 | -1.24      | -10.49  | -0.478 |
| 25.99  | 26.03  | 26.01  | 3.4    | -1.38  | -1.04 | -1.85      | -9.89   | -1.886 |
| 57.31  | 40.97  | 48.93  | 8.8    | 1.09   | 0.75  | 1.49       | 4.24    | 0.435  |
| 3.48   | 21.13  | 12.55  | 9.14   | 1.89   | 0     | 100000000  | 5.91    | 0.535  |
| 5.64   | 65.29  | 35.69  | 29.9   | 1.59   | 0     | 4.27       | 13.2    | 0.435  |
| 15.19  | 21.17  | 18.35  | 3.63   | 1.53   | 0.9   | 2.8        | 6.33    | 1.333  |
| 10.28  | 2.9    | 6.09   | 4.7    | -1.86  | -0.61 | -100000000 | -5.25   | -0.883 |
| 2.47   | 1      | 1.64   | 3.36   | -17.97 | 0     | -100000000 | -27.8   | -1.207 |
| 41.14  | 33.86  | 37.46  | 7.42   | -1.16  | -0.82 | -1.78      | -5.99   | -0.674 |
| 32.08  | 32.19  | 32.13  | 2.77   | -1.11  | -0.92 | -1.35      | -3.56   | -0.908 |
| 38.87  | 17.83  | 28.54  | 12.3   | -1.82  | -1.04 | -6.28      | -23.31  | -1.775 |
| 9.81   | 19.18  | 14.59  | 5.09   | 1.85   | 0.61  | 100000000  | 6.71    | 0.941  |
| 19.36  | 10.1   | 14.08  | 6.47   | -1.94  | -0.73 | -8.34      | -13.26  | -1.175 |
| 43.81  | 43.98  | 43.93  | 2.6    | 2.06   | 1.53  | 3.07       | 22.57   | 4.578  |
| 29.02  | 28.21  | 28.47  | 2.67   | 6.58   | 2.66  | 100000000  | 24.14   | 5.258  |
| 58.18  | 62.01  | 60.13  | 6.22   | -1.06  | -0.89 | -1.28      | -3.46   | -0.522 |

|        |        |        |       |       |       |           |        |        |
|--------|--------|--------|-------|-------|-------|-----------|--------|--------|
| 19.29  | 15.9   | 17.91  | 4.18  | 1.25  | 0.69  | 2.31      | 3.53   | 0.64   |
| 27.96  | 34.48  | 30.72  | 4.17  | -1.37 | -1.08 | -1.8      | -11.28 | -2.17  |
| 50.14  | 60.53  | 56.1   | 6.23  | -1.05 | -0.83 | -1.34     | -2.63  | -0.32  |
| 577.82 | 465.83 | 520.06 | 59.73 | -1.31 | -0.94 | -1.77     | -160.8 | -1.359 |
| 23.07  | 2.26   | 12.98  | 11.22 | 1.29  | 0     | 100000000 | 2.93   | 0.2    |
| 31.24  | 20.96  | 25.9   | 9.55  | 1.54  | 0.55  | 4.02      | 9.08   | 0.811  |
| 35.41  | 25.49  | 30.7   | 5.51  | 1.02  | 0.63  | 1.73      | 0.46   | 0.052  |
| 15.65  | 9.04   | 12.41  | 4.05  | 1.16  | 0.49  | 2.51      | 1.68   | 0.327  |
| 15.19  | 35.97  | 25.46  | 11.03 | 1.18  | 0.32  | 2.86      | 3.82   | 0.296  |
| 11.5   | 7.65   | 9.72   | 6.51  | 1.75  | 0     | 10.73     | 4.17   | 0.591  |
| 633.16 | 570.73 | 602.02 | 32.74 | 1.1   | 0.94  | 1.31      | 57.17  | 1.005  |
| 40.37  | 23.06  | 31.48  | 9.91  | 1.15  | 0.55  | 1.84      | 4.18   | 0.403  |
| 38.37  | 38.04  | 38.2   | 1.44  | 1.34  | 1.06  | 1.8       | 9.69   | 2.094  |
| 17.33  | 12.95  | 14.66  | 5.02  | -2.22 | -1.26 | -5.24     | -17.87 | -2.339 |
| 47.29  | 61.16  | 53.81  | 7.41  | -1.03 | -0.82 | -1.36     | -1.88  | -0.229 |
| 7.89   | 10.99  | 9.66   | 3.93  | 1.22  | 0.37  | 4.04      | 1.72   | 0.339  |
| 21.62  | 26     | 24.45  | 4.96  | 6.15  | 2.21  | 100000000 | 20.47  | 3.312  |
| 34.13  | 32.55  | 33.45  | 3.53  | 2.94  | 1.72  | 8.27      | 22.08  | 3.891  |
| 35.79  | 22.89  | 29.15  | 7.6   | 1.33  | 0.74  | 2.08      | 7.28   | 0.888  |
| 42.12  | 13.77  | 28.28  | 14.69 | -1.24 | -0.65 | -8.55     | -6.8   | -0.453 |
| 18.26  | 8.31   | 13.76  | 5.8   | -1.35 | -0.64 | -4.57     | -4.84  | -0.648 |
| 11.7   | 39.54  | 25.55  | 14.05 | 1.66  | 0.16  | 4.47      | 10.13  | 0.68   |
| 71.68  | 82.9   | 78.02  | 8.25  | 1.3   | 1.04  | 1.6       | 18.16  | 1.941  |
| 48.77  | 43.72  | 46.63  | 4.08  | -1.02 | -0.86 | -1.22     | -0.86  | -0.174 |
| 27.45  | 16.76  | 22.14  | 6.14  | -1.36 | -0.85 | -2.6      | -8.03  | -1.046 |
| 1.82   | 7.41   | 4.93   | 3.26  | 2.76  | 0     | 100000000 | 3.15   | 0.881  |
| 173.96 | 161.68 | 166.54 | 11.21 | 1.15  | 0.96  | 1.4       | 21.66  | 1.24   |
| 359.84 | 395.62 | 380.32 | 23.07 | 1.3   | 1.03  | 1.72      | 88.51  | 1.877  |

| P value  | filtered | DMSO A112 | DMSO B112 | baseline mea | baseline mea | BKM120 A112 | BKM120 B112 | experiment m |
|----------|----------|-----------|-----------|--------------|--------------|-------------|-------------|--------------|
| 0.304251 |          | 144       | 155.64    | 150.86       | 10.6         | 121.12      | 100.64      | 111.01       |
| 0.354963 |          | 411.02    | 454.38    | 432.56       | 22.89        | 254.74      | 168.57      | 210.94       |
| 0.618377 |          | 279.09    | 418.78    | 348.58       | 70.42        | 871.08      | 848.99      | 858.76       |
| 0.224482 |          | 196.47    | 206.1     | 200.89       | 11.7         | 110.08      | 96.02       | 103          |
| 0.697057 |          | 1431.11   | 1931.77   | 1680.55      | 250.85       | 1295.49     | 642.27      | 968.92       |
| 0.141869 |          | 382.96    | 420.79    | 402.02       | 20.68        | 287.25      | 203.32      | 245.38       |
| 0.465766 |          | 1202.32   | 1032.23   | 1115.94      | 92.39        | 1067.79     | 1442.59     | 1254.59      |
| 0.251953 |          | 1583.6    | 1188      | 1384.84      | 202.03       | 1491.9      | 2057.36     | 1774.78      |
| 0.190674 |          | 1055.22   | 861.14    | 958.08       | 101.58       | 1121.7      | 1594.94     | 1358.1       |
| 0.258427 |          | 2686.87   | 2066.14   | 2375.63      | 317.87       | 2564.77     | 3588.07     | 3074.36      |
| 0.615323 |          | 1664.42   | 1714.92   | 1692.83      | 73.32        | 2714.28     | 3108.5      | 2917.01      |
| 0.778891 |          | 268.4     | 237.43    | 252.14       | 21.2         | 269.72      | 381.77      | 325.21       |
| 0.581262 |          | 18.63     | 23.72     | 20.7         | 7.81         | 16.21       | 21.84       | 19.32        |
| 0.787473 |          | 691.97    | 735.45    | 712.25       | 29.25        | 693.3       | 504.21      | 598.72       |
| 0.994617 |          | 855.9     | 964.89    | 912.03       | 55.98        | 892.24      | 678.66      | 785.17       |
| 0.75254  |          | 2397.42   | 2823.86   | 2606.43      | 218.68       | 2582.4      | 1980.69     | 2269.09      |
| 0.473257 |          | 126.56    | 125.9     | 126.16       | 9.4          | 82.22       | 45.82       | 63.27        |
| 0.205177 |          | 480.09    | 406.15    | 442.96       | 40.73        | 585.1       | 867.35      | 726.2        |

|          |         |         |         |        |         |         |         |
|----------|---------|---------|---------|--------|---------|---------|---------|
| 0.913259 | 16.49   | 12.46   | 14.51   | 4.22   | 14.16   | 8.92    | 11.37   |
| 0.888782 | 369.43  | 398.42  | 382.06  | 17.07  | 272.74  | 215.33  | 243.65  |
| 0.377442 | 19.74   | 17.14   | 18.58   | 4.44   | 14.88   | 10.44   | 12.58   |
| 0.753144 | 31.49   | 37.81   | 34.35   | 22.86  | 22.61   | 15.38   | 17.64   |
| 0.326172 | 157.88  | 195.2   | 176.66  | 20.91  | 169.11  | 146.33  | 157.71  |
| 0.479593 | 84.9    | 79.12   | 82.35   | 8.71   | 69.94   | 56      | 61.64   |
| 0.939651 | 1185.82 | 1295.69 | 1237.17 | 61.92  | 1533.81 | 1454.23 | 1495.95 |
| 0.482935 | 116.38  | 128     | 121.93  | 15.73  | 71.53   | 69.23   | 70.32   |
| 0.406394 | 761.49  | 618.88  | 688.66  | 77.15  | 666.81  | 669.42  | 668.23  |
| 0.820527 | 485.79  | 582.41  | 534.35  | 49.22  | 532.51  | 306.52  | 419.36  |
| 0.494604 | 420.33  | 397.34  | 408.67  | 16.21  | 403.07  | 362.27  | 381.79  |
| 0.90848  | 917.02  | 815.34  | 865.81  | 54.2   | 837.19  | 1045.16 | 940.8   |
| 0.476248 | 338.89  | 369.01  | 354.46  | 20.42  | 388.69  | 316.8   | 353.43  |
| 0.450845 | 1823.93 | 1760.57 | 1789.87 | 53.05  | 1949.09 | 1539.36 | 1738.16 |
| 0.916254 | 110.44  | 121.88  | 115.74  | 8.51   | 187.72  | 101.47  | 144.68  |
| 0.90525  | 599.2   | 565.49  | 582.82  | 26.74  | 580.13  | 458.68  | 517.66  |
| 0.874946 | 6.26    | 6.54    | 6.41    | 5.92   | 6.58    | 10.29   | 8.26    |
| 0.931848 | 118.86  | 94.07   | 106.35  | 19.17  | 47.26   | 60.98   | 54.35   |
| 0.606677 | 141.09  | 119.9   | 131.22  | 27.7   | 80.16   | 71      | 75.75   |
| 0.695794 | 59.11   | 75.7    | 66.2    | 12.37  | 72.26   | 66.42   | 69.06   |
| 0.396586 | 324.35  | 306.55  | 314.77  | 22.47  | 471.47  | 383.24  | 426.88  |
| 0.79392  | 33.81   | 34.38   | 34.09   | 6.68   | 33.29   | 34.85   | 33.92   |
| 0.564762 | 7.69    | 30.57   | 19.48   | 11.63  | 12.16   | 12.3    | 12.2    |
| 0.814288 | 53.44   | 71.75   | 61.99   | 12.03  | 101.96  | 63.48   | 83.02   |
| 0.957492 | 767.79  | 760.41  | 764.63  | 21.96  | 631.59  | 559.57  | 596.22  |
| 0.908629 | 859.84  | 878.66  | 870.31  | 20.86  | 857.32  | 870.55  | 866.88  |
| 0.828949 | 20.58   | 13.41   | 17.14   | 7.24   | 19.1    | 19.35   | 19.23   |
| 0.821666 | 28.08   | 51.02   | 39.35   | 11.76  | 97.25   | 31.08   | 64.16   |
| 0.428751 | 907.15  | 1134.98 | 1020.2  | 114.79 | 1030.27 | 464.45  | 747.08  |
| 0.200559 | 72.79   | 67.53   | 70.27   | 5.68   | 67.39   | 51.74   | 60      |
| 0.648762 | 1719.01 | 2107.74 | 1912.69 | 194.88 | 2080.8  | 1629.54 | 1854.43 |
| 0.865521 | 38.97   | 44.31   | 41.47   | 10.02  | 41.4    | 26.96   | 33.78   |
| 0.660782 | 118.82  | 173.45  | 146.03  | 27.77  | 153.44  | 125.41  | 138.91  |
| 0.692607 | 299.87  | 337.38  | 318.47  | 21.65  | 281.76  | 180.9   | 230.53  |
| 0.69795  | 295.05  | 303.45  | 298.23  | 10.06  | 275.39  | 144.89  | 210     |
| 0.329684 | 325.72  | 341.68  | 332.53  | 13.09  | 243.07  | 244.78  | 243.93  |

|          |         |         |         |        |         |         |         |
|----------|---------|---------|---------|--------|---------|---------|---------|
| 0.690984 | 144.82  | 131.86  | 137.73  | 11.77  | 189.98  | 224.27  | 204.24  |
| 0.146457 | 5726.18 | 6093.59 | 5906.61 | 199.03 | 5457.28 | 4627.67 | 5030.36 |
| 0.575525 | 163.56  | 158.9   | 161.11  | 10.5   | 139.11  | 109.32  | 123.84  |
| 0.41528  | 237.3   | 189.9   | 212.2   | 27.07  | 285.53  | 347.52  | 317.24  |
| 0.806222 | 107.97  | 112.56  | 110.14  | 7.82   | 60.34   | 65.04   | 62.7    |
| 0.579785 | 350.55  | 369.26  | 358.5   | 34.75  | 285.96  | 301.26  | 293.66  |
| 0.957291 | 368.05  | 392.86  | 381.85  | 36.85  | 305.45  | 290.14  | 298.01  |
| 0.82478  | 112.46  | 95.28   | 104.36  | 10     | 98.05   | 100.01  | 99.16   |
| 0.971539 | 4.22    | 4.56    | 4.46    | 2.61   | 5.83    | 2.51    | 3.62    |
| 0.991428 | 718.15  | 791.04  | 751.97  | 42.42  | 752.81  | 388.98  | 570.73  |
| 0.751752 | 34.34   | 21.82   | 29.34   | 10.57  | 22.46   | 23.6    | 22.99   |
| 0.787926 | 2634.42 | 3479.68 | 3057.44 | 422.83 | 3474.22 | 2821.33 | 3146.65 |
| 0.916826 | 576.19  | 681.8   | 627.86  | 54.53  | 715.58  | 557.26  | 635.42  |
| 0.70839  | 15.17   | 22.95   | 18.72   | 8.76   | 19.09   | 16.51   | 17.81   |
| 0.880308 | 84.71   | 107.52  | 95.88   | 13.93  | 92.95   | 27.33   | 60.13   |
| 0.919637 | 31.02   | 45.34   | 37.19   | 9.01   | 28.53   | 41.13   | 34.66   |
| 0.494864 | 261.61  | 309.71  | 285.74  | 28.44  | 285.56  | 225.06  | 256.68  |
| 0.954735 | 4.34    | 4.92    | 4.64    | 5.56   | 6.14    | 6.37    | 6.22    |
| 0.923081 | 2080.75 | 2277.54 | 2172.6  | 106.1  | 2513.94 | 2048.22 | 2276.42 |
| 0.438828 | 18.37   | 20.09   | 18.96   | 3.9    | 28.31   | 11.96   | 20.02   |
| 0.932653 | 12.17   | 9.18    | 10.58   | 4.65   | 9.84    | 12.72   | 11.02   |
| 0.861062 | 25.69   | 32.62   | 28.12   | 6.68   | 30.24   | 29.39   | 29.76   |
| 0.15016  | 327.87  | 330.21  | 329.16  | 10.48  | 369.42  | 459.64  | 414.73  |
| 0.742681 | 22.49   | 25.95   | 23.96   | 5.28   | 29.61   | 8.15    | 18.21   |
| 0.662166 | 96.95   | 109.57  | 103.31  | 8.4    | 125.34  | 108.87  | 117.65  |
| 0.776762 | 327.12  | 393.78  | 359.96  | 34.17  | 444.09  | 281.87  | 362.92  |
| 0.537083 | 45.01   | 18.28   | 32.34   | 14.58  | 24.79   | 41.28   | 32.66   |
| 0.141983 | 167.47  | 158.02  | 162.33  | 9.6    | 125.66  | 127.89  | 126.67  |
| 0.63618  | 36.71   | 20.44   | 28.36   | 8.98   | 12.69   | 18.29   | 15.63   |
| 0.289284 | 292.37  | 322.26  | 306.67  | 21.48  | 236.53  | 189.53  | 214.32  |
| 0.779855 | 18.01   | 17.76   | 17.93   | 2.78   | 30.62   | 15.04   | 22.89   |
| 0.299367 | 76.02   | 62.48   | 68.71   | 8.37   | 74.32   | 96.25   | 84.97   |
| 0.490371 | 6.31    | 11.14   | 8.84    | 3.76   | 12.52   | 23.04   | 18.84   |
| 0.452604 | 42.07   | 53.74   | 47.84   | 7.05   | 55.34   | 30.45   | 43.06   |
| 0.762889 | 18.23   | 4.31    | 10.99   | 7.63   | 9.23    | 9.58    | 9.4     |
| 0.853468 | 21.37   | 13.12   | 16.82   | 6.91   | 8.92    | 15.21   | 11.79   |

|          |          |          |          |        |          |          |          |
|----------|----------|----------|----------|--------|----------|----------|----------|
| 0.14512  | 620.26   | 609.02   | 614.33   | 18.49  | 728      | 719.96   | 725.3    |
| 0.823705 | 102.74   | 134      | 118.47   | 20.87  | 111.1    | 72.22    | 91.89    |
| 0.671585 | 1342.88  | 1828.37  | 1585.85  | 243.03 | 1803.45  | 1371.67  | 1585.61  |
| 0.980871 | 909.22   | 930.09   | 919.07   | 40.52  | 863.26   | 872.05   | 868.46   |
| 0.674384 | 678.62   | 922.04   | 796.66   | 130.9  | 864.8    | 522.24   | 692.17   |
| 0.211211 | 651.98   | 661.83   | 657.97   | 18.19  | 534.75   | 742.12   | 638.13   |
| 0.790519 | 519.37   | 431.89   | 477.26   | 48.6   | 392.77   | 538.77   | 465.62   |
| 0.749681 | 890.43   | 1025.44  | 958.41   | 70.55  | 1080.82  | 1095.3   | 1086.06  |
| 0.178667 | 158.36   | 150.52   | 154.38   | 8.6    | 149.2    | 115.78   | 131.93   |
| 0.911735 | 672.15   | 1312.28  | 991.05   | 320.76 | 2012.54  | 1931.89  | 1971.76  |
| 0.142856 | 762.64   | 802.23   | 781.88   | 27.14  | 690.89   | 524.72   | 607.27   |
| 0.251889 | 299.92   | 381.84   | 340.54   | 42.36  | 286.1    | 197.23   | 241.46   |
| 0.407985 | 1013.4   | 924.95   | 970.26   | 48.95  | 1070.09  | 1364.08  | 1215.61  |
| 0.904366 | 1921.5   | 1688.22  | 1803.7   | 121.65 | 1632.9   | 1332.91  | 1479.55  |
| 0.698544 | 14.59    | 22.13    | 18.92    | 7.7    | 11.47    | 13.48    | 12.39    |
| 0.94292  | 20       | 21.31    | 20.53    | 6.19   | 6.39     | 11.24    | 7.94     |
| 0.809907 | 11.93    | 20.86    | 16.62    | 7.26   | 8.48     | 13.24    | 10.43    |
| 0.950598 | 22.95    | 15.57    | 19.4     | 12.61  | 24.9     | 14.88    | 19.57    |
| 0.237112 | 273.29   | 307.75   | 292.99   | 20.45  | 223.31   | 184.45   | 201.64   |
| 0.085411 | 850.65   | 896.47   | 872.37   | 25.14  | 887.16   | 692.73   | 789.5    |
| 0.777883 | 8.75     | 9.38     | 9.06     | 6.32   | 5.51     | 12.67    | 9.58     |
| 0.162437 | 12990.22 | 13194.96 | 13088.63 | 183.47 | 14784.13 | 13316.42 | 14045.53 |
| 0.266101 | 9.54     | 15.61    | 12.32    | 4.66   | 34.67    | 14.43    | 24.48    |
| 0.519394 | 24.43    | 18.61    | 21.53    | 4.34   | 22.89    | 24.13    | 23.45    |
| 0.918421 | 43.68    | 37.79    | 41.68    | 7.86   | 52.9     | 34.4     | 43.16    |
| 0.303247 | 57.26    | 61.43    | 59.68    | 5.12   | 50.51    | 64.42    | 57.12    |
| 0.653588 | 6.61     | 14.24    | 10.23    | 5.12   | 6.2      | 9.54     | 7.77     |
| 0.821383 | 45.54    | 75.33    | 59.84    | 15.69  | 24.49    | 18.71    | 21.14    |
| 0.609405 | 60.02    | 59.57    | 59.84    | 4.94   | 58.67    | 53.88    | 56.34    |
| 0.991802 | 12.06    | 48.54    | 30.28    | 18.32  | 32.19    | 16.42    | 25.09    |
| 0.253621 | 187.71   | 188.79   | 188.22   | 8.35   | 170.58   | 177.82   | 173.67   |
| 0.164631 | 616.11   | 584.3    | 600.71   | 22.41  | 626.12   | 698.83   | 661.92   |
| 0.67607  | 18.91    | 21.44    | 19.95    | 3.86   | 15.26    | 13.59    | 14.51    |
| 0.975295 | 159.9    | 138.2    | 149.99   | 13.14  | 148.34   | 193.56   | 171.06   |
| 0.064821 | 1581.06  | 1646.39  | 1611.9   | 55.12  | 1902.05  | 1864.57  | 1881.1   |
| 0.786327 | 21.76    | 29.8     | 25.51    | 5.07   | 11.1     | 20.62    | 16.05    |



|          |         |         |         |        |         |         |         |
|----------|---------|---------|---------|--------|---------|---------|---------|
| 0.873069 | 31.23   | 36.62   | 33.93   | 11.33  | 26.48   | 17.2    | 21.91   |
| 0.952859 | 17.6    | 26.56   | 21.83   | 8.02   | 12.86   | 15.19   | 14.45   |
| 0.774145 | 1961.77 | 1729.67 | 1843.03 | 122.96 | 1666.41 | 1374.05 | 1521.6  |
| 0.160399 | 6721.7  | 6733.48 | 6724.93 | 96.14  | 7423.39 | 6180.16 | 6779.41 |
| 0.383407 | 186.15  | 175.01  | 181.37  | 10.5   | 183.22  | 138.68  | 160.61  |
| 0.361509 | 420     | 385.09  | 403     | 20.27  | 439.18  | 447.38  | 444     |
| 0.812568 | 443.38  | 481.72  | 462.04  | 26.45  | 638     | 721.08  | 679.3   |
| 0.061302 | 1269.21 | 1343.75 | 1300.75 | 45.15  | 1539.02 | 1565.55 | 1552.16 |
| 0.364611 | 1919.09 | 1934.05 | 1924.43 | 18.81  | 1929.7  | 2323.89 | 2127.12 |
| 0.162353 | 129.55  | 156.93  | 143.22  | 16.27  | 202.24  | 162.24  | 182.85  |
| 0.926877 | 614.77  | 540.76  | 578.33  | 57.01  | 582.26  | 587.61  | 585.34  |
| 0.440358 | 829.1   | 1142.06 | 984.69  | 157.13 | 1313.27 | 1159.01 | 1237.67 |
| 0.90456  | 297.81  | 362.36  | 329.55  | 32.79  | 229.78  | 243.94  | 236.88  |
| 0.297001 | 332.15  | 357.6   | 345.51  | 16.09  | 273.31  | 219.87  | 247.44  |
| 0.571572 | 593.68  | 705.65  | 648.36  | 58.02  | 912.3   | 663.2   | 787.44  |
| 0.641319 | 42.34   | 42.41   | 42.37   | 7.27   | 49.6    | 39.97   | 44.43   |
| 0.81362  | 223.38  | 226.41  | 224.77  | 8.69   | 298.71  | 301.19  | 299.62  |
| 0.698343 | 16.88   | 25.73   | 20.2    | 7.97   | 20.36   | 10.27   | 14.67   |
| 0.836084 | 3.47    | 4.79    | 4.01    | 2.76   | 3.27    | 6.8     | 4.95    |
| 1        | 1       | 1       | 1       | 1.16   | 5.45    | 1.16    | 3.49    |
| 0.401897 | 223.25  | 232.56  | 229.02  | 11.41  | 174.74  | 106.02  | 140.81  |
| 0.878733 | 23.14   | 35.61   | 28.98   | 8.53   | 39.59   | 21.98   | 30.33   |
| 0.883175 | 68.11   | 77.84   | 73.68   | 10.13  | 104.86  | 104.73  | 104.81  |
| 0.138636 | 109.09  | 107.92  | 108.43  | 4.24   | 72.28   | 100.12  | 86.19   |
| 0.35607  | 32.6    | 24.8    | 28.23   | 6.11   | 44.1    | 38.11   | 40.23   |
| 0.684129 | 11.62   | 27      | 19.4    | 7.96   | 10.63   | 4.26    | 7.74    |
| 0.751623 | 161.22  | 169.05  | 165.09  | 9.84   | 146.5   | 117.7   | 131.68  |
| 0.189608 | 375.06  | 401.38  | 386.25  | 17     | 531.44  | 582.18  | 558.39  |
| 0.409571 | 2417.09 | 2673.46 | 2540.02 | 134.81 | 2849.38 | 2323.76 | 2579.96 |
| 0.672679 | 2.22    | 4.89    | 3.45    | 2.57   | 16.07   | 20.61   | 18.25   |
| 0.065518 | 1054.03 | 998.61  | 1027.16 | 32.69  | 813.36  | 990.5   | 901.22  |
| 0.181455 | 16.71   | 12.53   | 14.98   | 4.5    | 19.7    | 34.53   | 27.14   |
| 0.486674 | 52.75   | 63.98   | 58.87   | 8.62   | 9.6     | 39.43   | 24.47   |
| 0.965195 | 37.29   | 50.11   | 44.47   | 7.78   | 15.31   | 42.95   | 29.09   |
| 0.220034 | 21.45   | 17.54   | 19.49   | 3.74   | 8.65    | 8.89    | 8.75    |
| 0.272157 | 1144.65 | 1056.77 | 1099.22 | 52.52  | 1118.18 | 1540.36 | 1327.21 |

|          |         |         |         |       |         |         |         |
|----------|---------|---------|---------|-------|---------|---------|---------|
| 0.534269 | 6.79    | 41.05   | 24.32   | 17.44 | 19.01   | 32.79   | 26.09   |
| 0.282491 | 627.74  | 534.11  | 579.47  | 52.02 | 537.99  | 596.7   | 569.17  |
| 0.663177 | 39.58   | 18.47   | 28.54   | 11.79 | 25.04   | 13.71   | 19.21   |
| 0.855102 | 23.31   | 36.05   | 29.46   | 7.16  | 43.82   | 36.77   | 40.52   |
| 0.955622 | 155.5   | 168.78  | 162.11  | 7.79  | 123.35  | 116.71  | 119.51  |
| 0.528532 | 27.86   | 39.23   | 33.48   | 6.42  | 46      | 52.09   | 49.3    |
| 0.570464 | 474.81  | 505.49  | 487.81  | 18.05 | 348.01  | 300.04  | 324.1   |
| 0.180418 | 4653.05 | 4597.43 | 4632.81 | 95.49 | 4278.91 | 3989.06 | 4127.37 |
| 0.997506 | 48.57   | 41.25   | 45.29   | 7.22  | 23.32   | 40.03   | 31.24   |
| 0.382101 | 55.38   | 129.27  | 93.18   | 38.21 | 158.35  | 127.3   | 142.93  |
| 0.845217 | 1378.88 | 1522.22 | 1446.02 | 80.96 | 1208.7  | 1034.72 | 1120.76 |
| 0.211111 | 372.53  | 442.91  | 406.68  | 37.43 | 513.41  | 337.29  | 425.6   |
| 0.207285 | 43.1    | 46.83   | 44.81   | 7.84  | 35.19   | 65.09   | 49.5    |
| 0.444279 | 196.07  | 232.59  | 213.65  | 19.99 | 270.7   | 254.11  | 261.64  |
| 0.458277 | 650.58  | 517.07  | 583.31  | 68.26 | 556.66  | 757.67  | 657.04  |
| 0.831405 | 32.18   | 62.59   | 47.35   | 16.56 | 45.07   | 32.52   | 37.67   |
| 0.542766 | 559.76  | 537.71  | 549.36  | 16.89 | 548.83  | 480.35  | 513.88  |
| 0.800152 | 2.77    | 1       | 1.88    | 1.95  | 2.28    | 3.94    | 2.84    |
| 0.919246 | 117.16  | 116.52  | 116.94  | 10.21 | 115.89  | 86.61   | 102.26  |
| 0.674368 | 3.11    | 20.12   | 11.45   | 8.7   | 5.29    | 6.52    | 5.88    |
| 0.458578 | 71.84   | 68.34   | 70.3    | 10.01 | 33.44   | 35.11   | 34.34   |
| 0.821885 | 162.05  | 168.22  | 164.82  | 7.19  | 180.96  | 146.8   | 163.41  |
| 0.344421 | 1082.62 | 1145.34 | 1113.65 | 41.65 | 1349.49 | 1452.33 | 1404.78 |
| 0.449127 | 967.36  | 1122.94 | 1043.79 | 79.71 | 1001.03 | 752.38  | 876.37  |
| 0.744378 | 59.5    | 39.43   | 48.92   | 12.38 | 46.37   | 57.08   | 52.76   |
| 0.433225 | 532.29  | 663.81  | 597.43  | 67.36 | 712.14  | 518.6   | 613.26  |
| 0.316118 | 185.81  | 204.86  | 194.74  | 13.64 | 229.55  | 164.24  | 197.14  |
| 0.838558 | 73.7    | 53.47   | 63.4    | 13.88 | 56.9    | 63.32   | 60.39   |
| 0.539332 | 629.76  | 565.89  | 597.65  | 35.55 | 652.6   | 853.19  | 752.73  |
| 0.497195 | 190.69  | 223.34  | 207.45  | 16.95 | 214.09  | 145.46  | 179.6   |
| 0.806095 | 15.47   | 8.65    | 12.59   | 4.3   | 8.57    | 22.89   | 15.77   |
| 0.918133 | 3.29    | 3.65    | 3.45    | 2.47  | 1.03    | 2.76    | 1.57    |
| 0.9026   | 69.46   | 83.81   | 77.33   | 8.76  | 99.1    | 73.23   | 85.83   |
| 0.835986 | 15.41   | 10.05   | 12.09   | 5.63  | 6.28    | 16.32   | 11.34   |
| 0.699627 | 851.1   | 862.31  | 855.56  | 14.43 | 745.35  | 692.93  | 721.71  |
| 0.756599 | 90.24   | 71.75   | 80.58   | 12.65 | 79.49   | 137.09  | 108.83  |

|          |         |         |         |       |         |         |         |
|----------|---------|---------|---------|-------|---------|---------|---------|
| 0.71225  | 6.13    | 1       | 3       | 3.55  | 6.32    | 7.48    | 6.73    |
| 0.876693 | 20.22   | 8.45    | 14.23   | 7.3   | 9.65    | 18.49   | 13.4    |
| 0.856586 | 512.86  | 697.22  | 603.58  | 93.53 | 404.03  | 312.61  | 358.75  |
| 0.689569 | 25.8    | 23.47   | 24.5    | 5.7   | 25.14   | 22.11   | 23.68   |
| 0.646307 | 91.71   | 112.16  | 101.77  | 12.28 | 131.68  | 94.2    | 113.7   |
| 0.572355 | 59.47   | 58.84   | 59.15   | 4.96  | 40.69   | 70.08   | 55.24   |
| 0.538154 | 261.56  | 281.74  | 272.14  | 12.76 | 210.55  | 142     | 176.86  |
| 0.61372  | 9.21    | 7.57    | 8.35    | 1.82  | 8.72    | 7.69    | 8.24    |
| 0.857825 | 3003.23 | 2867.65 | 2937.57 | 81.03 | 2522.94 | 2827.4  | 2675.21 |
| 0.392272 | 74.25   | 54.51   | 64.28   | 12.21 | 54.12   | 113.15  | 83.8    |
| 0.50613  | 91.12   | 62.6    | 76.82   | 15.18 | 86.31   | 155.47  | 120.27  |
| 0.688348 | 197.29  | 211.62  | 205.37  | 9.69  | 355.51  | 260.92  | 307.69  |
| 0.978503 | 85.74   | 77.84   | 81.94   | 11.68 | 101.64  | 141.7   | 121.81  |
| 0.971096 | 35.64   | 42.66   | 39.08   | 6.07  | 32.57   | 38.41   | 34.61   |
| 0.481339 | 30.79   | 39.86   | 35.63   | 6.51  | 31.61   | 29.85   | 30.72   |
| 0.350039 | 200.08  | 254.76  | 227.01  | 28.05 | 200.94  | 112.93  | 156.43  |
| 0.747592 | 96.42   | 115.98  | 105.78  | 12.32 | 27.45   | 61.83   | 44.59   |
| 0.377509 | 327.32  | 353.17  | 341.18  | 14.32 | 300.11  | 307.8   | 302.73  |
| 0.469131 | 839.18  | 968.61  | 904.98  | 68.48 | 937.39  | 757.66  | 841.47  |
| 0.168266 | 86.07   | 79.47   | 83.54   | 6.39  | 59.51   | 50.35   | 55.46   |
| 0.922914 | 440.29  | 470.4   | 455.14  | 16.11 | 444.32  | 335.92  | 390.04  |
| 0.958442 | 21.71   | 34.85   | 28      | 8.22  | 21.39   | 16.94   | 19.36   |
| 0.07499  | 255.39  | 259.87  | 257.1   | 8.13  | 222.4   | 176.94  | 199.82  |
| 0.650874 | 23.4    | 39.27   | 30.19   | 9.71  | 32.59   | 42.2    | 37.43   |
| 0.224827 | 99.88   | 79.55   | 89.26   | 11.57 | 81.69   | 78.75   | 80.21   |
| 0.292324 | 939.79  | 1059.51 | 998.24  | 63.05 | 1790.47 | 2072.51 | 1931.78 |
| 0.183146 | 407.11  | 408.78  | 407.74  | 7.26  | 189.89  | 193.49  | 192.39  |
| 0.188334 | 24.74   | 24.67   | 24.7    | 3.83  | 8.14    | 48.68   | 28.52   |
| 0.047769 | 274.81  | 305.59  | 290.97  | 17.21 | 495.34  | 433.48  | 463.98  |
| 0.122465 | 387.28  | 376.42  | 380.71  | 14.45 | 402.1   | 427.16  | 413.27  |
| 0.100474 | 601.16  | 612.26  | 606.68  | 18.58 | 737.98  | 725.8   | 732.99  |
| 0.217971 | 2453.13 | 2466.65 | 2461.35 | 50.57 | 1657.85 | 1252.28 | 1454.52 |
| 0.094669 | 199.23  | 219.81  | 209.26  | 13.16 | 104.33  | 95.35   | 100.33  |
| 0.424714 | 17.4    | 19.3    | 18.36   | 6.59  | 41.36   | 36.68   | 38.87   |
| 0.10816  | 500.37  | 477.36  | 490.61  | 18.42 | 342.98  | 308.04  | 325.06  |
| 0.513275 | 130.41  | 141.7   | 135.97  | 6.31  | 82.79   | 57.2    | 70.34   |

|            |         |         |         |        |         |         |         |
|------------|---------|---------|---------|--------|---------|---------|---------|
| 0.343937   | 504.53  | 683.44  | 593.44  | 90.18  | 1568.83 | 1421.95 | 1495.76 |
| 0.087737 * | 8.72    | 15.11   | 11.13   | 5.63   | 16.26   | 32.48   | 24.46   |
| 0.687738   | 19.36   | 14.84   | 16.49   | 4.4    | 17.37   | 22.14   | 19.29   |
| 0.189468   | 419.05  | 478.33  | 447.41  | 33.05  | 322.78  | 265.01  | 292.38  |
| 0.334621   | 36.39   | 36.5    | 36.43   | 1.6    | 16.8    | 4.76    | 10.88   |
| 0.237494   | 945.09  | 947.07  | 945.78  | 27.51  | 1417.24 | 1140.3  | 1277.36 |
| 0.234417   | 692.29  | 835.57  | 764.01  | 74.13  | 1290.53 | 1362.51 | 1327.84 |
| 0.665546   | 823.33  | 1034.34 | 928.43  | 108.46 | 737.94  | 566.92  | 651.78  |
| 0.143931   | 583.75  | 608.72  | 600.16  | 24.22  | 710.92  | 828.33  | 762.83  |
| 0.555465   | 8.73    | 13.29   | 10.67   | 3.29   | 8.39    | 14.82   | 11.42   |
| 0.625692   | 87.05   | 102.28  | 94.27   | 11.26  | 74.21   | 84.08   | 79      |
| 0.053213   | 189.43  | 190.41  | 189.79  | 8.01   | 144.68  | 113.06  | 129.31  |
| 0.537995   | 112.87  | 97.7    | 107.08  | 10.99  | 192.61  | 146.32  | 169.92  |
| 0.222786   | 29.58   | 28.22   | 28.77   | 3.19   | 20.67   | 8.43    | 14.76   |
| 0.338135   | 16.55   | 22.23   | 19.34   | 4.12   | 26.55   | 38.38   | 32.26   |
| 0.203744   | 8543.35 | 8251.6  | 8404.87 | 243.7  | 5001.11 | 3578.09 | 4285.66 |
| 0.08438    | 1031.71 | 1125.5  | 1076.71 | 52.3   | 941.47  | 914.29  | 928.87  |
| 0.760216   | 36.65   | 45.03   | 40.43   | 6.21   | 36.06   | 36.83   | 36.42   |
| 0.196449   | 769.6   | 869.48  | 816.97  | 54.26  | 663.52  | 495.83  | 577.81  |
| 0.236064   | 28.95   | 38.46   | 33.82   | 5.09   | 10.22   | 33.6    | 22.06   |
| 0.049953   | 72.57   | 67.34   | 70.27   | 4.26   | 68.51   | 51.65   | 60.3    |
| 0.366238   | 80.51   | 83.04   | 82.17   | 6.63   | 133.37  | 112.6   | 122.55  |
| 0.25602    | 826.32  | 999.45  | 909.94  | 89.76  | 1854.75 | 1859.25 | 1856.32 |
| 0.249212   | 1       | 3.77    | 1.78    | 2.96   | 19.01   | 34.72   | 26.66   |
| 0.341234   | 1401.18 | 1403.43 | 1402.1  | 21.75  | 1306.56 | 1003.18 | 1155.51 |
| 0.227045   | 498.7   | 536.94  | 518.35  | 37.42  | 1084.46 | 1183.99 | 1137.91 |
| 0.18099    | 581.31  | 621.71  | 598.08  | 44.93  | 1198.02 | 1324.88 | 1259.35 |
| 0.33256    | 127.45  | 140.42  | 133.96  | 13.23  | 84.79   | 81.97   | 83.18   |
| 0.051793 * | 389.11  | 355.82  | 372.98  | 19.89  | 468.52  | 506.18  | 486.74  |
| 0.269556   | 389.89  | 419.21  | 403.12  | 17.65  | 309.58  | 239.76  | 273.9   |
| 0.031251   | 788.32  | 796.92  | 793.22  | 22.52  | 1179.21 | 1207.14 | 1191.02 |
| 0.278419   | 254.86  | 204.44  | 229.32  | 26.73  | 453.68  | 486.11  | 469.98  |
| 0.095412   | 48.15   | 41.61   | 45.74   | 6.42   | 65.78   | 64.99   | 65.23   |
| 0.185346   | 70.42   | 66.99   | 68.46   | 5.98   | 54.68   | 48.96   | 52.57   |
| 0.780231   | 108.47  | 106.38  | 107.34  | 5.23   | 62.74   | 82.32   | 72.34   |
| 0.378259   | 33      | 37.66   | 35.71   | 5.03   | 60.56   | 57.59   | 58.96   |

|           |         |         |         |        |         |         |         |
|-----------|---------|---------|---------|--------|---------|---------|---------|
| 0.425449  | 51.03   | 52.66   | 51.76   | 4.93   | 36.97   | 42.96   | 39.75   |
| 0.220119  | 512.74  | 434.83  | 475.15  | 43.53  | 717.85  | 754.69  | 735.02  |
| 0.206738  | 36.44   | 38.5    | 37.33   | 4.15   | 33.14   | 37.38   | 35.6    |
| 0.222271  | 44.16   | 52.13   | 48.18   | 6.91   | 32.34   | 18.9    | 26.25   |
| 0.239142  | 74.97   | 62.32   | 68.27   | 7.4    | 46.69   | 25.19   | 36.07   |
| 0.629638  | 46.47   | 44.79   | 45.78   | 6.45   | 27.14   | 16.43   | 21.49   |
| 0.123527  | 21.5    | 23.23   | 22.41   | 4.06   | 24.74   | 26.58   | 25.64   |
| 0.232137  | 368.64  | 412.33  | 389.09  | 24     | 580.43  | 648.94  | 613.6   |
| 0.952733  | 9.03    | 5.93    | 7.72    | 3.48   | 10.06   | 6.01    | 8.3     |
| 0.21326   | 59.15   | 46.59   | 52.47   | 8.82   | 93.86   | 119.08  | 106.07  |
| 0.307451  | 41.27   | 42.47   | 41.85   | 4.59   | 25.47   | 29.43   | 26.69   |
| 0.111499  | 141.72  | 135.09  | 138.56  | 8.58   | 214.34  | 231.26  | 222.73  |
| 0.169198  | 51.71   | 40.55   | 46.07   | 6.16   | 29.07   | 9.62    | 19.29   |
| 0.187217  | 1918.59 | 1948.5  | 1929.42 | 37.58  | 1581.37 | 1416.68 | 1500.91 |
| 0.445532  | 95.98   | 89.12   | 92.78   | 8.92   | 39.59   | 41.6    | 40.39   |
| 0.804819  | 168.3   | 164.08  | 166.06  | 13.67  | 251.17  | 303.24  | 275.36  |
| 0.095582  | 2106.13 | 2228.24 | 2160.51 | 78.73  | 3464.57 | 3946.5  | 3708.42 |
| 0.682087  | 32.89   | 21.06   | 26.81   | 7.41   | 48.07   | 31.61   | 39.79   |
| 0.733573  | 55.94   | 37.49   | 46.47   | 11.33  | 31.78   | 52.23   | 42.44   |
| 0.114511  | 143.32  | 136.29  | 139.41  | 8.67   | 114.53  | 76.94   | 95.79   |
| 0.312988  | 2491.47 | 2078.79 | 2286.54 | 222.5  | 2688.76 | 3771.39 | 3228.41 |
| 0.157677  | 48.49   | 47.99   | 48.17   | 4.33   | 88.01   | 89.04   | 88.64   |
| 0.757861  | 9.6     | 32.33   | 21.44   | 11.98  | 32.83   | 12.62   | 23.15   |
| 0.090071  | 36.68   | 41.24   | 38.81   | 5.22   | 37.86   | 23.54   | 30.54   |
| 0.893912  | 829.69  | 1572.54 | 1200.58 | 371.46 | 2520.47 | 1450.14 | 1984.28 |
| 0.370126  | 444.19  | 417.59  | 433.06  | 21.86  | 705.67  | 744.45  | 725.03  |
| 0.519592  | 153.88  | 169.3   | 161.18  | 8.82   | 117.95  | 155.82  | 137.54  |
| 0.678961  | 41.64   | 46.78   | 43.92   | 3.65   | 37.75   | 45.69   | 41.96   |
| 0.502977  | 18.96   | 15.44   | 17.21   | 5.4    | 24.62   | 21.73   | 23.1    |
| 0.842251  | 12.25   | 22.75   | 17.31   | 5.52   | 21.41   | 21.61   | 21.51   |
| 0.070338  | 14.73   | 13.22   | 14.13   | 3.92   | 38.21   | 35.77   | 37.13   |
| 0.801348  | 198.36  | 217.79  | 208.94  | 12.27  | 109.59  | 114.19  | 112.06  |
| 0.09216 * | 32.57   | 33.68   | 33.19   | 3.02   | 11.17   | 1.99    | 6.93    |
| 0.24728   | 171.96  | 180.4   | 175.41  | 14.7   | 117.86  | 99.18   | 107.3   |
| 0.514879  | 161.97  | 253.4   | 207.02  | 46.52  | 301.52  | 172.97  | 237.38  |
| 0.333339  | 238.79  | 207.98  | 224.17  | 18.01  | 185.33  | 157.56  | 171.69  |

|          |         |        |         |        |         |        |         |
|----------|---------|--------|---------|--------|---------|--------|---------|
| 0.935981 | 21.42   | 23.18  | 22.41   | 2.12   | 12.72   | 26.07  | 19.63   |
| 0.566395 | 1597.11 | 1351.8 | 1474.83 | 126.61 | 1341.06 | 1330.8 | 1335.99 |
| 0.964651 | 32.51   | 20.09  | 26.19   | 6.62   | 25.88   | 18.99  | 22.16   |
| 0.460799 | 167.91  | 147.26 | 158.22  | 12.97  | 280.7   | 324.65 | 302.08  |
| 0.155927 | 461.67  | 448.24 | 455.88  | 13.48  | 572.53  | 425.66 | 500.44  |
| 0.437904 | 13.28   | 8.56   | 10.75   | 3.08   | 20.51   | 13.82  | 16.45   |
| 0.425733 | 33.68   | 29.79  | 31.32   | 3.86   | 12.3    | 8.14   | 10.76   |
| 0.217076 | 34.43   | 32.64  | 33.5    | 3.58   | 28.29   | 32.46  | 30.07   |
| 0.175993 | 18.63   | 14.1   | 16.12   | 3.59   | 23.33   | 16.46  | 20.01   |
| 0.824105 | 17.41   | 5.41   | 11.64   | 7.77   | 7.81    | 7.67   | 7.73    |
| 0.764087 | 63.62   | 68.48  | 65.68   | 7.89   | 64.11   | 35.84  | 49.64   |
| 0.711991 | 32.9    | 35.06  | 33.88   | 5.55   | 26.09   | 12.27  | 20.33   |
| 0.800205 | 93.96   | 118.54 | 106.42  | 12.42  | 68.31   | 57.06  | 61.97   |
| 0.262665 | 59.14   | 60.24  | 59.69   | 5.18   | 123.49  | 110.05 | 117.68  |
| 0.783217 | 44.14   | 40.33  | 42.74   | 3.86   | 16.36   | 18.38  | 17.27   |
| 0.573977 | 80.78   | 62.42  | 71.32   | 9.94   | 73.89   | 102.4  | 87.53   |
| 0.820182 | 15.61   | 11.11  | 13.55   | 5.3    | 21.9    | 10.98  | 16.38   |
| 0.526736 | 23.75   | 15.45  | 19.55   | 5.35   | 35.15   | 28.59  | 32.2    |
| 0.386231 | 308.11  | 370.99 | 339.49  | 31.99  | 566.14  | 512.71 | 539.52  |
| 0.607667 | 14.59   | 19.81  | 17.3    | 2.95   | 8.27    | 5.65   | 6.72    |
| 0.936857 | 110.46  | 113.72 | 112.08  | 7.34   | 215.79  | 239.85 | 228.03  |
| 0.450979 | 75.12   | 77.08  | 75.91   | 3.44   | 75.03   | 79.56  | 77.21   |
| 0.188547 | 25.02   | 21.82  | 23.12   | 3.55   | 18.67   | 3.86   | 10.8    |
| 0.085289 | 6.47    | 12.68  | 9.96    | 3.83   | 6.23    | 3.18   | 4.36    |
| 0.678043 | 12.97   | 16.09  | 14.72   | 2.48   | 15.15   | 12.55  | 13.67   |
| 0.884552 | 27.98   | 29.27  | 28.88   | 3.04   | 28.33   | 24.9   | 26.35   |
| 0.945219 | 29.65   | 6.47   | 18.15   | 11.88  | 23.25   | 7.15   | 15.24   |
| 0.5237   | 46.33   | 48.26  | 47.38   | 6.18   | 9.58    | 23.68  | 16.88   |
| 0.926655 | 10.17   | 14.19  | 12.03   | 3.63   | 17.98   | 10.37  | 14.75   |
| 0.950337 | 12.06   | 12.91  | 12.56   | 3.97   | 7.73    | 7.86   | 7.79    |
| 0.706963 | 11.96   | 5.42   | 8.42    | 4.49   | 11.93   | 2.2    | 7.19    |
| 0.454409 | 13.09   | 16.97  | 14.67   | 3.31   | 11.93   | 20.93  | 15.96   |
| 0.30794  | 151.05  | 203.18 | 176.82  | 26.89  | 323.79  | 272.09 | 297.53  |
| 0.886438 | 76.26   | 84.09  | 80.6    | 8.46   | 65.8    | 52.84  | 59.1    |
| 0.908063 | 28.93   | 37.73  | 32.87   | 6.07   | 6.09    | 2.59   | 4.06    |
| 0.919565 | 33.66   | 28.87  | 31.41   | 5.32   | 38.79   | 26.84  | 32.47   |

|            |         |        |        |        |        |        |        |
|------------|---------|--------|--------|--------|--------|--------|--------|
| 0.200057   | 1045.76 | 817.2  | 928.46 | 137.29 | 421.94 | 226.46 | 322.63 |
| 0.126293   | 24.25   | 20.64  | 22.66  | 3.2    | 8.57   | 11.61  | 10.44  |
| 0.875713   | 140.89  | 131.61 | 136.61 | 8.72   | 154.1  | 116.69 | 135.21 |
| 0.97987    | 9.45    | 3.49   | 6.18   | 4.73   | 6.37   | 7.74   | 6.95   |
| 0.260076   | 143.88  | 161.61 | 153.84 | 11.07  | 159.74 | 104.24 | 133.13 |
| 0.52468    | 71.68   | 66.18  | 68.12  | 6.46   | 21.26  | 16.15  | 18.49  |
| 0.053621 * | 89.82   | 70.71  | 80.45  | 12.04  | 75.61  | 89.36  | 81.88  |
| 0.088432 * | 18.17   | 12.41  | 15.57  | 4.61   | 28.9   | 47.97  | 38.6   |
| 0.693524   | 1.21    | 14.28  | 7.62   | 6.68   | 15.85  | 25.58  | 20.71  |
| 0.037396 * | 51.41   | 52.11  | 51.8   | 3.67   | 56.21  | 39.74  | 47.9   |
| 0.326057   | 8.01    | 22.97  | 14.82  | 8.69   | 13.05  | 12.19  | 12.52  |
| 0.934982   | 20.05   | 16.24  | 18.07  | 2.57   | 3.35   | 16.07  | 9.4    |
| 0.171613   | 41.55   | 35.66  | 39.46  | 4.3    | 19.38  | 12.46  | 15.74  |
| 0.618681   | 50.99   | 60.72  | 56.02  | 6.32   | 52.5   | 60.15  | 56.92  |
| 0.30416    | 40.12   | 30.02  | 34.92  | 6.11   | 40.02  | 29.83  | 35.63  |
| 0.544296   | 10.01   | 5.36   | 7.56   | 5.53   | 4.69   | 16.22  | 10.79  |
| 0.210932   | 35.27   | 34.72  | 35.03  | 2.65   | 19.04  | 3.49   | 11.37  |
| 0.53946    | 164.35  | 187.81 | 174.31 | 14.56  | 204.04 | 191.87 | 197.36 |
| 0.772209   | 137.04  | 214.02 | 175.18 | 38.99  | 139.96 | 89.59  | 114.53 |
| 0.194163   | 18.28   | 21.81  | 19.75  | 3.59   | 11.27  | 16.05  | 13.31  |
| 0.689166   | 199.19  | 227.03 | 212.55 | 18.9   | 180.62 | 142.34 | 161.9  |
| 0.203264   | 39.17   | 33.22  | 35.9   | 4      | 10.56  | 15.11  | 13.35  |
| 0.720122   | 47.27   | 42.18  | 44.69  | 4.19   | 20.64  | 22.07  | 21.55  |
| 0.652688   | 10.06   | 4.25   | 6.64   | 6.21   | 3.92   | 15.23  | 9.01   |
| 0.735488   | 26.25   | 18.04  | 22.48  | 4.97   | 13.77  | 39.44  | 26     |
| 0.317281   | 12.8    | 10.82  | 12.02  | 3.06   | 7.84   | 9.38   | 8.43   |
| 0.475266   | 9.5     | 14.29  | 11.35  | 3.66   | 14     | 1.76   | 6.9    |
| 0.433918   | 6.59    | 52.23  | 29.44  | 22.78  | 31.87  | 4.96   | 18.74  |
| 0.579042   | 43.43   | 43.46  | 43.44  | 4.88   | 34.56  | 30.05  | 31.98  |
| 0.459744   | 35.19   | 35.97  | 35.69  | 2.77   | 20.15  | 25.2   | 22.44  |
| 0.283761   | 50.89   | 52.97  | 51.85  | 4.6    | 43.27  | 31.27  | 37.8   |
| 0.446014   | 11.09   | 4.51   | 7.88   | 4.99   | 30.34  | 9.28   | 20.41  |
| 0.372558   | 35.62   | 19.03  | 27.33  | 9.24   | 23.12  | 30.51  | 27.44  |
| 0.061821 * | 23.92   | 17.66  | 21.36  | 4.19   | 26.17  | 35.41  | 31.56  |
| 0.042249 * | 4.61    | 4.04   | 4.33   | 3.74   | 4.94   | 11.61  | 8.34   |
| 0.678308   | 64.13   | 62.79  | 63.58  | 2.3    | 30.98  | 37.44  | 33.05  |

|            |        |        |        |        |        |        |        |
|------------|--------|--------|--------|--------|--------|--------|--------|
| 0.588941   | 11.36  | 17.73  | 14.38  | 3.59   | 21.94  | 13.24  | 17.74  |
| 0.172566   | 41.65  | 42.32  | 42     | 3.1    | 7.04   | 32.03  | 20.02  |
| 0.780039   | 55.14  | 61.63  | 58.73  | 5.38   | 26.1   | 18.72  | 21.52  |
| 0.333368   | 579.58 | 782.99 | 680.86 | 102.17 | 694.66 | 254.49 | 474.63 |
| 0.8607     | 19.15  | 1.53   | 10.05  | 9.47   | 10.4   | 4.79   | 8.17   |
| 0.517306   | 14.16  | 20.43  | 16.82  | 5.84   | 23.79  | 25.77  | 24.71  |
| 0.963182   | 23.38  | 36.91  | 30.24  | 6.87   | 27.77  | 29.06  | 28.64  |
| 0.776231   | 7.73   | 13.14  | 10.74  | 3.14   | 18.38  | 22.68  | 20.48  |
| 0.800422   | 27.02  | 17.14  | 21.65  | 6.73   | 36.04  | 19.14  | 28.17  |
| 0.638313   | 5.01   | 6.85   | 5.55   | 2.76   | 11.12  | 12.61  | 12.07  |
| 0.430828   | 499.7  | 590.21 | 544.85 | 46.52  | 266.11 | 162.03 | 214.14 |
| 0.747486   | 24.88  | 29.53  | 27.3   | 3.06   | 21.1   | 20.77  | 20.88  |
| 0.247711   | 30.39  | 25.21  | 28.51  | 4.4    | 28.78  | 25.82  | 27.59  |
| 0.146604   | 36.46  | 27.66  | 32.53  | 5.76   | 41.75  | 59.28  | 50.57  |
| 0.847086   | 57.09  | 53.65  | 55.69  | 3.52   | 29.22  | 24.08  | 26.5   |
| 0.768183   | 7.85   | 8.09   | 7.94   | 3.23   | 12.68  | 3.34   | 8.31   |
| 0.089521 * | 4.23   | 3.71   | 3.98   | 3.68   | 4.44   | 68.32  | 36.43  |
| 0.065045 * | 7.72   | 14.39  | 11.38  | 4.44   | 19.64  | 33.17  | 26.45  |
| 0.507054   | 21.99  | 21.74  | 21.87  | 3.04   | 23.06  | 19.35  | 21.78  |
| 0.724329   | 35.09  | 35.05  | 35.08  | 3.1    | 2.83   | 10.25  | 5.5    |
| 0.586139   | 22.59  | 14.65  | 18.6   | 4.71   | 4.2    | 6.42   | 5.26   |
| 0.600615   | 19.18  | 11.77  | 15.41  | 4.99   | 16.03  | 2.37   | 8.89   |
| 0.229604   | 58.38  | 61.65  | 59.87  | 4.41   | 72.87  | 59.22  | 65.83  |
| 0.879915   | 49.25  | 45.72  | 47.49  | 2.83   | 23.9   | 24.12  | 24.01  |
| 0.412539   | 28.51  | 33.58  | 30.17  | 4.6    | 10.86  | 20.89  | 16.11  |
| 0.504142   | 1.67   | 1.93   | 1.79   | 1.46   | 7.22   | 10.44  | 8.94   |
| 0.344095   | 156.6  | 133.73 | 144.89 | 13.4   | 191.07 | 202.7  | 196.89 |
| 0.234425   | 251.15 | 329.73 | 291.81 | 41.12  | 668.3  | 572.04 | 618.87 |



| experiment | rr fold change | lower bound | upper bound | difference of | t statistic | P value    | filtered | DMSO | A112    |
|------------|----------------|-------------|-------------|---------------|-------------|------------|----------|------|---------|
| 15.76      | -1.36          | -1.06       | -1.81       | -39.84        | -2.097      | 0.18868    |          |      | 144     |
| 45.2       | -2.05          | -1.49       | -3.19       | -221.62       | -4.374      | 0.080768   |          |      | 411.02  |
| 20.34      | 2.46           | 1.84        | 3.7         | 510.19        | 6.96        | 0.068428 * |          |      | 279.09  |
| 10.69      | -1.95          | -1.62       | -2.4        | -97.9         | -6.176      | 0.02573 *  |          |      | 196.47  |
| 328.63     | -1.73          | -1.02       | -4.01       | -711.62       | -1.721      | 0.235925   |          |      | 1431.11 |
| 43.61      | -1.64          | -1.25       | -2.33       | -156.64       | -3.245      | 0.127404   |          |      | 382.96  |
| 188.71     | 1.12           | 0.82        | 1.47        | 138.66        | 0.66        | 0.598247   |          |      | 1202.32 |
| 282.79     | 1.28           | 0.88        | 1.84        | 389.94        | 1.122       | 0.388721   |          |      | 1583.6  |
| 237.08     | 1.42           | 0.98        | 1.95        | 400.01        | 1.551       | 0.314361   |          |      | 1055.22 |
| 513.72     | 1.29           | 0.89        | 1.83        | 698.73        | 1.157       | 0.386497   |          |      | 2686.87 |
| 222.1      | 1.72           | 1.48        | 1.98        | 1224.18       | 5.234       | 0.08846    |          |      | 1664.42 |
| 57.44      | 1.29           | 0.9         | 1.73        | 73.07         | 1.193       | 0.409883   |          |      | 268.4   |
| 5.81       | -1.07          | -0.38       | -2.46       | -1.38         | -0.142      | 0.901083   |          |      | 18.63   |
| 95.88      | -1.19          | -0.93       | -1.63       | -113.53       | -1.133      | 0.436629   |          |      | 691.97  |
| 111.73     | -1.16          | -0.92       | -1.54       | -126.86       | -1.015      | 0.447782   |          |      | 855.9   |
| 334.58     | -1.15          | -0.88       | -1.56       | -337.33       | -0.844      | 0.499594   |          |      | 2397.42 |
| 20.26      | -1.99          | -1.28       | -4.24       | -62.89        | -2.816      | 0.15479    |          |      | 126.56  |
| 141.34     | 1.64           | 1.09        | 2.27        | 283.24        | 1.926       | 0.276663   |          |      | 480.09  |

|        |       |       |            |         |        |          |         |
|--------|-------|-------|------------|---------|--------|----------|---------|
| 4.28   | -1.28 | -0.57 | -3.57      | -3.14   | -0.522 | 0.653701 | 16.49   |
| 30.69  | -1.57 | -1.28 | -2         | -138.42 | -3.941 | 0.086167 | 369.43  |
| 2.64   | -1.48 | -0.83 | -2.52      | -5.99   | -1.16  | 0.38841  | 19.74   |
| 12.11  | -1.95 | 0     | -100000000 | -16.71  | -0.646 | 0.602003 | 31.49   |
| 15.86  | -1.12 | -0.86 | -1.44      | -18.95  | -0.722 | 0.549868 | 157.88  |
| 11.16  | -1.34 | -0.97 | -1.97      | -20.72  | -1.464 | 0.287748 | 84.9    |
| 60.58  | 1.21  | 1.09  | 1.35       | 258.78  | 2.987  | 0.096228 | 1185.82 |
| 10.81  | -1.73 | -1.25 | -2.46      | -51.61  | -2.704 | 0.129295 | 116.38  |
| 24.64  | -1.03 | -0.83 | -1.23      | -20.43  | -0.252 | 0.837104 | 761.49  |
| 114.27 | -1.27 | -0.85 | -2.34      | -114.99 | -0.924 | 0.489721 | 485.79  |
| 24.47  | -1.07 | -0.95 | -1.22      | -26.88  | -0.916 | 0.468708 | 420.33  |
| 104.27 | 1.09  | 0.87  | 1.33       | 74.99   | 0.638  | 0.606701 | 917.02  |
| 41.18  | -1    | -0.82 | -1.26      | -1.03   | -0.022 | 0.984824 | 338.89  |
| 220.59 | -1.03 | -0.85 | -1.31      | -51.71  | -0.228 | 0.854293 | 1823.93 |
| 44.39  | 1.25  | 0.61  | 1.92       | 28.94   | 0.64   | 0.631389 | 110.44  |
| 65.6   | -1.13 | -0.92 | -1.44      | -65.16  | -0.92  | 0.494201 | 599.2   |
| 7.15   | 1.29  | 0     | 100000000  | 1.85    | 0.199  | 0.861026 | 6.26    |
| 11.09  | -1.96 | -1.24 | -3.17      | -52     | -2.348 | 0.173878 | 118.86  |
| 17.75  | -1.73 | -1.01 | -3.05      | -55.47  | -1.686 | 0.254912 | 141.09  |
| 10.27  | 1.04  | 0.71  | 1.6        | 2.86    | 0.178  | 0.875798 | 59.11   |
| 47.07  | 1.36  | 1.08  | 1.67       | 112.11  | 2.149  | 0.212666 | 324.35  |
| 7.83   | -1    | -0.61 | -1.74      | -0.16   | -0.016 | 0.98881  | 33.81   |
| 3.74   | -1.6  | -0.03 | -4.25      | -7.28   | -0.596 | 0.643699 | 7.69    |
| 20.59  | 1.34  | 0.74  | 2.24       | 21.03   | 0.882  | 0.489512 | 53.44   |
| 46.13  | -1.28 | -1.13 | -1.48      | -168.41 | -3.297 | 0.124512 | 767.79  |
| 18.09  | -1    | -0.95 | -1.06      | -3.44   | -0.124 | 0.912555 | 859.84  |
| 8.07   | 1.12  | 0.32  | 4.02       | 2.09    | 0.193  | 0.865118 | 20.58   |
| 34.69  | 1.63  | 0.18  | 4.12       | 24.81   | 0.677  | 0.603194 | 28.08   |
| 285.78 | -1.37 | -0.8  | -3.72      | -273.12 | -0.887 | 0.507523 | 907.15  |
| 9.66   | -1.17 | -0.89 | -1.63      | -10.28  | -0.917 | 0.474986 | 72.79   |
| 228.6  | -1.03 | -0.8  | -1.36      | -58.26  | -0.194 | 0.864539 | 1719.01 |
| 8.81   | -1.23 | -0.66 | -2.35      | -7.68   | -0.576 | 0.623843 | 38.97   |
| 15.78  | -1.05 | -0.7  | -1.48      | -7.12   | -0.223 | 0.848936 | 118.82  |
| 52.27  | -1.38 | -0.98 | -2.23      | -87.93  | -1.554 | 0.316203 | 299.87  |
| 66.33  | -1.42 | -0.93 | -2.96      | -88.24  | -1.315 | 0.406636 | 295.05  |
| 7.95   | -1.36 | -1.25 | -1.48      | -88.6   | -5.786 | 0.043613 | 325.72  |

|        |       |       |            |         |        |          |         |
|--------|-------|-------|------------|---------|--------|----------|---------|
| 23.35  | 1.48  | 1.16  | 1.87       | 66.51   | 2.544  | 0.168366 | 144.82  |
| 448.05 | -1.17 | -1.01 | -1.39      | -876.25 | -1.787 | 0.268774 | 5726.18 |
| 20.23  | -1.3  | -1    | -1.81      | -37.27  | -1.635 | 0.282384 | 163.56  |
| 32.19  | 1.5   | 1.15  | 1.98       | 105.04  | 2.498  | 0.133454 | 237.3   |
| 8.71   | -1.76 | -1.38 | -2.33      | -47.44  | -4.052 | 0.056932 | 107.97  |
| 20.67  | -1.22 | -0.99 | -1.48      | -64.84  | -1.604 | 0.276868 | 350.55  |
| 34.64  | -1.28 | -1    | -1.66      | -83.83  | -1.658 | 0.23974  | 368.05  |
| 6.07   | -1.05 | -0.87 | -1.26      | -5.2    | -0.445 | 0.707979 | 112.46  |
| 4.27   | -1.23 | -0.04 | -100000000 | -0.84   | -0.168 | 0.88494  | 4.22    |
| 183.26 | -1.32 | -0.85 | -2.8       | -181.24 | -0.963 | 0.499087 | 718.15  |
| 6.54   | -1.28 | -0.49 | -2.78      | -6.35   | -0.511 | 0.668798 | 34.34   |
| 337.4  | 1.03  | 0.78  | 1.39       | 89.21   | 0.165  | 0.884824 | 2634.42 |
| 82.23  | 1.01  | 0.77  | 1.3        | 7.56    | 0.077  | 0.946807 | 576.19  |
| 9.41   | -1.05 | -0.22 | -8.36      | -0.91   | -0.071 | 0.950124 | 15.17   |
| 34.02  | -1.59 | -0.78 | -22.97     | -35.75  | -0.973 | 0.474623 | 84.71   |
| 7.57   | -1.07 | -0.6  | -1.87      | -2.53   | -0.215 | 0.850463 | 31.02   |
| 35.26  | -1.11 | -0.85 | -1.5       | -29.06  | -0.641 | 0.589467 | 261.61  |
| 5.46   | 1.34  | 0     | 100000000  | 1.57    | 0.202  | 0.85858  | 4.34    |
| 245.84 | 1.05  | 0.85  | 1.26       | 103.82  | 0.388  | 0.750176 | 2080.75 |
| 9.21   | 1.06  | 0.25  | 2.13       | 1.07    | 0.107  | 0.928781 | 18.37   |
| 5.33   | 1.04  | 0.2   | 4.17       | 0.44    | 0.063  | 0.955786 | 12.17   |
| 4.57   | 1.06  | 0.68  | 1.82       | 1.65    | 0.204  | 0.859529 | 25.69   |
| 45.73  | 1.26  | 1.03  | 1.5        | 85.57   | 1.824  | 0.300904 | 327.87  |
| 13.34  | -1.32 | -0.52 | -100000000 | -5.75   | -0.401 | 0.744348 | 22.49   |
| 10.68  | 1.14  | 0.93  | 1.39       | 14.34   | 1.055  | 0.407182 | 96.95   |
| 82.78  | 1.01  | 0.62  | 1.45       | 2.95    | 0.033  | 0.977954 | 327.12  |
| 10.9   | 1.01  | 0.39  | 4.1        | 0.32    | 0.017  | 0.987846 | 45.01   |
| 7.75   | -1.28 | -1.11 | -1.48      | -35.66  | -2.89  | 0.106987 | 167.47  |
| 4.03   | -1.81 | -0.81 | -3.61      | -12.73  | -1.294 | 0.370307 | 36.71   |
| 30.28  | -1.43 | -1.12 | -1.9       | -92.35  | -2.488 | 0.144074 | 292.37  |
| 8.28   | 1.28  | 0.51  | 2.22       | 4.96    | 0.568  | 0.656708 | 18.01   |
| 11.58  | 1.24  | 0.91  | 1.67       | 16.27   | 1.138  | 0.382699 | 76.02   |
| 7.17   | 2.13  | 0.71  | 7.65       | 10.01   | 1.236  | 0.37454  | 6.31    |
| 13.4   | -1.11 | -0.67 | -2.34      | -4.78   | -0.316 | 0.790184 | 42.07   |
| 3.08   | -1.17 | 0     | -3.46      | -1.59   | -0.193 | 0.872485 | 18.23   |
| 6.4    | -1.43 | -0.4  | -13.72     | -5.02   | -0.533 | 0.647421 | 21.37   |

|        |       |       |            |         |        |          |          |
|--------|-------|-------|------------|---------|--------|----------|----------|
| 17.22  | 1.18  | 1.11  | 1.26       | 110.98  | 4.393  | 0.048547 | 620.26   |
| 22.42  | -1.29 | -0.8  | -2.28      | -26.58  | -0.868 | 0.477482 | 102.74   |
| 222.78 | -1    | -0.7  | -1.41      | -0.24   | -0.001 | 0.999479 | 1342.88  |
| 49.08  | -1.06 | -0.94 | -1.19      | -50.61  | -0.795 | 0.512474 | 909.22   |
| 177.12 | -1.15 | -0.72 | -2.08      | -104.5  | -0.474 | 0.685429 | 678.62   |
| 104.12 | -1.03 | -0.81 | -1.41      | -19.84  | -0.188 | 0.880507 | 651.98   |
| 74.23  | -1.03 | -0.76 | -1.44      | -11.64  | -0.131 | 0.909281 | 519.37   |
| 39.4   | 1.13  | 1     | 1.31       | 127.64  | 1.58   | 0.286988 | 890.43   |
| 20.31  | -1.17 | -0.91 | -1.59      | -22.45  | -1.018 | 0.456855 | 158.36   |
| 70.82  | 1.99  | 1.29  | 4.26       | 980.71  | 2.986  | 0.187623 | 672.15   |
| 86.01  | -1.29 | -1.04 | -1.69      | -174.61 | -1.936 | 0.270371 | 762.64   |
| 46.74  | -1.41 | -0.98 | -2.15      | -99.08  | -1.571 | 0.258007 | 299.92   |
| 149.42 | 1.25  | 0.99  | 1.54       | 245.35  | 1.56   | 0.330083 | 1013.4   |
| 160.02 | -1.22 | -1    | -1.52      | -324.15 | -1.613 | 0.256813 | 1921.5   |
| 4.66   | -1.53 | -0.47 | -4.48      | -6.54   | -0.727 | 0.556704 | 14.59    |
| 5.35   | -2.59 | -0.94 | -100000000 | -12.59  | -1.538 | 0.266295 | 20       |
| 8.11   | -1.59 | -0.36 | -100000000 | -6.19   | -0.568 | 0.627789 | 11.93    |
| 15.92  | 1.01  | 0     | 100000000  | 0.17    | 0.008  | 0.994108 | 22.95    |
| 24.95  | -1.45 | -1.16 | -1.87      | -91.36  | -2.832 | 0.109892 | 273.29   |
| 98.8   | -1.1  | -0.91 | -1.4       | -82.88  | -0.813 | 0.55247  | 850.65   |
| 7.69   | 1.06  | 0     | 100000000  | 0.52    | 0.052  | 0.963576 | 8.75     |
| 760.22 | 1.07  | 0.97  | 1.17       | 956.91  | 1.224  | 0.419635 | 12990.22 |
| 10.83  | 1.99  | 0.51  | 5.97       | 12.16   | 1.031  | 0.451459 | 9.54     |
| 4.75   | 1.09  | 0.66  | 1.78       | 1.92    | 0.298  | 0.793697 | 24.43    |
| 12.28  | 1.04  | 0.52  | 1.77       | 1.49    | 0.102  | 0.929534 | 43.68    |
| 8.38   | -1.04 | -0.8  | -1.42      | -2.56   | -0.261 | 0.823152 | 57.26    |
| 3.01   | -1.32 | -0.22 | -4.2       | -2.46   | -0.414 | 0.727349 | 6.61     |
| 5.24   | -2.83 | -1.47 | -5.32      | -38.7   | -2.339 | 0.219413 | 45.54    |
| 7.04   | -1.06 | -0.84 | -1.38      | -3.5    | -0.407 | 0.72735  | 60.02    |
| 8.9    | -1.21 | -0.01 | -3.65      | -5.19   | -0.255 | 0.830317 | 12.06    |
| 7.33   | -1.08 | -0.98 | -1.2       | -14.55  | -1.309 | 0.322603 | 187.71   |
| 39.53  | 1.1   | 0.98  | 1.23       | 61.21   | 1.347  | 0.338738 | 616.11   |
| 3.17   | -1.37 | -0.84 | -2.32      | -5.44   | -1.089 | 0.393543 | 18.91    |
| 23.42  | 1.14  | 0.86  | 1.47       | 21.07   | 0.785  | 0.533438 | 159.9    |
| 83.35  | 1.17  | 1.06  | 1.28       | 269.21  | 2.694  | 0.13294  | 1581.06  |
| 4.92   | -1.59 | -0.9  | -3.36      | -9.47   | -1.34  | 0.312207 | 21.76    |

|        |       |       |           |         |        |          |         |
|--------|-------|-------|-----------|---------|--------|----------|---------|
| 10.63  | -1.55 | -0.58 | -7.95     | -12.02  | -0.774 | 0.520336 | 31.23   |
| 7.4    | -1.51 | -0.5  | -9.92     | -7.39   | -0.677 | 0.568513 | 17.6    |
| 152.02 | -1.21 | -1    | -1.49     | -321.44 | -1.644 | 0.247249 | 1961.77 |
| 671.08 | 1.01  | 0.84  | 1.17      | 54.49   | 0.08   | 0.948549 | 6721.7  |
| 23.8   | -1.13 | -0.89 | -1.51     | -20.75  | -0.798 | 0.539442 | 186.15  |
| 12.39  | 1.1   | 1     | 1.21      | 41      | 1.726  | 0.251742 | 420     |
| 43.5   | 1.47  | 1.27  | 1.69      | 217.26  | 4.267  | 0.070353 | 443.38  |
| 28.26  | 1.19  | 1.12  | 1.27      | 251.41  | 4.72   | 0.058292 | 1269.21 |
| 198.27 | 1.11  | 0.94  | 1.28      | 202.69  | 1.018  | 0.492008 | 1919.09 |
| 22.29  | 1.28  | 0.96  | 1.68      | 39.62   | 1.436  | 0.298281 | 129.55  |
| 33.88  | 1.01  | 0.84  | 1.23      | 7.02    | 0.106  | 0.927295 | 614.77  |
| 81.8   | 1.26  | 0.97  | 1.73      | 252.98  | 1.428  | 0.325721 | 829.1   |
| 12.47  | -1.39 | -1.14 | -1.66     | -92.67  | -2.642 | 0.183651 | 297.81  |
| 34     | -1.4  | -1.12 | -1.82     | -98.07  | -2.607 | 0.168782 | 332.15  |
| 126.58 | 1.21  | 0.87  | 1.61      | 139.08  | 0.999  | 0.458984 | 593.68  |
| 10.76  | 1.05  | 0.6   | 1.68      | 2.06    | 0.158  | 0.890431 | 42.34   |
| 15.61  | 1.33  | 1.2   | 1.48      | 74.85   | 4.191  | 0.078726 | 223.38  |
| 7.78   | -1.38 | -0.41 | -11.08    | -5.52   | -0.496 | 0.669247 | 16.88   |
| 2.57   | 1.24  | 0.17  | 10000000  | 0.94    | 0.251  | 0.825603 | 3.47    |
| 2.53   | 3.49  | 0     | 10000000  | 2.49    | 0.895  | 0.497618 | 1       |
| 37     | -1.63 | -1.12 | -2.88     | -88.21  | -2.278 | 0.230476 | 223.25  |
| 11.25  | 1.05  | 0.38  | 2.35      | 1.35    | 0.096  | 0.932966 | 23.14   |
| 6.88   | 1.42  | 1.13  | 1.87      | 31.13   | 2.541  | 0.142765 | 68.11   |
| 14.91  | -1.26 | -0.97 | -1.77     | -22.24  | -1.435 | 0.362998 | 109.09  |
| 5.01   | 1.43  | 0.97  | 2.29      | 12.01   | 1.519  | 0.272677 | 32.6    |
| 3.98   | -2.51 | -0.71 | -17       | -11.66  | -1.31  | 0.357813 | 11.62   |
| 16.22  | -1.25 | -1.01 | -1.6      | -33.41  | -1.761 | 0.246313 | 161.22  |
| 27.65  | 1.45  | 1.3   | 1.61      | 172.13  | 5.303  | 0.049407 | 375.06  |
| 277.23 | 1.02  | 0.82  | 1.22      | 39.95   | 0.13   | 0.91256  | 2417.09 |
| 3.19   | 5.3   | 2.2   | 10000000  | 14.81   | 3.614  | 0.073452 | 2.22    |
| 90.02  | -1.14 | -0.97 | -1.37     | -125.94 | -1.315 | 0.378441 | 1054.03 |
| 7.66   | 1.81  | 0.87  | 3.93      | 12.16   | 1.369  | 0.330207 | 16.71   |
| 16.91  | -2.41 | -1.06 | -10000000 | -34.4   | -1.812 | 0.253126 | 52.75   |
| 14.05  | -1.53 | -0.77 | -7.53     | -15.38  | -0.958 | 0.462612 | 37.29   |
| 3.28   | -2.23 | -1.2  | -5.99     | -10.74  | -2.158 | 0.165665 | 21.45   |
| 213.15 | 1.21  | 0.88  | 1.55      | 227.99  | 1.039  | 0.472737 | 1144.65 |

|        |       |       |            |         |        |          |         |
|--------|-------|-------|------------|---------|--------|----------|---------|
| 8.06   | 1.07  | 0.37  | 100000000  | 1.77    | 0.092  | 0.937983 | 6.79    |
| 31.32  | -1.02 | -0.85 | -1.2       | -10.3   | -0.17  | 0.883874 | 627.74  |
| 7.07   | -1.49 | -0.44 | -4.25      | -9.33   | -0.679 | 0.580333 | 39.58   |
| 5.69   | 1.38  | 0.9   | 2.38       | 11.06   | 1.21   | 0.355278 | 23.31   |
| 8.98   | -1.36 | -1.18 | -1.58      | -42.6   | -3.581 | 0.071957 | 155.5   |
| 4.83   | 1.47  | 1.06  | 2.21       | 15.81   | 1.968  | 0.197563 | 27.86   |
| 24.89  | -1.51 | -1.32 | -1.74      | -163.71 | -5.324 | 0.040678 | 474.81  |
| 182.6  | -1.12 | -1.04 | -1.22      | -505.44 | -2.453 | 0.173091 | 4653.05 |
| 9.84   | -1.45 | -0.86 | -3.1       | -14.05  | -1.151 | 0.377655 | 48.57   |
| 17.89  | 1.53  | 0.87  | 4.76       | 49.75   | 1.179  | 0.399167 | 55.38   |
| 92.63  | -1.29 | -1.1  | -1.53      | -325.26 | -2.644 | 0.120387 | 1378.88 |
| 89.73  | 1.05  | 0.67  | 1.47       | 18.92   | 0.195  | 0.871084 | 372.53  |
| 15.91  | 1.1   | 0.5   | 1.91       | 4.69    | 0.264  | 0.823943 | 43.1    |
| 12.8   | 1.22  | 1.04  | 1.47       | 47.99   | 2.022  | 0.202405 | 196.07  |
| 100.58 | 1.13  | 0.8   | 1.54       | 73.72   | 0.606  | 0.613094 | 650.58  |
| 9.9    | -1.26 | -0.5  | -2.59      | -9.68   | -0.502 | 0.675231 | 32.18   |
| 38.19  | -1.07 | -0.94 | -1.23      | -35.48  | -0.849 | 0.517697 | 559.76  |
| 3.86   | 1.51  | 0     | 100000000  | 0.96    | 0.221  | 0.851474 | 2.77    |
| 17.59  | -1.14 | -0.85 | -1.63      | -14.68  | -0.722 | 0.56078  | 117.16  |
| 2.55   | -1.95 | 0     | -8.4       | -5.56   | -0.614 | 0.637065 | 3.11    |
| 7.85   | -2.05 | -1.35 | -3.42      | -35.96  | -2.827 | 0.112325 | 71.84   |
| 18.23  | -1.01 | -0.84 | -1.25      | -1.41   | -0.072 | 0.952182 | 162.05  |
| 55.98  | 1.26  | 1.15  | 1.38       | 291.13  | 4.172  | 0.060561 | 1082.62 |
| 127.72 | -1.19 | -0.92 | -1.6       | -167.41 | -1.112 | 0.400331 | 967.36  |
| 11.43  | 1.08  | 0.62  | 1.99       | 3.84    | 0.228  | 0.841125 | 59.5    |
| 101.72 | 1.03  | 0.72  | 1.41       | 15.84   | 0.13   | 0.910174 | 532.29  |
| 34.02  | 1.01  | 0.71  | 1.34       | 2.4     | 0.065  | 0.956371 | 185.81  |
| 13.09  | -1.05 | -0.61 | -1.79      | -3.01   | -0.158 | 0.888997 | 73.7    |
| 100.4  | 1.26  | 0.97  | 1.58       | 155.08  | 1.456  | 0.347047 | 629.76  |
| 36.37  | -1.16 | -0.84 | -1.76      | -27.84  | -0.694 | 0.583875 | 190.69  |
| 7.57   | 1.25  | 0.25  | 3.41       | 3.18    | 0.365  | 0.757931 | 15.47   |
| 1.72   | -2.2  | 0     | -100000000 | -1.88   | -0.625 | 0.602238 | 3.29    |
| 15.48  | 1.11  | 0.75  | 1.55       | 8.5     | 0.478  | 0.690577 | 69.46   |
| 6.43   | -1.07 | -0.22 | -16.22     | -0.75   | -0.088 | 0.938193 | 15.41   |
| 31.22  | -1.19 | -1.1  | -1.28      | -133.85 | -3.892 | 0.102151 | 851.1   |
| 29.99  | 1.35  | 0.71  | 2.18       | 28.25   | 0.868  | 0.512543 | 90.24   |

|        |       |       |           |          |         |            |         |
|--------|-------|-------|-----------|----------|---------|------------|---------|
| 2.69   | 2.25  | 0.49  | 100000000 | 3.73     | 0.839   | 0.495284   | 6.13    |
| 7.25   | -1.06 | -0.16 | -10.09    | -0.83    | -0.081  | 0.942873   | 20.22   |
| 51.74  | -1.68 | -1.17 | -2.39     | -244.83  | -2.291  | 0.183776   | 512.86  |
| 8.72   | -1.03 | -0.53 | -2.74     | -0.82    | -0.078  | 0.94564    | 25.8    |
| 20.96  | 1.12  | 0.75  | 1.58      | 11.93    | 0.491   | 0.681713   | 91.71   |
| 15.49  | -1.07 | -0.71 | -2.01     | -3.92    | -0.241  | 0.84419    | 59.47   |
| 37.17  | -1.54 | -1.13 | -2.36     | -95.28   | -2.424  | 0.209466   | 261.56  |
| 2.41   | -1.01 | -0.56 | -2.07     | -0.11    | -0.036  | 0.975078   | 9.21    |
| 160.9  | -1.1  | -0.99 | -1.23     | -262.36  | -1.456  | 0.321881   | 3003.23 |
| 29.68  | 1.3   | 0.53  | 2.36      | 19.52    | 0.608   | 0.630409   | 74.25   |
| 35.16  | 1.57  | 0.77  | 2.73      | 43.44    | 1.134   | 0.417971   | 91.12   |
| 49.11  | 1.5   | 1.1   | 1.92      | 102.32   | 2.044   | 0.275311   | 197.29  |
| 21.52  | 1.49  | 1     | 2.15      | 39.87    | 1.628   | 0.279822   | 85.74   |
| 7.86   | -1.13 | -0.73 | -1.89     | -4.47    | -0.45   | 0.699129   | 35.64   |
| 4.08   | -1.16 | -0.77 | -1.66     | -4.9     | -0.638  | 0.599231   | 30.79   |
| 46.46  | -1.45 | -0.92 | -2.9      | -70.58   | -1.301  | 0.346145   | 200.08  |
| 18.2   | -2.37 | -1.36 | -7.29     | -61.19   | -2.784  | 0.124851   | 96.42   |
| 10.73  | -1.13 | -1.03 | -1.23     | -38.45   | -2.148  | 0.174691   | 327.32  |
| 99.78  | -1.08 | -0.86 | -1.38     | -63.52   | -0.525  | 0.657908   | 839.18  |
| 7.71   | -1.51 | -1.18 | -2        | -28.08   | -2.804  | 0.111124   | 86.07   |
| 55.55  | -1.17 | -0.94 | -1.53     | -65.1    | -1.125  | 0.440737   | 440.29  |
| 5.51   | -1.45 | -0.68 | -3.03     | -8.64    | -0.872  | 0.486212   | 21.71   |
| 24.39  | -1.29 | -1.06 | -1.62     | -57.28   | -2.229  | 0.231149   | 255.39  |
| 7.79   | 1.24  | 0.68  | 2.76      | 7.24     | 0.581   | 0.62226    | 23.4    |
| 5.04   | -1.11 | -0.86 | -1.39     | -9.04    | -0.716  | 0.5762     | 99.88   |
| 143.25 | 1.94  | 1.64  | 2.27      | 933.54   | 5.965   | 0.060301 * | 939.79  |
| 8.3    | -2.12 | -1.97 | -2.29     | -215.36  | -19.538 | 0.00283 *  | 407.11  |
| 20.45  | 1.15  | 0     | 2.68      | 3.82     | 0.183   | 0.882982   | 24.74   |
| 36.17  | 1.59  | 1.35  | 1.87      | 173.01   | 4.32    | 0.086772   | 274.81  |
| 23.65  | 1.09  | 0.97  | 1.21      | 32.56    | 1.175   | 0.381709   | 387.28  |
| 14.57  | 1.21  | 1.14  | 1.28      | 126.31   | 5.35    | 0.037366   | 601.16  |
| 208.7  | -1.69 | -1.37 | -2.22     | -1006.83 | -4.689  | 0.114256   | 2453.13 |
| 9.58   | -2.09 | -1.74 | -2.54     | -108.93  | -6.693  | 0.027071 * | 199.23  |
| 7.14   | 2.12  | 1.17  | 5.32      | 20.51    | 2.111   | 0.170034   | 17.4    |
| 18.93  | -1.51 | -1.35 | -1.7      | -165.55  | -6.269  | 0.024561   | 500.37  |
| 13.92  | -1.93 | -1.44 | -2.88     | -65.63   | -4.294  | 0.091028   | 130.41  |

|        |       |       |           |          |        |            |         |
|--------|-------|-------|-----------|----------|--------|------------|---------|
| 78.17  | 2.52  | 1.98  | 3.4       | 902.32   | 7.561  | 0.018018 * | 504.53  |
| 9.66   | 2.2   | 0.67  | 13.59     | 13.32    | 1.192  | 0.3798     | 8.72    |
| 3.55   | 1.17  | 0.7   | 2.2       | 2.8      | 0.495  | 0.671738   | 19.36   |
| 33.14  | -1.53 | -1.23 | -1.94     | -155.03  | -3.313 | 0.080298   | 419.05  |
| 6.53   | -3.35 | -1.68 | -253.85   | -25.55   | -3.8   | 0.142646   | 36.39   |
| 144.37 | 1.35  | 1.09  | 1.61      | 331.57   | 2.256  | 0.25196    | 945.09  |
| 57.13  | 1.74  | 1.47  | 2.09      | 563.83   | 6.024  | 0.030644   | 692.29  |
| 92.38  | -1.42 | -1.06 | -1.96     | -276.65  | -1.942 | 0.194871   | 823.33  |
| 68.6   | 1.27  | 1.07  | 1.48      | 162.67   | 2.236  | 0.226577   | 583.75  |
| 3.62   | 1.07  | 0.46  | 2.42      | 0.74     | 0.152  | 0.893202   | 8.73    |
| 13.54  | -1.19 | -0.86 | -1.74     | -15.27   | -0.867 | 0.479875   | 87.05   |
| 17.63  | -1.47 | -1.18 | -1.91     | -60.48   | -3.123 | 0.137466   | 189.43  |
| 25.15  | 1.59  | 1.15  | 2.11      | 62.84    | 2.29   | 0.204708   | 112.87  |
| 6.95   | -1.95 | -1.06 | -8.7      | -14.01   | -1.831 | 0.259225   | 29.58   |
| 6.57   | 1.67  | 1.01  | 2.8       | 12.91    | 1.666  | 0.260389   | 16.55   |
| 768.58 | -1.96 | -1.51 | -2.79     | -4119.21 | -5.109 | 0.093037 * | 8543.35 |
| 21.97  | -1.16 | -1.06 | -1.26     | -147.84  | -2.606 | 0.178865   | 1031.71 |
| 5.17   | -1.11 | -0.78 | -1.57     | -4.02    | -0.497 | 0.669888   | 36.65   |
| 92.15  | -1.41 | -1.09 | -1.95     | -239.15  | -2.236 | 0.183921   | 769.6   |
| 11.87  | -1.53 | -0.76 | -13.38    | -11.76   | -0.91  | 0.495248   | 28.95   |
| 9.69   | -1.17 | -0.9  | -1.61     | -9.97    | -0.941 | 0.482228   | 72.57   |
| 11.74  | 1.49  | 1.21  | 1.83      | 40.38    | 2.995  | 0.126353   | 80.51   |
| 38.86  | 2.04  | 1.75  | 2.44      | 946.38   | 9.676  | 0.032046 * | 826.32  |
| 8.21   | 14.99 | 3.27  | 100000000 | 24.88    | 2.852  | 0.171906   | 1       |
| 155.62 | -1.21 | -0.99 | -1.56     | -246.59  | -1.569 | 0.354419   | 1401.18 |
| 80.34  | 2.2   | 1.86  | 2.6       | 619.56   | 6.99   | 0.045727 * | 498.7   |
| 105.32 | 2.11  | 1.74  | 2.53      | 661.26   | 5.775  | 0.064821 * | 581.31  |
| 9.73   | -1.61 | -1.25 | -2.09     | -50.78   | -3.091 | 0.100665   | 127.45  |
| 28.86  | 1.3   | 1.14  | 1.49      | 113.76   | 3.246  | 0.097238   | 389.11  |
| 37.32  | -1.47 | -1.19 | -1.91     | -129.22  | -3.13  | 0.133807   | 389.89  |
| 30.34  | 1.5   | 1.41  | 1.6       | 397.8    | 10.527 | 0.011653   | 788.32  |
| 17.64  | 2.05  | 1.7   | 2.56      | 240.66   | 7.513  | 0.025343 * | 254.86  |
| 5.59   | 1.43  | 1.1   | 1.91      | 19.49    | 2.29   | 0.151496   | 48.15   |
| 8.02   | -1.3  | -0.99 | -1.79     | -15.89   | -1.588 | 0.262997   | 70.42   |
| 10.46  | -1.48 | -1.18 | -1.97     | -35.01   | -2.993 | 0.136905   | 108.47  |
| 2.63   | 1.65  | 1.32  | 2.17      | 23.24    | 4.092  | 0.086257   | 33      |



|        |       |       |            |         |        |            |         |
|--------|-------|-------|------------|---------|--------|------------|---------|
| 6.01   | -1.3  | -0.98 | -1.79      | -12.01  | -1.545 | 0.266812   | 51.03   |
| 24.43  | 1.55  | 1.33  | 1.84       | 259.87  | 5.206  | 0.056448   | 512.74  |
| 6.45   | -1.05 | -0.75 | -1.55      | -1.72   | -0.225 | 0.846308   | 36.44   |
| 9.45   | -1.84 | -1.07 | -4.58      | -21.93  | -1.873 | 0.213344   | 44.16   |
| 12.16  | -1.89 | -1.16 | -4.3       | -32.21  | -2.263 | 0.178083   | 74.97   |
| 6.73   | -2.13 | -1.3  | -4.5       | -24.29  | -2.607 | 0.121257   | 46.47   |
| 5.11   | 1.14  | 0.71  | 1.8        | 3.23    | 0.494  | 0.672301   | 21.5    |
| 36.77  | 1.58  | 1.37  | 1.82       | 224.5   | 5.113  | 0.048909   | 368.64  |
| 3.57   | 1.08  | 0.28  | 4.51       | 0.58    | 0.117  | 0.917605   | 9.03    |
| 13.64  | 2.02  | 1.44  | 2.94       | 53.59   | 3.298  | 0.099347   | 59.15   |
| 5      | -1.57 | -1.12 | -2.34      | -15.16  | -2.235 | 0.155949   | 41.27   |
| 10.82  | 1.61  | 1.41  | 1.83       | 84.16   | 6.095  | 0.029182   | 141.72  |
| 10.51  | -2.39 | -1.19 | -23.13     | -26.78  | -2.197 | 0.188651   | 51.71   |
| 94.34  | -1.29 | -1.16 | -1.44      | -428.51 | -4.22  | 0.102241   | 1918.59 |
| 7.26   | -2.3  | -1.68 | -3.35      | -52.39  | -4.554 | 0.048499 * | 95.98   |
| 30.19  | 1.66  | 1.31  | 2.07       | 109.3   | 3.298  | 0.128537   | 168.3   |
| 256.3  | 1.72  | 1.5   | 1.94       | 1547.91 | 5.773  | 0.082103 * | 2106.13 |
| 9.52   | 1.48  | 0.8   | 2.94       | 12.97   | 1.075  | 0.400513   | 32.89   |
| 11.47  | -1.09 | -0.58 | -2.14      | -4.02   | -0.25  | 0.826205   | 55.94   |
| 19.74  | -1.46 | -1.06 | -2.22      | -43.62  | -2.023 | 0.235394   | 143.32  |
| 543.15 | 1.41  | 0.99  | 1.91       | 941.87  | 1.605  | 0.307136   | 2491.47 |
| 6.75   | 1.84  | 1.52  | 2.24       | 40.47   | 5.047  | 0.050918 * | 48.49   |
| 10.84  | 1.08  | 0.22  | 13.71      | 1.71    | 0.106  | 0.925471   | 9.6     |
| 8.64   | -1.27 | -0.8  | -2.44      | -8.27   | -0.819 | 0.514228   | 36.68   |
| 539.21 | 1.65  | 0.81  | 3.65       | 783.71  | 1.197  | 0.366925   | 829.69  |
| 23.97  | 1.67  | 1.52  | 1.85       | 291.96  | 9      | 0.012441 * | 444.19  |
| 19.28  | -1.17 | -0.93 | -1.54      | -23.65  | -1.115 | 0.420133   | 153.88  |
| 4.72   | -1.05 | -0.84 | -1.33      | -1.95   | -0.328 | 0.775973   | 41.64   |
| 5.31   | 1.34  | 0.71  | 2.95       | 5.89    | 0.778  | 0.518137   | 18.96   |
| 2.6    | 1.24  | 0.77  | 2.66       | 4.2     | 0.688  | 0.585987   | 12.25   |
| 5.09   | 2.63  | 1.66  | 4.97       | 23      | 3.582  | 0.0766 *   | 14.73   |
| 6.48   | -1.86 | -1.63 | -2.14      | -96.88  | -6.979 | 0.039202 * | 198.36  |
| 5.03   | -4.79 | -2.14 | -100000000 | -26.26  | -4.476 | 0.066014 * | 32.57   |
| 13.22  | -1.63 | -1.29 | -2.12      | -68.11  | -3.446 | 0.076082   | 171.96  |
| 66.45  | 1.15  | 0.58  | 2.08       | 30.36   | 0.374  | 0.747827   | 161.97  |
| 16.22  | -1.31 | -1.07 | -1.61      | -52.47  | -2.165 | 0.164114   | 238.79  |

|       |       |       |            |         |        |            |         |
|-------|-------|-------|------------|---------|--------|------------|---------|
| 6.86  | -1.14 | -0.7  | -2.71      | -2.78   | -0.387 | 0.756501   | 21.42   |
| 21.12 | -1.1  | -0.95 | -1.26      | -138.84 | -1.082 | 0.467496   | 1597.11 |
| 4.14  | -1.18 | -0.65 | -1.96      | -4.04   | -0.517 | 0.665008   | 32.51   |
| 24.95 | 1.91  | 1.57  | 2.32       | 143.86  | 5.116  | 0.062966 * | 167.91  |
| 75.27 | 1.1   | 0.82  | 1.38       | 44.56   | 0.583  | 0.65934    | 461.67  |
| 6.41  | 1.53  | 0.52  | 3.42       | 5.7     | 0.802  | 0.53344    | 13.28   |
| 4.05  | -2.91 | -1.7  | -7.75      | -20.56  | -3.673 | 0.067015 * | 33.68   |
| 4.57  | -1.11 | -0.83 | -1.55      | -3.43   | -0.591 | 0.617281   | 34.43   |
| 5.1   | 1.24  | 0.67  | 2.2        | 3.89    | 0.624  | 0.602706   | 18.63   |
| 1.9   | -1.51 | 0     | -3.75      | -3.91   | -0.489 | 0.7034     | 17.41   |
| 15.45 | -1.32 | -0.83 | -2.76      | -16.05  | -0.925 | 0.479898   | 63.62   |
| 8.91  | -1.67 | -0.89 | -6.06      | -13.55  | -1.291 | 0.346534   | 32.9    |
| 8.91  | -1.72 | -1.27 | -2.37      | -44.45  | -2.908 | 0.112704   | 93.96   |
| 9.72  | 1.97  | 1.62  | 2.41       | 57.99   | 5.266  | 0.058751 * | 59.14   |
| 2.37  | -2.48 | -1.91 | -3.31      | -25.47  | -5.626 | 0.045125 * | 44.14   |
| 15.13 | 1.23  | 0.83  | 1.76       | 16.21   | 0.895  | 0.477542   | 80.78   |
| 6.12  | 1.21  | 0.42  | 3.71       | 2.83    | 0.349  | 0.761114   | 15.61   |
| 4     | 1.65  | 1.06  | 3.07       | 12.65   | 1.894  | 0.208771   | 23.75   |
| 30.89 | 1.59  | 1.33  | 1.92       | 200.03  | 4.498  | 0.046144   | 308.11  |
| 2.46  | -2.57 | -1.44 | -6.63      | -10.57  | -2.75  | 0.114562   | 14.59   |
| 15.28 | 2.03  | 1.74  | 2.37       | 115.95  | 6.839  | 0.045482 * | 110.46  |
| 5.59  | 1.02  | 0.88  | 1.17       | 1.3     | 0.198  | 0.864221   | 75.12   |
| 8.28  | -2.14 | -0.89 | -100000000 | -12.33  | -1.369 | 0.35464    | 25.02   |
| 6.07  | -2.29 | -0.48 | -100000000 | -5.6    | -0.781 | 0.529505   | 6.47    |
| 3.83  | -1.08 | -0.65 | -2.08      | -1.05   | -0.23  | 0.842415   | 12.97   |
| 4.67  | -1.1  | -0.8  | -1.6       | -2.53   | -0.453 | 0.700911   | 27.98   |
| 8.15  | -1.19 | 0     | -10.63     | -2.91   | -0.202 | 0.860612   | 29.65   |
| 7.82  | -2.81 | -1.51 | -11.87     | -30.49  | -3.059 | 0.098392 * | 46.33   |
| 5.3   | 1.23  | 0.47  | 2.79       | 2.72    | 0.423  | 0.718189   | 10.17   |
| 3.88  | -1.61 | -0.63 | -9.13      | -4.77   | -0.859 | 0.481079   | 12.06   |
| 5.76  | -1.17 | -0.13 | -100000000 | -1.23   | -0.168 | 0.882508   | 11.96   |
| 5.91  | 1.09  | 0.41  | 2.11       | 1.28    | 0.189  | 0.871404   | 13.09   |
| 29.46 | 1.68  | 1.26  | 2.33       | 120.71  | 3.027  | 0.094975   | 151.05  |
| 9.52  | -1.36 | -1.01 | -1.93      | -21.5   | -1.688 | 0.235164   | 76.26   |
| 5.59  | -8.1  | -2.31 | -100000000 | -28.81  | -3.493 | 0.073793 * | 28.93   |
| 8.5   | 1.03  | 0.56  | 1.68       | 1.06    | 0.106  | 0.926727   | 33.66   |

|        |       |       |            |         |        |            |         |
|--------|-------|-------|------------|---------|--------|------------|---------|
| 103.03 | -2.88 | -1.73 | -6.22      | -605.83 | -3.529 | 0.079925 * | 1045.76 |
| 3.04   | -2.17 | -1.35 | -4.28      | -12.22  | -2.768 | 0.109859   | 24.25   |
| 19.5   | -1.01 | -0.79 | -1.35      | -1.39   | -0.065 | 0.956122   | 140.89  |
| 4.29   | 1.12  | 0     | 100000000  | 0.77    | 0.12   | 0.915315   | 9.45    |
| 31.08  | -1.16 | -0.81 | -1.9       | -20.7   | -0.628 | 0.625349   | 143.88  |
| 3.83   | -3.69 | -2.62 | -5.72      | -49.64  | -6.607 | 0.036469 * | 71.68   |
| 9.6    | 1.02  | 0.75  | 1.42       | 1.43    | 0.093  | 0.934783   | 89.82   |
| 10.08  | 2.48  | 1.25  | 5.25       | 23.04   | 2.079  | 0.224789   | 18.17   |
| 4.91   | 2.72  | 0.97  | 100000000  | 13.09   | 1.579  | 0.265615   | 1.21    |
| 9.05   | -1.08 | -0.8  | -1.59      | -3.9    | -0.399 | 0.744849   | 51.41   |
| 4.51   | -1.18 | -0.04 | -3.6       | -2.3    | -0.235 | 0.842529   | 8.01    |
| 6.65   | -1.92 | -0.84 | -100000000 | -8.67   | -1.215 | 0.401129   | 20.05   |
| 4.53   | -2.51 | -1.62 | -4.84      | -23.72  | -3.801 | 0.063048 * | 41.55   |
| 6.54   | 1.02  | 0.78  | 1.33       | 0.91    | 0.1    | 0.929504   | 50.99   |
| 7.39   | 1.02  | 0.63  | 1.6        | 0.71    | 0.074  | 0.947966   | 40.12   |
| 6.08   | 1.43  | 0.1   | 100000000  | 3.23    | 0.394  | 0.732235   | 10.01   |
| 8.28   | -3.08 | -1.38 | -100000000 | -23.66  | -2.721 | 0.18896    | 35.27   |
| 12.28  | 1.13  | 0.96  | 1.35       | 23.04   | 1.21   | 0.352939   | 164.35  |
| 26.68  | -1.53 | -0.88 | -2.71      | -60.65  | -1.284 | 0.341874   | 137.04  |
| 3.42   | -1.48 | -0.9  | -2.72      | -6.44   | -1.3   | 0.323502   | 18.28   |
| 22.38  | -1.31 | -1.01 | -1.76      | -50.65  | -1.729 | 0.229446   | 199.19  |
| 4.93   | -2.69 | -1.6  | -6.92      | -22.54  | -3.551 | 0.075447 * | 39.17   |
| 2.74   | -2.07 | -1.61 | -2.73      | -23.15  | -4.628 | 0.057455 * | 47.27   |
| 7.66   | 1.36  | 0     | 100000000  | 2.37    | 0.241  | 0.83303    | 10.06   |
| 13.85  | 1.16  | 0.14  | 2.52       | 3.51    | 0.239  | 0.844383   | 26.25   |
| 2.3    | -1.43 | -0.74 | -2.82      | -3.59   | -0.938 | 0.453634   | 12.8    |
| 7.66   | -1.64 | -0.45 | -100000000 | -4.45   | -0.524 | 0.669993   | 9.5     |
| 13.84  | -1.57 | 0     | -100000000 | -10.69  | -0.401 | 0.734121   | 6.59    |
| 6.83   | -1.36 | -0.94 | -2.16      | -11.47  | -1.366 | 0.316894   | 43.43   |
| 4.31   | -1.59 | -1.17 | -2.36      | -13.25  | -2.584 | 0.143538   | 35.19   |
| 8.7    | -1.37 | -0.96 | -2.24      | -14.05  | -1.428 | 0.324481   | 50.89   |
| 11.43  | 2.59  | 0.2   | 100000000  | 12.54   | 1.005  | 0.459532   | 11.09   |
| 5.03   | 1     | 0.57  | 2.34       | 0.11    | 0.01   | 0.993042   | 35.62   |
| 6.83   | 1.48  | 0.88  | 2.42       | 10.21   | 1.274  | 0.352264   | 23.92   |
| 4.85   | 1.93  | 0.08  | 100000000  | 4.01    | 0.655  | 0.583404   | 4.61    |
| 5.44   | -1.92 | -1.5  | -2.65      | -30.54  | -5.169 | 0.075399 * | 64.13   |

|        |       |       |            |         |        |            |        |
|--------|-------|-------|------------|---------|--------|------------|--------|
| 5.18   | 1.23  | 0.59  | 2.37       | 3.36    | 0.533  | 0.653104   | 11.36  |
| 13.23  | -2.1  | -0.99 | -100000000 | -21.99  | -1.618 | 0.334092   | 41.65  |
| 7.11   | -2.73 | -1.71 | -6.03      | -37.21  | -4.176 | 0.059668 * | 55.14  |
| 221.33 | -1.43 | -0.76 | -6.21      | -206.23 | -0.846 | 0.516983   | 579.58 |
| 4.5    | -1.23 | 0     | -14.37     | -1.88   | -0.179 | 0.880003   | 19.15  |
| 6.73   | 1.47  | 0.7   | 3.66       | 7.88    | 0.884  | 0.471375   | 14.16  |
| 1.5    | -1.06 | -0.66 | -1.47      | -1.6    | -0.228 | 0.854803   | 23.38  |
| 2.45   | 1.91  | 1.21  | 3.75       | 9.75    | 2.447  | 0.141388   | 7.73   |
| 9.92   | 1.3   | 0.5   | 3.02       | 6.52    | 0.544  | 0.647475   | 27.02  |
| 5.51   | 2.17  | 0.49  | 12.6       | 6.52    | 1.058  | 0.433131   | 5.01   |
| 53.8   | -2.54 | -1.74 | -4.4       | -330.71 | -4.65  | 0.045002 * | 499.7  |
| 2.57   | -1.31 | -0.99 | -1.73      | -6.42   | -1.606 | 0.253164   | 24.88  |
| 2.15   | -1.03 | -0.75 | -1.35      | -0.92   | -0.188 | 0.874003   | 30.39  |
| 9.76   | 1.55  | 0.98  | 2.41       | 18.04   | 1.592  | 0.279741   | 36.46  |
| 4.99   | -2.1  | -1.57 | -3.08      | -29.19  | -4.777 | 0.050459 * | 57.09  |
| 5.65   | 1.05  | 0     | 3.92       | 0.37    | 0.057  | 0.96062    | 7.85   |
| 31.97  | 9.16  | 0     | 100000000  | 32.45   | 1.008  | 0.493893   | 4.23   |
| 6.96   | 2.32  | 1.1   | 6.81       | 15.07   | 1.826  | 0.231361   | 7.72   |
| 6.9    | -1    | -0.61 | -2.14      | -0.09   | -0.012 | 0.992022   | 21.99  |
| 6.25   | -6.38 | -2.19 | -100000000 | -29.58  | -4.238 | 0.086116 * | 35.09  |
| 3.11   | -3.54 | -1.48 | -132.72    | -13.34  | -2.364 | 0.160869   | 22.59  |
| 7.7    | -1.73 | -0.54 | -100000000 | -6.52   | -0.711 | 0.561142   | 19.18  |
| 8.61   | 1.1   | 0.84  | 1.39       | 5.96    | 0.616  | 0.61838    | 58.38  |
| 2.71   | -1.98 | -1.62 | -2.48      | -23.48  | -5.984 | 0.026923 * | 49.25  |
| 5.9    | -1.87 | -1.07 | -4.8       | -14.06  | -1.881 | 0.208171   | 28.51  |
| 2.62   | 5.01  | 1.69  | 100000000  | 7.16    | 2.385  | 0.173335   | 1.67   |
| 11.29  | 1.36  | 1.14  | 1.64       | 52      | 2.967  | 0.100598   | 156.6  |
| 57.59  | 2.12  | 1.62  | 2.86       | 327.07  | 4.622  | 0.05273 *  | 251.15 |

| DMSO    | B112    | baseline mea | baseline mea | combo A112 | combo B112 | experiment r | experiment r | fold change | lower bound c |
|---------|---------|--------------|--------------|------------|------------|--------------|--------------|-------------|---------------|
| 155.64  | 150.86  | 10.6         | 79.75        | 61.74      | 72.54      | 14.89        | -2.08        | -1.51       |               |
| 454.38  | 432.56  | 22.89        | 240.53       | 237.92     | 239.66     | 14.77        | -1.8         | -1.58       |               |
| 418.78  | 348.58  | 70.42        | 915.82       | 865.59     | 889.03     | 38.92        | 2.55         | 1.89        |               |
| 206.1   | 200.89  | 11.7         | 107.12       | 100.4      | 103.91     | 7.99         | -1.93        | -1.65       |               |
| 1931.77 | 1680.55 | 250.85       | 845.56       | 432.96     | 640.36     | 208.57       | -2.62        | -1.57       |               |
| 420.79  | 402.02  | 20.68        | 237.34       | 216.04     | 227.19     | 16.61        | -1.77        | -1.53       |               |
| 1032.23 | 1115.94 | 92.39        | 1162.8       | 2023.92    | 1588.67    | 434.47       | 1.42         | 0.77        |               |
| 1188    | 1384.84 | 202.03       | 1221.79      | 1823.43    | 1519.76    | 303.41       | 1.1          | 0.7         |               |
| 861.14  | 958.08  | 101.58       | 854.96       | 1348.81    | 1101.69    | 248.17       | 1.15         | 0.71        |               |
| 2066.14 | 2375.63 | 317.87       | 2118.05      | 3387.08    | 2751.4     | 634.87       | 1.16         | 0.69        |               |
| 1714.92 | 1692.83 | 73.32        | 2236.27      | 2480.87    | 2359.53    | 149.67       | 1.39         | 1.22        |               |
| 237.43  | 252.14  | 21.2         | 294.47       | 571.96     | 432.34     | 139.99       | 1.71         | 0.79        |               |
| 23.72   | 20.7    | 7.81         | 13.35        | 24.27      | 18.16      | 10.77        | -1.14        | -0.35       |               |
| 735.45  | 712.25  | 29.25        | 675.05       | 420.87     | 548.12     | 128.38       | -1.3         | -0.93       |               |
| 964.89  | 912.03  | 55.98        | 925.08       | 584.43     | 754.75     | 171.81       | -1.21        | -0.86       |               |
| 2823.86 | 2606.43 | 218.68       | 2332.96      | 1803.84    | 2070.29    | 269.21       | -1.26        | -0.99       |               |
| 125.9   | 126.16  | 9.4          | 87.46        | 54.75      | 70.67      | 19.55        | -1.79        | -1.2        |               |
| 406.15  | 442.96  | 40.73        | 649          | 1052.62    | 849.8      | 202.96       | 1.92         | 1.15        |               |

|         |         |        |         |         |         |        |       |       |
|---------|---------|--------|---------|---------|---------|--------|-------|-------|
| 12.46   | 14.51   | 4.22   | 8.96    | 6.43    | 7.79    | 2.49   | -1.86 | -0.86 |
| 398.42  | 382.06  | 17.07  | 245.66  | 187.81  | 216.91  | 30.53  | -1.76 | -1.41 |
| 17.14   | 18.58   | 4.44   | 5.18    | 60.98   | 33.04   | 28     | 1.78  | 0     |
| 37.81   | 34.35   | 22.86  | 28.92   | 10.38   | 18.39   | 15.08  | -1.87 | 0     |
| 195.2   | 176.66  | 20.91  | 226.88  | 155.4   | 191.07  | 39.65  | 1.08  | 0.69  |
| 79.12   | 82.35   | 8.71   | 95.19   | 41.4    | 68.41   | 27.78  | -1.2  | -0.69 |
| 1295.69 | 1237.17 | 61.92  | 1543.61 | 1559.38 | 1549.66 | 43.92  | 1.25  | 1.14  |
| 128     | 121.93  | 15.73  | 70.98   | 66.65   | 68.95   | 11.42  | -1.77 | -1.26 |
| 618.88  | 688.66  | 77.15  | 739.06  | 989.02  | 862.49  | 128.78 | 1.25  | 0.9   |
| 582.41  | 534.35  | 49.22  | 534.82  | 282.96  | 409.43  | 127.61 | -1.31 | -0.83 |
| 397.34  | 408.67  | 16.21  | 425.83  | 390.93  | 410.23  | 27.44  | 1     | 0.88  |
| 815.34  | 865.81  | 54.2   | 870.8   | 1063.65 | 965.3   | 98.48  | 1.11  | 0.91  |
| 369.01  | 354.46  | 20.42  | 414.89  | 367.74  | 391.55  | 26.63  | 1.1   | 0.95  |
| 1760.57 | 1789.87 | 53.05  | 1770.96 | 1206.99 | 1488.95 | 284.51 | -1.2  | -0.91 |
| 121.88  | 115.74  | 8.51   | 195.35  | 68.79   | 131.99  | 64.41  | 1.14  | 0.22  |
| 565.49  | 582.82  | 26.74  | 539.45  | 456.25  | 498.22  | 47.32  | -1.17 | -0.99 |
| 6.54    | 6.41    | 5.92   | 10.32   | 11.72   | 10.86   | 5.88   | 1.69  | 0.16  |
| 94.07   | 106.35  | 19.17  | 75.15   | 82.2    | 78.19   | 12.99  | -1.36 | -0.89 |
| 119.9   | 131.22  | 27.7   | 69.42   | 61.37   | 64.76   | 15.47  | -2.03 | -1.18 |
| 75.7    | 66.2    | 12.37  | 62.56   | 81.21   | 72.64   | 14.6   | 1.1   | 0.68  |
| 306.55  | 314.77  | 22.47  | 443.32  | 481.57  | 462.55  | 25.42  | 1.47  | 1.27  |
| 34.38   | 34.09   | 6.68   | 34.08   | 25.58   | 30.09   | 9.64   | -1.13 | -0.64 |
| 30.57   | 19.48   | 11.63  | 1.4     | 3.77    | 2.49    | 3.06   | -7.81 | -0.14 |
| 71.75   | 61.99   | 12.03  | 74.46   | 88.04   | 80.86   | 9.35   | 1.3   | 0.92  |
| 760.41  | 764.63  | 21.96  | 591.3   | 579.26  | 586.51  | 27.55  | -1.3  | -1.19 |
| 878.66  | 870.31  | 20.86  | 721.8   | 721.05  | 721.52  | 28.42  | -1.21 | -1.12 |
| 13.41   | 17.14   | 7.24   | 15.14   | 13.52   | 14.46   | 6.49   | -1.18 | -0.33 |
| 51.02   | 39.35   | 11.76  | 66.85   | 17.76   | 42.48   | 25.56  | 1.08  | 0.01  |
| 1134.98 | 1020.2  | 114.79 | 937.51  | 350.6   | 643.92  | 295.03 | -1.58 | -0.87 |
| 67.53   | 70.27   | 5.68   | 60.81   | 76.63   | 68.89   | 9.41   | -1.02 | -0.8  |
| 2107.74 | 1912.69 | 194.88 | 1837.24 | 1388.95 | 1612.79 | 230.43 | -1.19 | -0.9  |
| 44.31   | 41.47   | 10.02  | 28.72   | 26.42   | 27.63   | 4.11   | -1.5  | -0.87 |
| 173.45  | 146.03  | 27.77  | 169     | 88.56   | 128.55  | 41.08  | -1.14 | -0.64 |
| 337.38  | 318.47  | 21.65  | 277.39  | 124.7   | 201.69  | 77.96  | -1.58 | -0.95 |
| 303.45  | 298.23  | 10.06  | 280.48  | 161.8   | 221.02  | 60.06  | -1.35 | -0.93 |
| 341.68  | 332.53  | 13.09  | 257.01  | 244.04  | 251.57  | 12.43  | -1.32 | -1.19 |

|         |         |        |         |         |         |        |       |       |
|---------|---------|--------|---------|---------|---------|--------|-------|-------|
| 131.86  | 137.73  | 11.77  | 213.93  | 220.42  | 216.05  | 11.87  | 1.57  | 1.33  |
| 6093.59 | 5906.61 | 199.03 | 4823.2  | 5391.6  | 5101.69 | 300.91 | -1.16 | -1.04 |
| 158.9   | 161.11  | 10.5   | 131.02  | 107.08  | 118.35  | 16.9   | -1.36 | -1.07 |
| 189.9   | 212.2   | 27.07  | 275.38  | 361.99  | 316.93  | 47.28  | 1.49  | 1.06  |
| 112.56  | 110.14  | 7.82   | 78.71   | 72.17   | 75.92   | 10.36  | -1.45 | -1.14 |
| 369.26  | 358.5   | 34.75  | 261.46  | 351.46  | 304.64  | 49.79  | -1.18 | -0.88 |
| 392.86  | 381.85  | 36.85  | 272.5   | 390.1   | 328.86  | 69.13  | -1.16 | -0.82 |
| 95.28   | 104.36  | 10     | 96.62   | 122.95  | 109.24  | 14.31  | 1.05  | 0.79  |
| 4.56    | 4.46    | 2.61   | 4.65    | 2.92    | 3.65    | 2.96   | -1.22 | -0.04 |
| 791.04  | 751.97  | 42.42  | 431.75  | 239.1   | 335.6   | 97.31  | -2.24 | -1.5  |
| 21.82   | 29.34   | 10.57  | 25.58   | 18.09   | 21.93   | 6.6    | -1.34 | -0.51 |
| 3479.68 | 3057.44 | 422.83 | 3229.16 | 1984.62 | 2608.07 | 627.32 | -1.17 | -0.77 |
| 681.8   | 627.86  | 54.53  | 631.04  | 541.16  | 587.68  | 50.04  | -1.07 | -0.87 |
| 22.95   | 18.72   | 8.76   | 15.22   | 16.7    | 15.95   | 7.95   | -1.17 | -0.25 |
| 107.52  | 95.88   | 13.93  | 90.66   | 31.33   | 60.88   | 31.94  | -1.57 | -0.79 |
| 45.34   | 37.19   | 9.01   | 25.18   | 26.04   | 25.58   | 4.95   | -1.45 | -0.82 |
| 309.71  | 285.74  | 28.44  | 286.95  | 166.44  | 226.14  | 63.36  | -1.26 | -0.83 |
| 4.92    | 4.64    | 5.56   | 5.99    | 3.91    | 4.56    | 7.79   | -1.02 | 0     |
| 2277.54 | 2172.6  | 106.1  | 2470.98 | 1696.22 | 2085.12 | 395.91 | -1.04 | -0.78 |
| 20.09   | 18.96   | 3.9    | 15.42   | 9.95    | 13.17   | 4.45   | -1.44 | -0.79 |
| 9.18    | 10.58   | 4.65   | 15.72   | 1.28    | 7.85    | 8.25   | -1.35 | -0.27 |
| 32.62   | 28.12   | 6.68   | 25.93   | 15.89   | 21.02   | 6.84   | -1.34 | -0.7  |
| 330.21  | 329.16  | 10.48  | 324.02  | 338.36  | 329.86  | 19.47  | 1     | 0.89  |
| 25.95   | 23.96   | 5.28   | 30.78   | 27.61   | 28.79   | 8.09   | 1.2   | 0.6   |
| 109.57  | 103.31  | 8.4    | 147.55  | 84.68   | 115.97  | 32.03  | 1.12  | 0.61  |
| 393.78  | 359.96  | 34.17  | 353.96  | 226.56  | 290.36  | 64.94  | -1.24 | -0.87 |
| 18.28   | 32.34   | 14.58  | 32.22   | 34.22   | 33.36   | 4.3    | 1.03  | 0.56  |
| 158.02  | 162.33  | 9.6    | 102.87  | 125.94  | 113.13  | 15.62  | -1.43 | -1.14 |
| 20.44   | 28.36   | 8.98   | 21.89   | 18.15   | 20.14   | 3.19   | -1.41 | -0.66 |
| 322.26  | 306.67  | 21.48  | 191.75  | 182.77  | 187.1   | 20.14  | -1.64 | -1.34 |
| 17.76   | 17.93   | 2.78   | 28.77   | 15.74   | 22.35   | 7.14   | 1.25  | 0.58  |
| 62.48   | 68.71   | 8.37   | 90.02   | 83.7    | 86.78   | 5.24   | 1.26  | 1.02  |
| 11.14   | 8.84    | 3.76   | 27.75   | 4.74    | 15.8    | 12.4   | 1.79  | 0     |
| 53.74   | 47.84   | 7.05   | 55.65   | 25.19   | 40.35   | 16.23  | -1.19 | -0.66 |
| 4.31    | 10.99   | 7.63   | 4.98    | 20.75   | 11.74   | 9.14   | 1.07  | 0     |
| 13.12   | 16.82   | 6.91   | 17.57   | 14.78   | 16.05   | 8.46   | -1.05 | -0.3  |

|          |          |        |          |          |          |         |       |       |
|----------|----------|--------|----------|----------|----------|---------|-------|-------|
| 609.02   | 614.33   | 18.49  | 732.96   | 905      | 818.14   | 90.39   | 1.33  | 1.08  |
| 134      | 118.47   | 20.87  | 109.44   | 72.76    | 92.95    | 25.25   | -1.27 | -0.77 |
| 1828.37  | 1585.85  | 243.03 | 1771.15  | 935.96   | 1353.09  | 422.39  | -1.17 | -0.7  |
| 930.09   | 919.07   | 40.52  | 917.65   | 902.73   | 909.31   | 49.02   | -1.01 | -0.9  |
| 922.04   | 796.66   | 130.9  | 738.53   | 442.08   | 587.25   | 158.28  | -1.36 | -0.84 |
| 661.83   | 657.97   | 18.19  | 531.55   | 984.01   | 757.27   | 226.41  | 1.15  | 0.58  |
| 431.89   | 477.26   | 48.6   | 507.33   | 593.79   | 543.9    | 54.48   | 1.14  | 0.9   |
| 1025.44  | 958.41   | 70.55  | 919.26   | 877.03   | 899.23   | 28.65   | -1.07 | -0.93 |
| 150.52   | 154.38   | 8.6    | 125.36   | 85.34    | 105.43   | 21.96   | -1.46 | -1.07 |
| 1312.28  | 991.05   | 320.76 | 1936.69  | 1765.94  | 1842.51  | 119.35  | 1.86  | 1.19  |
| 802.23   | 781.88   | 27.14  | 621.99   | 442.89   | 532.91   | 91.64   | -1.47 | -1.14 |
| 381.84   | 340.54   | 42.36  | 233.49   | 152.1    | 194.03   | 44.94   | -1.76 | -1.18 |
| 924.95   | 970.26   | 48.95  | 908.37   | 1663.78  | 1285.39  | 377.85  | 1.32  | 0.68  |
| 1688.22  | 1803.7   | 121.65 | 1567.38  | 1506.77  | 1535.9   | 54.1    | -1.17 | -1.03 |
| 22.13    | 18.92    | 7.7    | 16.01    | 27.41    | 19.9     | 12.02   | 1.05  | 0.01  |
| 21.31    | 20.53    | 6.19   | 25.83    | 26.25    | 26.07    | 9.59    | 1.27  | 0.47  |
| 20.86    | 16.62    | 7.26   | 17.2     | 14.05    | 15.46    | 7.15    | -1.08 | -0.27 |
| 15.57    | 19.4     | 12.61  | 20.07    | 21.58    | 20.91    | 11.5    | 1.08  | 0.1   |
| 307.75   | 292.99   | 20.45  | 242.42   | 177.88   | 211.04   | 36.16   | -1.39 | -1.05 |
| 896.47   | 872.37   | 25.14  | 939.49   | 604.1    | 772.46   | 170.61  | -1.13 | -0.82 |
| 9.38     | 9.06     | 6.32   | 9.64     | 7.71     | 8.79     | 5.73    | -1.03 | 0     |
| 13194.96 | 13088.63 | 183.47 | 14037.51 | 11251.51 | 12647.51 | 1433.98 | -1.03 | -0.87 |
| 15.61    | 12.32    | 4.66   | 12.21    | 12.22    | 12.22    | 3.48    | -1.01 | -0.36 |
| 18.61    | 21.53    | 4.34   | 29.14    | 17.08    | 23.16    | 7.49    | 1.08  | 0.48  |
| 37.79    | 41.68    | 7.86   | 45.96    | 38.12    | 42.13    | 6.61    | 1.01  | 0.68  |
| 61.43    | 59.68    | 5.12   | 95.71    | 89.28    | 92.84    | 4.95    | 1.56  | 1.32  |
| 14.24    | 10.23    | 5.12   | 7.93     | 6.73     | 7.12     | 2.24    | -1.44 | -0.25 |
| 75.33    | 59.84    | 15.69  | 32.06    | 14.62    | 23.41    | 10.06   | -2.56 | -1.18 |
| 59.57    | 59.84    | 4.94   | 82.26    | 39.53    | 61.41    | 22.68   | 1.03  | 0.4   |
| 48.54    | 30.28    | 18.32  | 15.28    | 37.7     | 26.53    | 11.47   | -1.14 | -0.01 |
| 188.79   | 188.22   | 8.35   | 146.61   | 136.91   | 142.79   | 8.85    | -1.32 | -1.17 |
| 584.3    | 600.71   | 22.41  | 585.5    | 801.47   | 692.25   | 109.65  | 1.15  | 0.85  |
| 21.44    | 19.95    | 3.86   | 28.22    | 27.2     | 27.73    | 4.36    | 1.39  | 0.93  |
| 138.2    | 149.99   | 13.14  | 158.84   | 261.14   | 208.2    | 52.85   | 1.39  | 0.8   |
| 1646.39  | 1611.9   | 55.12  | 2273.31  | 2800.62  | 2524.47  | 278.66  | 1.57  | 1.27  |
| 29.8     | 25.51    | 5.07   | 21.86    | 18.92    | 20.45    | 4.09    | -1.25 | -0.77 |



|         |         |        |         |         |         |        |       |       |
|---------|---------|--------|---------|---------|---------|--------|-------|-------|
| 36.62   | 33.93   | 11.33  | 38.25   | 23.85   | 31.02   | 15.19  | -1.09 | -0.41 |
| 26.56   | 21.83   | 8.02   | 7.1     | 5.32    | 5.78    | 5.52   | -3.77 | -1    |
| 1729.67 | 1843.03 | 122.96 | 1567.31 | 1559.86 | 1563.93 | 55.45  | -1.18 | -1.04 |
| 6733.48 | 6724.93 | 96.14  | 6978.11 | 5863.88 | 6419.94 | 610.02 | -1.05 | -0.9  |
| 175.01  | 181.37  | 10.5   | 226.15  | 123.94  | 175.19  | 51.77  | -1.04 | -0.69 |
| 385.09  | 403     | 20.27  | 341.43  | 372.64  | 357.19  | 21.12  | -1.13 | -0.99 |
| 481.72  | 462.04  | 26.45  | 552.77  | 769.29  | 657.81  | 111.42 | 1.42  | 1.02  |
| 1343.75 | 1300.75 | 45.15  | 1510.63 | 1746.31 | 1624.89 | 122.1  | 1.25  | 1.08  |
| 1934.05 | 1924.43 | 18.81  | 1737.89 | 2683.11 | 2210.16 | 472.37 | 1.15  | 0.74  |
| 156.93  | 143.22  | 16.27  | 186.49  | 169.94  | 179.47  | 13.91  | 1.25  | 1.01  |
| 540.76  | 578.33  | 57.01  | 516.83  | 563.27  | 542.61  | 42.05  | -1.07 | -0.86 |
| 1142.06 | 984.69  | 157.13 | 1071.52 | 1017.5  | 1044.31 | 37.91  | 1.06  | 0.83  |
| 362.36  | 329.55  | 32.79  | 218.93  | 298.25  | 258.5   | 40.04  | -1.27 | -0.95 |
| 357.6   | 345.51  | 16.09  | 247.18  | 222.43  | 235.06  | 20.61  | -1.47 | -1.26 |
| 705.65  | 648.36  | 58.02  | 767.08  | 530.48  | 647.21  | 123.94 | -1    | -0.73 |
| 42.41   | 42.37   | 7.27   | 45.81   | 25.59   | 35.21   | 11.89  | -1.2  | -0.69 |
| 226.41  | 224.77  | 8.69   | 294.16  | 329.31  | 310.35  | 19.76  | 1.38  | 1.22  |
| 25.73   | 20.2    | 7.97   | 19.97   | 28.02   | 23.93   | 10.68  | 1.18  | 0.29  |
| 4.79    | 4.01    | 2.76   | 2.63    | 2.55    | 2.59    | 1.33   | -1.55 | 0     |
| 1       | 1       | 1.16   | 1       | 1       | 1       | 0.98   | 1     | 0     |
| 232.56  | 229.02  | 11.41  | 149.95  | 101.75  | 125.99  | 26.13  | -1.82 | -1.34 |
| 35.61   | 28.98   | 8.53   | 27.25   | 11.63   | 19.22   | 8.52   | -1.51 | -0.64 |
| 77.84   | 73.68   | 10.13  | 98.98   | 78.52   | 89.28   | 12.96  | 1.21  | 0.86  |
| 107.92  | 108.43  | 4.24   | 90.63   | 111.1   | 100.35  | 11.44  | -1.08 | -0.9  |
| 24.8    | 28.23   | 6.11   | 26.16   | 23.35   | 25.04   | 4.32   | -1.13 | -0.68 |
| 27      | 19.4    | 7.96   | 6.55    | 2.68    | 4.16    | 4.12   | -4.66 | -1.07 |
| 169.05  | 165.09  | 9.84   | 143.27  | 94.9    | 118.55  | 26.49  | -1.39 | -1    |
| 401.38  | 386.25  | 17     | 551.33  | 651.51  | 600.16  | 52.07  | 1.55  | 1.31  |
| 2673.46 | 2540.02 | 134.81 | 2370.23 | 1741.53 | 2065.1  | 329.6  | -1.23 | -0.96 |
| 4.89    | 3.45    | 2.57   | 3.59    | 5.44    | 4.56    | 2.75   | 1.32  | 0.01  |
| 998.61  | 1027.16 | 32.69  | 752.21  | 1269.3  | 1009.03 | 259.88 | -1.02 | -0.71 |
| 12.53   | 14.98   | 4.5    | 28.62   | 41.74   | 35.37   | 6.77   | 2.36  | 1.36  |
| 63.98   | 58.87   | 8.62   | 45.93   | 79.7    | 62.8    | 17.68  | 1.07  | 0.55  |
| 50.11   | 44.47   | 7.78   | 37.12   | 33.63   | 35.83   | 3.98   | -1.24 | -0.85 |
| 17.54   | 19.49   | 3.74   | 18.85   | 30.23   | 24.7    | 5.98   | 1.27  | 0.71  |
| 1056.77 | 1099.22 | 52.52  | 1250.06 | 1968.48 | 1601.96 | 365.69 | 1.46  | 0.91  |

|         |         |       |         |         |         |        |       |       |
|---------|---------|-------|---------|---------|---------|--------|-------|-------|
| 41.05   | 24.32   | 17.44 | 38.28   | 32.31   | 35.35   | 5.14   | 1.45  | 0.63  |
| 534.11  | 579.47  | 52.02 | 587.83  | 843.95  | 714.52  | 129.57 | 1.23  | 0.84  |
| 18.47   | 28.54   | 11.79 | 21.49   | 31.39   | 26.54   | 7.5    | -1.08 | -0.33 |
| 36.05   | 29.46   | 7.16  | 43.53   | 37.87   | 40.91   | 6.1    | 1.39  | 0.89  |
| 168.78  | 162.11  | 7.79  | 111.82  | 102.94  | 107.03  | 8.42   | -1.51 | -1.31 |
| 39.23   | 33.48   | 6.42  | 24.77   | 14.7    | 19.42   | 6.49   | -1.72 | -0.96 |
| 505.49  | 487.81  | 18.05 | 329.61  | 339.79  | 333.71  | 12.21  | -1.46 | -1.34 |
| 4597.43 | 4632.81 | 95.49 | 4503.35 | 4058.36 | 4291.58 | 271.07 | -1.08 | -0.97 |
| 41.25   | 45.29   | 7.22  | 35.66   | 41.45   | 38      | 6.57   | -1.19 | -0.8  |
| 129.27  | 93.18   | 38.21 | 106     | 68.96   | 86.12   | 22.79  | -1.08 | -0.34 |
| 1522.22 | 1446.02 | 80.96 | 1219.58 | 993.2   | 1106.86 | 118.44 | -1.31 | -1.08 |
| 442.91  | 406.68  | 37.43 | 438.29  | 375.25  | 407.22  | 37.33  | 1     | 0.81  |
| 46.83   | 44.81   | 7.84  | 54.7    | 61.84   | 58.34   | 11.7   | 1.3   | 0.81  |
| 232.59  | 213.65  | 19.99 | 247.62  | 231.54  | 240.2   | 14.72  | 1.12  | 0.94  |
| 517.07  | 583.31  | 68.26 | 614.45  | 788.93  | 701.86  | 87.23  | 1.2   | 0.9   |
| 62.59   | 47.35   | 16.56 | 37.53   | 27.37   | 33.01   | 11.29  | -1.43 | -0.55 |
| 537.71  | 549.36  | 16.89 | 449.47  | 508.5   | 475.66  | 36.43  | -1.15 | -1.01 |
| 1       | 1.88    | 1.95  | 1       | 1       | 1       | 1.61   | -1.88 | 0     |
| 116.52  | 116.94  | 10.21 | 127.98  | 79.69   | 102.52  | 26.91  | -1.14 | -0.77 |
| 20.12   | 11.45   | 8.7   | 12.63   | 6.36    | 9.28    | 3.85   | -1.23 | 0     |
| 68.34   | 70.3    | 10.01 | 53.44   | 36.7    | 45.14   | 13.12  | -1.56 | -0.97 |
| 168.22  | 164.82  | 7.19  | 161.65  | 105.71  | 134.19  | 28.8   | -1.23 | -0.9  |
| 1145.34 | 1113.65 | 41.65 | 1219.34 | 1251.47 | 1230.38 | 43.55  | 1.1   | 1.02  |
| 1122.94 | 1043.79 | 79.71 | 795.35  | 601.85  | 699.55  | 98.85  | -1.49 | -1.16 |
| 39.43   | 48.92   | 12.38 | 30.51   | 41.97   | 34.58   | 10.76  | -1.41 | -0.72 |
| 663.81  | 597.43  | 67.36 | 684.03  | 533     | 610.82  | 79.01  | 1.02  | 0.76  |
| 204.86  | 194.74  | 13.64 | 274.75  | 147.1   | 211.29  | 65.82  | 1.08  | 0.53  |
| 53.47   | 63.4    | 13.88 | 58      | 41.46   | 50.73   | 18.91  | -1.25 | -0.65 |
| 565.89  | 597.65  | 35.55 | 828     | 958.41  | 892.16  | 66.74  | 1.49  | 1.27  |
| 223.34  | 207.45  | 16.95 | 188.21  | 127.61  | 158.08  | 32.31  | -1.31 | -0.95 |
| 8.65    | 12.59   | 4.3   | 9.87    | 3.51    | 5.96    | 4.55   | -2.11 | -0.66 |
| 3.65    | 3.45    | 2.47  | 1.73    | 1.27    | 1.55    | 1.41   | -2.23 | 0     |
| 83.81   | 77.33   | 8.76  | 63.38   | 50.1    | 56.11   | 9.97   | -1.38 | -0.99 |
| 10.05   | 12.09   | 5.63  | 4.95    | 8.1     | 6.85    | 3.94   | -1.77 | -0.37 |
| 862.31  | 855.56  | 14.43 | 660.2   | 544.03  | 602.9   | 59.77  | -1.42 | -1.22 |
| 71.75   | 80.58   | 12.65 | 77.12   | 167.67  | 122.03  | 46.21  | 1.51  | 0.56  |

|         |         |       |         |         |         |        |       |       |
|---------|---------|-------|---------|---------|---------|--------|-------|-------|
| 1       | 3       | 3.55  | 4.91    | 4.63    | 4.76    | 1.98   | 1.59  | 0.33  |
| 8.45    | 14.23   | 7.3   | 13.66   | 9.44    | 11.37   | 8.18   | -1.25 | -0.18 |
| 697.22  | 603.58  | 93.53 | 588.72  | 390.98  | 490.87  | 105.66 | -1.23 | -0.81 |
| 23.47   | 24.5    | 5.7   | 25.67   | 22.48   | 24.24   | 8.37   | -1.01 | -0.52 |
| 112.16  | 101.77  | 12.28 | 96.94   | 52.11   | 75.19   | 23.4   | -1.35 | -0.84 |
| 58.84   | 59.15   | 4.96  | 60.35   | 69.06   | 64.65   | 6.59   | 1.09  | 0.87  |
| 281.74  | 272.14  | 12.76 | 178.69  | 98.03   | 138.54  | 42.41  | -1.96 | -1.29 |
| 7.57    | 8.35    | 1.82  | 2.33    | 10.75   | 6.31    | 4.54   | -1.32 | -0.53 |
| 2867.65 | 2937.57 | 81.03 | 2117.53 | 2565.06 | 2336.82 | 230.7  | -1.26 | -1.07 |
| 54.51   | 64.28   | 12.21 | 74.9    | 177.1   | 125.89  | 51.38  | 1.96  | 0.63  |
| 62.6    | 76.82   | 15.18 | 93.47   | 193.62  | 143.42  | 50.26  | 1.87  | 0.76  |
| 211.62  | 205.37  | 9.69  | 353.23  | 261.84  | 307.09  | 49.04  | 1.5   | 1.09  |
| 77.84   | 81.94   | 11.68 | 109.43  | 181.81  | 144.78  | 38.08  | 1.77  | 0.97  |
| 42.66   | 39.08   | 6.07  | 30.62   | 30.77   | 30.71   | 3.76   | -1.27 | -0.9  |
| 39.86   | 35.63   | 6.51  | 35.14   | 27.93   | 31.02   | 7.51   | -1.15 | -0.7  |
| 254.76  | 227.01  | 28.05 | 166.42  | 123.45  | 145.84  | 24.68  | -1.56 | -1.11 |
| 115.98  | 105.78  | 12.32 | 49.08   | 130.31  | 87.98   | 43.36  | -1.2  | -0.64 |
| 353.17  | 341.18  | 14.32 | 350.87  | 255.09  | 302.85  | 48.74  | -1.13 | -0.88 |
| 968.61  | 904.98  | 68.48 | 1147.88 | 695.89  | 919.42  | 232.13 | 1.02  | 0.59  |
| 79.47   | 83.54   | 6.39  | 60.83   | 30.89   | 45.99   | 16.19  | -1.82 | -1.13 |
| 470.4   | 455.14  | 16.11 | 438.27  | 420.13  | 431.01  | 15.24  | -1.06 | -0.97 |
| 34.85   | 28      | 8.22  | 22.93   | 32.38   | 27.02   | 6.4    | -1.04 | -0.5  |
| 259.87  | 257.1   | 8.13  | 217.65  | 149.82  | 183.91  | 34.81  | -1.4  | -1.06 |
| 39.27   | 30.19   | 9.71  | 40.06   | 33.16   | 37.36   | 10.51  | 1.24  | 0.59  |
| 79.55   | 89.26   | 11.57 | 43.89   | 29.45   | 36.09   | 9.15   | -2.47 | -1.62 |
| 1059.51 | 998.24  | 63.05 | 2209.68 | 2359.44 | 2283.68 | 101.92 | 2.29  | 2.02  |
| 408.78  | 407.74  | 7.26  | 191.13  | 136.85  | 163.84  | 29.24  | -2.49 | -1.92 |
| 24.67   | 24.7    | 3.83  | 5.21    | 2.38    | 3.56    | 3.36   | -6.94 | -2.57 |
| 305.59  | 290.97  | 17.21 | 559.32  | 507.68  | 533.02  | 35.95  | 1.83  | 1.58  |
| 376.42  | 380.71  | 14.45 | 1079.93 | 1192.06 | 1133.01 | 61.65  | 2.98  | 2.66  |
| 612.26  | 606.68  | 18.58 | 2020.97 | 2157.85 | 2089.66 | 70.42  | 3.44  | 3.19  |
| 2466.65 | 2461.35 | 50.57 | 1458.04 | 1107.39 | 1283.47 | 181.58 | -1.92 | -1.55 |
| 219.81  | 209.26  | 13.16 | 113.47  | 113.81  | 113.6   | 9.26   | -1.84 | -1.56 |
| 19.3    | 18.36   | 6.59  | 50.06   | 58.13   | 53.76   | 7.63   | 2.93  | 1.71  |
| 477.36  | 490.61  | 18.42 | 204.59  | 229.04  | 213.89  | 18.24  | -2.29 | -1.98 |
| 141.7   | 135.97  | 6.31  | 73.15   | 51.36   | 61.85   | 11.72  | -2.2  | -1.66 |

|         |         |        |         |         |         |        |       |       |
|---------|---------|--------|---------|---------|---------|--------|-------|-------|
| 683.44  | 593.44  | 90.18  | 1805.76 | 1396.05 | 1601.78 | 210.36 | 2.7   | 1.94  |
| 15.11   | 11.13   | 5.63   | 35.83   | 36.1    | 35.96   | 3.55   | 3.23  | 1.71  |
| 14.84   | 16.49   | 4.4    | 49      | 41.81   | 45.56   | 4.36   | 2.76  | 1.84  |
| 478.33  | 447.41  | 33.05  | 237.47  | 112.79  | 175.64  | 64.31  | -2.55 | -1.56 |
| 36.5    | 36.43   | 1.6    | 10.7    | 8.93    | 10.15   | 5.08   | -3.59 | -1.96 |
| 947.07  | 945.78  | 27.51  | 1737.44 | 1613.05 | 1681.45 | 80.04  | 1.78  | 1.62  |
| 835.57  | 764.01  | 74.13  | 1526.93 | 1482.04 | 1502.57 | 74.8   | 1.97  | 1.66  |
| 1034.34 | 928.43  | 108.46 | 479.93  | 360.21  | 421.22  | 72.08  | -2.2  | -1.59 |
| 608.72  | 600.16  | 24.22  | 988.48  | 1054.6  | 1022.99 | 52.19  | 1.7   | 1.53  |
| 13.29   | 10.67   | 3.29   | 30.43   | 34.31   | 32.05   | 4.24   | 3     | 1.86  |
| 102.28  | 94.27   | 11.26  | 33.22   | 39.07   | 36.72   | 7.8    | -2.57 | -1.77 |
| 190.41  | 189.79  | 8.01   | 90.37   | 99.61   | 94.95   | 6.83   | -2    | -1.75 |
| 97.7    | 107.08  | 10.99  | 228.52  | 187.74  | 207.48  | 22.45  | 1.94  | 1.51  |
| 28.22   | 28.77   | 3.19   | 2.1     | 7.37    | 4.12    | 3.66   | -6.98 | -2.75 |
| 22.23   | 19.34   | 4.12   | 46.44   | 42.31   | 44.06   | 4.74   | 2.28  | 1.59  |
| 8251.6  | 8404.87 | 243.7  | 4018.14 | 3312.82 | 3666.03 | 451.65 | -2.29 | -1.89 |
| 1125.5  | 1076.71 | 52.3   | 615.73  | 633.28  | 625.08  | 27.99  | -1.72 | -1.54 |
| 45.03   | 40.43   | 6.21   | 12.56   | 6.77    | 10.24   | 5.6    | -3.95 | -1.94 |
| 869.48  | 816.97  | 54.26  | 470.42  | 410.95  | 442.06  | 35.5   | -1.85 | -1.56 |
| 38.46   | 33.82   | 5.09   | 13.04   | 8.63    | 10.71   | 4.22   | -3.16 | -1.77 |
| 67.34   | 70.27   | 4.26   | 34.99   | 28.15   | 31.32   | 4.62   | -2.24 | -1.76 |
| 83.04   | 82.17   | 6.63   | 153.82  | 141.47  | 147.05  | 9.03   | 1.79  | 1.52  |
| 999.45  | 909.94  | 89.76  | 2224.52 | 1975.72 | 2099.45 | 133.8  | 2.31  | 1.91  |
| 3.77    | 1.78    | 2.96   | 18.58   | 25.88   | 22.05   | 4.49   | 12.39 | 3.06  |
| 1403.43 | 1402.1  | 21.75  | 891.08  | 805.28  | 850.13  | 48.54  | -1.65 | -1.5  |
| 536.94  | 518.35  | 37.42  | 1220.3  | 1223.67 | 1221.97 | 71.53  | 2.36  | 2.03  |
| 621.71  | 598.08  | 44.93  | 1661.93 | 1549.67 | 1606.52 | 112.09 | 2.69  | 2.27  |
| 140.42  | 133.96  | 13.23  | 47.35   | 61.44   | 53.95   | 10.91  | -2.48 | -1.77 |
| 355.82  | 372.98  | 19.89  | 1267.78 | 1339.37 | 1307.49 | 40.12  | 3.51  | 3.18  |
| 419.21  | 403.12  | 17.65  | 243.75  | 197.57  | 220.54  | 26.07  | -1.83 | -1.51 |
| 796.92  | 793.22  | 22.52  | 1322.46 | 1399.97 | 1350.69 | 63.21  | 1.7   | 1.55  |
| 204.44  | 229.32  | 26.73  | 470.13  | 548.02  | 508.19  | 40.82  | 2.22  | 1.77  |
| 41.61   | 45.74   | 6.42   | 89.72   | 87.08   | 88.55   | 5.16   | 1.94  | 1.54  |
| 66.99   | 68.46   | 5.98   | 36.82   | 31.27   | 34.14   | 4.56   | -2.01 | -1.56 |
| 106.38  | 107.34  | 5.23   | 51.16   | 62.9    | 56.34   | 7.9    | -1.91 | -1.52 |
| 37.66   | 35.71   | 5.03   | 83.84   | 83.86   | 83.85   | 3.43   | 2.35  | 1.88  |

|         |         |        |         |         |         |        |       |       |
|---------|---------|--------|---------|---------|---------|--------|-------|-------|
| 52.66   | 51.76   | 4.93   | 26.03   | 23.26   | 24.5    | 5.07   | -2.11 | -1.5  |
| 434.83  | 475.15  | 43.53  | 810.95  | 958.9   | 882.65  | 78.34  | 1.86  | 1.5   |
| 38.5    | 37.33   | 4.15   | 75.33   | 69.54   | 72.59   | 5.98   | 1.94  | 1.56  |
| 52.13   | 48.18   | 6.91   | 17.81   | 10.81   | 13.79   | 7.25   | -3.49 | -1.76 |
| 62.32   | 68.27   | 7.4    | 28.52   | 27.91   | 28.27   | 2.91   | -2.41 | -1.88 |
| 44.79   | 45.78   | 6.45   | 7.49    | 11.88   | 9.92    | 3.6    | -4.62 | -2.69 |
| 23.23   | 22.41   | 4.06   | 47      | 47.99   | 47.45   | 5.22   | 2.12  | 1.52  |
| 412.33  | 389.09  | 24     | 710.71  | 726.04  | 715.7   | 15.66  | 1.84  | 1.66  |
| 5.93    | 7.72    | 3.48   | 34.23   | 27.97   | 31.35   | 4.58   | 4.06  | 2.18  |
| 46.59   | 52.47   | 8.82   | 139.32  | 176.21  | 156.33  | 20.4   | 2.98  | 2.11  |
| 42.47   | 41.85   | 4.59   | 15.59   | 12.4    | 13.84   | 5.36   | -3.02 | -1.77 |
| 135.09  | 138.56  | 8.58   | 229.4   | 269.72  | 249.14  | 21.31  | 1.8   | 1.5   |
| 40.55   | 46.07   | 6.16   | 21.97   | 12.27   | 17.14   | 5.49   | -2.69 | -1.64 |
| 1948.5  | 1929.42 | 37.58  | 1611.67 | 1435.95 | 1526.25 | 94.62  | -1.26 | -1.14 |
| 89.12   | 92.78   | 8.92   | 60.95   | 73.05   | 67.08   | 7.35   | -1.38 | -1.09 |
| 164.08  | 166.06  | 13.67  | 229.97  | 299.75  | 264.17  | 38.13  | 1.59  | 1.18  |
| 2228.24 | 2160.51 | 78.73  | 4608.34 | 3713.91 | 4212.55 | 519.67 | 1.95  | 1.54  |
| 21.06   | 26.81   | 7.41   | 41.21   | 25.88   | 33.76   | 8.11   | 1.26  | 0.67  |
| 37.49   | 46.47   | 11.33  | 41.42   | 59.1    | 50.78   | 10.31  | 1.09  | 0.65  |
| 136.29  | 139.41  | 8.67   | 107.22  | 51.33   | 78.91   | 29     | -1.77 | -1.09 |
| 2078.79 | 2286.54 | 222.5  | 2968.59 | 3777.99 | 3363.02 | 424.75 | 1.47  | 1.12  |
| 47.99   | 48.17   | 4.33   | 129.76  | 171.77  | 149.42  | 22.88  | 3.1   | 2.25  |
| 32.33   | 21.44   | 11.98  | 8.7     | 15.81   | 12.84   | 4.79   | -1.67 | -0.13 |
| 41.24   | 38.81   | 5.22   | 30.35   | 30.38   | 30.36   | 5.45   | -1.28 | -0.89 |
| 1572.54 | 1200.58 | 371.46 | 2470.25 | 1104.56 | 1788.03 | 686.12 | 1.49  | 0.51  |
| 417.59  | 433.06  | 21.86  | 613.71  | 672.92  | 642.94  | 34.67  | 1.48  | 1.31  |
| 169.3   | 161.18  | 8.82   | 142.88  | 183.55  | 162.12  | 21.79  | 1.01  | 0.77  |
| 46.78   | 43.92   | 3.65   | 35.34   | 15.33   | 25.39   | 10.27  | -1.73 | -1.01 |
| 15.44   | 17.21   | 5.4    | 27.44   | 27.19   | 27.3    | 4.85   | 1.59  | 0.92  |
| 22.75   | 17.31   | 5.52   | 18.68   | 22.18   | 19.81   | 5.17   | 1.14  | 0.57  |
| 13.22   | 14.13   | 3.92   | 20.09   | 29.87   | 25.37   | 7.01   | 1.79  | 0.88  |
| 217.79  | 208.94  | 12.27  | 145.72  | 133.39  | 140.13  | 9.53   | -1.49 | -1.29 |
| 33.68   | 33.19   | 3.02   | 7.83    | 22.76   | 15.11   | 7.67   | -2.2  | -1.17 |
| 180.4   | 175.41  | 14.7   | 114.87  | 94.68   | 105.04  | 14.06  | -1.67 | -1.3  |
| 253.4   | 207.02  | 46.52  | 249.32  | 123.72  | 186.64  | 63.98  | -1.11 | -0.58 |
| 207.98  | 224.17  | 18.01  | 189.43  | 223.48  | 205.35  | 19.85  | -1.09 | -0.89 |

|        |         |        |        |         |         |       |       |       |
|--------|---------|--------|--------|---------|---------|-------|-------|-------|
| 23.18  | 22.41   | 2.12   | 34.01  | 33.78   | 33.91   | 2.67  | 1.51  | 1.24  |
| 1351.8 | 1474.83 | 126.61 | 1564.5 | 1589.65 | 1572.85 | 50.44 | 1.07  | 0.92  |
| 20.09  | 26.19   | 6.62   | 14.85  | 36.2    | 25.61   | 10.83 | -1.02 | -0.48 |
| 147.26 | 158.22  | 12.97  | 266.7  | 326.16  | 295.97  | 31.46 | 1.87  | 1.49  |
| 448.24 | 455.88  | 13.48  | 471.5  | 366.56  | 418.64  | 54.68 | -1.09 | -0.89 |
| 8.56   | 10.75   | 3.08   | 16.79  | 15.89   | 16.3    | 4.68  | 1.52  | 0.72  |
| 29.79  | 31.32   | 3.86   | 25.38  | 19.76   | 22.56   | 3.41  | -1.39 | -1.01 |
| 32.64  | 33.5    | 3.58   | 42.76  | 25.2    | 33.8    | 9.95  | 1.01  | 0.51  |
| 14.1   | 16.12   | 3.59   | 8.14   | 29.58   | 18.68   | 11.19 | 1.16  | 0.02  |
| 5.41   | 11.64   | 7.77   | 2.39   | 2.96    | 2.64    | 2.15  | -4.41 | 0     |
| 68.48  | 65.68   | 7.89   | 57.78  | 37.51   | 46.92   | 12.51 | -1.4  | -0.91 |
| 35.06  | 33.88   | 5.55   | 40.08  | 17.64   | 29.29   | 12.73 | -1.16 | -0.62 |
| 118.54 | 106.42  | 12.42  | 83.11  | 90.33   | 86.91   | 6.09  | -1.22 | -0.96 |
| 60.24  | 59.69   | 5.18   | 104    | 61.49   | 82.41   | 22.33 | 1.38  | 0.76  |
| 40.33  | 42.74   | 3.86   | 27.33  | 32.5    | 30.12   | 3.21  | -1.42 | -1.13 |
| 62.42  | 71.32   | 9.94   | 131.3  | 127.11  | 129.17  | 9.57  | 1.81  | 1.42  |
| 11.11  | 13.55   | 5.3    | 21.12  | 10.13   | 16.3    | 7.88  | 1.2   | 0.23  |
| 15.45  | 19.55   | 5.35   | 29.2   | 38.62   | 34.04   | 5.31  | 1.74  | 1.08  |
| 370.99 | 339.49  | 31.99  | 542.77 | 471.36  | 507.07  | 40.04 | 1.49  | 1.22  |
| 19.81  | 17.3    | 2.95   | 15.32  | 9.4     | 12.48   | 3.47  | -1.39 | -0.84 |
| 113.72 | 112.08  | 7.34   | 200.94 | 178.77  | 190.28  | 15.74 | 1.7   | 1.42  |
| 77.08  | 75.91   | 3.44   | 53.88  | 68.98   | 61.64   | 8.34  | -1.23 | -0.99 |
| 21.82  | 23.12   | 3.55   | 28.54  | 27.72   | 28.25   | 2.43  | 1.22  | 0.93  |
| 12.68  | 9.96    | 3.83   | 13.48  | 19.97   | 16.81   | 3.91  | 1.69  | 0.85  |
| 16.09  | 14.72   | 2.48   | 11.47  | 11.53   | 11.5    | 2.51  | -1.28 | -0.82 |
| 29.27  | 28.88   | 3.04   | 21.86  | 13.53   | 17.62   | 5.64  | -1.64 | -1.03 |
| 6.47   | 18.15   | 11.88  | 30.45  | 21.4    | 26.15   | 5.31  | 1.44  | 0.62  |
| 48.26  | 47.38   | 6.18   | 29.16  | 31.91   | 30.93   | 3.68  | -1.53 | -1.14 |
| 14.19  | 12.03   | 3.63   | 15.58  | 11.43   | 13.28   | 5.92  | 1.1   | 0.28  |
| 12.91  | 12.56   | 3.97   | 12.94  | 5.68    | 9.17    | 5.45  | -1.37 | -0.5  |
| 5.42   | 8.42    | 4.49   | 16.29  | 10.3    | 13.02   | 3.93  | 1.55  | 0.61  |
| 16.97  | 14.67   | 3.31   | 10.23  | 13.22   | 11.7    | 3.05  | -1.25 | -0.7  |
| 203.18 | 176.82  | 26.89  | 321.11 | 248.91  | 285.52  | 38.49 | 1.61  | 1.15  |
| 84.09  | 80.6    | 8.46   | 74.99  | 49.7    | 62.3    | 13.65 | -1.29 | -0.9  |
| 37.73  | 32.87   | 6.07   | 49.79  | 84.65   | 67.19   | 17.73 | 2.04  | 1.1   |
| 28.87  | 31.41   | 5.32   | 28.44  | 23.3    | 25.52   | 4.98  | -1.23 | -0.8  |

|        |        |        |        |        |        |       |       |       |
|--------|--------|--------|--------|--------|--------|-------|-------|-------|
| 817.2  | 928.46 | 137.29 | 345.95 | 286.57 | 315.47 | 41.72 | -2.94 | -2.09 |
| 20.64  | 22.66  | 3.2    | 14.65  | 18.94  | 16.89  | 3.16  | -1.34 | -0.92 |
| 131.61 | 136.61 | 8.72   | 166.58 | 89.83  | 128.4  | 39.12 | -1.06 | -0.7  |
| 3.49   | 6.18   | 4.73   | 6.51   | 5.16   | 5.9    | 5.01  | -1.05 | 0     |
| 161.61 | 153.84 | 11.07  | 118.62 | 73.33  | 96.42  | 24.29 | -1.6  | -1.1  |
| 66.18  | 68.12  | 6.46   | 35.88  | 46.38  | 40.35  | 6.93  | -1.69 | -1.25 |
| 70.71  | 80.45  | 12.04  | 143.8  | 111.43 | 126.6  | 20.32 | 1.57  | 1.08  |
| 12.41  | 15.57  | 4.61   | 22.29  | 31.12  | 27.14  | 5.62  | 1.74  | 0.98  |
| 14.28  | 7.62   | 6.68   | 13.41  | 10.75  | 12.13  | 1.54  | 1.59  | 0.63  |
| 52.11  | 51.8   | 3.67   | 49.23  | 72.56  | 61.05  | 12.03 | 1.18  | 0.79  |
| 22.97  | 14.82  | 8.69   | 19.31  | 34.73  | 27.6   | 9.24  | 1.86  | 0.66  |
| 16.24  | 18.07  | 2.57   | 21.25  | 11.04  | 16.35  | 5.75  | -1.1  | -0.65 |
| 35.66  | 39.46  | 4.3    | 28.65  | 7.87   | 18.44  | 10.75 | -2.14 | -1.06 |
| 60.72  | 56.02  | 6.32   | 47.48  | 35.54  | 41.48  | 7.46  | -1.35 | -0.97 |
| 30.02  | 34.92  | 6.11   | 41.5   | 28.74  | 36.32  | 8.22  | 1.04  | 0.61  |
| 5.36   | 7.56   | 5.53   | 8.54   | 5.22   | 6.81   | 4.31  | -1.11 | 0     |
| 34.72  | 35.03  | 2.65   | 24.74  | 17.46  | 21.71  | 4.98  | -1.61 | -1.14 |
| 187.81 | 174.31 | 14.56  | 201.41 | 180.53 | 192.01 | 14.29 | 1.1   | 0.92  |
| 214.02 | 175.18 | 38.99  | 129.63 | 64.06  | 96.92  | 33.4  | -1.81 | -0.95 |
| 21.81  | 19.75  | 3.59   | 10.27  | 20.16  | 15.1   | 5.55  | -1.31 | -0.72 |
| 227.03 | 212.55 | 18.9   | 162.43 | 109.54 | 134.69 | 29.29 | -1.58 | -1.12 |
| 33.22  | 35.9   | 4      | 28.98  | 42.05  | 35.54  | 7.02  | -1.01 | -0.71 |
| 42.18  | 44.69  | 4.19   | 20.6   | 35.24  | 27.89  | 7.55  | -1.6  | -1.07 |
| 4.25   | 6.64   | 6.21   | 8.23   | 2.01   | 5.2    | 3.66  | -1.28 | 0     |
| 18.04  | 22.48  | 4.97   | 33.46  | 8.32   | 21.95  | 14.63 | -1.02 | -0.43 |
| 10.82  | 12.02  | 3.06   | 15.8   | 12.63  | 14.21  | 2.63  | 1.18  | 0.71  |
| 14.29  | 11.35  | 3.66   | 17.02  | 8.88   | 12.65  | 5.44  | 1.12  | 0.31  |
| 52.23  | 29.44  | 22.78  | 23.71  | 22.74  | 23.35  | 1.75  | -1.26 | 0     |
| 43.46  | 43.44  | 4.88   | 30.27  | 25.26  | 27.63  | 6.11  | -1.57 | -1.08 |
| 35.97  | 35.69  | 2.77   | 42.8   | 35.73  | 38.6   | 5.47  | 1.08  | 0.81  |
| 52.97  | 51.85  | 4.6    | 42.74  | 53.6   | 47.46  | 7.05  | -1.09 | -0.83 |
| 4.51   | 7.88   | 4.99   | 4.82   | 9.78   | 6.65   | 5.1   | -1.18 | 0     |
| 19.03  | 27.33  | 9.24   | 24.52  | 24.23  | 24.44  | 3.44  | -1.12 | -0.49 |
| 17.66  | 21.36  | 4.19   | 32.94  | 31.97  | 32.5   | 3.2   | 1.52  | 1.09  |
| 4.04   | 4.33   | 3.74   | 2.97   | 10.11  | 5.58   | 6.24  | 1.29  | 0     |
| 62.79  | 63.58  | 2.3    | 49.12  | 40.36  | 45.47  | 6.39  | -1.4  | -1.13 |

|        |        |        |        |        |        |        |       |       |
|--------|--------|--------|--------|--------|--------|--------|-------|-------|
| 17.73  | 14.38  | 3.59   | 19.88  | 21.08  | 20.35  | 4.85   | 1.42  | 0.78  |
| 42.32  | 42     | 3.1    | 21.36  | 40.9   | 31.09  | 9.79   | -1.35 | -0.87 |
| 61.63  | 58.73  | 5.38   | 58.73  | 58.46  | 58.61  | 7.65   | -1    | -0.78 |
| 782.99 | 680.86 | 102.17 | 686.15 | 215.64 | 450.93 | 236.52 | -1.51 | -0.76 |
| 1.53   | 10.05  | 9.47   | 1      | 2.41   | 1.51   | 1.92   | -6.66 | 0     |
| 20.43  | 16.82  | 5.84   | 22.32  | 17.02  | 19.69  | 6.52   | 1.17  | 0.48  |
| 36.91  | 30.24  | 6.87   | 27.46  | 34.85  | 31.45  | 3.97   | 1.04  | 0.7   |
| 13.14  | 10.74  | 3.14   | 9.94   | 17.47  | 13.96  | 4.38   | 1.3   | 0.57  |
| 17.14  | 21.65  | 6.73   | 22.4   | 17.59  | 19.67  | 4.31   | -1.1  | -0.51 |
| 6.85   | 5.55   | 2.76   | 14.16  | 12.72  | 13.42  | 4.66   | 2.42  | 0.87  |
| 590.21 | 544.85 | 46.52  | 318.95 | 221.18 | 270.51 | 50.51  | -2.01 | -1.48 |
| 29.53  | 27.3   | 3.06   | 28.78  | 50.06  | 38.33  | 11.86  | 1.4   | 0.68  |
| 25.21  | 28.51  | 4.4    | 26.5   | 31.6   | 29.52  | 3.83   | 1.04  | 0.74  |
| 27.66  | 32.53  | 5.76   | 30.01  | 30.06  | 30.05  | 4.22   | -1.08 | -0.73 |
| 53.65  | 55.69  | 3.52   | 54.99  | 61.2   | 57.2   | 6.43   | 1.03  | 0.82  |
| 8.09   | 7.94   | 3.23   | 11.82  | 9.67   | 11.13  | 5.06   | 1.4   | 0.33  |
| 3.71   | 3.98   | 3.68   | 4.06   | 20.32  | 10.9   | 10.24  | 2.74  | 0     |
| 14.39  | 11.38  | 4.44   | 16.93  | 20.82  | 18.84  | 3.04   | 1.66  | 0.92  |
| 21.74  | 21.87  | 3.04   | 26.21  | 14.82  | 19.91  | 8.24   | -1.1  | -0.61 |
| 35.05  | 35.08  | 3.1    | 35.8   | 13.31  | 24.57  | 11.53  | -1.43 | -0.79 |
| 14.65  | 18.6   | 4.71   | 4.86   | 16.37  | 9.71   | 7.1    | -1.92 | -0.73 |
| 11.77  | 15.41  | 4.99   | 32.63  | 9.26   | 20.81  | 12.16  | 1.35  | 0.05  |
| 61.65  | 59.87  | 4.41   | 99.61  | 69.3   | 84.45  | 15.95  | 1.41  | 0.96  |
| 45.72  | 47.49  | 2.83   | 42.3   | 32.36  | 37.51  | 5.47   | -1.27 | -1    |
| 33.58  | 30.17  | 4.6    | 40.88  | 27.27  | 34.04  | 8.54   | 1.13  | 0.64  |
| 1.93   | 1.79   | 1.46   | 6.92   | 28.57  | 17.83  | 11.37  | 9.98  | 0     |
| 133.73 | 144.89 | 13.4   | 214.64 | 251.76 | 231.44 | 21.73  | 1.6   | 1.28  |
| 329.73 | 291.81 | 41.12  | 897.95 | 628.38 | 756.79 | 146.87 | 2.59  | 1.68  |



| upper bound | difference of it | statistic | P value  | filtered |
|-------------|------------------|-----------|----------|----------|
| -3.18       | -78.32           | -4.285    | 0.060063 | *        |
| -2.07       | -192.91          | -7.081    | 0.028925 | *        |
| 3.84        | 540.45           | 6.717     | 0.039087 | *        |
| -2.28       | -96.98           | -6.843    | 0.02833  | *        |
| -5.8        | -1040.18         | -3.188    | 0.089591 | *        |
| -2.06       | -174.83          | -6.59     | 0.024945 | *        |
| 2.13        | 472.74           | 1.064     | 0.468365 |          |
| 1.63        | 134.92           | 0.37      | 0.751378 |          |
| 1.67        | 143.6            | 0.536     | 0.668195 |          |
| 1.74        | 375.77           | 0.529     | 0.665377 |          |
| 1.58        | 666.7            | 4         | 0.094059 |          |
| 2.7         | 180.19           | 1.273     | 0.416958 |          |
| -47.67      | -2.54            | -0.191    | 0.867543 |          |
| -2.12       | -164.13          | -1.247    | 0.415341 |          |
| -1.95       | -157.28          | -0.87     | 0.522659 |          |
| -1.65       | -536.14          | -1.546    | 0.267214 |          |
| -3.31       | -55.49           | -2.558    | 0.171441 |          |
| 2.78        | 406.84           | 1.965     | 0.284988 |          |

|            |         |        |          |
|------------|---------|--------|----------|
| -4.27      | -6.71   | -1.37  | 0.330056 |
| -2.31      | -165.15 | -4.722 | 0.06564  |
| 4.93       | 14.46   | 0.51   | 0.696408 |
| -100000000 | -15.96  | -0.583 | 0.626767 |
| 1.56       | 14.41   | 0.322  | 0.78656  |
| -3.65      | -13.94  | -0.479 | 0.704845 |
| 1.38       | 312.49  | 4.116  | 0.064521 |
| -2.56      | -52.98  | -2.726 | 0.12385  |
| 1.69       | 173.83  | 1.158  | 0.388296 |
| -2.71      | -124.92 | -0.913 | 0.499303 |
| 1.14       | 1.55    | 0.049  | 0.966418 |
| 1.35       | 99.5    | 0.885  | 0.49149  |
| 1.28       | 37.09   | 1.105  | 0.390705 |
| -1.76      | -300.92 | -1.04  | 0.47854  |
| 2.09       | 16.26   | 0.25   | 0.84284  |
| -1.41      | -84.6   | -1.556 | 0.290721 |
| 100000000  | 4.45    | 0.534  | 0.646957 |
| -2.05      | -28.16  | -1.216 | 0.362151 |
| -3.61      | -66.46  | -2.095 | 0.205057 |
| 1.74       | 6.44    | 0.337  | 0.769258 |
| 1.71       | 147.78  | 4.356  | 0.050191 |
| -2.5       | -3.99   | -0.341 | 0.769258 |
| -100000000 | -16.99  | -1.412 | 0.371063 |
| 1.98       | 18.87   | 1.238  | 0.347689 |
| -1.43      | -178.13 | -5.056 | 0.040811 |
| -1.3       | -148.79 | -4.22  | 0.060042 |
| -4.87      | -2.67   | -0.275 | 0.809453 |
| 2.84       | 3.13    | 0.111  | 0.92523  |
| -6.47      | -376.28 | -1.189 | 0.40822  |
| -1.35      | -1.38   | -0.126 | 0.913502 |
| -1.61      | -299.9  | -0.994 | 0.427529 |
| -2.33      | -13.84  | -1.278 | 0.380447 |
| -2.49      | -17.48  | -0.353 | 0.762156 |
| -4.35      | -116.78 | -1.443 | 0.36215  |
| -2.44      | -77.22  | -1.268 | 0.416575 |
| -1.47      | -80.96  | -4.486 | 0.046502 |

|            |         |        |          |
|------------|---------|--------|----------|
| 1.87       | 78.32   | 4.684  | 0.042681 |
| -1.3       | -804.91 | -2.231 | 0.174492 |
| -1.81      | -42.76  | -2.149 | 0.18903  |
| 2.06       | 104.73  | 1.922  | 0.225984 |
| -1.91      | -34.22  | -2.636 | 0.127958 |
| -1.66      | -53.86  | -0.887 | 0.478073 |
| -1.82      | -52.99  | -0.676 | 0.586588 |
| 1.36       | 4.87    | 0.279  | 0.808988 |
| -100000000 | -0.81   | -0.206 | 0.85636  |
| -4.3       | -416.37 | -3.922 | 0.105474 |
| -3.04      | -7.41   | -0.594 | 0.622431 |
| -2.01      | -449.37 | -0.594 | 0.62004  |
| -1.31      | -40.18  | -0.543 | 0.641993 |
| -6.89      | -2.77   | -0.234 | 0.836958 |
| -11.53     | -35     | -1.005 | 0.459837 |
| -2.42      | -11.6   | -1.129 | 0.403413 |
| -2.38      | -59.6   | -0.858 | 0.51346  |
| -100000000 | -0.08   | -0.009 | 0.993816 |
| -1.53      | -87.49  | -0.213 | 0.862659 |
| -3.38      | -5.78   | -0.977 | 0.432993 |
| -100000000 | -2.73   | -0.288 | 0.806763 |
| -3.05      | -7.09   | -0.742 | 0.535481 |
| 1.12       | 0.69    | 0.031  | 0.978529 |
| 2.16       | 4.83    | 0.5    | 0.673893 |
| 1.68       | 12.65   | 0.382  | 0.761465 |
| -2         | -69.6   | -0.948 | 0.469201 |
| 4.02       | 1.02    | 0.067  | 0.955973 |
| -1.89      | -49.2   | -2.683 | 0.139784 |
| -2.37      | -8.22   | -0.862 | 0.522389 |
| -2.05      | -119.57 | -4.061 | 0.056019 |
| 2.09       | 4.42    | 0.577  | 0.648244 |
| 1.61       | 18.07   | 1.831  | 0.232059 |
| 7.56       | 6.96    | 0.537  | 0.674645 |
| -3.55      | -7.49   | -0.423 | 0.729292 |
| 100000000  | 0.75    | 0.063  | 0.955548 |
| -8.15      | -0.77   | -0.07  | 0.950632 |

|            |         |        |          |
|------------|---------|--------|----------|
| 1.59       | 203.81  | 2.209  | 0.255077 |
| -2.41      | -25.52  | -0.779 | 0.519961 |
| -2.48      | -232.76 | -0.478 | 0.690146 |
| -1.14      | -9.76   | -0.153 | 0.892587 |
| -2.54      | -209.41 | -1.02  | 0.418408 |
| 1.72       | 99.31   | 0.437  | 0.736882 |
| 1.45       | 66.64   | 0.913  | 0.458802 |
| -1.21      | -59.18  | -0.777 | 0.55196  |
| -2.25      | -48.96  | -2.076 | 0.237754 |
| 4          | 851.46  | 2.488  | 0.198171 |
| -2.05      | -248.97 | -2.605 | 0.202467 |
| -2.93      | -146.51 | -2.373 | 0.141463 |
| 1.99       | 315.13  | 0.827  | 0.556408 |
| -1.33      | -267.8  | -2.012 | 0.235894 |
| 3.8        | 0.98    | 0.069  | 0.952526 |
| 2.9        | 5.54    | 0.486  | 0.682285 |
| -4.84      | -1.16   | -0.114 | 0.919454 |
| 100000000  | 1.51    | 0.089  | 0.937566 |
| -1.96      | -81.96  | -1.973 | 0.219933 |
| -1.78      | -99.91  | -0.579 | 0.662448 |
| -100000000 | -0.27   | -0.032 | 0.977387 |
| -1.27      | -441.12 | -0.305 | 0.810213 |
| -2.22      | -0.11   | -0.019 | 0.986771 |
| 1.93       | 1.63    | 0.188  | 0.871736 |
| 1.56       | 0.45    | 0.044  | 0.968851 |
| 1.85       | 33.16   | 4.654  | 0.043293 |
| -3.68      | -3.11   | -0.557 | 0.654988 |
| -9.05      | -36.43  | -1.954 | 0.211493 |
| 1.69       | 1.57    | 0.067  | 0.956389 |
| -4.61      | -3.76   | -0.174 | 0.880687 |
| -1.5       | -45.43  | -3.734 | 0.065158 |
| 1.47       | 91.54   | 0.818  | 0.554854 |
| 2.17       | 7.78    | 1.337  | 0.314619 |
| 2.04       | 58.21   | 1.069  | 0.462961 |
| 1.87       | 912.57  | 3.213  | 0.177432 |
| -2.03      | -5.07   | -0.778 | 0.521321 |

|            |         |        |          |
|------------|---------|--------|----------|
| -5.82      | -2.91   | -0.153 | 0.893145 |
| -100000000 | -16.05  | -1.648 | 0.256467 |
| -1.33      | -279.1  | -2.069 | 0.227314 |
| -1.24      | -304.99 | -0.494 | 0.704819 |
| -2.02      | -6.17   | -0.117 | 0.9248   |
| -1.28      | -45.81  | -1.565 | 0.258345 |
| 1.86       | 195.77  | 1.71   | 0.317756 |
| 1.42       | 324.14  | 2.49   | 0.198445 |
| 1.55       | 285.73  | 0.604  | 0.653643 |
| 1.59       | 36.25   | 1.693  | 0.235524 |
| -1.31      | -35.72  | -0.504 | 0.667985 |
| 1.45       | 59.62   | 0.369  | 0.769929 |
| -1.77      | -71.05  | -1.373 | 0.307839 |
| -1.75      | -110.45 | -4.224 | 0.057119 |
| -1.5       | -1.15   | -0.008 | 0.994336 |
| -2.79      | -7.16   | -0.514 | 0.667416 |
| 1.56       | 85.58   | 3.965  | 0.103399 |
| 3.8        | 3.73    | 0.28   | 0.807649 |
| -11.19     | -1.42   | -0.462 | 0.704117 |
| 100000000  | 0       | 0      | 1        |
| -2.78      | -103.03 | -3.614 | 0.11705  |
| -5.79      | -9.76   | -0.809 | 0.503351 |
| 1.69       | 15.6    | 0.949  | 0.447806 |
| -1.34      | -8.08   | -0.662 | 0.607367 |
| -1.77      | -3.18   | -0.425 | 0.716106 |
| -100000000 | -15.24  | -1.7   | 0.270586 |
| -2.22      | -46.54  | -1.647 | 0.306156 |
| 1.81       | 213.91  | 3.905  | 0.125166 |
| -1.69      | -474.91 | -1.334 | 0.366395 |
| 100000000  | 1.12    | 0.297  | 0.794852 |
| -1.77      | -18.14  | -0.069 | 0.95572  |
| 4.89       | 20.39   | 2.509  | 0.147145 |
| 1.71       | 3.93    | 0.2    | 0.866066 |
| -1.72      | -8.64   | -0.989 | 0.455781 |
| 2.1        | 5.21    | 0.739  | 0.549553 |
| 2.03       | 502.74  | 1.361  | 0.396842 |

|            |         |        |          |
|------------|---------|--------|----------|
| 100000000  | 11.03   | 0.607  | 0.640335 |
| 1.68       | 135.05  | 0.967  | 0.477541 |
| -2.41      | -2      | -0.143 | 0.901348 |
| 2.41       | 11.45   | 1.218  | 0.350071 |
| -1.77      | -55.07  | -4.799 | 0.041273 |
| -3.98      | -14.07  | -1.541 | 0.263193 |
| -1.59      | -154.1  | -7.071 | 0.027126 |
| -1.21      | -341.22 | -1.187 | 0.414095 |
| -1.79      | -7.3    | -0.748 | 0.533218 |
| -2.33      | -7.05   | -0.159 | 0.89142  |
| -1.62      | -339.16 | -2.364 | 0.158197 |
| 1.24       | 0.54    | 0.01   | 0.992839 |
| 2.03       | 13.53   | 0.961  | 0.450423 |
| 1.36       | 26.55   | 1.07   | 0.405112 |
| 1.6        | 118.55  | 1.07   | 0.402004 |
| -3.64      | -14.34  | -0.716 | 0.556862 |
| -1.33      | -73.7   | -1.835 | 0.257609 |
| -100000000 | -0.88   | -0.348 | 0.762146 |
| -2.03      | -14.42  | -0.501 | 0.688732 |
| -4.95      | -2.17   | -0.228 | 0.849023 |
| -3.07      | -25.17  | -1.525 | 0.275096 |
| -1.91      | -30.63  | -1.032 | 0.47451  |
| 1.2        | 116.73  | 1.937  | 0.192596 |
| -1.99      | -344.24 | -2.711 | 0.1188   |
| -3.11      | -14.34  | -0.874 | 0.475766 |
| 1.35       | 13.39   | 0.129  | 0.90945  |
| 1.67       | 16.55   | 0.246  | 0.843833 |
| -3.36      | -12.68  | -0.54  | 0.647287 |
| 1.74       | 294.51  | 3.895  | 0.091047 |
| -2.01      | -49.37  | -1.353 | 0.343242 |
| -100000000 | -6.62   | -1.058 | 0.401282 |
| -100000000 | -1.91   | -0.67  | 0.587013 |
| -2.02      | -21.22  | -1.598 | 0.25309  |
| -33.44     | -5.24   | -0.763 | 0.533225 |
| -1.7       | -252.66 | -4.109 | 0.13179  |
| 2.68       | 41.45   | 0.865  | 0.530285 |

|            |          |         |            |
|------------|----------|---------|------------|
| 100000000  | 1.77     | 0.435   | 0.716104   |
| -100000000 | -2.86    | -0.261  | 0.81873    |
| -2.01      | -112.71  | -0.799  | 0.509294   |
| -2.46      | -0.26    | -0.025  | 0.982435   |
| -2.82      | -26.57   | -1.005  | 0.448302   |
| 1.35       | 5.49     | 0.666   | 0.578558   |
| -3.97      | -133.6   | -3.016  | 0.172272   |
| -100000000 | -2.04    | -0.416  | 0.734991   |
| -1.51      | -600.75  | -2.457  | 0.204974   |
| 3.71       | 61.61    | 1.167   | 0.435561   |
| 3.41       | 66.59    | 1.268   | 0.39964    |
| 1.92       | 101.72   | 2.035   | 0.276416   |
| 2.77       | 62.84    | 1.578   | 0.330269   |
| -1.75      | -8.37    | -1.172  | 0.381628   |
| -2.03      | -4.61    | -0.464  | 0.689226   |
| -2.26      | -81.16   | -2.172  | 0.163996   |
| -6.37      | -17.8    | -0.395  | 0.7532     |
| -1.54      | -38.34   | -0.755  | 0.572866   |
| 1.48       | 14.43    | 0.06    | 0.960952   |
| -4.34      | -37.55   | -2.158  | 0.22744    |
| -1.15      | -24.13   | -1.088  | 0.390536   |
| -1.95      | -0.98    | -0.094  | 0.933837   |
| -2.04      | -73.19   | -2.048  | 0.26958    |
| 2.85       | 7.17     | 0.501   | 0.666434   |
| -4.37      | -53.17   | -3.603  | 0.074606 * |
| 2.61       | 1285.45  | 10.726  | 0.015552 * |
| -3.53      | -243.9   | -8.095  | 0.062212 * |
| -100000000 | -21.14   | -4.145  | 0.055113 * |
| 2.12       | 242.05   | 6.073   | 0.053925 * |
| 3.31       | 752.3    | 11.88   | 0.041774 * |
| 3.71       | 1482.98  | 20.361  | 0.021261 * |
| -2.5       | -1177.88 | -6.249  | 0.078818 * |
| -2.19      | -95.65   | -5.945  | 0.034726 * |
| 7.27       | 35.4     | 3.513   | 0.074554 * |
| -2.7       | -276.72  | -10.675 | 0.008664 * |
| -3.21      | -74.12   | -5.57   | 0.053465 * |

|            |          |         |            |
|------------|----------|---------|------------|
| 3.82       | 1008.34  | 4.406   | 0.091912 * |
| 19.25      | 24.83    | 3.731   | 0.083774 * |
| 5          | 29.06    | 4.695   | 0.042508 * |
| -6.43      | -271.77  | -3.759  | 0.098587 * |
| -20.37     | -26.28   | -4.929  | 0.097284 * |
| 1.95       | 735.67   | 8.693   | 0.046755 * |
| 2.38       | 738.56   | 7.013   | 0.019735 * |
| -3.2       | -507.21  | -3.895  | 0.074794 * |
| 1.9        | 422.83   | 7.349   | 0.042839 * |
| 6.23       | 21.38    | 3.983   | 0.063519 * |
| -4.08      | -57.55   | -4.202  | 0.063701 * |
| -2.31      | -94.84   | -9.005  | 0.013071 * |
| 2.48       | 100.41   | 4.017   | 0.093583 * |
| -100000000 | -24.64   | -5.073  | 0.038177 * |
| 3.6        | 24.72    | 3.933   | 0.060867 * |
| -2.89      | -4738.84 | -9.234  | 0.024955 * |
| -1.92      | -451.63  | -7.613  | 0.033804 * |
| -39.5      | -30.2    | -3.611  | 0.069959 * |
| -2.2       | -374.9   | -5.782  | 0.039796 * |
| -9.14      | -23.11   | -3.492  | 0.076711 * |
| -3.01      | -38.95   | -6.201  | 0.025435 * |
| 2.12       | 64.88    | 5.794   | 0.0346 *   |
| 2.83       | 1189.51  | 7.383   | 0.02549 *  |
| 100000000  | 20.27    | 3.772   | 0.079255 * |
| -1.83      | -551.98  | -10.377 | 0.027844 * |
| 2.76       | 703.62   | 8.716   | 0.028547 * |
| 3.19       | 1008.44  | 8.351   | 0.042563 * |
| -3.81      | -80      | -4.665  | 0.046017 * |
| 3.89       | 934.5    | 20.872  | 0.008676 * |
| -2.29      | -182.58  | -5.799  | 0.037997 * |
| 1.86       | 557.47   | 8.308   | 0.047935 * |
| 2.83       | 278.86   | 5.715   | 0.040527 * |
| 2.55       | 42.81    | 5.201   | 0.0385 *   |
| -2.66      | -34.32   | -4.563  | 0.05077 *  |
| -2.5       | -51      | -5.384  | 0.044121 * |
| 3.08       | 48.14    | 7.904   | 0.022183 * |



|        |         |        |            |
|--------|---------|--------|------------|
| -3.27  | -27.26  | -3.857 | 0.061206 * |
| 2.3    | 407.5   | 4.547  | 0.069887 * |
| 2.47   | 35.26   | 4.846  | 0.050011 * |
| -25.83 | -34.39  | -3.434 | 0.075587 * |
| -3.09  | -40     | -5.031 | 0.082667 * |
| -11.67 | -35.86  | -4.854 | 0.063024 * |
| 3.12   | 25.03   | 3.784  | 0.069353 * |
| 2.06   | 326.61  | 11.396 | 0.012721 * |
| 15.92  | 23.63   | 4.11   | 0.061056 * |
| 4.34   | 103.85  | 4.673  | 0.084525 * |
| -8.4   | -28.01  | -3.972 | 0.06021 *  |
| 2.13   | 110.57  | 4.813  | 0.086049 * |
| -5.79  | -28.92  | -3.506 | 0.073993 * |
| -1.41  | -403.17 | -3.96  | 0.110845   |
| -1.77  | -25.7   | -2.223 | 0.160884   |
| 2.06   | 98.1    | 2.422  | 0.206819   |
| 2.37   | 2052.04 | 3.904  | 0.151077   |
| 2.5    | 6.95    | 0.632  | 0.592269   |
| 1.96   | 4.32    | 0.282  | 0.804763   |
| -4.48  | -60.5   | -1.999 | 0.264909   |
| 1.9    | 1076.49 | 2.245  | 0.193549   |
| 4.09   | 101.25  | 4.349  | 0.131197   |
| -5.23  | -8.6    | -0.666 | 0.602935   |
| -1.91  | -8.45   | -1.12  | 0.379391   |
| 3.51   | 587.45  | 0.753  | 0.54955    |
| 1.68   | 209.87  | 5.121  | 0.050728   |
| 1.26   | 0.94    | 0.04   | 0.973311   |
| -5.19  | -18.52  | -1.7   | 0.299638   |
| 3.4    | 10.1    | 1.391  | 0.300081   |
| 2.59   | 2.5     | 0.33   | 0.772846   |
| 3.65   | 11.23   | 1.399  | 0.3269     |
| -1.73  | -68.81  | -4.428 | 0.052781   |
| -13.34 | -18.08  | -2.193 | 0.223372   |
| -2.21  | -70.37  | -3.46  | 0.07455    |
| -2.67  | -20.38  | -0.258 | 0.822785   |
| -1.35  | -18.82  | -0.702 | 0.555827   |

|            |        |        |          |
|------------|--------|--------|----------|
| 1.86       | 11.5   | 3.374  | 0.083412 |
| 1.25       | 98.02  | 0.719  | 0.578426 |
| -3.48      | -0.59  | -0.046 | 0.96816  |
| 2.32       | 137.75 | 4.048  | 0.105282 |
| -1.39      | -37.24 | -0.661 | 0.61812  |
| 3.18       | 5.55   | 0.989  | 0.44043  |
| -1.95      | -8.75  | -1.7   | 0.233168 |
| 1.57       | 0.3    | 0.029  | 0.980959 |
| 2.66       | 2.56   | 0.218  | 0.858278 |
| -100000000 | -9     | -1.117 | 0.445194 |
| -2.55      | -18.76 | -1.268 | 0.351899 |
| -4.12      | -4.6   | -0.331 | 0.784258 |
| -1.52      | -19.51 | -1.411 | 0.334598 |
| 2.06       | 22.71  | 0.991  | 0.489852 |
| -1.8       | -12.62 | -2.513 | 0.132608 |
| 2.41       | 57.85  | 4.193  | 0.052591 |
| 3.87       | 2.75   | 0.289  | 0.802973 |
| 3.29       | 14.49  | 1.922  | 0.194504 |
| 1.84       | 167.58 | 3.27   | 0.087496 |
| -2.67      | -4.82  | -1.057 | 0.403816 |
| 2.01       | 78.2   | 4.504  | 0.083415 |
| -1.6       | -14.27 | -1.581 | 0.311282 |
| 1.68       | 5.12   | 1.192  | 0.368789 |
| 4.78       | 6.86   | 1.254  | 0.336686 |
| -2.12      | -3.22  | -0.914 | 0.45723  |
| -3.5       | -11.26 | -1.757 | 0.257081 |
| 100000000  | 8      | 0.615  | 0.624187 |
| -2.05      | -16.45 | -2.288 | 0.177503 |
| 2.65       | 1.24   | 0.179  | 0.87762  |
| -62.51     | -3.39  | -0.503 | 0.668878 |
| 12.72      | 4.6    | 0.77   | 0.522871 |
| -2.37      | -2.97  | -0.66  | 0.577533 |
| 2.29       | 108.7  | 2.315  | 0.161373 |
| -2.07      | -18.31 | -1.14  | 0.391557 |
| 3.41       | 34.32  | 1.831  | 0.280764 |
| -1.94      | -5.88  | -0.807 | 0.504493 |

|            |        |        |          |
|------------|--------|--------|----------|
| -4.08      | -613   | -4.272 | 0.116598 |
| -2.04      | -5.77  | -1.281 | 0.328761 |
| -2.14      | -8.2   | -0.205 | 0.869094 |
| -100000000 | -0.28  | -0.041 | 0.971006 |
| -2.75      | -57.42 | -2.151 | 0.216498 |
| -2.42      | -27.78 | -2.931 | 0.099961 |
| 2.27       | 46.15  | 1.954  | 0.218483 |
| 3.59       | 11.57  | 1.592  | 0.256873 |
| 100000000  | 4.51   | 0.659  | 0.620347 |
| 1.6        | 9.25   | 0.736  | 0.579918 |
| 52.36      | 12.78  | 1.008  | 0.419955 |
| -2.67      | -1.72  | -0.272 | 0.82037  |
| -51.33     | -21.02 | -1.816 | 0.272424 |
| -1.99      | -14.54 | -1.487 | 0.278479 |
| 1.65       | 1.4    | 0.137  | 0.904628 |
| -100000000 | -0.75  | -0.107 | 0.924748 |
| -2.62      | -13.32 | -2.359 | 0.180476 |
| 1.33       | 17.69  | 0.867  | 0.477303 |
| -4.37      | -78.26 | -1.524 | 0.269697 |
| -3.4       | -4.65  | -0.704 | 0.564687 |
| -2.5       | -77.86 | -2.234 | 0.176247 |
| -1.54      | -0.35  | -0.044 | 0.969839 |
| -2.93      | -16.8  | -1.946 | 0.225476 |
| -100000000 | -1.44  | -0.2   | 0.863926 |
| -100000000 | -0.53  | -0.035 | 0.977195 |
| 2.15       | 2.19   | 0.542  | 0.64292  |
| 2.79       | 1.31   | 0.2    | 0.862385 |
| -2.9       | -6.08  | -0.266 | 0.833923 |
| -2.54      | -15.81 | -2.022 | 0.186758 |
| 1.39       | 2.91   | 0.475  | 0.695471 |
| -1.49      | -4.4   | -0.522 | 0.66094  |
| -100000000 | -1.23  | -0.172 | 0.879089 |
| -1.88      | -2.9   | -0.294 | 0.809524 |
| 2.31       | 11.14  | 2.112  | 0.177785 |
| 100000000  | 1.25   | 0.172  | 0.882462 |
| -1.83      | -18.12 | -2.667 | 0.185466 |

|            |         |        |          |
|------------|---------|--------|----------|
| 2.63       | 5.97    | 0.989  | 0.434323 |
| -2.82      | -10.91  | -1.062 | 0.456579 |
| -1.32      | -0.12   | -0.013 | 0.991067 |
| -11.05     | -229.93 | -0.892 | 0.501765 |
| -100000000 | -8.54   | -0.884 | 0.529919 |
| 3          | 2.86    | 0.327  | 0.775129 |
| 1.72       | 1.21    | 0.153  | 0.895443 |
| 2.81       | 3.22    | 0.598  | 0.616125 |
| -2.02      | -1.98   | -0.248 | 0.830991 |
| 13.69      | 7.87    | 1.453  | 0.309521 |
| -2.97      | -274.33 | -3.995 | 0.057961 |
| 2.23       | 11.03   | 0.901  | 0.518571 |
| 1.47       | 1.01    | 0.173  | 0.878524 |
| -1.56      | -2.48   | -0.348 | 0.763708 |
| 1.26       | 1.51    | 0.206  | 0.860457 |
| 4.75       | 3.2     | 0.532  | 0.655913 |
| 100000000  | 6.92    | 0.637  | 0.620666 |
| 4.71       | 7.47    | 1.388  | 0.314267 |
| -3.48      | -1.96   | -0.224 | 0.853638 |
| -6.28      | -10.51  | -0.88  | 0.52524  |
| -100000000 | -8.89   | -1.044 | 0.420076 |
| 3.72       | 5.4     | 0.411  | 0.73761  |
| 1.91       | 24.59   | 1.485  | 0.353463 |
| -1.69      | -9.97   | -1.619 | 0.285605 |
| 1.77       | 3.87    | 0.399  | 0.738289 |
| 100000000  | 16.04   | 1.399  | 0.38959  |
| 1.99       | 86.55   | 3.39   | 0.098812 |
| 3.8        | 464.98  | 3.049  | 0.174008 |
